# Supplementary material for: Network-based analysis implies critical roles of microRNAs in the long-term cellular responses to gold nanoparticles
Source: Royal Society of Chemistry journal article supplement (doi:10.1039/d0nr04701e), 2020-01-01
Supplement: d0nr04701e1.xlsx [file d0nr04701e1.xlsx]

## Sheet: miRNAs by module
Turquoise	Blue	Brown	Yellow	Green	Red	Black	Pink	Magenta	Purple	Green Yellow	Tan	Salmon	Cyan	Midnight Blue	Light Cyan
hsa-let-7i-5p	hsa-miR-342-5p	hsa-miR-193a-3p	hsa-miR-335-3p	hsa-miR-376a-2-5p	hsa-miR-543	hsa-miR-421	hsa-miR-210-3p	hsa-miR-4788	hsa-miR-193b-3p	hsa-miR-1180-5p	hsa-miR-3200-3p	hsa-miR-22-5p	hsa-miR-3196	hsa-miR-570-5p	hsa-miR-212-5p
hsa-miR-100-3p	hsa-miR-29b-1-5p	hsa-miR-24-1-5p	hsa-miR-758-5p	hsa-miR-4787-3p	hsa-miR-129-5p	hsa-miR-431-5p	hsa-miR-140-3p	hsa-miR-25-3p	hsa-miR-129-2-3p	hsa-miR-1293	hsa-miR-23c	hsa-miR-4521	hsa-miR-451a	hsa-miR-548ai	hsa-miR-497-5p
hsa-miR-101-3p	hsa-miR-4455	hsa-miR-192-5p	hsa-miR-7704	hsa-miR-194-5p	hsa-miR-128-3p	hsa-miR-92b-3p	hsa-miR-152-3p	hsa-miR-93-5p	hsa-miR-365a-3p	hsa-miR-92a-3p	hsa-miR-34a-3p	hsa-miR-27a-5p	hsa-miR-4662a-5p	hsa-miR-6798-3p	hsa-miR-6787-3p
hsa-miR-1185-1-3p	hsa-miR-17-5p	hsa-miR-4731-3p	hsa-miR-376b-3p	hsa-miR-28-5p	hsa-let-7g-5p	hsa-miR-485-5p	hsa-miR-224-3p	hsa-miR-503-5p	hsa-miR-365b-3p	hsa-miR-195-3p	hsa-miR-188-5p	hsa-miR-454-3p	hsa-miR-4440	hsa-miR-874-3p	hsa-miR-877-3p
hsa-miR-125b-2-3p	hsa-miR-532-3p	hsa-miR-330-5p	hsa-miR-30d-5p	hsa-miR-425-5p	hsa-miR-487b-3p	hsa-miR-423-5p	hsa-miR-1185-2-3p	hsa-miR-320c	hsa-miR-210-5p	hsa-miR-671-3p	hsa-miR-324-5p	hsa-miR-628-5p	hsa-miR-6833-3p	hsa-miR-3913-5p	hsa-miR-27b-5p
hsa-miR-126-5p	hsa-miR-494-3p	hsa-miR-3120-3p	hsa-miR-26a-5p	hsa-miR-195-5p	hsa-let-7f-5p	hsa-miR-3184-3p	hsa-miR-493-3p	hsa-miR-664a-5p	hsa-miR-629-5p	hsa-miR-103a-3p	hsa-miR-542-5p	hsa-miR-299-5p	hsa-miR-509-3-5p	hsa-miR-3913-3p	hsa-miR-99b-5p
hsa-miR-127-5p	hsa-miR-337-3p	hsa-miR-548d-5p	hsa-miR-224-5p	hsa-miR-191-3p	hsa-miR-493-5p	hsa-miR-2110	hsa-miR-548h-5p	hsa-miR-1180-3p	hsa-miR-887-3p	hsa-miR-103b	hsa-miR-548w	hsa-miR-500a-5p	hsa-miR-6886-5p	hsa-miR-3188	hsa-miR-625-3p
hsa-miR-1277-5p	hsa-miR-615-3p	hsa-miR-19a-3p	hsa-miR-452-5p	hsa-miR-450a-1-3p	hsa-let-7c-5p	hsa-miR-193a-5p	hsa-miR-137	hsa-miR-382-5p	hsa-miR-548o-3p	hsa-miR-204-5p	hsa-miR-548am-5p	hsa-miR-199a-3p	hsa-miR-4804-3p	hsa-miR-664b-5p	hsa-miR-324-3p
hsa-miR-1278	hsa-miR-1285-5p	hsa-miR-590-3p	hsa-miR-98-5p	hsa-miR-331-5p	hsa-miR-323a-3p	hsa-miR-193b-5p	hsa-miR-186-5p	hsa-miR-155-5p	hsa-miR-376c-3p	hsa-miR-1301-3p	hsa-miR-548c-5p	hsa-miR-199b-3p	hsa-miR-338-5p	hsa-miR-3691-3p	hsa-miR-146a-5p
hsa-miR-132-5p	hsa-miR-1249-3p	hsa-miR-130a-3p	hsa-miR-181a-5p	hsa-miR-214-5p	hsa-miR-877-5p	hsa-miR-3605-3p	hsa-miR-130b-3p	hsa-miR-320a	hsa-miR-495-3p	hsa-miR-3120-5p	hsa-miR-548o-5p	hsa-miR-1296-5p	hsa-miR-7975	hsa-miR-7854-3p	hsa-miR-490-5p
hsa-miR-136-3p	hsa-miR-342-3p	hsa-miR-301a-3p	hsa-miR-181b-5p	hsa-let-7i-3p	hsa-miR-132-3p	hsa-miR-6511b-3p	hsa-miR-532-5p	hsa-miR-320b	hsa-miR-655-3p	hsa-miR-6724-5p	hsa-miR-433-5p	hsa-miR-24-2-5p
hsa-miR-143-3p	hsa-miR-484	hsa-miR-27a-3p	hsa-miR-26b-5p	hsa-miR-22-3p	hsa-miR-99b-3p	hsa-miR-365b-5p	hsa-miR-660-5p	hsa-miR-221-3p	hsa-let-7a-2-3p	hsa-miR-891a-5p	hsa-miR-758-3p	hsa-miR-30b-5p
hsa-miR-146b-3p	hsa-miR-486-3p	hsa-miR-199a-5p	hsa-miR-376a-3p	hsa-miR-411-5p	hsa-miR-1270	hsa-miR-130b-5p	hsa-miR-34a-5p	hsa-miR-424-3p	hsa-miR-3619-5p	hsa-miR-6511b-5p
hsa-miR-148a-3p	hsa-miR-576-5p	hsa-miR-32-5p	hsa-miR-369-3p	hsa-miR-339-3p	hsa-miR-432-5p	hsa-miR-485-3p	hsa-miR-380-5p	hsa-miR-433-3p
hsa-miR-148b-5p	hsa-miR-15b-3p	hsa-miR-424-5p	hsa-miR-382-3p	hsa-miR-345-5p	hsa-miR-574-5p	hsa-miR-134-5p	hsa-miR-148b-3p	hsa-miR-320d
hsa-miR-152-5p	hsa-miR-185-5p	hsa-miR-15a-5p	hsa-miR-3184-5p	hsa-miR-31-5p	hsa-miR-23a-5p	hsa-let-7b-3p	hsa-miR-2277-5p
hsa-miR-181c-5p	hsa-miR-151a-5p	hsa-miR-377-3p	hsa-miR-10a-5p	hsa-miR-126-3p	hsa-let-7d-5p	hsa-miR-455-3p
hsa-miR-181d-5p	hsa-miR-222-3p	hsa-miR-136-5p	hsa-miR-100-5p	hsa-miR-369-5p	hsa-let-7e-5p	hsa-miR-23b-5p
hsa-miR-18a-5p	hsa-miR-486-5p	hsa-miR-374a-5p	hsa-miR-10b-5p	hsa-miR-16-5p	hsa-let-7a-5p	hsa-let-7b-5p
hsa-miR-196b-5p	hsa-miR-23b-3p	hsa-miR-29a-3p	hsa-miR-10b-3p	hsa-miR-24-3p	hsa-miR-196a-5p	hsa-miR-214-3p
hsa-miR-200a-5p	hsa-miR-125a-5p	hsa-miR-29b-3p	hsa-miR-145-3p	hsa-miR-3074-5p
hsa-miR-21-3p	hsa-miR-16-2-3p	hsa-miR-337-5p	hsa-miR-146b-5p
hsa-miR-21-5p	hsa-miR-127-3p	hsa-miR-331-3p
hsa-miR-218-5p	hsa-miR-339-5p	hsa-miR-3182
hsa-miR-2682-3p	hsa-miR-149-5p	hsa-miR-99a-5p
hsa-miR-2682-5p	hsa-miR-30c-5p	hsa-miR-140-5p
hsa-miR-27b-3p	hsa-miR-125b-5p	hsa-miR-34c-5p
hsa-miR-29c-3p	hsa-miR-93-3p
hsa-miR-30a-3p	hsa-miR-625-5p
hsa-miR-30a-5p	hsa-let-7d-3p
hsa-miR-30d-3p	hsa-miR-197-3p
hsa-miR-30e-3p	hsa-miR-574-3p
hsa-miR-30e-5p	hsa-miR-491-5p
hsa-miR-3118	hsa-miR-328-3p
hsa-miR-335-5p	hsa-miR-191-5p
hsa-miR-340-5p	hsa-miR-34b-3p
hsa-miR-34b-5p	hsa-miR-34c-3p
hsa-miR-3529-3p	hsa-miR-7977
hsa-miR-3613-5p	hsa-miR-15b-5p
hsa-miR-361-3p	hsa-miR-1260a
hsa-miR-374a-3p	hsa-miR-1260b
hsa-miR-374b-3p
hsa-miR-375
hsa-miR-376a-5p
hsa-miR-378c
hsa-miR-379-5p
hsa-miR-380-3p
hsa-miR-381-3p
hsa-miR-410-3p
hsa-miR-450a-5p
hsa-miR-450b-5p
hsa-miR-455-5p
hsa-miR-539-3p
hsa-miR-542-3p
hsa-miR-548a-3p
hsa-miR-548j-5p
hsa-miR-548n
hsa-miR-5701
hsa-miR-708-3p
hsa-miR-7-5p
hsa-miR-769-5p
hsa-miR-889-3p
