# Supplementary material for: Network-based analysis implies critical roles of microRNAs in the long-term cellular responses to gold nanoparticles
Source: Royal Society of Chemistry journal article supplement (doi:10.1039/d0nr04701e), 2020-01-01
Supplement: d0nr04701e2.xlsx [file d0nr04701e2.xlsx]

## Sheet: Hub miRNAs by module
Hub miRNAs	Module	kME	* In bold, hub miRNAs listed as differentially expressed in HDF cells exposed to AuNPs
hsa-miR-542-3p	Turquoise	0.972053
hsa-miR-374a-3p	Turquoise	0.948691
hsa-miR-148a-3p	Turquoise	0.942344
hsa-miR-340-5p	Turquoise	0.92954
hsa-miR-30e-5p	Turquoise	0.92641
hsa-miR-381-3p	Turquoise	0.926376
hsa-miR-21-5p	Turquoise	0.912407
hsa-miR-132-5p	Turquoise	0.901522
hsa-miR-889-3p	Turquoise	0.880741
hsa-miR-30e-3p	Turquoise	0.854937
hsa-miR-136-3p	Turquoise	0.849955
hsa-miR-450b-5p	Turquoise	0.845295
hsa-miR-410-3p	Turquoise	0.844888
hsa-miR-101-3p	Turquoise	0.840376
hsa-miR-21-3p	Turquoise	0.835855
hsa-miR-143-3p	Turquoise	0.821896
hsa-miR-181c-5p	Turquoise	0.820304
hsa-miR-539-3p	Turquoise	0.805124
hsa-let-7i-5p	Turquoise	0.801341
hsa-miR-379-5p	Turquoise	0.793316
hsa-miR-127-5p	Turquoise	0.767634
hsa-miR-450a-5p	Turquoise	0.750699
hsa-miR-30a-5p	Turquoise	0.747153
hsa-miR-3529-3p	Turquoise	0.74411
hsa-miR-7-5p	Turquoise	0.7394
hsa-miR-27b-3p	Turquoise	0.737756
hsa-miR-218-5p	Turquoise	0.726565
hsa-miR-200a-5p	Turquoise	0.720765
hsa-miR-30d-3p	Turquoise	0.711937
hsa-miR-1185-1-3p	Turquoise	0.707883
hsa-miR-2682-5p	Turquoise	0.701161
hsa-miR-125b-2-3p	Turquoise	0.697591
hsa-miR-455-5p	Turquoise	0.684159
hsa-miR-222-3p	Blue	0.918941
hsa-miR-34b-3p	Blue	0.91343
hsa-miR-328-3p	Blue	0.875669
hsa-miR-7977	Blue	0.875645
hsa-miR-1260b	Blue	0.874306
hsa-miR-1260a	Blue	0.870368
hsa-miR-486-5p	Blue	0.862265
hsa-miR-191-5p	Blue	0.860732
hsa-miR-125b-5p	Blue	0.852234
hsa-miR-197-3p	Blue	0.850057
hsa-miR-125a-5p	Blue	0.843724
hsa-miR-15b-5p	Blue	0.836609
hsa-miR-34c-3p	Blue	0.835929
hsa-miR-574-3p	Blue	0.812456
hsa-miR-491-5p	Blue	0.80977
hsa-miR-23b-3p	Blue	0.806031
hsa-miR-30c-5p	Blue	0.803765
hsa-miR-15b-3p	Blue	0.802692
hsa-miR-16-2-3p	Blue	0.798817
hsa-miR-625-5p	Blue	0.796178
hsa-miR-151a-5p	Blue	0.786286
hsa-miR-149-5p	Blue	0.780534
hsa-miR-339-5p	Blue	0.77528
hsa-miR-486-3p	Blue	0.75977
hsa-miR-615-3p	Blue	0.757592
hsa-miR-1249-3p	Blue	0.753812
hsa-miR-127-3p	Blue	0.743978
hsa-miR-26b-5p	Yellow	0.914299
hsa-miR-376a-3p	Yellow	0.914153
hsa-miR-146b-5p	Yellow	0.91349
hsa-miR-369-3p	Yellow	0.912943
hsa-miR-382-3p	Yellow	0.898366
hsa-miR-26a-5p	Yellow	0.897321
hsa-miR-10b-5p	Yellow	0.86655
hsa-miR-224-5p	Yellow	0.85486
hsa-miR-145-3p	Yellow	0.850556
hsa-miR-452-5p	Yellow	0.850225
hsa-miR-181a-5p	Yellow	0.836697
hsa-miR-30d-5p	Yellow	0.832685
hsa-miR-98-5p	Yellow	0.827233
hsa-miR-181b-5p	Yellow	0.81331
hsa-miR-10b-3p	Yellow	0.798476
hsa-miR-24-3p	Green	0.957548
hsa-miR-3074-5p	Green	0.950597
hsa-miR-22-3p	Green	0.928779
hsa-miR-16-5p	Green	0.913948
hsa-miR-339-3p	Green	0.900019
hsa-miR-345-5p	Green	0.857103
hsa-miR-369-5p	Green	0.842446
hsa-miR-214-5p	Green	0.839527
hsa-miR-31-5p	Green	0.821504
hsa-miR-425-5p	Green	0.809992
hsa-let-7i-3p	Green	0.804616
hsa-miR-126-3p	Green	0.800973
hsa-miR-411-5p	Green	0.796716
hsa-miR-196a-5p	Red	0.952573
hsa-let-7a-5p	Red	0.942937
hsa-let-7e-5p	Red	0.896275
hsa-miR-493-5p	Red	0.885131
hsa-miR-23a-5p	Red	0.870696
hsa-let-7d-5p	Red	0.83739
hsa-miR-132-3p	Red	0.818031
hsa-let-7f-5p	Red	0.817544
hsa-miR-432-5p	Red	0.805511
hsa-miR-1270	Red	0.797572
hsa-miR-574-5p	Red	0.790594
hsa-miR-99b-3p	Red	0.774537
hsa-miR-152-3p	Pink	0.945108
hsa-miR-1185-2-3p	Pink	0.841758
hsa-miR-34a-5p	Pink	0.82361
hsa-miR-148b-3p	Pink	0.823502
hsa-miR-140-3p	Pink	0.816615
hsa-miR-210-3p	Pink	0.786871
hsa-miR-532-5p	Pink	0.781915
hsa-miR-493-3p	Pink	0.771021
hsa-miR-320a	Magenta	0.967266
hsa-miR-320b	Magenta	0.944396
hsa-miR-155-5p	Magenta	0.898181
hsa-miR-424-3p	Magenta	0.871284
hsa-miR-382-5p	Magenta	0.859971
hsa-miR-221-3p	Magenta	0.818446
hsa-miR-320c	Magenta	0.814462
hsa-miR-1180-3p	Magenta	0.80899
hsa-miR-93-5p	Magenta	0.808719
hsa-miR-365a-3p	Purple	0.873894
hsa-miR-365b-3p	Purple	0.873894
hsa-miR-129-2-3p	Purple	0.773234
hsa-miR-655-3p	Purple	0.7722
hsa-miR-495-3p	Purple	0.76723
hsa-miR-193b-3p	Purple	0.723653
hsa-miR-376c-3p	Purple	0.721645
hsa-miR-103a-3p	Green yellow	0.835631
hsa-miR-103b	Green yellow	0.835631
hsa-miR-3120-5p	Green yellow	0.827375
hsa-miR-1301-3p	Green yellow	0.772083
hsa-miR-6724-5p	Green yellow	0.75846
hsa-miR-891a-5p	Green yellow	0.744847
hsa-miR-204-5p	Green yellow	0.735006
hsa-miR-195-3p	Green yellow	0.720283
hsa-miR-30b-5p	Salmon	0.946924
hsa-miR-24-2-5p	Salmon	0.837082
hsa-miR-199a-3p	Salmon	0.828497
hsa-miR-199b-3p	Salmon	0.828497
hsa-miR-454-3p	Salmon	0.800881
hsa-miR-1296-5p	Salmon	0.77399
hsa-miR-3913-5p	Midnight Blue	0.781824
hsa-miR-3913-3p	Midnight Blue	0.781824
hsa-miR-664b-5p	Midnight Blue	0.74494
hsa-miR-874-3p	Midnight Blue	0.689952
hsa-miR-3691-3p	Midnight Blue	0.682691
hsa-miR-625-3p	Light Cyan	0.917496
hsa-miR-99b-5p	Light Cyan	0.885454
hsa-miR-490-5p	Light Cyan	0.876982
hsa-miR-324-3p	Light Cyan	0.874254
hsa-miR-27b-5p	Light Cyan	0.852821
hsa-miR-146a-5p	Light Cyan	0.847848
