# Supplementary material for: Network-based analysis implies critical roles of microRNAs in the long-term cellular responses to gold nanoparticles
Source: Royal Society of Chemistry journal article supplement (doi:10.1039/d0nr04701e), 2020-01-01
Supplement: d0nr04701e3.xlsx [file d0nr04701e3.xlsx]

## Sheet: Turquoise
miRNA	Target Gene	EntrezID
hsa-let-7i-5p	ACP1	52
hsa-let-7i-5p	ADRB2	154
hsa-let-7i-5p	AMT	275
hsa-let-7i-5p	ATP6V1C1	528
hsa-let-7i-5p	CASP3	836
hsa-let-7i-5p	CD59	966
hsa-let-7i-5p	CDC34	997
hsa-let-7i-5p	CLCN5	1184
hsa-let-7i-5p	ABCC2	1244
hsa-let-7i-5p	COL1A2	1278
hsa-let-7i-5p	COL3A1	1281
hsa-let-7i-5p	DMD	1756
hsa-let-7i-5p	DNA2	1763
hsa-let-7i-5p	EDN1	1906
hsa-let-7i-5p	ERCC6	2074
hsa-let-7i-5p	ESR2	2100
hsa-let-7i-5p	GALNT1	2589
hsa-let-7i-5p	GATM	2628
hsa-let-7i-5p	GPR26	2849
hsa-let-7i-5p	HIP1	3092
hsa-let-7i-5p	HOXA1	3198
hsa-let-7i-5p	IGF1R	3480
hsa-let-7i-5p	MDM4	4194
hsa-let-7i-5p	NAP1L1	4673
hsa-let-7i-5p	NEK3	4752
hsa-let-7i-5p	NGF	4803
hsa-let-7i-5p	NRAS	4893
hsa-let-7i-5p	PBX3	5090
hsa-let-7i-5p	PIGA	5277
hsa-let-7i-5p	MAPK6	5597
hsa-let-7i-5p	MASP1	5648
hsa-let-7i-5p	PTAFR	5724
hsa-let-7i-5p	RAD9A	5883
hsa-let-7i-5p	RDX	5962
hsa-let-7i-5p	RNF5	6048
hsa-let-7i-5p	RPL36A	6173
hsa-let-7i-5p	SCD	6319
hsa-let-7i-5p	SLC20A1	6574
hsa-let-7i-5p	TGFBR1	7046
hsa-let-7i-5p	TGFBR3	7049
hsa-let-7i-5p	THRSP	7069
hsa-let-7i-5p	COL14A1	7373
hsa-let-7i-5p	UTRN	7402
hsa-let-7i-5p	PRDM2	7799
hsa-let-7i-5p	FZD3	7976
hsa-let-7i-5p	HMGA2	8091
hsa-let-7i-5p	GAN	8139
hsa-let-7i-5p	COIL	8161
hsa-let-7i-5p	SMC1A	8243
hsa-let-7i-5p	MAP4K3	8491
hsa-let-7i-5p	GAS7	8522
hsa-let-7i-5p	CYP4F2	8529
hsa-let-7i-5p	TNFSF10	8743
hsa-let-7i-5p	RIOK3	8780
hsa-let-7i-5p	ONECUT2	9480
hsa-let-7i-5p	IGDCC3	9543
hsa-let-7i-5p	TTLL4	9654
hsa-let-7i-5p	LRIG2	9860
hsa-let-7i-5p	LPGAT1	9926
hsa-let-7i-5p	GJC1	10052
hsa-let-7i-5p	ABCC5	10057
hsa-let-7i-5p	SERF2	10169
hsa-let-7i-5p	OLFM4	10562
hsa-let-7i-5p	IGF2BP1	10642
hsa-let-7i-5p	IGF2BP3	10643
hsa-let-7i-5p	IGF2BP2	10644
hsa-let-7i-5p	PGRMC1	10857
hsa-let-7i-5p	SUB1	10923
hsa-let-7i-5p	IFI44L	10964
hsa-let-7i-5p	SLC35D2	11046
hsa-let-7i-5p	ADAMTS8	11095
hsa-let-7i-5p	DDX19B	11269
hsa-let-7i-5p	FNDC3A	22862
hsa-let-7i-5p	HIC2	23119
hsa-let-7i-5p	FRMD4B	23150
hsa-let-7i-5p	CBX5	23468
hsa-let-7i-5p	AMACR	23600
hsa-let-7i-5p	TMEM2	23670
hsa-let-7i-5p	AHCTF1	25909
hsa-let-7i-5p	KIAA1429	25962
hsa-let-7i-5p	PARS2	25973
hsa-let-7i-5p	NPHP3	27031
hsa-let-7i-5p	A1CF	29974
hsa-let-7i-5p	PLA2G3	50487
hsa-let-7i-5p	CPA4	51200
hsa-let-7i-5p	GCNT4	51301
hsa-let-7i-5p	NAA38	51691
hsa-let-7i-5p	CCNJ	54619
hsa-let-7i-5p	ARHGEF38	54848
hsa-let-7i-5p	PDPR	55066
hsa-let-7i-5p	PRPF38B	55119
hsa-let-7i-5p	FIGN	55137
hsa-let-7i-5p	DDX19A	55308
hsa-let-7i-5p	YOD1	55432
hsa-let-7i-5p	HIF1AN	55662
hsa-let-7i-5p	FAM178A	55719
hsa-let-7i-5p	CRTAM	56253
hsa-let-7i-5p	CTPS2	56474
hsa-let-7i-5p	SMARCAD1	56916
hsa-let-7i-5p	SPRYD7	57213
hsa-let-7i-5p	MRS2	57380
hsa-let-7i-5p	ODF2L	57489
hsa-let-7i-5p	STARD9	57519
hsa-let-7i-5p	IFT80	57560
hsa-let-7i-5p	SNX16	64089
hsa-let-7i-5p	CPEB1	64506
hsa-let-7i-5p	SRD5A3	79644
hsa-let-7i-5p	THAP9	79725
hsa-let-7i-5p	C12orf49	79794
hsa-let-7i-5p	DOK3	79930
hsa-let-7i-5p	OPA3	80207
hsa-let-7i-5p	MED28	80306
hsa-let-7i-5p	ZBP1	81030
hsa-let-7i-5p	SYNC	81493
hsa-let-7i-5p	ATG10	83734
hsa-let-7i-5p	RGPD5	84220
hsa-let-7i-5p	ZCCHC9	84240
hsa-let-7i-5p	DDI2	84301
hsa-let-7i-5p	PPAPDC1B	84513
hsa-let-7i-5p	PLEKHA8	84725
hsa-let-7i-5p	ZNF341	84905
hsa-let-7i-5p	PPP1R15B	84919
hsa-let-7i-5p	SMIM3	85027
hsa-let-7i-5p	SDR42E1	93517
hsa-let-7i-5p	TRMT10A	93587
hsa-let-7i-5p	FOXP2	93986
hsa-let-7i-5p	MED8	112950
hsa-let-7i-5p	UHRF2	115426
hsa-let-7i-5p	LRIG3	121227
hsa-let-7i-5p	C14orf28	122525
hsa-let-7i-5p	SOCS4	122809
hsa-let-7i-5p	ACVR1C	130399
hsa-let-7i-5p	TRIM71	131405
hsa-let-7i-5p	CD200R1	131450
hsa-let-7i-5p	EMB	133418
hsa-let-7i-5p	HDX	139324
hsa-let-7i-5p	ZNF583	147949
hsa-let-7i-5p	MFSD4	148808
hsa-let-7i-5p	TMEM167A	153339
hsa-let-7i-5p	SLC5A9	200010
hsa-let-7i-5p	MMS22L	253714
hsa-let-7i-5p	KCTD21	283219
hsa-let-7i-5p	PRTG	283659
hsa-let-7i-5p	C3orf38	285237
hsa-let-7i-5p	RPUSD3	285367
hsa-let-7i-5p	RSPO2	340419
hsa-let-7i-5p	LIN28B	389421
hsa-let-7i-5p	GDF6	392255
hsa-let-7i-5p	FIGNL2	401720
hsa-let-7i-5p	PLEKHG7	440107
hsa-let-7i-5p	C8orf58	541565
hsa-let-7i-5p	POTEM	641455
hsa-let-7i-5p	RGPD8	727851
hsa-let-7i-5p	RGPD6	729540
hsa-let-7i-5p	DDTL	100037417
hsa-let-7i-5p	SIGLEC14	100049587
hsa-let-7i-5p	TLR4	7099
hsa-let-7i-5p	SOCS1	8651
hsa-let-7i-5p	IL13	3596
hsa-let-7i-5p	COPS8	10920
hsa-let-7i-5p	COPS6	10980
hsa-let-7i-5p	GPS1	2873
hsa-let-7i-5p	BMP4	652
hsa-let-7i-5p	IGF1	3479
hsa-let-7i-5p	AGO1	26523
hsa-let-7i-5p	NEUROG1	4762
hsa-let-7i-5p	ASCL1	429
hsa-let-7i-5p	IL2	3558
hsa-let-7i-5p	AURKB	9212
hsa-miR-101-3p	ACVR2B	93
hsa-miR-101-3p	ADRB1	153
hsa-miR-101-3p	AGA	175
hsa-miR-101-3p	APP	351
hsa-miR-101-3p	ATP2B2	491
hsa-miR-101-3p	BCL9	607
hsa-miR-101-3p	ZFP36L2	678
hsa-miR-101-3p	CACNB2	783
hsa-miR-101-3p	CALD1	800
hsa-miR-101-3p	CAV3	859
hsa-miR-101-3p	CCNT2	905
hsa-miR-101-3p	CD86	942
hsa-miR-101-3p	CDH5	1003
hsa-miR-101-3p	AP3S1	1176
hsa-miR-101-3p	COL10A1	1300
hsa-miR-101-3p	CSRP2	1466
hsa-miR-101-3p	CTNND2	1501
hsa-miR-101-3p	DNMT3A	1788
hsa-miR-101-3p	DR1	1810
hsa-miR-101-3p	DUSP1	1843
hsa-miR-101-3p	ELF5	2001
hsa-miR-101-3p	EMP1	2012
hsa-miR-101-3p	EMP2	2013
hsa-miR-101-3p	EYA1	2138
hsa-miR-101-3p	EZH2	2146
hsa-miR-101-3p	FBN2	2201
hsa-miR-101-3p	FKTN	2218
hsa-miR-101-3p	FGA	2243
hsa-miR-101-3p	FOS	2353
hsa-miR-101-3p	FUCA2	2519
hsa-miR-101-3p	GAB1	2549
hsa-miR-101-3p	GCNT1	2650
hsa-miR-101-3p	GFRA1	2674
hsa-miR-101-3p	GJA1	2697
hsa-miR-101-3p	GCLC	2729
hsa-miR-101-3p	GRIN2A	2903
hsa-miR-101-3p	HNRNPF	3185
hsa-miR-101-3p	FOXN2	3344
hsa-miR-101-3p	IL16	3603
hsa-miR-101-3p	ITGA2	3673
hsa-miR-101-3p	KCNA1	3736
hsa-miR-101-3p	KCNN3	3782
hsa-miR-101-3p	KIF2A	3796
hsa-miR-101-3p	KIF5B	3799
hsa-miR-101-3p	KIF11	3832
hsa-miR-101-3p	KPNB1	3837
hsa-miR-101-3p	TNPO1	3842
hsa-miR-101-3p	STMN1	3925
hsa-miR-101-3p	LBR	3930
hsa-miR-101-3p	LIMS1	3987
hsa-miR-101-3p	LRP2	4036
hsa-miR-101-3p	MXD1	4084
hsa-miR-101-3p	MAK	4117
hsa-miR-101-3p	MAP4	4134
hsa-miR-101-3p	MBNL1	4154
hsa-miR-101-3p	MITF	4286
hsa-miR-101-3p	MYCN	4613
hsa-miR-101-3p	NACA	4666
hsa-miR-101-3p	NAGLU	4669
hsa-miR-101-3p	NEUROD1	4760
hsa-miR-101-3p	NF1	4763
hsa-miR-101-3p	NONO	4841
hsa-miR-101-3p	NOVA1	4857
hsa-miR-101-3p	NPHS1	4868
hsa-miR-101-3p	PAFAH1B1	5048
hsa-miR-101-3p	PDE4D	5144
hsa-miR-101-3p	PGR	5241
hsa-miR-101-3p	PKD2	5311
hsa-miR-101-3p	PLD1	5337
hsa-miR-101-3p	PLXNA2	5362
hsa-miR-101-3p	POLH	5429
hsa-miR-101-3p	POLR2B	5431
hsa-miR-101-3p	POU2F1	5451
hsa-miR-101-3p	PPM1A	5494
hsa-miR-101-3p	PPP1R2	5504
hsa-miR-101-3p	PRKAA1	5562
hsa-miR-101-3p	PRKCE	5581
hsa-miR-101-3p	PRKX	5613
hsa-miR-101-3p	PSMA5	5686
hsa-miR-101-3p	PURB	5814
hsa-miR-101-3p	PVR	5817
hsa-miR-101-3p	RAB1A	5861
hsa-miR-101-3p	RAB4A	5867
hsa-miR-101-3p	RAB5A	5868
hsa-miR-101-3p	RAB27A	5873
hsa-miR-101-3p	RAP1B	5908
hsa-miR-101-3p	RCN2	5955
hsa-miR-101-3p	REV3L	5980
hsa-miR-101-3p	RFX4	5992
hsa-miR-101-3p	ROBO2	6092
hsa-miR-101-3p	RORA	6095
hsa-miR-101-3p	RORB	6096
hsa-miR-101-3p	RRM1	6240
hsa-miR-101-3p	RXRB	6257
hsa-miR-101-3p	RYR3	6263
hsa-miR-101-3p	ATXN1	6310
hsa-miR-101-3p	SCN2A	6326
hsa-miR-101-3p	CXCL6	6372
hsa-miR-101-3p	SEL1L	6400
hsa-miR-101-3p	SLC1A1	6505
hsa-miR-101-3p	SLC12A2	6558
hsa-miR-101-3p	SMARCA1	6594
hsa-miR-101-3p	SMARCD1	6602
hsa-miR-101-3p	SOX9	6662
hsa-miR-101-3p	SP2	6668
hsa-miR-101-3p	SRPK2	6733
hsa-miR-101-3p	STAR	6770
hsa-miR-101-3p	STC1	6781
hsa-miR-101-3p	HSPA13	6782
hsa-miR-101-3p	NEK4	6787
hsa-miR-101-3p	SYT4	6860
hsa-miR-101-3p	TAL1	6886
hsa-miR-101-3p	TCEB1	6921
hsa-miR-101-3p	TCF4	6925
hsa-miR-101-3p	ZEB1	6935
hsa-miR-101-3p	TDG	6996
hsa-miR-101-3p	TGFBR1	7046
hsa-miR-101-3p	TGFBR3	7049
hsa-miR-101-3p	TLR2	7097
hsa-miR-101-3p	TSPAN6	7105
hsa-miR-101-3p	UBE2A	7319
hsa-miR-101-3p	UBE2D1	7321
hsa-miR-101-3p	UBE2D2	7322
hsa-miR-101-3p	UBE2G1	7326
hsa-miR-101-3p	VHL	7428
hsa-miR-101-3p	ZNF33A	7581
hsa-miR-101-3p	ZNF33B	7582
hsa-miR-101-3p	ZNF143	7702
hsa-miR-101-3p	ZMYM2	7750
hsa-miR-101-3p	ZNF217	7764
hsa-miR-101-3p	EVI5	7813
hsa-miR-101-3p	ST7	7982
hsa-miR-101-3p	ARID1A	8289
hsa-miR-101-3p	FZD6	8323
hsa-miR-101-3p	CUL3	8452
hsa-miR-101-3p	SMARCA5	8467
hsa-miR-101-3p	PPFIA1	8500
hsa-miR-101-3p	NAPG	8774
hsa-miR-101-3p	DCAF5	8816
hsa-miR-101-3p	NRP1	8829
hsa-miR-101-3p	WISP1	8840
hsa-miR-101-3p	MTMR2	8898
hsa-miR-101-3p	MTMR7	9108
hsa-miR-101-3p	CBFA2T2	9139
hsa-miR-101-3p	TMEM257	9142
hsa-miR-101-3p	MAGI1	9223
hsa-miR-101-3p	CD163	9332
hsa-miR-101-3p	NDST3	9348
hsa-miR-101-3p	CDYL	9425
hsa-miR-101-3p	QKI	9444
hsa-miR-101-3p	MED20	9477
hsa-miR-101-3p	ADAMTS3	9508
hsa-miR-101-3p	PMPCB	9512
hsa-miR-101-3p	ARHGEF10	9639
hsa-miR-101-3p	MTFR1	9650
hsa-miR-101-3p	SOCS5	9655
hsa-miR-101-3p	PHACTR2	9749
hsa-miR-101-3p	CEP350	9857
hsa-miR-101-3p	ZBED4	9889
hsa-miR-101-3p	SUPT7L	9913
hsa-miR-101-3p	ZBTB5	9925
hsa-miR-101-3p	NR1D2	9975
hsa-miR-101-3p	ZBTB33	10009
hsa-miR-101-3p	SH2B3	10019
hsa-miR-101-3p	RANBP9	10048
hsa-miR-101-3p	ABCC5	10057
hsa-miR-101-3p	CTDSPL	10217
hsa-miR-101-3p	TRIB1	10221
hsa-miR-101-3p	DCAF7	10238
hsa-miR-101-3p	TIMM17A	10440
hsa-miR-101-3p	SYNCRIP	10492
hsa-miR-101-3p	SLC19A2	10560
hsa-miR-101-3p	EXOC5	10640
hsa-miR-101-3p	CELF2	10659
hsa-miR-101-3p	MAP3K2	10746
hsa-miR-101-3p	SUB1	10923
hsa-miR-101-3p	ASCC3	10973
hsa-miR-101-3p	VAX1	11023
hsa-miR-101-3p	CYB561D2	11068
hsa-miR-101-3p	DIDO1	11083
hsa-miR-101-3p	NUPL2	11097
hsa-miR-101-3p	KIF3A	11127
hsa-miR-101-3p	AKAP11	11215
hsa-miR-101-3p	MGAT4A	11320
hsa-miR-101-3p	IKZF2	22807
hsa-miR-101-3p	PHLDA1	22822
hsa-miR-101-3p	ICK	22858
hsa-miR-101-3p	BTBD3	22903
hsa-miR-101-3p	SACM1L	22908
hsa-miR-101-3p	DIP2C	22982
hsa-miR-101-3p	MON2	23041
hsa-miR-101-3p	PDS5B	23047
hsa-miR-101-3p	TNRC6B	23112
hsa-miR-101-3p	FAM179B	23116
hsa-miR-101-3p	GRAMD4	23151
hsa-miR-101-3p	METAP1	23173
hsa-miR-101-3p	TBC1D12	23232
hsa-miR-101-3p	ANKRD28	23243
hsa-miR-101-3p	KIAA0556	23247
hsa-miR-101-3p	OTUD3	23252
hsa-miR-101-3p	SOGA2	23255
hsa-miR-101-3p	CAMTA1	23261
hsa-miR-101-3p	FBXW11	23291
hsa-miR-101-3p	BICD2	23299
hsa-miR-101-3p	DMXL2	23312
hsa-miR-101-3p	SASH1	23328
hsa-miR-101-3p	PUM2	23369
hsa-miR-101-3p	PIP5K1C	23396
hsa-miR-101-3p	COTL1	23406
hsa-miR-101-3p	RASD2	23551
hsa-miR-101-3p	ARL2BP	23568
hsa-miR-101-3p	SSBP2	23635
hsa-miR-101-3p	SLC7A11	23657
hsa-miR-101-3p	PRKD3	23683
hsa-miR-101-3p	FLRT3	23767
hsa-miR-101-3p	FLRT2	23768
hsa-miR-101-3p	TFIP11	24144
hsa-miR-101-3p	RAB3GAP2	25782
hsa-miR-101-3p	SULT4A1	25830
hsa-miR-101-3p	MOB4	25843
hsa-miR-101-3p	MYRIP	25924
hsa-miR-101-3p	ZNF451	26036
hsa-miR-101-3p	ANKRD17	26057
hsa-miR-101-3p	RSL1D1	26156
hsa-miR-101-3p	TIAM2	26230
hsa-miR-101-3p	MRPL42	28977
hsa-miR-101-3p	ANKRD11	29123
hsa-miR-101-3p	GLTSCR1	29998
hsa-miR-101-3p	VSX1	30813
hsa-miR-101-3p	ARHGEF3	50650
hsa-miR-101-3p	SLMO2	51012
hsa-miR-101-3p	ABHD17B	51104
hsa-miR-101-3p	POMP	51371
hsa-miR-101-3p	NLK	51701
hsa-miR-101-3p	SIX4	51804
hsa-miR-101-3p	CNTN5	53942
hsa-miR-101-3p	GPR85	54329
hsa-miR-101-3p	RIN2	54453
hsa-miR-101-3p	TMCO1	54499
hsa-miR-101-3p	ING3	54556
hsa-miR-101-3p	PDP1	54704
hsa-miR-101-3p	OTUD4	54726
hsa-miR-101-3p	TET2	54790
hsa-miR-101-3p	ASPN	54829
hsa-miR-101-3p	MFSD6	54842
hsa-miR-101-3p	ZCCHC2	54877
hsa-miR-101-3p	INO80D	54891
hsa-miR-101-3p	USP47	55031
hsa-miR-101-3p	AGGF1	55109
hsa-miR-101-3p	THAP1	55145
hsa-miR-101-3p	MTPAP	55149
hsa-miR-101-3p	LGI2	55203
hsa-miR-101-3p	ZNF532	55205
hsa-miR-101-3p	BBS7	55212
hsa-miR-101-3p	ZNF654	55279
hsa-miR-101-3p	ETNK1	55500
hsa-miR-101-3p	CHST12	55501
hsa-miR-101-3p	DHTKD1	55526
hsa-miR-101-3p	FAM46A	55603
hsa-miR-101-3p	N4BP2	55728
hsa-miR-101-3p	FAM222B	55731
hsa-miR-101-3p	PARVA	55742
hsa-miR-101-3p	TRERF1	55809
hsa-miR-101-3p	BDP1	55814
hsa-miR-101-3p	ERBB2IP	55914
hsa-miR-101-3p	PCDHB14	56122
hsa-miR-101-3p	ERO1LB	56605
hsa-miR-101-3p	EIF5A2	56648
hsa-miR-101-3p	UGGT1	56886
hsa-miR-101-3p	FEM1C	56929
hsa-miR-101-3p	ARNTL2	56938
hsa-miR-101-3p	ENY2	56943
hsa-miR-101-3p	BBX	56987
hsa-miR-101-3p	TULP4	56995
hsa-miR-101-3p	PHTF2	57157
hsa-miR-101-3p	SLC39A10	57181
hsa-miR-101-3p	ADAMTSL3	57188
hsa-miR-101-3p	CYP20A1	57404
hsa-miR-101-3p	PLEKHG1	57480
hsa-miR-101-3p	AHRR	57491
hsa-miR-101-3p	MKL2	57496
hsa-miR-101-3p	KIAA1377	57562
hsa-miR-101-3p	BEGAIN	57596
hsa-miR-101-3p	KIAA1462	57608
hsa-miR-101-3p	DIP2B	57609
hsa-miR-101-3p	TSHZ3	57616
hsa-miR-101-3p	LRCH2	57631
hsa-miR-101-3p	LRRN1	57633
hsa-miR-101-3p	POGK	57645
hsa-miR-101-3p	EPB41L5	57669
hsa-miR-101-3p	ZSWIM6	57688
hsa-miR-101-3p	RAP2C	57826
hsa-miR-101-3p	ABHD17C	58489
hsa-miR-101-3p	RBM25	58517
hsa-miR-101-3p	HIVEP3	59269
hsa-miR-101-3p	ZNF350	59348
hsa-miR-101-3p	PROK2	60675
hsa-miR-101-3p	ZFAND3	60685
hsa-miR-101-3p	C17orf75	64149
hsa-miR-101-3p	TFB2M	64216
hsa-miR-101-3p	NSD1	64324
hsa-miR-101-3p	IKZF4	64375
hsa-miR-101-3p	ZMAT3	64393
hsa-miR-101-3p	CLEC7A	64581
hsa-miR-101-3p	UNKL	64718
hsa-miR-101-3p	TNS3	64759
hsa-miR-101-3p	PAPOLG	64895
hsa-miR-101-3p	RAPH1	65059
hsa-miR-101-3p	MPPE1	65258
hsa-miR-101-3p	ZNF557	79230
hsa-miR-101-3p	METTL21D	79609
hsa-miR-101-3p	PANK3	79646
hsa-miR-101-3p	ZFHX4	79776
hsa-miR-101-3p	VASH2	79805
hsa-miR-101-3p	PEAK1	79834
hsa-miR-101-3p	C10orf88	80007
hsa-miR-101-3p	NAA15	80155
hsa-miR-101-3p	SPG11	80208
hsa-miR-101-3p	CEP63	80254
hsa-miR-101-3p	TNKS2	80351
hsa-miR-101-3p	NDFIP1	80762
hsa-miR-101-3p	NETO1	81832
hsa-miR-101-3p	TM2D2	83877
hsa-miR-101-3p	CTTNBP2	83992
hsa-miR-101-3p	LCOR	84458
hsa-miR-101-3p	KBTBD8	84541
hsa-miR-101-3p	C8orf76	84933
hsa-miR-101-3p	KCNH7	90134
hsa-miR-101-3p	FMNL3	91010
hsa-miR-101-3p	FAM114A1	92689
hsa-miR-101-3p	MMGT1	93380
hsa-miR-101-3p	ARHGAP18	93663
hsa-miR-101-3p	HTRA3	94031
hsa-miR-101-3p	H2AFV	94239
hsa-miR-101-3p	KTI12	112970
hsa-miR-101-3p	GLCCI1	113263
hsa-miR-101-3p	TRIM9	114088
hsa-miR-101-3p	ESCO1	114799
hsa-miR-101-3p	ZNF618	114991
hsa-miR-101-3p	RAB39B	116442
hsa-miR-101-3p	ARAP2	116984
hsa-miR-101-3p	AGAP1	116987
hsa-miR-101-3p	SSX2IP	117178
hsa-miR-101-3p	MORN4	118812
hsa-miR-101-3p	FAT3	120114
hsa-miR-101-3p	TMEM132D	121256
hsa-miR-101-3p	KLHDC1	122773
hsa-miR-101-3p	MAB21L3	126868
hsa-miR-101-3p	UHMK1	127933
hsa-miR-101-3p	AP1S3	130340
hsa-miR-101-3p	DCBLD2	131566
hsa-miR-101-3p	PPARGC1B	133522
hsa-miR-101-3p	STXBP5	134957
hsa-miR-101-3p	NEK7	140609
hsa-miR-101-3p	UBE2F	140739
hsa-miR-101-3p	MPP7	143098
hsa-miR-101-3p	PRICKLE1	144165
hsa-miR-101-3p	BEAN1	146227
hsa-miR-101-3p	RUNDC1	146923
hsa-miR-101-3p	C1orf52	148423
hsa-miR-101-3p	B3GALNT2	148789
hsa-miR-101-3p	SLC30A7	148867
hsa-miR-101-3p	PPM1L	151742
hsa-miR-101-3p	RNF38	152006
hsa-miR-101-3p	CREBRF	153222
hsa-miR-101-3p	ZNF746	155061
hsa-miR-101-3p	RBM33	155435
hsa-miR-101-3p	TMEM65	157378
hsa-miR-101-3p	FREM1	158326
hsa-miR-101-3p	FAM122C	159091
hsa-miR-101-3p	TMTC3	160418
hsa-miR-101-3p	PPTC7	160760
hsa-miR-101-3p	DENND1B	163486
hsa-miR-101-3p	LONRF2	164832
hsa-miR-101-3p	SGMS2	166929
hsa-miR-101-3p	ADAMTS17	170691
hsa-miR-101-3p	PIKFYVE	200576
hsa-miR-101-3p	C9orf72	203228
hsa-miR-101-3p	C3orf58	205428
hsa-miR-101-3p	SLC36A1	206358
hsa-miR-101-3p	AMER2	219287
hsa-miR-101-3p	ZNRF2	223082
hsa-miR-101-3p	IPMK	253430
hsa-miR-101-3p	CADM2	253559
hsa-miR-101-3p	ZDHHC20	253832
hsa-miR-101-3p	UBN2	254048
hsa-miR-101-3p	LCORL	254251
hsa-miR-101-3p	NPNT	255743
hsa-miR-101-3p	GLIPR1L1	256710
hsa-miR-101-3p	SVIP	258010
hsa-miR-101-3p	JAKMIP3	282973
hsa-miR-101-3p	DPY19L2	283417
hsa-miR-101-3p	ZIK1	284307
hsa-miR-101-3p	ZNF493	284443
hsa-miR-101-3p	SREK1IP1	285672
hsa-miR-101-3p	SCAI	286205
hsa-miR-101-3p	FAM78A	286336
hsa-miR-101-3p	C1orf110	339512
hsa-miR-101-3p	ZDHHC21	340481
hsa-miR-101-3p	KIAA2022	340533
hsa-miR-101-3p	SYT10	341359
hsa-miR-101-3p	ATXN1L	342371
hsa-miR-101-3p	MTX3	345778
hsa-miR-101-3p	LANCL3	347404
hsa-miR-101-3p	AMIGO2	347902
hsa-miR-101-3p	ZBTB41	360023
hsa-miR-101-3p	FAM73A	374986
hsa-miR-101-3p	MAST4	375449
hsa-miR-101-3p	RAB15	376267
hsa-miR-101-3p	CEP85L	387119
hsa-miR-101-3p	NHLRC3	387921
hsa-miR-101-3p	SHISA6	388336
hsa-miR-101-3p	LIN28B	389421
hsa-miR-101-3p	ZBTB34	403341
hsa-miR-101-3p	RFPL4B	442247
hsa-miR-101-3p	C18orf56	494514
hsa-miR-101-3p	FAM110C	642273
hsa-miR-101-3p	FAM227A	646851
hsa-miR-101-3p	TMEM170B	100113407
hsa-miR-101-3p	TMEM194B	100131211
hsa-miR-101-3p	KLLN	100144748
hsa-miR-101-3p	HSPE1-MOB4	100529241
hsa-miR-101-3p	MCL1	4170
hsa-miR-101-3p	COX2	4513
hsa-miR-101-3p	EED	8726
hsa-miR-101-3p	PTGS2	5743
hsa-miR-101-3p	ATM	472
hsa-miR-101-3p	ATP5B	506
hsa-miR-101-3p	ATG4D	84971
hsa-miR-101-3p	FMR1	2332
hsa-miR-101-3p	VEGFA	7422
hsa-miR-101-3p	RAC1	5879
hsa-miR-101-3p	MEIS1	4211
hsa-miR-101-3p	PTGER4	5734
hsa-miR-101-3p	CPEB1	64506
hsa-miR-101-3p	MTOR	2475
hsa-miR-101-3p	CFTR	1080
hsa-miR-101-3p	KLF6	1316
hsa-miR-101-3p	ZEB2	9839
hsa-miR-101-3p	PIM1	5292
hsa-miR-101-3p	JAK2	3717
hsa-miR-101-3p	MET	4233
hsa-miR-101-3p	PRDM1	639
hsa-miR-101-3p	VEGFC	7424
hsa-miR-101-3p	PIK3CB	5291
hsa-miR-101-3p	NOTCH1	4851
hsa-miR-101-3p	PRKAB1	5564
hsa-miR-101-3p	RHOA	387
hsa-miR-101-3p	SRF	6722
hsa-miR-101-3p	RUNX1	861
hsa-miR-101-3p	CDK8	1024
hsa-miR-101-3p	CTNNB1	1499
hsa-miR-101-3p	CCND1	595
hsa-miR-101-3p	SNHG1	23642
hsa-miR-101-3p	GRSF1	2926
hsa-miR-101-3p	ITGA3	3675
hsa-miR-1185-1-3p	GSTCD	79807
hsa-miR-1185-1-3p	C20orf112	140688
hsa-miR-1185-1-3p	DEPDC5	9681
hsa-miR-1185-1-3p	NXT2	55916
hsa-miR-1185-1-3p	PHLDA1	22822
hsa-miR-1185-1-3p	SRSF12	135295
hsa-miR-1185-1-3p	ATXN3	4287
hsa-miR-1185-1-3p	SORT1	6272
hsa-miR-1185-1-3p	PRKAG2	51422
hsa-miR-1185-1-3p	KLF5	688
hsa-miR-1185-1-3p	KCMF1	56888
hsa-miR-1185-1-3p	NOS1	4842
hsa-miR-1185-1-3p	SMARCA4	6597
hsa-miR-1185-1-3p	SPAG9	9043
hsa-miR-1185-1-3p	FXR1	8087
hsa-miR-1185-1-3p	CYP24A1	1591
hsa-miR-1185-1-3p	DSTYK	25778
hsa-miR-1185-1-3p	MASTL	84930
hsa-miR-1185-1-3p	MAGI3	260425
hsa-miR-1185-1-3p	AKAP9	10142
hsa-miR-1185-1-3p	ALG9	79796
hsa-miR-1185-1-3p	LDLR	3949
hsa-miR-1185-1-3p	MOB4	25843
hsa-miR-1185-1-3p	FAM126B	285172
hsa-miR-1185-1-3p	PHKA1	5255
hsa-miR-1185-1-3p	SLC6A15	55117
hsa-miR-1185-1-3p	NR3C1	2908
hsa-miR-1185-1-3p	FNDC3B	64778
hsa-miR-1185-1-3p	SGCD	6444
hsa-miR-1185-1-3p	TGFBR3	7049
hsa-miR-1185-1-3p	ATRX	546
hsa-miR-1185-1-3p	IRX5	10265
hsa-miR-1185-1-3p	PREPL	9581
hsa-miR-1185-1-3p	GABRA1	2554
hsa-miR-1185-1-3p	AGGF1	55109
hsa-miR-1185-1-3p	MBNL3	55796
hsa-miR-1185-1-3p	IRS1	3667
hsa-miR-1185-1-3p	TFAP2A	7020
hsa-miR-1185-1-3p	VCAM1	7412
hsa-miR-1185-1-3p	UQCRB	7381
hsa-miR-1185-1-3p	KRIT1	889
hsa-miR-1185-1-3p	PDCD10	11235
hsa-miR-1185-1-3p	DOCK8	81704
hsa-miR-1185-1-3p	TOR1AIP2	163590
hsa-miR-1185-1-3p	BCLAF1	9774
hsa-miR-1185-1-3p	ZNF248	57209
hsa-miR-1185-1-3p	MGRN1	23295
hsa-miR-1185-1-3p	TMEM161B	153396
hsa-miR-1185-1-3p	NASP	4678
hsa-miR-1185-1-3p	SET	6418
hsa-miR-1185-1-3p	PANK1	53354
hsa-miR-1185-1-3p	VCAN	1462
hsa-miR-1185-1-3p	PLEKHG1	57480
hsa-miR-1185-1-3p	POU4F2	5458
hsa-miR-1185-1-3p	TCF7L2	6934
hsa-miR-1185-1-3p	ANK3	288
hsa-miR-1185-1-3p	RBM39	9584
hsa-miR-1185-1-3p	B3GALNT1	8706
hsa-miR-1185-1-3p	ERBB4	2066
hsa-miR-1185-1-3p	PCLO	27445
hsa-miR-1185-1-3p	FNIP1	96459
hsa-miR-1185-1-3p	ILDR1	286676
hsa-miR-1185-1-3p	STAG2	10735
hsa-miR-1185-1-3p	ARID5B	84159
hsa-miR-1185-1-3p	MBNL1	4154
hsa-miR-1185-1-3p	AFF4	27125
hsa-miR-1185-1-3p	RGPD8	727851
hsa-miR-1185-1-3p	PTPN3	5774
hsa-miR-1185-1-3p	RASSF8	11228
hsa-miR-1185-1-3p	CEP41	95681
hsa-miR-1185-1-3p	MECP2	4204
hsa-miR-1185-1-3p	CLEC2D	29121
hsa-miR-1185-1-3p	RGS4	5999
hsa-miR-1185-1-3p	SOCS7	30837
hsa-miR-1185-1-3p	ABCA1	19
hsa-miR-1185-1-3p	LMO3	55885
hsa-miR-1185-1-3p	MEOX2	4223
hsa-miR-1185-1-3p	SLC14A1	6563
hsa-miR-1185-1-3p	B3GALT2	8707
hsa-miR-1185-1-3p	WT1	7490
hsa-miR-1185-1-3p	CR2	1380
hsa-miR-1185-1-3p	PUM2	23369
hsa-miR-1185-1-3p	GUCY1A3	2982
hsa-miR-1185-1-3p	SEMA3D	223117
hsa-miR-1185-1-3p	CASP8AP2	9994
hsa-miR-1185-1-3p	NFKBIZ	64332
hsa-miR-1185-1-3p	IRF5	3663
hsa-miR-1185-1-3p	BACE1	23621
hsa-miR-1185-1-3p	ZCCHC24	219654
hsa-miR-1185-1-3p	PAH	5053
hsa-miR-1185-1-3p	ESRP1	54845
hsa-miR-1185-1-3p	ACSL3	2181
hsa-miR-1185-1-3p	KMT2C	58508
hsa-miR-1185-1-3p	RAP2B	5912
hsa-miR-1185-1-3p	ASPH	444
hsa-miR-1185-1-3p	ENAM	10117
hsa-miR-1185-1-3p	TRIP4	9325
hsa-miR-1185-1-3p	FGF13	2258
hsa-miR-1185-1-3p	ARID4B	51742
hsa-miR-1185-1-3p	ICA1L	130026
hsa-miR-1185-1-3p	LOC100127983	100127983
hsa-miR-1185-1-3p	WDR60	55112
hsa-miR-1185-1-3p	CSPP1	79848
hsa-miR-1185-1-3p	DUSP19	142679
hsa-miR-1185-1-3p	GNG12	55970
hsa-miR-1185-1-3p	ZNF652	22834
hsa-miR-1185-1-3p	CLDN23	137075
hsa-miR-1185-1-3p	DAGLA	747
hsa-miR-1185-1-3p	MDM1	56890
hsa-miR-1185-1-3p	NOVA2	4858
hsa-miR-1185-1-3p	SNCA	6622
hsa-miR-1185-1-3p	UNC119	9094
hsa-miR-1185-1-3p	RAB3GAP2	25782
hsa-miR-1185-1-3p	NUDCD1	84955
hsa-miR-1185-1-3p	JAKMIP3	282973
hsa-miR-1185-1-3p	SLC35E1	79939
hsa-miR-1185-1-3p	SCAI	286205
hsa-miR-1185-1-3p	PMAIP1	5366
hsa-miR-1185-1-3p	RNF220	55182
hsa-miR-1185-1-3p	GSK3B	2932
hsa-miR-1185-1-3p	TMEM135	65084
hsa-miR-1185-1-3p	SLC1A2	6506
hsa-miR-1185-1-3p	ST3GAL6	10402
hsa-miR-1185-1-3p	ITGA2	3673
hsa-miR-1185-1-3p	TFDP2	7029
hsa-miR-1185-1-3p	VCL	7414
hsa-miR-1185-1-3p	USP1	7398
hsa-miR-1185-1-3p	CALN1	83698
hsa-miR-1185-1-3p	TXLNB	167838
hsa-miR-1185-1-3p	GPR126	57211
hsa-miR-1185-1-3p	ALDH1L2	160428
hsa-miR-1185-1-3p	C21orf91	54149
hsa-miR-1185-1-3p	CYP19A1	1588
hsa-miR-1185-1-3p	ZNF608	57507
hsa-miR-1185-1-3p	PPP2CB	5516
hsa-miR-1185-1-3p	CTR9	9646
hsa-miR-1185-1-3p	TSC22D1	8848
hsa-miR-1185-1-3p	EYA4	2070
hsa-miR-1185-1-3p	DNAJC15	29103
hsa-miR-1185-1-3p	SLC2A13	114134
hsa-miR-1185-1-3p	CCDC39	339829
hsa-miR-1185-1-3p	FAXC	84553
hsa-miR-1185-1-3p	HSPB7	27129
hsa-miR-1185-1-3p	SLC15A5	729025
hsa-miR-1185-1-3p	MFAP3	4238
hsa-miR-1185-1-3p	UHRF1	29128
hsa-miR-1185-1-3p	PDE11A	50940
hsa-miR-1185-1-3p	ABL2	27
hsa-miR-1185-1-3p	KMT2E	55904
hsa-miR-1185-1-3p	CDS2	8760
hsa-miR-1185-1-3p	XDH	7498
hsa-miR-1185-1-3p	ADNP	23394
hsa-miR-1185-1-3p	HMGB3	3149
hsa-miR-1185-1-3p	USP48	84196
hsa-miR-1185-1-3p	PRR14L	253143
hsa-miR-1185-1-3p	OTUD1	220213
hsa-miR-1185-1-3p	CNTN3	5067
hsa-miR-1185-1-3p	RBM25	58517
hsa-miR-1185-1-3p	RASA1	5921
hsa-miR-1185-1-3p	RBM12	10137
hsa-miR-1185-1-3p	CD163	9332
hsa-miR-1185-1-3p	ERAP1	51752
hsa-miR-1185-1-3p	ACVR1C	130399
hsa-miR-1185-1-3p	TRAPPC3L	100128327
hsa-miR-1185-1-3p	C2orf54	79919
hsa-miR-1185-1-3p	PRICKLE1	144165
hsa-miR-1185-1-3p	USP6NL	9712
hsa-miR-1185-1-3p	CYP26B1	56603
hsa-miR-1185-1-3p	COBLL1	22837
hsa-miR-1185-1-3p	UPRT	139596
hsa-miR-1185-1-3p	SAA2	6289
hsa-miR-1185-1-3p	LGSN	51557
hsa-miR-1185-1-3p	CAV2	858
hsa-miR-1185-1-3p	RTN4	57142
hsa-miR-1185-1-3p	NPAT	4863
hsa-miR-1185-1-3p	USP6	9098
hsa-miR-1185-1-3p	NRIP1	8204
hsa-miR-1185-1-3p	DGKB	1607
hsa-miR-1185-1-3p	CHAMP1	283489
hsa-miR-1185-1-3p	WASF2	10163
hsa-miR-1185-1-3p	NAA15	80155
hsa-miR-1185-1-3p	LIFR	3977
hsa-miR-1185-1-3p	PPP2R5E	5529
hsa-miR-1185-1-3p	PBRM1	55193
hsa-miR-1185-1-3p	HMGB1	3146
hsa-miR-1185-1-3p	PCDH15	65217
hsa-miR-1185-1-3p	KLF10	7071
hsa-miR-1185-1-3p	BCL6	604
hsa-miR-1185-1-3p	KHDRBS3	10656
hsa-miR-1185-1-3p	KIT	3815
hsa-miR-1185-1-3p	EZR	7430
hsa-miR-1185-1-3p	LMTK2	22853
hsa-miR-1185-1-3p	YPEL3	83719
hsa-miR-1185-1-3p	KCNG3	170850
hsa-miR-1185-1-3p	MIB1	57534
hsa-miR-1185-1-3p	RHBDL3	162494
hsa-miR-1185-1-3p	DLX5	1749
hsa-miR-1185-1-3p	SLAIN2	57606
hsa-miR-1185-1-3p	PRKAA1	5562
hsa-miR-1185-1-3p	GCC2	9648
hsa-miR-1185-1-3p	STRN4	29888
hsa-miR-1185-1-3p	PWWP2A	114825
hsa-miR-1185-1-3p	GADL1	339896
hsa-miR-1185-1-3p	FAM126A	84668
hsa-miR-1185-1-3p	RPS6KA6	27330
hsa-miR-1185-1-3p	RGPD6	729540
hsa-miR-1185-1-3p	UBE2W	55284
hsa-miR-1185-1-3p	TUBGCP5	114791
hsa-miR-1185-1-3p	ACADSB	36
hsa-miR-1185-1-3p	LANCL2	55915
hsa-miR-1185-1-3p	MITF	4286
hsa-miR-1185-1-3p	IQGAP1	8826
hsa-miR-1185-1-3p	ZFX	7543
hsa-miR-1185-1-3p	CREBBP	1387
hsa-miR-1185-1-3p	ZFPM2	23414
hsa-miR-1185-1-3p	HNRNPU	3192
hsa-miR-1185-1-3p	RGPD5	84220
hsa-miR-1185-1-3p	CADM2	253559
hsa-miR-1185-1-3p	PDCD6IP	10015
hsa-miR-1185-1-3p	DCLRE1B	64858
hsa-miR-1185-1-3p	RNF182	221687
hsa-miR-1185-1-3p	PBX3	5090
hsa-miR-1185-1-3p	FUT8	2530
hsa-miR-1185-1-3p	KIF13A	63971
hsa-miR-1185-1-3p	ROBO2	6092
hsa-miR-1185-1-3p	GCFC2	6936
hsa-miR-1185-1-3p	YAF2	10138
hsa-miR-1185-1-3p	LHX2	9355
hsa-miR-1185-1-3p	RIPPLY3	53820
hsa-miR-1185-1-3p	CD24	100133941
hsa-miR-1185-1-3p	FUT9	10690
hsa-miR-1185-1-3p	ERO1LB	56605
hsa-miR-1185-1-3p	WDR37	22884
hsa-miR-1185-1-3p	CHODL	140578
hsa-miR-1185-1-3p	SALL1	6299
hsa-miR-1185-1-3p	AZIN1	51582
hsa-miR-1185-1-3p	TNFRSF11B	4982
hsa-miR-1185-1-3p	LATS1	9113
hsa-miR-1185-1-3p	ENC1	8507
hsa-miR-1185-1-3p	DBT	1629
hsa-miR-1185-1-3p	RNF19A	25897
hsa-miR-1185-1-3p	NAV3	89795
hsa-miR-1185-1-3p	TENM1	10178
hsa-miR-1185-1-3p	WDR82	80335
hsa-miR-1185-1-3p	LOX	4015
hsa-miR-1185-1-3p	RSPO2	340419
hsa-miR-1185-1-3p	RPRD1A	55197
hsa-miR-1185-1-3p	TLE4	7091
hsa-miR-1185-1-3p	TNPO1	3842
hsa-miR-1185-1-3p	CDC27	996
hsa-miR-1185-1-3p	KIN	22944
hsa-miR-1185-1-3p	ZNF721	170960
hsa-miR-1185-1-3p	SEC24D	9871
hsa-miR-1185-1-3p	STIM2	57620
hsa-miR-1185-1-3p	SUN1	23353
hsa-miR-1185-1-3p	ZNF780B	163131
hsa-miR-1185-1-3p	NKTR	4820
hsa-miR-1185-1-3p	SFPQ	6421
hsa-miR-1185-1-3p	LEPROT	54741
hsa-miR-1185-1-3p	DLX6	1750
hsa-miR-1185-1-3p	KIAA1467	57613
hsa-miR-1185-1-3p	MAPK1	5594
hsa-miR-1185-1-3p	XIAP	331
hsa-miR-1185-1-3p	RNF141	50862
hsa-miR-1185-1-3p	FBXO32	114907
hsa-miR-1185-1-3p	ZNF680	340252
hsa-miR-1185-1-3p	SERINC3	10955
hsa-miR-1185-1-3p	TRIM52	84851
hsa-miR-1185-1-3p	ZNF638	27332
hsa-miR-1185-1-3p	C16orf52	730094
hsa-miR-1185-1-3p	HSPE1-MOB4	100529241
hsa-miR-1185-1-3p	ZCCHC8	55596
hsa-miR-1185-1-3p	FILIP1L	11259
hsa-miR-1185-1-3p	ESCO1	114799
hsa-miR-1185-1-3p	GLOD4	51031
hsa-miR-1185-1-3p	SLC22A3	6581
hsa-miR-1185-1-3p	CSNK1G3	1456
hsa-miR-1185-1-3p	SLC35A3	23443
hsa-miR-1185-1-3p	IBSP	3381
hsa-miR-1185-1-3p	SLC37A3	84255
hsa-miR-1185-1-3p	ARPC5	10092
hsa-miR-1185-1-3p	SLC30A5	64924
hsa-miR-1185-1-3p	JAK2	3717
hsa-miR-1185-1-3p	KIAA1324L	222223
hsa-miR-1185-1-3p	PCSK2	5126
hsa-miR-1185-1-3p	GABPA	2551
hsa-miR-1185-1-3p	PRDM16	63976
hsa-miR-1185-1-3p	ROCK1	6093
hsa-miR-1185-1-3p	TOB1	10140
hsa-miR-1185-1-3p	QKI	9444
hsa-miR-1185-1-3p	FLT1	2321
hsa-miR-1185-1-3p	TLR4	7099
hsa-miR-1185-1-3p	GABRA4	2557
hsa-miR-1185-1-3p	PGAP1	80055
hsa-miR-1185-1-3p	GPRASP1	9737
hsa-miR-1185-1-3p	EIF5A2	56648
hsa-miR-1185-1-3p	RAB18	22931
hsa-miR-1185-1-3p	CBLN4	140689
hsa-miR-1185-1-3p	SATB1	6304
hsa-miR-1185-1-3p	SOD2	6648
hsa-miR-1185-1-3p	ATG12	9140
hsa-miR-1185-1-3p	MAPKAPK5	8550
hsa-miR-1185-1-3p	DOCK3	1795
hsa-miR-1185-1-3p	NSL1	25936
hsa-miR-1185-1-3p	SLC25A21	89874
hsa-miR-1185-1-3p	NDFIP1	80762
hsa-miR-1185-1-3p	KIAA2022	340533
hsa-miR-1185-1-3p	PRPS2	5634
hsa-miR-1185-1-3p	HOXA9	3205
hsa-miR-1185-1-3p	TSEN34	79042
hsa-miR-1185-1-3p	SORL1	6653
hsa-miR-1185-1-3p	VIMP	55829
hsa-miR-1185-1-3p	TIMP3	7078
hsa-miR-1185-1-3p	FZD3	7976
hsa-miR-1185-1-3p	CDK6	1021
hsa-miR-1185-1-3p	PDS5B	23047
hsa-miR-1185-1-3p	FAM172A	83989
hsa-miR-1185-1-3p	RPL22L1	200916
hsa-miR-1185-1-3p	SNAP91	9892
hsa-miR-1185-1-3p	ZSWIM6	57688
hsa-miR-1185-1-3p	SFSWAP	6433
hsa-miR-1185-1-3p	TRDMT1	1787
hsa-miR-1185-1-3p	ARF3	377
hsa-miR-1185-1-3p	FRMPD4	9758
hsa-miR-1185-1-3p	ASAP2	8853
hsa-miR-1185-1-3p	ERCC3	2071
hsa-miR-1185-1-3p	EYS	346007
hsa-miR-1185-1-3p	FERMT2	10979
hsa-miR-1185-1-3p	RAB2A	5862
hsa-miR-1185-1-3p	N4BP2	55728
hsa-miR-1185-1-3p	CCDC85A	114800
hsa-miR-1185-1-3p	RORA	6095
hsa-miR-1185-1-3p	GOLGA7	51125
hsa-miR-1185-1-3p	AREG	374
hsa-miR-1185-1-3p	MPZ	4359
hsa-miR-1185-1-3p	MORC3	23515
hsa-miR-1185-1-3p	IL7	3574
hsa-miR-1185-1-3p	MMS22L	253714
hsa-miR-1185-1-3p	TSPAN2	10100
hsa-miR-1185-1-3p	KCNC2	3747
hsa-miR-1185-1-3p	IPMK	253430
hsa-miR-1185-1-3p	INO80D	54891
hsa-miR-1185-1-3p	MTOR	2475
hsa-miR-1185-1-3p	ANKIB1	54467
hsa-miR-1185-1-3p	TMPO	7112
hsa-miR-1185-1-3p	PRDM1	639
hsa-miR-1185-1-3p	EDAR	10913
hsa-miR-1185-1-3p	ULBP1	80329
hsa-miR-1185-1-3p	METTL21A	151194
hsa-miR-1185-1-3p	FMN2	56776
hsa-miR-1185-1-3p	ZNF292	23036
hsa-miR-1185-1-3p	DYNLL2	140735
hsa-miR-1185-1-3p	DYNC2LI1	51626
hsa-miR-1185-1-3p	PCM1	5108
hsa-miR-1185-1-3p	SON	6651
hsa-miR-1185-1-3p	DGKI	9162
hsa-miR-1185-1-3p	PDE5A	8654
hsa-miR-1185-1-3p	E2F6	1876
hsa-miR-1185-1-3p	CHMP2B	25978
hsa-miR-1185-1-3p	STARD13	90627
hsa-miR-1185-1-3p	PIGW	284098
hsa-miR-1185-1-3p	TRIM13	10206
hsa-miR-1185-1-3p	KIAA1715	80856
hsa-miR-1185-1-3p	MAB21L1	4081
hsa-miR-1185-1-3p	PLCXD3	345557
hsa-miR-1185-1-3p	MASP1	5648
hsa-miR-1185-1-3p	WDR33	55339
hsa-miR-1185-1-3p	TNC	3371
hsa-miR-1185-1-3p	SOX9	6662
hsa-miR-1185-1-3p	A1CF	29974
hsa-miR-1185-1-3p	EAPP	55837
hsa-miR-1185-1-3p	CNR1	1268
hsa-miR-1185-1-3p	RGL1	23179
hsa-miR-1185-1-3p	ENKUR	219670
hsa-miR-1185-1-3p	SFMBT2	57713
hsa-miR-1185-1-3p	MIER3	166968
hsa-miR-1185-1-3p	DNAJB12	54788
hsa-miR-1185-1-3p	EDN2	1907
hsa-miR-1185-1-3p	PTGER3	5733
hsa-miR-1185-1-3p	ART3	419
hsa-miR-1185-1-3p	MAML1	9794
hsa-miR-1185-1-3p	ETV5	2119
hsa-miR-1185-1-3p	ST8SIA3	51046
hsa-miR-1185-1-3p	WDR17	116966
hsa-miR-1185-1-3p	IRF2BP2	359948
hsa-miR-1185-1-3p	USP45	85015
hsa-miR-1185-1-3p	MCF2	4168
hsa-miR-1185-1-3p	ZBTB44	29068
hsa-miR-1185-1-3p	RAP1A	5906
hsa-miR-1185-1-3p	UBR3	130507
hsa-miR-1185-1-3p	TXLNG	55787
hsa-miR-1185-1-3p	KLF12	11278
hsa-miR-1185-1-3p	ASAH1	427
hsa-miR-1185-1-3p	CTPS2	56474
hsa-miR-1185-1-3p	MSX1	4487
hsa-miR-1185-1-3p	PRPF4B	8899
hsa-miR-1185-1-3p	TSPAN12	23554
hsa-miR-1185-1-3p	HVCN1	84329
hsa-miR-1185-1-3p	UBN2	254048
hsa-miR-1185-1-3p	UBE2Z	65264
hsa-miR-1185-1-3p	LSM5	23658
hsa-miR-1185-1-3p	ZBTB38	253461
hsa-miR-1185-1-3p	PDE7A	5150
hsa-miR-1185-1-3p	MARCH1	55016
hsa-miR-1185-1-3p	SMOC1	64093
hsa-miR-1185-1-3p	FAM105A	54491
hsa-miR-1185-1-3p	STK10	6793
hsa-miR-1185-1-3p	TPD52	7163
hsa-miR-1185-1-3p	PNRC1	10957
hsa-miR-1185-1-3p	GABRB2	2561
hsa-miR-1185-1-3p	OR2C3	81472
hsa-miR-1185-1-3p	FSTL5	56884
hsa-miR-1185-1-3p	EFR3A	23167
hsa-miR-1185-1-3p	SCN5A	6331
hsa-miR-1185-1-3p	SPAST	6683
hsa-miR-1185-1-3p	SLC33A1	9197
hsa-miR-1185-1-3p	EGR2	1959
hsa-miR-1185-1-3p	SUSD5	26032
hsa-miR-1185-1-3p	FAM102B	284611
hsa-miR-1185-1-3p	TRMT1L	81627
hsa-miR-1185-1-3p	MAP2	4133
hsa-miR-1185-1-3p	LSM14A	26065
hsa-miR-1185-1-3p	PSMA1	5682
hsa-miR-1185-1-3p	MCTP2	55784
hsa-miR-1185-1-3p	IAPP	3375
hsa-miR-1185-1-3p	IRX3	79191
hsa-miR-1185-1-3p	LRP6	4040
hsa-miR-1185-1-3p	ANP32A	8125
hsa-miR-1185-1-3p	VPS13A	23230
hsa-miR-1185-1-3p	ANKRA2	57763
hsa-miR-1185-1-3p	MED13L	23389
hsa-miR-1185-1-3p	AFTPH	54812
hsa-miR-1185-1-3p	PTGFR	5737
hsa-miR-1185-1-3p	DDX46	9879
hsa-miR-1185-1-3p	F2RL2	2151
hsa-miR-1185-1-3p	ARAP1	116985
hsa-miR-1185-1-3p	ZBTB41	360023
hsa-miR-1185-1-3p	UBE2C	11065
hsa-miR-1185-1-3p	TBK1	29110
hsa-miR-1185-1-3p	NADK2	133686
hsa-miR-1185-1-3p	FOXJ2	55810
hsa-miR-1185-1-3p	CBX3	11335
hsa-miR-1185-1-3p	FAM13B	51306
hsa-miR-1185-1-3p	BCKDHB	594
hsa-miR-1185-1-3p	MYCN	4613
hsa-miR-1185-1-3p	MBD2	8932
hsa-miR-1185-1-3p	ZNF10	7556
hsa-miR-1185-1-3p	PAN3	255967
hsa-miR-1185-1-3p	IRX1	79192
hsa-miR-1185-1-3p	ENPP3	5169
hsa-miR-1185-1-3p	CALCRL	10203
hsa-miR-1185-1-3p	EGLN1	54583
hsa-miR-1185-1-3p	ID2	3398
hsa-miR-1185-1-3p	STRN	6801
hsa-miR-1185-1-3p	DST	667
hsa-miR-1185-1-3p	GLI2	2736
hsa-miR-1185-1-3p	TMEM167A	153339
hsa-miR-1185-1-3p	CDKN1B	1027
hsa-miR-1185-1-3p	VAMP4	8674
hsa-miR-1185-1-3p	RNF149	284996
hsa-miR-1185-1-3p	TMEM47	83604
hsa-miR-1185-1-3p	TRAF3IP1	26146
hsa-miR-1185-1-3p	LHFPL3	375612
hsa-miR-1185-1-3p	CAPRIN1	4076
hsa-miR-1185-1-3p	SGCG	6445
hsa-miR-1185-1-3p	NUP160	23279
hsa-miR-1185-1-3p	REG4	83998
hsa-miR-1185-1-3p	ZNF250	58500
hsa-miR-1185-1-3p	ASXL1	171023
hsa-miR-1185-1-3p	NPTX1	4884
hsa-miR-1185-1-3p	EIF4A2	1974
hsa-miR-1185-1-3p	GRHL3	57822
hsa-miR-1185-1-3p	PTGS2	5743
hsa-miR-1185-1-3p	KIF14	9928
hsa-miR-1185-1-3p	ZNF639	51193
hsa-miR-1185-1-3p	SLC22A10	387775
hsa-miR-1185-1-3p	CCDC126	90693
hsa-miR-1185-1-3p	ARID4A	5926
hsa-miR-1185-1-3p	PAG1	55824
hsa-miR-1185-1-3p	RPGR	6103
hsa-miR-1185-1-3p	BMP3	651
hsa-miR-1185-1-3p	MYO1E	4643
hsa-miR-1185-1-3p	WASL	8976
hsa-miR-1185-1-3p	ZNF140	7699
hsa-miR-1185-1-3p	SLC7A11	23657
hsa-miR-1185-1-3p	ITGA6	3655
hsa-miR-1185-1-3p	FRMPD3	84443
hsa-miR-1185-1-3p	GK5	256356
hsa-miR-1185-1-3p	ATP13A3	79572
hsa-miR-1185-1-3p	WDR72	256764
hsa-miR-1185-1-3p	PEX14	5195
hsa-miR-1185-1-3p	PHIP	55023
hsa-miR-1185-1-3p	GRIA3	2892
hsa-miR-1185-1-3p	SLC39A8	64116
hsa-miR-1185-1-3p	LITAF	9516
hsa-miR-1185-1-3p	STXBP1	6812
hsa-miR-1185-1-3p	TYRP1	7306
hsa-miR-1185-1-3p	ADAMTS5	11096
hsa-miR-1185-1-3p	GP1BA	2811
hsa-miR-1185-1-3p	MAP1LC3B	81631
hsa-miR-1185-1-3p	ZNF746	155061
hsa-miR-1185-1-3p	FAM65B	9750
hsa-miR-1185-1-3p	SLC17A6	57084
hsa-miR-1185-1-3p	DDHD2	23259
hsa-miR-1185-1-3p	PHF13	148479
hsa-miR-1185-1-3p	COL19A1	1310
hsa-miR-1185-1-3p	ONECUT2	9480
hsa-miR-1185-1-3p	TMEM67	91147
hsa-miR-1185-1-3p	RGPD4	285190
hsa-miR-1185-1-3p	SMNDC1	10285
hsa-miR-1185-1-3p	KLHL3	26249
hsa-miR-1185-1-3p	ZC3H6	376940
hsa-miR-1185-1-3p	SHB	6461
hsa-miR-1185-1-3p	KATNAL1	84056
hsa-miR-1185-1-3p	KBTBD11	9920
hsa-miR-1185-1-3p	SAV1	60485
hsa-miR-1185-1-3p	SLC44A1	23446
hsa-miR-1185-1-3p	LCTL	197021
hsa-miR-1185-1-3p	PAFAH1B2	5049
hsa-miR-1185-1-3p	ZNF280D	54816
hsa-miR-1185-1-3p	ELK4	2005
hsa-miR-1185-1-3p	PURA	5813
hsa-miR-1185-1-3p	FAT1	2195
hsa-miR-1185-1-3p	TRAPPC4	51399
hsa-miR-1185-1-3p	FGD4	121512
hsa-miR-1185-1-3p	TRIM61	391712
hsa-miR-1185-1-3p	IKZF2	22807
hsa-miR-1185-1-3p	TRAPPC6B	122553
hsa-miR-1185-1-3p	RPS6KA1	6195
hsa-miR-1185-1-3p	BMP7	655
hsa-miR-1185-1-3p	NEUROD1	4760
hsa-miR-1185-1-3p	CDKL2	8999
hsa-miR-1185-1-3p	TMEM2	23670
hsa-miR-1185-1-3p	PPP1R9B	84687
hsa-miR-1185-1-3p	FRMD3	257019
hsa-miR-1185-1-3p	SH3TC2	79628
hsa-miR-1185-1-3p	CDK14	5218
hsa-miR-1185-1-3p	RALGPS2	55103
hsa-miR-1185-1-3p	ATP2B2	491
hsa-miR-1185-1-3p	TRIB1	10221
hsa-miR-1185-1-3p	GABPB1	2553
hsa-miR-1185-1-3p	GDAP2	54834
hsa-miR-1185-1-3p	INSM1	3642
hsa-miR-1185-1-3p	STYX	6815
hsa-miR-1185-1-3p	UBE2D1	7321
hsa-miR-1185-1-3p	KIF3A	11127
hsa-miR-1185-1-3p	PCDHA9	9752
hsa-miR-1185-1-3p	CHMP1B	57132
hsa-miR-1185-1-3p	MFSD4	148808
hsa-miR-1185-1-3p	CPD	1362
hsa-miR-1185-1-3p	PLSCR1	5359
hsa-miR-1185-1-3p	ADCY7	113
hsa-miR-1185-1-3p	STXBP5L	9515
hsa-miR-1185-1-3p	EPHA5	2044
hsa-miR-1185-1-3p	FBXO9	26268
hsa-miR-1185-1-3p	MRPS36	92259
hsa-miR-1185-1-3p	ARFGEF2	10564
hsa-miR-1185-1-3p	CTTNBP2	83992
hsa-miR-1185-1-3p	SAMD5	389432
hsa-miR-1185-1-3p	DNAJB9	4189
hsa-miR-1185-1-3p	SKP1	6500
hsa-miR-1185-1-3p	TTC28	23331
hsa-miR-1185-1-3p	ZBTB5	9925
hsa-miR-1185-1-3p	NECAB1	64168
hsa-miR-1185-1-3p	PHF3	23469
hsa-miR-1185-1-3p	UBR1	197131
hsa-miR-1185-1-3p	HCN4	10021
hsa-miR-1185-1-3p	CCNE2	9134
hsa-miR-1185-1-3p	CTDSPL2	51496
hsa-miR-1185-1-3p	C4orf40	401137
hsa-miR-1185-1-3p	POLI	11201
hsa-miR-1185-1-3p	TIFA	92610
hsa-miR-1185-1-3p	BMPR2	659
hsa-miR-1185-1-3p	NFX1	4799
hsa-miR-1185-1-3p	CH25H	9023
hsa-miR-1185-1-3p	ADAM12	8038
hsa-miR-1185-1-3p	FJX1	24147
hsa-miR-1185-1-3p	SNX33	257364
hsa-miR-1185-1-3p	ZYG11B	79699
hsa-miR-1185-1-3p	PRTG	283659
hsa-miR-1185-1-3p	GRIK3	2899
hsa-miR-1185-1-3p	HIAT1	64645
hsa-miR-1185-1-3p	DCAF7	10238
hsa-miR-1185-1-3p	FBXO34	55030
hsa-miR-1185-1-3p	TEK	7010
hsa-miR-1185-1-3p	ZNF709	163051
hsa-miR-1185-1-3p	RAPGEF5	9771
hsa-miR-1185-1-3p	KIAA1147	57189
hsa-miR-1185-1-3p	ANKS1A	23294
hsa-miR-1185-1-3p	RC3H1	149041
hsa-miR-1185-1-3p	MTM1	4534
hsa-miR-1185-1-3p	CCL8	6355
hsa-miR-1185-1-3p	CNOT6	57472
hsa-miR-1185-1-3p	PNN	5411
hsa-miR-1185-1-3p	TAP2	6891
hsa-miR-1185-1-3p	MYCBP	26292
hsa-miR-1185-1-3p	TP53INP1	94241
hsa-miR-1185-1-3p	POLR3G	10622
hsa-miR-1185-1-3p	MAGT1	84061
hsa-miR-1185-1-3p	DBX2	440097
hsa-miR-1185-1-3p	REL	5966
hsa-miR-1185-1-3p	MAP3K5	4217
hsa-miR-1185-1-3p	DPY19L1	23333
hsa-miR-1185-1-3p	SYDE2	84144
hsa-miR-1185-1-3p	BEND7	222389
hsa-miR-1185-1-3p	ATL2	64225
hsa-miR-1185-1-3p	SLC39A14	23516
hsa-miR-1185-1-3p	KIAA2018	205717
hsa-miR-1185-1-3p	F2R	2149
hsa-miR-1185-1-3p	HMGXB4	10042
hsa-miR-1185-1-3p	NEMF	9147
hsa-miR-1185-1-3p	RAB14	51552
hsa-miR-1185-1-3p	ZNF441	126068
hsa-miR-1185-1-3p	AREGB	727738
hsa-miR-125b-2-3p	RNF169	254225
hsa-miR-125b-2-3p	NTRK2	4915
hsa-miR-125b-2-3p	PHACTR2	9749
hsa-miR-125b-2-3p	ZNF345	25850
hsa-miR-125b-2-3p	HNRNPU	3192
hsa-miR-125b-2-3p	WBP5	51186
hsa-miR-125b-2-3p	VASH2	79805
hsa-miR-125b-2-3p	AFF2	2334
hsa-miR-125b-2-3p	ST8SIA1	6489
hsa-miR-125b-2-3p	TRDN	10345
hsa-miR-125b-2-3p	KIAA1551	55196
hsa-miR-125b-2-3p	CDC14B	8555
hsa-miR-125b-2-3p	C1orf52	148423
hsa-miR-125b-2-3p	FAM46A	55603
hsa-miR-125b-2-3p	ALG10B	144245
hsa-miR-125b-2-3p	C1GALT1	56913
hsa-miR-125b-2-3p	METTL15	196074
hsa-miR-125b-2-3p	BMPR1A	657
hsa-miR-125b-2-3p	POLR2D	5433
hsa-miR-125b-2-3p	BCL2L11	10018
hsa-miR-125b-2-3p	AK3	50808
hsa-miR-125b-2-3p	SEL1L	6400
hsa-miR-125b-2-3p	DEPDC1	55635
hsa-miR-125b-2-3p	SBF2	81846
hsa-miR-125b-2-3p	HTR4	3360
hsa-miR-125b-2-3p	UBE2D2	7322
hsa-miR-125b-2-3p	IMMT	10989
hsa-miR-125b-2-3p	NPC2	10577
hsa-miR-125b-2-3p	ZMYM5	9205
hsa-miR-125b-2-3p	PEG10	23089
hsa-miR-125b-2-3p	CENPC	1060
hsa-miR-125b-2-3p	SIRT1	23411
hsa-miR-125b-2-3p	PRDM16	63976
hsa-miR-125b-2-3p	PDDC1	347862
hsa-miR-125b-2-3p	CTNS	1497
hsa-miR-125b-2-3p	ARID4A	5926
hsa-miR-125b-2-3p	GPR85	54329
hsa-miR-125b-2-3p	PYROXD1	79912
hsa-miR-125b-2-3p	SPECC1	92521
hsa-miR-125b-2-3p	KCNMA1	3778
hsa-miR-125b-2-3p	ALDH5A1	7915
hsa-miR-125b-2-3p	TMEM196	256130
hsa-miR-125b-2-3p	MAP3K1	4214
hsa-miR-125b-2-3p	FAM53C	51307
hsa-miR-125b-2-3p	SLC18A2	6571
hsa-miR-125b-2-3p	HMG20A	10363
hsa-miR-125b-2-3p	GOLPH3L	55204
hsa-miR-125b-2-3p	TMEM257	9142
hsa-miR-125b-2-3p	RNF38	152006
hsa-miR-125b-2-3p	MIPOL1	145282
hsa-miR-125b-2-3p	HBS1L	10767
hsa-miR-125b-2-3p	CTNNBIP1	56998
hsa-miR-125b-2-3p	SPRED2	200734
hsa-miR-125b-2-3p	CALCR	799
hsa-miR-125b-2-3p	PPIA	5478
hsa-miR-125b-2-3p	SLC20A1	6574
hsa-miR-125b-2-3p	PRR11	55771
hsa-miR-125b-2-3p	SYT16	83851
hsa-miR-125b-2-3p	IRF8	3394
hsa-miR-125b-2-3p	UBE2E1	7324
hsa-miR-125b-2-3p	VAPA	9218
hsa-miR-125b-2-3p	TNRC6B	23112
hsa-miR-125b-2-3p	COL1A1	1277
hsa-miR-125b-2-3p	TRAM1	23471
hsa-miR-125b-2-3p	C12orf75	387882
hsa-miR-125b-2-3p	PRR13	54458
hsa-miR-125b-2-3p	CSRNP3	80034
hsa-miR-125b-2-3p	C1QTNF3	114899
hsa-miR-125b-2-3p	MDH1	4190
hsa-miR-125b-2-3p	STEAP2	261729
hsa-miR-125b-2-3p	PCNA	5111
hsa-miR-125b-2-3p	DAZAP2	9802
hsa-miR-125b-2-3p	DAZAP1	26528
hsa-miR-125b-2-3p	MFAP1	4236
hsa-miR-125b-2-3p	RAB6B	51560
hsa-miR-125b-2-3p	GSTCD	79807
hsa-miR-125b-2-3p	SNCA	6622
hsa-miR-125b-2-3p	SETD5	55209
hsa-miR-125b-2-3p	CREBRF	153222
hsa-miR-125b-2-3p	PRPF40A	55660
hsa-miR-125b-2-3p	DBF4	10926
hsa-miR-125b-2-3p	LPAR5	57121
hsa-miR-125b-2-3p	FAM217A	222826
hsa-miR-125b-2-3p	PRKAR1A	5573
hsa-miR-125b-2-3p	SNAI2	6591
hsa-miR-125b-2-3p	NSFL1C	55968
hsa-miR-125b-2-3p	SLC10A7	84068
hsa-miR-125b-2-3p	RBPJ	3516
hsa-miR-125b-2-3p	NUDT4	11163
hsa-miR-125b-2-3p	CCPG1	9236
hsa-miR-125b-2-3p	COL5A2	1290
hsa-miR-125b-2-3p	TSPAN12	23554
hsa-miR-125b-2-3p	S100PBP	64766
hsa-miR-125b-2-3p	MZT1	440145
hsa-miR-125b-2-3p	CTSV	1515
hsa-miR-125b-2-3p	ABCE1	6059
hsa-miR-125b-2-3p	SH2B3	10019
hsa-miR-125b-2-3p	MTMR12	54545
hsa-miR-125b-2-3p	WEE1	7465
hsa-miR-125b-2-3p	C16orf70	80262
hsa-miR-125b-2-3p	FZD3	7976
hsa-miR-125b-2-3p	PRTG	283659
hsa-miR-125b-2-3p	ARFIP1	27236
hsa-miR-125b-2-3p	NCAM1	4684
hsa-miR-125b-2-3p	GALNT7	51809
hsa-miR-125b-2-3p	MMRN2	79812
hsa-miR-125b-2-3p	GABRA4	2557
hsa-miR-125b-2-3p	ARPP19	10776
hsa-miR-125b-2-3p	PCMTD2	55251
hsa-miR-125b-2-3p	SRFBP1	153443
hsa-miR-125b-2-3p	TENM3	55714
hsa-miR-125b-2-3p	SMIM8	57150
hsa-miR-125b-2-3p	ATP6V1C2	245973
hsa-miR-125b-2-3p	CASP3	836
hsa-miR-125b-2-3p	RHBDD1	84236
hsa-miR-125b-2-3p	ZNF652	22834
hsa-miR-125b-2-3p	CRKL	1399
hsa-miR-125b-2-3p	USP46	64854
hsa-miR-125b-2-3p	UGT2A2	574537
hsa-miR-125b-2-3p	PARP2	10038
hsa-miR-125b-2-3p	NDFIP2	54602
hsa-miR-125b-2-3p	YES1	7525
hsa-miR-125b-2-3p	COX6B2	125965
hsa-miR-125b-2-3p	DUSP11	8446
hsa-miR-125b-2-3p	VPS35	55737
hsa-miR-125b-2-3p	ZNF555	148254
hsa-miR-125b-2-3p	KIAA2022	340533
hsa-miR-125b-2-3p	PDPK1	5170
hsa-miR-125b-2-3p	PEG3	5178
hsa-miR-125b-2-3p	CNTNAP3	79937
hsa-miR-125b-2-3p	ZNF275	10838
hsa-miR-125b-2-3p	FAM84B	157638
hsa-miR-125b-2-3p	PHLDA1	22822
hsa-miR-125b-2-3p	CD36	948
hsa-miR-125b-2-3p	PRPSAP2	5636
hsa-miR-125b-2-3p	SNRPF	6636
hsa-miR-125b-2-3p	DCUN1D5	84259
hsa-miR-125b-2-3p	WRB	7485
hsa-miR-125b-2-3p	AAK1	22848
hsa-miR-125b-2-3p	MED13L	23389
hsa-miR-125b-2-3p	DR1	1810
hsa-miR-125b-2-3p	DIEXF	27042
hsa-miR-125b-2-3p	TAF1D	79101
hsa-miR-125b-2-3p	MYZAP	100820829
hsa-miR-125b-2-3p	E2F6	1876
hsa-miR-125b-2-3p	RPL9	6133
hsa-miR-125b-2-3p	ZIC3	7547
hsa-miR-125b-2-3p	MCHR2	84539
hsa-miR-125b-2-3p	PPARGC1B	133522
hsa-miR-125b-2-3p	MXI1	4601
hsa-miR-125b-2-3p	LRIF1	55791
hsa-miR-125b-2-3p	B3GALNT2	148789
hsa-miR-125b-2-3p	ATXN1L	342371
hsa-miR-125b-2-3p	EML4	27436
hsa-miR-125b-2-3p	PNN	5411
hsa-miR-125b-2-3p	SYN2	6854
hsa-miR-125b-2-3p	EDAR	10913
hsa-miR-125b-2-3p	ECHDC2	55268
hsa-miR-125b-2-3p	FRMPD4	9758
hsa-miR-125b-2-3p	FAM46D	169966
hsa-miR-125b-2-3p	CNKSR2	22866
hsa-miR-125b-2-3p	AMD1	262
hsa-miR-125b-2-3p	NLGN4X	57502
hsa-miR-125b-2-3p	HEPACAM2	253012
hsa-miR-125b-2-3p	SORD	6652
hsa-miR-125b-2-3p	PELI2	57161
hsa-miR-125b-2-3p	PIK3R3	8503
hsa-miR-125b-2-3p	ZNF264	9422
hsa-miR-125b-2-3p	EXOSC2	23404
hsa-miR-125b-2-3p	EIF4A2	1974
hsa-miR-125b-2-3p	GHITM	27069
hsa-miR-125b-2-3p	BRCC3	79184
hsa-miR-125b-2-3p	EPHA3	2042
hsa-miR-125b-2-3p	DHRS9	10170
hsa-miR-125b-2-3p	KLHL28	54813
hsa-miR-125b-2-3p	ZNF182	7569
hsa-miR-125b-2-3p	PCMTD1	115294
hsa-miR-125b-2-3p	LIN28B	389421
hsa-miR-125b-2-3p	SV2B	9899
hsa-miR-125b-2-3p	PPP2CA	5515
hsa-miR-125b-2-3p	EPB41L4B	54566
hsa-miR-125b-2-3p	OR51E2	81285
hsa-miR-125b-2-3p	GBAS	2631
hsa-miR-125b-2-3p	TRAF3	7187
hsa-miR-125b-2-3p	POP1	10940
hsa-miR-125b-2-3p	PLA2R1	22925
hsa-miR-125b-2-3p	ATP6V1C1	528
hsa-miR-125b-2-3p	SSR1	6745
hsa-miR-125b-2-3p	TAOK1	57551
hsa-miR-125b-2-3p	DIRC2	84925
hsa-miR-125b-2-3p	ITGAV	3685
hsa-miR-125b-2-3p	KIAA0430	9665
hsa-miR-125b-2-3p	EYA3	2140
hsa-miR-125b-2-3p	ERBB4	2066
hsa-miR-125b-2-3p	RRM2	6241
hsa-miR-125b-2-3p	VPS13C	54832
hsa-miR-125b-2-3p	ZFAND5	7763
hsa-miR-125b-2-3p	UBXN2B	137886
hsa-miR-125b-2-3p	DCP1A	55802
hsa-miR-125b-2-3p	C11orf87	399947
hsa-miR-125b-2-3p	NKIRAS1	28512
hsa-miR-125b-2-3p	EGLN1	54583
hsa-miR-125b-2-3p	ANP32E	81611
hsa-miR-125b-2-3p	GK2	2712
hsa-miR-125b-2-3p	ZNF485	220992
hsa-miR-125b-2-3p	RAB18	22931
hsa-miR-125b-2-3p	BAG1	573
hsa-miR-125b-2-3p	ELL2	22936
hsa-miR-125b-2-3p	UBN2	254048
hsa-miR-125b-2-3p	SSR3	6747
hsa-miR-125b-2-3p	GNB4	59345
hsa-miR-125b-2-3p	EFCAB11	90141
hsa-miR-125b-2-3p	PDZRN4	29951
hsa-miR-125b-2-3p	FAM208B	54906
hsa-miR-125b-2-3p	DCAF12L1	139170
hsa-miR-125b-2-3p	FOXR2	139628
hsa-miR-125b-2-3p	CCSER1	401145
hsa-miR-125b-2-3p	BCL2L10	10017
hsa-miR-125b-2-3p	PTGS2	5743
hsa-miR-125b-2-3p	RRN3	54700
hsa-miR-125b-2-3p	GMFB	2764
hsa-miR-125b-2-3p	ZNF654	55279
hsa-miR-125b-2-3p	ACTR3	10096
hsa-miR-125b-2-3p	SMIM13	221710
hsa-miR-125b-2-3p	DEGS1	8560
hsa-miR-125b-2-3p	FNBP1	23048
hsa-miR-125b-2-3p	PCNX	22990
hsa-miR-125b-2-3p	FAM135A	57579
hsa-miR-125b-2-3p	SCML4	256380
hsa-miR-125b-2-3p	CDKN2B	1030
hsa-miR-125b-2-3p	ZAK	51776
hsa-miR-125b-2-3p	TAF11	6882
hsa-miR-125b-2-3p	NUCKS1	64710
hsa-miR-125b-2-3p	GORAB	92344
hsa-miR-125b-2-3p	MKRN3	7681
hsa-miR-125b-2-3p	SOX8	30812
hsa-miR-125b-2-3p	ARHGAP10	79658
hsa-miR-125b-2-3p	SCD	6319
hsa-miR-125b-2-3p	PRPF39	55015
hsa-miR-125b-2-3p	EEA1	8411
hsa-miR-125b-2-3p	SREK1	140890
hsa-miR-125b-2-3p	TMEM194B	100131211
hsa-miR-125b-2-3p	MDFIC	29969
hsa-miR-125b-2-3p	RP2	6102
hsa-miR-125b-2-3p	TRPC1	7220
hsa-miR-125b-2-3p	UGT2A1	10941
hsa-miR-125b-2-3p	MIS18BP1	55320
hsa-miR-125b-2-3p	CALCRL	10203
hsa-miR-125b-2-3p	SLC35F1	222553
hsa-miR-125b-2-3p	HERC3	8916
hsa-miR-125b-2-3p	SWAP70	23075
hsa-miR-125b-2-3p	RABIF	5877
hsa-miR-125b-2-3p	TNF	7124
hsa-miR-125b-2-3p	NPAT	4863
hsa-miR-125b-2-3p	GRID1	2894
hsa-miR-125b-2-3p	SGCB	6443
hsa-miR-125b-2-3p	CNIH1	10175
hsa-miR-125b-2-3p	USP47	55031
hsa-miR-125b-2-3p	ARHGAP42	143872
hsa-miR-125b-2-3p	TM9SF3	56889
hsa-miR-125b-2-3p	PMCH	5367
hsa-miR-125b-2-3p	SCN9A	6335
hsa-miR-125b-2-3p	C4orf27	54969
hsa-miR-125b-2-3p	CCNL2	81669
hsa-miR-125b-2-3p	PGRMC2	10424
hsa-miR-125b-2-3p	ZMYM4	9202
hsa-miR-125b-2-3p	MYCBP2	23077
hsa-miR-125b-2-3p	CSTB	1476
hsa-miR-125b-2-3p	ZYG11B	79699
hsa-miR-125b-2-3p	IGF1R	3480
hsa-miR-127-5p	RRAS2	22800
hsa-miR-127-5p	DUSP16	80824
hsa-miR-127-5p	PHACTR2	9749
hsa-miR-127-5p	BRCA1	672
hsa-miR-127-5p	PCSK2	5126
hsa-miR-127-5p	NRP1	8829
hsa-miR-127-5p	DRD1	1812
hsa-miR-127-5p	ELP3	55140
hsa-miR-127-5p	S100A7A	338324
hsa-miR-127-5p	CALN1	83698
hsa-miR-127-5p	CYLD	1540
hsa-miR-127-5p	GABRA2	2555
hsa-miR-127-5p	SPP1	6696
hsa-miR-127-5p	KCNA6	3742
hsa-miR-127-5p	TMPO	7112
hsa-miR-127-5p	PRKD3	23683
hsa-miR-127-5p	BOD1	91272
hsa-miR-127-5p	PSD3	23362
hsa-miR-127-5p	CNR1	1268
hsa-miR-127-5p	RAB6A	5870
hsa-miR-127-5p	CCPG1	9236
hsa-miR-127-5p	PDGFRB	5159
hsa-miR-127-5p	PHTF2	57157
hsa-miR-127-5p	C18orf25	147339
hsa-miR-127-5p	KCNAB1	7881
hsa-miR-127-5p	ZC3H6	376940
hsa-miR-127-5p	NCAM2	4685
hsa-miR-127-5p	SORBS2	8470
hsa-miR-127-5p	SH3GLB1	51100
hsa-miR-127-5p	UNC5B	219699
hsa-miR-127-5p	RUFY2	55680
hsa-miR-127-5p	CREM	1390
hsa-miR-127-5p	RNF6	6049
hsa-miR-127-5p	MATR3	9782
hsa-miR-127-5p	SLC7A1	6541
hsa-miR-127-5p	ZNF268	10795
hsa-miR-127-5p	USP46	64854
hsa-miR-127-5p	MLEC	9761
hsa-miR-127-5p	PER2	8864
hsa-miR-127-5p	FGF1	2246
hsa-miR-127-5p	DCUN1D2	55208
hsa-miR-127-5p	LRIT3	345193
hsa-miR-127-5p	HSDL2	84263
hsa-miR-127-5p	DDX3X	1654
hsa-miR-127-5p	GABRA4	2557
hsa-miR-127-5p	KCNQ3	3786
hsa-miR-127-5p	TRIM25	7706
hsa-miR-127-5p	METTL7A	25840
hsa-miR-127-5p	MYSM1	114803
hsa-miR-127-5p	AUTS2	26053
hsa-miR-127-5p	CYTH1	9267
hsa-miR-127-5p	PIK3R1	5295
hsa-miR-127-5p	ZMIZ1	57178
hsa-miR-127-5p	TMEM167A	153339
hsa-miR-127-5p	DEK	7913
hsa-miR-127-5p	ILDR2	387597
hsa-miR-127-5p	NEFM	4741
hsa-miR-127-5p	OPN5	221391
hsa-miR-127-5p	UBFD1	56061
hsa-miR-127-5p	FSCN1	6624
hsa-miR-127-5p	CNKSR2	22866
hsa-miR-127-5p	GPR61	83873
hsa-miR-127-5p	GPC6	10082
hsa-miR-127-5p	PHKG2	5261
hsa-miR-127-5p	RNF8	9025
hsa-miR-127-5p	RCBTB1	55213
hsa-miR-127-5p	LHFPL4	375323
hsa-miR-127-5p	FNDC1	84624
hsa-miR-127-5p	ZSCAN26	7741
hsa-miR-127-5p	ARMC8	25852
hsa-miR-127-5p	WDR31	114987
hsa-miR-127-5p	FBXO8	26269
hsa-miR-127-5p	RAD17	5884
hsa-miR-127-5p	UBE4A	9354
hsa-miR-127-5p	PPP1CC	5501
hsa-miR-127-5p	GPR126	57211
hsa-miR-127-5p	TMEM213	155006
hsa-miR-127-5p	NR4A3	8013
hsa-miR-127-5p	PRR23C	389152
hsa-miR-127-5p	NEK1	4750
hsa-miR-127-5p	CDHR3	222256
hsa-miR-127-5p	RPL37	6167
hsa-miR-127-5p	C11orf58	10944
hsa-miR-127-5p	MRPL11	65003
hsa-miR-127-5p	TKTL2	84076
hsa-miR-127-5p	PRMT3	10196
hsa-miR-127-5p	SLC24A1	9187
hsa-miR-127-5p	HMGB2	3148
hsa-miR-127-5p	LRRC20	55222
hsa-miR-127-5p	BEND4	389206
hsa-miR-127-5p	LYRM7	90624
hsa-miR-127-5p	SRD5A2	6716
hsa-miR-127-5p	LPP	4026
hsa-miR-127-5p	TLR7	51284
hsa-miR-127-5p	H6PD	9563
hsa-miR-127-5p	PPP1R3A	5506
hsa-miR-127-5p	ZDHHC15	158866
hsa-miR-127-5p	DDX3Y	8653
hsa-miR-127-5p	LCLAT1	253558
hsa-miR-127-5p	KIDINS220	57498
hsa-miR-127-5p	RPS6KA3	6197
hsa-miR-127-5p	G3BP2	9908
hsa-miR-127-5p	TROVE2	6738
hsa-miR-127-5p	ASCC3	10973
hsa-miR-127-5p	TRAK1	22906
hsa-miR-127-5p	DENND4A	10260
hsa-miR-127-5p	C1QA	712
hsa-miR-127-5p	DLGAP1	9229
hsa-miR-127-5p	HNRNPA2B1	3181
hsa-miR-127-5p	ANKRD33B	651746
hsa-miR-127-5p	C10orf137	26098
hsa-miR-127-5p	FCHO2	115548
hsa-miR-127-5p	PPHLN1	51535
hsa-miR-127-5p	PUM1	9698
hsa-miR-127-5p	PURB	5814
hsa-miR-127-5p	PRICKLE2	166336
hsa-miR-127-5p	KDELR2	11014
hsa-miR-127-5p	CDK15	65061
hsa-miR-127-5p	MINOS1	440574
hsa-miR-127-5p	SDF4	51150
hsa-miR-127-5p	MAP7D2	256714
hsa-miR-127-5p	KIAA1467	57613
hsa-miR-127-5p	SCML1	6322
hsa-miR-127-5p	MPRIP	23164
hsa-miR-127-5p	DDI2	84301
hsa-miR-127-5p	MLLT11	10962
hsa-miR-127-5p	TMEM50B	757
hsa-miR-127-5p	HOXA5	3202
hsa-miR-127-5p	SLC30A6	55676
hsa-miR-127-5p	ZNF814	730051
hsa-miR-127-5p	PLXNA4	91584
hsa-miR-127-5p	STAT4	6775
hsa-miR-127-5p	SYT2	127833
hsa-miR-127-5p	UHRF1BP1	54887
hsa-miR-127-5p	RAB3B	5865
hsa-miR-127-5p	SRGAP1	57522
hsa-miR-127-5p	SSR1	6745
hsa-miR-127-5p	GRAMD2	196996
hsa-miR-127-5p	CPSF6	11052
hsa-miR-127-5p	METTL8	79828
hsa-miR-127-5p	LIMD1	8994
hsa-miR-127-5p	C9orf129	445577
hsa-miR-127-5p	TBC1D15	64786
hsa-miR-127-5p	ZNF382	84911
hsa-miR-127-5p	RUNX2	860
hsa-miR-127-5p	PTPRO	5800
hsa-miR-127-5p	INSR	3643
hsa-miR-127-5p	KLLN	100144748
hsa-miR-127-5p	H2AFV	94239
hsa-miR-127-5p	IFIT3	3437
hsa-miR-127-5p	MAGEA10	4109
hsa-miR-127-5p	MCTS1	28985
hsa-miR-127-5p	PIFO	128344
hsa-miR-127-5p	RPP25	54913
hsa-miR-127-5p	PHF12	57649
hsa-miR-127-5p	SSTR2	6752
hsa-miR-127-5p	BTN2A1	11120
hsa-miR-127-5p	EDC3	80153
hsa-miR-127-5p	PEF1	553115
hsa-miR-127-5p	PCSK1	5122
hsa-miR-127-5p	PDXK	8566
hsa-miR-127-5p	ATP2B4	493
hsa-miR-127-5p	SULT1C2	6819
hsa-miR-127-5p	SEPT8	23176
hsa-miR-127-5p	GGACT	87769
hsa-miR-127-5p	RER1	11079
hsa-miR-127-5p	KPNA5	3841
hsa-miR-127-5p	GAB1	2549
hsa-miR-127-5p	CCDC173	129881
hsa-miR-127-5p	PID1	55022
hsa-miR-127-5p	LMBR1	64327
hsa-miR-127-5p	PTPRT	11122
hsa-miR-127-5p	GCM2	9247
hsa-miR-127-5p	ACLY	47
hsa-miR-127-5p	USO1	8615
hsa-miR-127-5p	ATP5B	506
hsa-miR-127-5p	SHC3	53358
hsa-miR-127-5p	KANSL1	284058
hsa-miR-127-5p	SH3TC2	79628
hsa-miR-127-5p	IL17A	3605
hsa-miR-127-5p	TFPI	7035
hsa-miR-127-5p	CAMSAP2	23271
hsa-miR-127-5p	CDH11	1009
hsa-miR-127-5p	ABCD3	5825
hsa-miR-127-5p	CMTR2	55783
hsa-miR-127-5p	TBX22	50945
hsa-miR-127-5p	RASGRF2	5924
hsa-miR-127-5p	SEC62	7095
hsa-miR-127-5p	GK5	256356
hsa-miR-127-5p	TM2D3	80213
hsa-miR-127-5p	BLVRB	645
hsa-miR-127-5p	CLDN22	53842
hsa-miR-127-5p	HLTF	6596
hsa-miR-127-5p	TLL1	7092
hsa-miR-127-5p	RPGRIP1L	23322
hsa-miR-127-5p	N4BP2L1	90634
hsa-miR-127-5p	RGL1	23179
hsa-miR-127-5p	RAB1A	5861
hsa-miR-127-5p	NEUROD1	4760
hsa-miR-127-5p	ADAT2	134637
hsa-miR-127-5p	MC2R	4158
hsa-miR-127-5p	CCDC25	55246
hsa-miR-127-5p	RB1	5925
hsa-miR-127-5p	GPR137B	7107
hsa-miR-127-5p	SLC19A3	80704
hsa-miR-127-5p	TRDMT1	1787
hsa-miR-127-5p	GPRIN3	285513
hsa-miR-127-5p	ITGB8	3696
hsa-miR-127-5p	PAH	5053
hsa-miR-127-5p	CACUL1	143384
hsa-miR-127-5p	MMP13	4322
hsa-miR-127-5p	DENND1B	163486
hsa-miR-127-5p	RGS7	6000
hsa-miR-127-5p	IQCH	64799
hsa-miR-127-5p	UBE2E2	7325
hsa-miR-132-5p	AR	367
hsa-miR-132-5p	DUSP7	1849
hsa-miR-132-5p	PCDH9	5101
hsa-miR-132-5p	SCD	6319
hsa-miR-132-5p	SLC9A2	6549
hsa-miR-132-5p	SSTR1	6751
hsa-miR-132-5p	TRAF6	7189
hsa-miR-132-5p	YAF2	10138
hsa-miR-132-5p	SAP18	10284
hsa-miR-132-5p	CYP26B1	56603
hsa-miR-132-5p	WIZ	58525
hsa-miR-132-5p	C17orf72	92340
hsa-miR-132-5p	IRX2	153572
hsa-miR-132-5p	FOXO1	2308
hsa-miR-136-3p	IGF2R	3482
hsa-miR-136-3p	SLC14A1	6563
hsa-miR-136-3p	STC1	6781
hsa-miR-136-3p	TGFB2	7042
hsa-miR-136-3p	THBS2	7058
hsa-miR-136-3p	TP63	8626
hsa-miR-136-3p	USP14	9097
hsa-miR-136-3p	NCR2	9436
hsa-miR-136-3p	SMCHD1	23347
hsa-miR-136-3p	FJX1	24147
hsa-miR-136-3p	GCA	25801
hsa-miR-136-3p	EMCN	51705
hsa-miR-136-3p	MBNL3	55796
hsa-miR-136-3p	PRKRIP1	79706
hsa-miR-136-3p	SPRY4	81848
hsa-miR-136-3p	ZBTB37	84614
hsa-miR-136-3p	NADK2	133686
hsa-miR-136-3p	TOR1AIP2	163590
hsa-miR-136-3p	VSTM4	196740
hsa-miR-136-3p	ZNF585A	199704
hsa-miR-136-3p	RIMKLA	284716
hsa-miR-136-3p	SLC35E4	339665
hsa-miR-136-3p	NOTCH3	4854
hsa-miR-143-3p	ABL2	27
hsa-miR-143-3p	AIRE	326
hsa-miR-143-3p	ATP6V1A	523
hsa-miR-143-3p	AZGP1	563
hsa-miR-143-3p	BMPR1A	657
hsa-miR-143-3p	KLF5	688
hsa-miR-143-3p	CACNA1A	773
hsa-miR-143-3p	CDK1	983
hsa-miR-143-3p	CPB2	1361
hsa-miR-143-3p	DLG3	1741
hsa-miR-143-3p	ETV3	2117
hsa-miR-143-3p	ETV6	2120
hsa-miR-143-3p	FGF9	2254
hsa-miR-143-3p	FOSL2	2355
hsa-miR-143-3p	GABRA4	2557
hsa-miR-143-3p	GABRB3	2562
hsa-miR-143-3p	GATM	2628
hsa-miR-143-3p	GOT1	2805
hsa-miR-143-3p	HK2	3099
hsa-miR-143-3p	HLA-DOA	3111
hsa-miR-143-3p	HLA-DPB1	3115
hsa-miR-143-3p	IFIT3	3437
hsa-miR-143-3p	IGFBP5	3488
hsa-miR-143-3p	ITGA6	3655
hsa-miR-143-3p	ITGB8	3696
hsa-miR-143-3p	KCNN3	3782
hsa-miR-143-3p	KRAS	3845
hsa-miR-143-3p	LMO7	4008
hsa-miR-143-3p	CAPRIN1	4076
hsa-miR-143-3p	MFAP3	4238
hsa-miR-143-3p	MGP	4256
hsa-miR-143-3p	MIP	4284
hsa-miR-143-3p	AFF1	4299
hsa-miR-143-3p	MLLT3	4300
hsa-miR-143-3p	MYO5A	4644
hsa-miR-143-3p	MYO6	4646
hsa-miR-143-3p	NFATC1	4772
hsa-miR-143-3p	NPTX1	4884
hsa-miR-143-3p	PC	5091
hsa-miR-143-3p	PCMT1	5110
hsa-miR-143-3p	PDK1	5163
hsa-miR-143-3p	PKD2	5311
hsa-miR-143-3p	POLH	5429
hsa-miR-143-3p	PRKX	5613
hsa-miR-143-3p	PSEN1	5663
hsa-miR-143-3p	PSG1	5669
hsa-miR-143-3p	PSG4	5672
hsa-miR-143-3p	PSG7	5676
hsa-miR-143-3p	PTPN11	5781
hsa-miR-143-3p	RAB27A	5873
hsa-miR-143-3p	RASGRF2	5924
hsa-miR-143-3p	SC5D	6309
hsa-miR-143-3p	SLC1A2	6506
hsa-miR-143-3p	SLC5A3	6526
hsa-miR-143-3p	SLC16A2	6567
hsa-miR-143-3p	SRD5A1	6715
hsa-miR-143-3p	STAC	6769
hsa-miR-143-3p	SULT1E1	6783
hsa-miR-143-3p	STXBP1	6812
hsa-miR-143-3p	MAP3K7	6885
hsa-miR-143-3p	THRB	7068
hsa-miR-143-3p	TLR2	7097
hsa-miR-143-3p	TPM3	7170
hsa-miR-143-3p	TTPA	7274
hsa-miR-143-3p	TUB	7275
hsa-miR-143-3p	UBE2E1	7324
hsa-miR-143-3p	VHL	7428
hsa-miR-143-3p	WHSC1	7468
hsa-miR-143-3p	XK	7504
hsa-miR-143-3p	ZNF182	7569
hsa-miR-143-3p	ZNF200	7752
hsa-miR-143-3p	MOGS	7841
hsa-miR-143-3p	LHX3	8022
hsa-miR-143-3p	LMO4	8543
hsa-miR-143-3p	DEGS1	8560
hsa-miR-143-3p	UNC5C	8633
hsa-miR-143-3p	NUMB	8650
hsa-miR-143-3p	RNMT	8731
hsa-miR-143-3p	GYG2	8908
hsa-miR-143-3p	SEMA5A	9037
hsa-miR-143-3p	NEURL	9148
hsa-miR-143-3p	DCLK1	9201
hsa-miR-143-3p	VAPB	9217
hsa-miR-143-3p	SRSF11	9295
hsa-miR-143-3p	COPS2	9318
hsa-miR-143-3p	QKI	9444
hsa-miR-143-3p	ITM2B	9445
hsa-miR-143-3p	EIF2AK3	9451
hsa-miR-143-3p	AKAP5	9495
hsa-miR-143-3p	BAG3	9531
hsa-miR-143-3p	KIAA0408	9729
hsa-miR-143-3p	RIMS3	9783
hsa-miR-143-3p	EPM2AIP1	9852
hsa-miR-143-3p	SLC25A15	10166
hsa-miR-143-3p	INADL	10207
hsa-miR-143-3p	UBE2E3	10477
hsa-miR-143-3p	HBS1L	10767
hsa-miR-143-3p	AHCYL1	10768
hsa-miR-143-3p	WASF3	10810
hsa-miR-143-3p	GPR83	10888
hsa-miR-143-3p	SRSF8	10929
hsa-miR-143-3p	VAX1	11023
hsa-miR-143-3p	PTPRT	11122
hsa-miR-143-3p	PROSC	11212
hsa-miR-143-3p	KLF12	11278
hsa-miR-143-3p	VASH1	22846
hsa-miR-143-3p	DIS3	22894
hsa-miR-143-3p	PSME4	23198
hsa-miR-143-3p	WDR7	23335
hsa-miR-143-3p	SIRT5	23408
hsa-miR-143-3p	TARDBP	23435
hsa-miR-143-3p	SLC7A11	23657
hsa-miR-143-3p	AIPL1	23746
hsa-miR-143-3p	FTSJ1	24140
hsa-miR-143-3p	DSTYK	25778
hsa-miR-143-3p	ABHD14A	25864
hsa-miR-143-3p	NSL1	25936
hsa-miR-143-3p	NECAP1	25977
hsa-miR-143-3p	SETBP1	26040
hsa-miR-143-3p	GIGYF2	26058
hsa-miR-143-3p	ARFGAP3	26286
hsa-miR-143-3p	GNL3	26354
hsa-miR-143-3p	AGO1	26523
hsa-miR-143-3p	DISC1	27185
hsa-miR-143-3p	HIPK2	28996
hsa-miR-143-3p	ZBTB44	29068
hsa-miR-143-3p	TMOD2	29767
hsa-miR-143-3p	SLC39A3	29985
hsa-miR-143-3p	UTP18	51096
hsa-miR-143-3p	ZDHHC9	51114
hsa-miR-143-3p	COMMD2	51122
hsa-miR-143-3p	TMEM69	51249
hsa-miR-143-3p	GOLM1	51280
hsa-miR-143-3p	HECA	51696
hsa-miR-143-3p	SIX4	51804
hsa-miR-143-3p	CLDN22	53842
hsa-miR-143-3p	MYO3A	53904
hsa-miR-143-3p	SLC38A2	54407
hsa-miR-143-3p	OTUD4	54726
hsa-miR-143-3p	XAF1	54739
hsa-miR-143-3p	TMEM214	54867
hsa-miR-143-3p	ZWILCH	55055
hsa-miR-143-3p	ATG2B	55102
hsa-miR-143-3p	SYNJ2BP	55333
hsa-miR-143-3p	ELMOD1	55531
hsa-miR-143-3p	ASAP3	55616
hsa-miR-143-3p	HHAT	55733
hsa-miR-143-3p	PAG1	55824
hsa-miR-143-3p	WWC3	55841
hsa-miR-143-3p	TMX4	56255
hsa-miR-143-3p	IL36G	56300
hsa-miR-143-3p	ATP10A	57194
hsa-miR-143-3p	RAB22A	57403
hsa-miR-143-3p	KIAA1432	57589
hsa-miR-143-3p	DIP2B	57609
hsa-miR-143-3p	DHX37	57647
hsa-miR-143-3p	SFMBT2	57713
hsa-miR-143-3p	SCUBE2	57758
hsa-miR-143-3p	CREBZF	58487
hsa-miR-143-3p	HRH4	59340
hsa-miR-143-3p	BLOC1S5	63915
hsa-miR-143-3p	CLSPN	63967
hsa-miR-143-3p	ATL2	64225
hsa-miR-143-3p	PAPD5	64282
hsa-miR-143-3p	S100PBP	64766
hsa-miR-143-3p	MEAF6	64769
hsa-miR-143-3p	PCDH15	65217
hsa-miR-143-3p	FUNDC2	65991
hsa-miR-143-3p	SLC2A11	66035
hsa-miR-143-3p	CRELD1	78987
hsa-miR-143-3p	MANEA	79694
hsa-miR-143-3p	SIKE1	80143
hsa-miR-143-3p	OPA3	80207
hsa-miR-143-3p	TET1	80312
hsa-miR-143-3p	RNF170	81790
hsa-miR-143-3p	KATNAL2	83473
hsa-miR-143-3p	CALN1	83698
hsa-miR-143-3p	KRTAP9-3	83900
hsa-miR-143-3p	PHF6	84295
hsa-miR-143-3p	DCTN5	84516
hsa-miR-143-3p	MEDAG	84935
hsa-miR-143-3p	PHYKPL	85007
hsa-miR-143-3p	USP45	85015
hsa-miR-143-3p	MEX3A	92312
hsa-miR-143-3p	SFXN1	94081
hsa-miR-143-3p	WDR89	112840
hsa-miR-143-3p	SCAMP4	113178
hsa-miR-143-3p	ZIM3	114026
hsa-miR-143-3p	PALM2	114299
hsa-miR-143-3p	MARCH3	115123
hsa-miR-143-3p	BATF2	116071
hsa-miR-143-3p	ZNF526	116115
hsa-miR-143-3p	COX20	116228
hsa-miR-143-3p	TMEM132D	121256
hsa-miR-143-3p	MSI2	124540
hsa-miR-143-3p	CCDC58	131076
hsa-miR-143-3p	UBXN2B	137886
hsa-miR-143-3p	TAF1L	138474
hsa-miR-143-3p	UPRT	139596
hsa-miR-143-3p	SAMD8	142891
hsa-miR-143-3p	RDH12	145226
hsa-miR-143-3p	MIPOL1	145282
hsa-miR-143-3p	UNC45B	146862
hsa-miR-143-3p	EME1	146956
hsa-miR-143-3p	WIPF2	147179
hsa-miR-143-3p	ZNF583	147949
hsa-miR-143-3p	C1orf74	148304
hsa-miR-143-3p	AMOTL1	154810
hsa-miR-143-3p	USP54	159195
hsa-miR-143-3p	ALDH1L2	160428
hsa-miR-143-3p	GPR180	160897
hsa-miR-143-3p	DENND1B	163486
hsa-miR-143-3p	TOR1AIP2	163590
hsa-miR-143-3p	SLC30A8	169026
hsa-miR-143-3p	SLC39A11	201266
hsa-miR-143-3p	RBM24	221662
hsa-miR-143-3p	FAM200A	221786
hsa-miR-143-3p	LACE1	246269
hsa-miR-143-3p	TECRL	253017
hsa-miR-143-3p	COL24A1	255631
hsa-miR-143-3p	PAN3	255967
hsa-miR-143-3p	CCDC110	256309
hsa-miR-143-3p	KSR2	283455
hsa-miR-143-3p	GXYLT1	283464
hsa-miR-143-3p	SYT10	341359
hsa-miR-143-3p	FMN1	342184
hsa-miR-143-3p	SPATA12	353324
hsa-miR-143-3p	PTPRQ	374462
hsa-miR-143-3p	SOGA3	387104
hsa-miR-143-3p	SH2D4B	387694
hsa-miR-143-3p	C12orf76	400073
hsa-miR-143-3p	PSG8	440533
hsa-miR-143-3p	DUXA	503835
hsa-miR-143-3p	TMEM242	729515
hsa-miR-143-3p	TMEM178B	100507421
hsa-miR-143-3p	LOC100509457	100509457
hsa-miR-143-3p	DNMT3A	1788
hsa-miR-143-3p	FNDC3B	64778
[truncated: 11,027 more rows]

## Sheet:  Blue
miRNA	Target Gene	EntrezID
hsa-miR-1249-3p	PTCH1	5727
hsa-miR-125a-5p	AAK1	22848
hsa-miR-125a-5p	ACER2	340485
hsa-miR-125a-5p	ADPRH	141
hsa-miR-125a-5p	AGGF1	55109
hsa-miR-125a-5p	ALPK3	57538
hsa-miR-125a-5p	ANAPC16	119504
hsa-miR-125a-5p	ANKRD26	22852
hsa-miR-125a-5p	ANKRD33B	651746
hsa-miR-125a-5p	ANKRD42	338699
hsa-miR-125a-5p	AP5Z1	9907
hsa-miR-125a-5p	ARHGAP40	343578
hsa-miR-125a-5p	ARID3B	10620
hsa-miR-125a-5p	ARMC7	79637
hsa-miR-125a-5p	ARRB1	408
hsa-miR-125a-5p	ARSD	414
hsa-miR-125a-5p	ASB11	140456
hsa-miR-125a-5p	ASPH	444
hsa-miR-125a-5p	ATP10D	57205
hsa-miR-125a-5p	BAK1	578
hsa-miR-125a-5p	BAP1	8314
hsa-miR-125a-5p	BIN2	51411
hsa-miR-125a-5p	C10orf54	64115
hsa-miR-125a-5p	C11orf21	29125
hsa-miR-125a-5p	C17orf51	339263
hsa-miR-125a-5p	C19orf38	255809
hsa-miR-125a-5p	C19orf54	284325
hsa-miR-125a-5p	C2orf43	60526
hsa-miR-125a-5p	C9orf170	401535
hsa-miR-125a-5p	CCDC142	84865
hsa-miR-125a-5p	CCNJ	54619
hsa-miR-125a-5p	CCR5	1234
hsa-miR-125a-5p	CD69	969
hsa-miR-125a-5p	CEP164	22897
hsa-miR-125a-5p	CGN	57530
hsa-miR-125a-5p	COL4A3	1285
hsa-miR-125a-5p	CRB2	286204
hsa-miR-125a-5p	CTU1	90353
hsa-miR-125a-5p	CXCL13	10563
hsa-miR-125a-5p	CYB561D1	284613
hsa-miR-125a-5p	CYTH2	9266
hsa-miR-125a-5p	DIP2A	23181
hsa-miR-125a-5p	DLD	1738
hsa-miR-125a-5p	DRAM2	128338
hsa-miR-125a-5p	DUS1L	64118
hsa-miR-125a-5p	DYNLT3	6990
hsa-miR-125a-5p	E2F2	1870
hsa-miR-125a-5p	ELAC2	60528
hsa-miR-125a-5p	ENPEP	2028
hsa-miR-125a-5p	ENPP1	5167
hsa-miR-125a-5p	EPO	2056
hsa-miR-125a-5p	ETV6	2120
hsa-miR-125a-5p	EVA1A	84141
hsa-miR-125a-5p	FAM118A	55007
hsa-miR-125a-5p	FAM169B	283777
hsa-miR-125a-5p	FAM178B	51252
hsa-miR-125a-5p	FAM71D	161142
hsa-miR-125a-5p	FBXW4	6468
hsa-miR-125a-5p	FGF5	2250
hsa-miR-125a-5p	FIBP	9158
hsa-miR-125a-5p	FMO2	2327
hsa-miR-125a-5p	FREM1	158326
hsa-miR-125a-5p	FRMPD4	9758
hsa-miR-125a-5p	FUT4	2526
hsa-miR-125a-5p	GCNT1	2650
hsa-miR-125a-5p	GK5	256356
hsa-miR-125a-5p	GORASP1	64689
hsa-miR-125a-5p	GTF3C3	9330
hsa-miR-125a-5p	GTPBP2	54676
hsa-miR-125a-5p	HIF1AN	55662
hsa-miR-125a-5p	IBA57	200205
hsa-miR-125a-5p	IER3IP1	51124
hsa-miR-125a-5p	IL16	3603
hsa-miR-125a-5p	IL22RA1	58985
hsa-miR-125a-5p	IL31	386653
hsa-miR-125a-5p	IRF4	3662
hsa-miR-125a-5p	IST1	9798
hsa-miR-125a-5p	KCNA7	3743
hsa-miR-125a-5p	KCTD15	79047
hsa-miR-125a-5p	KLF13	51621
hsa-miR-125a-5p	KLHL31	401265
hsa-miR-125a-5p	KLHL6	89857
hsa-miR-125a-5p	KLRC2	3822
hsa-miR-125a-5p	KPNA6	23633
hsa-miR-125a-5p	LACTB	114294
hsa-miR-125a-5p	LFNG	3955
hsa-miR-125a-5p	LIN28A	79727
hsa-miR-125a-5p	MAGOHB	55110
hsa-miR-125a-5p	MAP2K7	5609
hsa-miR-125a-5p	MAP3K11	4296
hsa-miR-125a-5p	MAP3K13	9175
hsa-miR-125a-5p	MAPKAPK2	9261
hsa-miR-125a-5p	MCL1	4170
hsa-miR-125a-5p	MED20	9477
hsa-miR-125a-5p	MFHAS1	9258
hsa-miR-125a-5p	MFN1	55669
hsa-miR-125a-5p	MRAP	56246
hsa-miR-125a-5p	MRPL30	51263
hsa-miR-125a-5p	MS4A3	932
hsa-miR-125a-5p	MTF1	4520
hsa-miR-125a-5p	MTFP1	51537
hsa-miR-125a-5p	MTMR6	9107
hsa-miR-125a-5p	MYT1	4661
hsa-miR-125a-5p	NAIF1	203245
hsa-miR-125a-5p	NCR3LG1	374383
hsa-miR-125a-5p	NECAB3	63941
hsa-miR-125a-5p	NIN	51199
hsa-miR-125a-5p	NIPAL4	348938
hsa-miR-125a-5p	NPL	80896
hsa-miR-125a-5p	NSL1	25936
hsa-miR-125a-5p	OAZ2	4947
hsa-miR-125a-5p	OSBPL9	114883
hsa-miR-125a-5p	P2RY8	286530
hsa-miR-125a-5p	PCTP	58488
hsa-miR-125a-5p	PDZD3	79849
hsa-miR-125a-5p	PODXL	5420
hsa-miR-125a-5p	POFUT2	23275
hsa-miR-125a-5p	PPAT	5471
hsa-miR-125a-5p	PPP1R12B	4660
hsa-miR-125a-5p	PRAMEF18	391003
hsa-miR-125a-5p	PRAMEF19	645414
hsa-miR-125a-5p	PRAMEF3	401940
hsa-miR-125a-5p	PRELID2	153768
hsa-miR-125a-5p	PRRC1	133619
hsa-miR-125a-5p	PRTG	283659
hsa-miR-125a-5p	PSG4	5672
hsa-miR-125a-5p	PSMD9	5715
hsa-miR-125a-5p	PXMP4	11264
hsa-miR-125a-5p	RAB37	326624
hsa-miR-125a-5p	RAB3D	9545
hsa-miR-125a-5p	RASGRF2	5924
hsa-miR-125a-5p	RAX	30062
hsa-miR-125a-5p	RBM20	282996
hsa-miR-125a-5p	RFXANK	8625
hsa-miR-125a-5p	RPL28	6158
hsa-miR-125a-5p	RS1	6247
hsa-miR-125a-5p	RTP1	132112
hsa-miR-125a-5p	RUFY3	22902
hsa-miR-125a-5p	SBNO1	55206
hsa-miR-125a-5p	SCARB1	949
hsa-miR-125a-5p	SCARB2	950
hsa-miR-125a-5p	SCN4A	6329
hsa-miR-125a-5p	SEC61A2	55176
hsa-miR-125a-5p	SEMA4D	10507
hsa-miR-125a-5p	SFXN2	118980
hsa-miR-125a-5p	SH3TC2	79628
hsa-miR-125a-5p	SIRT5	23408
hsa-miR-125a-5p	SLC35A4	113829
hsa-miR-125a-5p	SLC37A2	219855
hsa-miR-125a-5p	SLC39A9	55334
hsa-miR-125a-5p	SLC46A3	283537
hsa-miR-125a-5p	SLC4A10	57282
hsa-miR-125a-5p	SLC6A15	55117
hsa-miR-125a-5p	SLC7A1	6541
hsa-miR-125a-5p	SLITRK6	84189
hsa-miR-125a-5p	SMCR8	140775
hsa-miR-125a-5p	SMEK1	55671
hsa-miR-125a-5p	SOX30	11063
hsa-miR-125a-5p	SP5	389058
hsa-miR-125a-5p	SSTR3	6753
hsa-miR-125a-5p	STARD13	90627
hsa-miR-125a-5p	SUV39H1	6839
hsa-miR-125a-5p	SYVN1	84447
hsa-miR-125a-5p	TAF9B	51616
hsa-miR-125a-5p	TGOLN2	10618
hsa-miR-125a-5p	THEMIS2	9473
hsa-miR-125a-5p	TMEM120B	144404
hsa-miR-125a-5p	TMEM135	65084
hsa-miR-125a-5p	TMEM168	64418
hsa-miR-125a-5p	TMEM177	80775
hsa-miR-125a-5p	TMLHE	55217
hsa-miR-125a-5p	TMPRSS13	84000
hsa-miR-125a-5p	TNFAIP3	7128
hsa-miR-125a-5p	TNFSF4	7292
hsa-miR-125a-5p	TOR2A	27433
hsa-miR-125a-5p	TRIM71	131405
hsa-miR-125a-5p	TRMT5	57570
hsa-miR-125a-5p	TTC19	54902
hsa-miR-125a-5p	TTC7A	57217
hsa-miR-125a-5p	TTPA	7274
hsa-miR-125a-5p	UBE2R2	54926
hsa-miR-125a-5p	UBN1	29855
hsa-miR-125a-5p	UCK2	7371
hsa-miR-125a-5p	VAX1	11023
hsa-miR-125a-5p	VPS4B	9525
hsa-miR-125a-5p	WARS	7453
hsa-miR-125a-5p	ZC3H7B	23264
hsa-miR-125a-5p	ZNF343	79175
hsa-miR-125a-5p	ZNF543	125919
hsa-miR-125a-5p	ZNF546	339327
hsa-miR-125a-5p	ZNF559-ZNF177	100529215
hsa-miR-125a-5p	ZNF624	57547
hsa-miR-125a-5p	ZNF652	22834
hsa-miR-125a-5p	ZNF704	619279
hsa-miR-125a-5p	ZNF75D	7626
hsa-miR-125a-5p	ZNF792	126375
hsa-miR-125a-5p	ZSCAN22	342945
hsa-miR-125a-5p	ZSCAN29	146050
hsa-miR-125a-5p	ZSWIM6	57688
hsa-miR-125a-5p	CDKN1A	1026
hsa-miR-125a-5p	NTRK3	4916
hsa-miR-125a-5p	CD34	947
hsa-miR-125a-5p	TP53	7157
hsa-miR-125a-5p	VEGFA	7422
hsa-miR-125a-5p	ERBB3	2065
hsa-miR-125a-5p	ERBB2	2064
hsa-miR-125a-5p	ELAVL1	1994
hsa-miR-125a-5p	SMAD4	4089
hsa-miR-125a-5p	MMP11	4320
hsa-miR-125a-5p	HK2	3099
hsa-miR-125a-5p	EIF4EBP1	1978
hsa-miR-125a-5p	LIFR	3977
hsa-miR-125a-5p	EGFR	1956
hsa-miR-125a-5p	BCL2L12	83596
hsa-miR-125a-5p	BCL2	596
hsa-miR-125a-5p	IFNG	3458
hsa-miR-125a-5p	ESRRA	2101
hsa-miR-125a-5p	TRAF6	7189
hsa-miR-125a-5p	VPS51	738
hsa-miR-125a-5p	SIRT7	51547
hsa-miR-125a-5p	CLEC5A	23601
hsa-miR-125a-5p	GALNT14	79623
hsa-miR-125a-5p	STAT3	6774
hsa-miR-125a-5p	MAPK14	1432
hsa-miR-125a-5p	EDN1	1906
hsa-miR-125a-5p	CASP2	835
hsa-miR-125a-5p	DLL4	54567
hsa-miR-125a-5p	ABL2	27
hsa-miR-125a-5p	TAZ	6901
hsa-miR-125a-5p	HAX1	10456
hsa-miR-125a-5p	ZBTB7A	51341
hsa-miR-125a-5p	HDAC4	9759
hsa-miR-125a-5p	PIK3CG	5294
hsa-miR-125a-5p	AKT1	207
hsa-miR-125a-5p	MTOR	2475
hsa-miR-125a-5p	MEG3	55384
hsa-miR-125a-5p	HDAC5	10014
hsa-miR-125a-5p	RAF1	5894
hsa-miR-125a-5p	E2F3	1871
hsa-miR-125a-5p	JAK2	3717
hsa-miR-125a-5p	SMAD2	4087
hsa-miR-125a-5p	ARID3A	1820
hsa-miR-125b-5p	AAK1	22848
hsa-miR-125b-5p	ACER2	340485
hsa-miR-125b-5p	ADPRH	141
hsa-miR-125b-5p	AGGF1	55109
hsa-miR-125b-5p	ALPK3	57538
hsa-miR-125b-5p	ANAPC16	119504
hsa-miR-125b-5p	ANKRD26	22852
hsa-miR-125b-5p	ANKRD33B	651746
hsa-miR-125b-5p	ANKRD42	338699
hsa-miR-125b-5p	AP5Z1	9907
hsa-miR-125b-5p	ARHGAP40	343578
hsa-miR-125b-5p	ARID3B	10620
hsa-miR-125b-5p	ARMC7	79637
hsa-miR-125b-5p	ARRB1	408
hsa-miR-125b-5p	ARSD	414
hsa-miR-125b-5p	ASB11	140456
hsa-miR-125b-5p	ASPH	444
hsa-miR-125b-5p	ATP10D	57205
hsa-miR-125b-5p	BAK1	578
hsa-miR-125b-5p	BAP1	8314
hsa-miR-125b-5p	BIN2	51411
hsa-miR-125b-5p	C11orf21	29125
hsa-miR-125b-5p	C17orf51	339263
hsa-miR-125b-5p	C19orf38	255809
hsa-miR-125b-5p	C19orf54	284325
hsa-miR-125b-5p	C2orf43	60526
hsa-miR-125b-5p	C3orf80	401097
hsa-miR-125b-5p	C9orf170	401535
hsa-miR-125b-5p	CCNJ	54619
hsa-miR-125b-5p	CCR5	1234
hsa-miR-125b-5p	CD69	969
hsa-miR-125b-5p	CEP164	22897
hsa-miR-125b-5p	CGN	57530
hsa-miR-125b-5p	COL4A3	1285
hsa-miR-125b-5p	CRB2	286204
hsa-miR-125b-5p	CTU1	90353
hsa-miR-125b-5p	CXCL13	10563
hsa-miR-125b-5p	CYB561D1	284613
hsa-miR-125b-5p	CYTH2	9266
hsa-miR-125b-5p	DIP2A	23181
hsa-miR-125b-5p	DLD	1738
hsa-miR-125b-5p	DRAM2	128338
hsa-miR-125b-5p	DUS1L	64118
hsa-miR-125b-5p	DYNLT3	6990
hsa-miR-125b-5p	E2F2	1870
hsa-miR-125b-5p	ELAC2	60528
hsa-miR-125b-5p	ENPEP	2028
hsa-miR-125b-5p	ENPP1	5167
hsa-miR-125b-5p	EPO	2056
hsa-miR-125b-5p	ETV6	2120
hsa-miR-125b-5p	EVA1A	84141
hsa-miR-125b-5p	FAM118A	55007
hsa-miR-125b-5p	FAM169B	283777
hsa-miR-125b-5p	FAM71D	161142
hsa-miR-125b-5p	FBXW4	6468
hsa-miR-125b-5p	FGF5	2250
hsa-miR-125b-5p	FIBP	9158
hsa-miR-125b-5p	FMO2	2327
hsa-miR-125b-5p	FREM1	158326
hsa-miR-125b-5p	FRMPD4	9758
hsa-miR-125b-5p	FUT4	2526
hsa-miR-125b-5p	GCNT1	2650
hsa-miR-125b-5p	GK5	256356
hsa-miR-125b-5p	GORASP1	64689
hsa-miR-125b-5p	GTF3C3	9330
hsa-miR-125b-5p	GTPBP2	54676
hsa-miR-125b-5p	HIF1AN	55662
hsa-miR-125b-5p	IBA57	200205
hsa-miR-125b-5p	IER3IP1	51124
hsa-miR-125b-5p	IL16	3603
hsa-miR-125b-5p	IRF4	3662
hsa-miR-125b-5p	IST1	9798
hsa-miR-125b-5p	KBTBD13	390594
hsa-miR-125b-5p	KCNA7	3743
hsa-miR-125b-5p	KCTD15	79047
hsa-miR-125b-5p	KIAA1644	85352
hsa-miR-125b-5p	KLF13	51621
hsa-miR-125b-5p	KLHL31	401265
hsa-miR-125b-5p	KLHL6	89857
hsa-miR-125b-5p	KLRC2	3822
hsa-miR-125b-5p	KPNA6	23633
hsa-miR-125b-5p	LACTB	114294
hsa-miR-125b-5p	LFNG	3955
hsa-miR-125b-5p	LIN28A	79727
hsa-miR-125b-5p	MAP2K7	5609
hsa-miR-125b-5p	MAP3K13	9175
hsa-miR-125b-5p	MAPKAPK2	9261
hsa-miR-125b-5p	MCL1	4170
hsa-miR-125b-5p	MED20	9477
hsa-miR-125b-5p	MFHAS1	9258
hsa-miR-125b-5p	MFN1	55669
hsa-miR-125b-5p	MRAP	56246
hsa-miR-125b-5p	MRPL30	51263
hsa-miR-125b-5p	MS4A3	932
hsa-miR-125b-5p	MTF1	4520
hsa-miR-125b-5p	MTFP1	51537
hsa-miR-125b-5p	MTMR6	9107
hsa-miR-125b-5p	MYT1	4661
hsa-miR-125b-5p	NAIF1	203245
hsa-miR-125b-5p	NCR3LG1	374383
hsa-miR-125b-5p	NECAB3	63941
hsa-miR-125b-5p	NEU1	4758
hsa-miR-125b-5p	NIPAL4	348938
hsa-miR-125b-5p	NPL	80896
hsa-miR-125b-5p	NSL1	25936
hsa-miR-125b-5p	OAZ2	4947
hsa-miR-125b-5p	OSBPL9	114883
hsa-miR-125b-5p	P2RY8	286530
hsa-miR-125b-5p	PCTP	58488
hsa-miR-125b-5p	PDZD3	79849
hsa-miR-125b-5p	PODXL	5420
hsa-miR-125b-5p	PPAT	5471
hsa-miR-125b-5p	PPP1R12B	4660
hsa-miR-125b-5p	PRAMEF18	391003
hsa-miR-125b-5p	PRAMEF19	645414
hsa-miR-125b-5p	PRAMEF3	401940
hsa-miR-125b-5p	PRELID2	153768
hsa-miR-125b-5p	PRRC1	133619
hsa-miR-125b-5p	PRTG	283659
hsa-miR-125b-5p	PSG4	5672
hsa-miR-125b-5p	PSMD9	5715
hsa-miR-125b-5p	PXMP4	11264
hsa-miR-125b-5p	RAB3D	9545
hsa-miR-125b-5p	RASGRF2	5924
hsa-miR-125b-5p	RAX	30062
hsa-miR-125b-5p	RBM20	282996
hsa-miR-125b-5p	RFXANK	8625
hsa-miR-125b-5p	RPL28	6158
hsa-miR-125b-5p	RTP1	132112
hsa-miR-125b-5p	RUFY3	22902
hsa-miR-125b-5p	SBNO1	55206
hsa-miR-125b-5p	SCARB2	950
hsa-miR-125b-5p	SCN4A	6329
hsa-miR-125b-5p	SEC61A2	55176
hsa-miR-125b-5p	SEMA4D	10507
hsa-miR-125b-5p	SFXN2	118980
hsa-miR-125b-5p	SH3TC2	79628
hsa-miR-125b-5p	SIRT5	23408
hsa-miR-125b-5p	SLC35A4	113829
hsa-miR-125b-5p	SLC37A2	219855
hsa-miR-125b-5p	SLC39A9	55334
hsa-miR-125b-5p	SLC46A3	283537
hsa-miR-125b-5p	SLC4A10	57282
hsa-miR-125b-5p	SLC6A15	55117
hsa-miR-125b-5p	SLITRK6	84189
hsa-miR-125b-5p	SMCR8	140775
hsa-miR-125b-5p	SMEK1	55671
hsa-miR-125b-5p	SOX30	11063
hsa-miR-125b-5p	SP5	389058
hsa-miR-125b-5p	SSTR3	6753
hsa-miR-125b-5p	STARD13	90627
hsa-miR-125b-5p	SUV39H1	6839
hsa-miR-125b-5p	SYVN1	84447
hsa-miR-125b-5p	TAP2	6891
hsa-miR-125b-5p	TGOLN2	10618
hsa-miR-125b-5p	THEMIS2	9473
hsa-miR-125b-5p	TMEM120B	144404
hsa-miR-125b-5p	TMEM135	65084
hsa-miR-125b-5p	TMEM168	64418
hsa-miR-125b-5p	TMEM177	80775
hsa-miR-125b-5p	TMLHE	55217
hsa-miR-125b-5p	TMPRSS13	84000
hsa-miR-125b-5p	TNFAIP3	7128
hsa-miR-125b-5p	TNFSF4	7292
hsa-miR-125b-5p	TOR2A	27433
hsa-miR-125b-5p	TRIM71	131405
hsa-miR-125b-5p	TRMT5	57570
hsa-miR-125b-5p	TTC19	54902
hsa-miR-125b-5p	TTC7A	57217
hsa-miR-125b-5p	TTPA	7274
hsa-miR-125b-5p	UBE2R2	54926
hsa-miR-125b-5p	UBN1	29855
hsa-miR-125b-5p	UCK2	7371
hsa-miR-125b-5p	USP2	9099
hsa-miR-125b-5p	VAX1	11023
hsa-miR-125b-5p	VPS4B	9525
hsa-miR-125b-5p	WARS	7453
hsa-miR-125b-5p	ZC3H7B	23264
hsa-miR-125b-5p	ZNF343	79175
hsa-miR-125b-5p	ZNF460	10794
hsa-miR-125b-5p	ZNF543	125919
hsa-miR-125b-5p	ZNF546	339327
hsa-miR-125b-5p	ZNF559-ZNF177	100529215
hsa-miR-125b-5p	ZNF624	57547
hsa-miR-125b-5p	ZNF652	22834
hsa-miR-125b-5p	ZNF704	619279
hsa-miR-125b-5p	ZNF75D	7626
hsa-miR-125b-5p	ZNF792	126375
hsa-miR-125b-5p	ZSCAN22	342945
hsa-miR-125b-5p	ZSCAN29	146050
hsa-miR-125b-5p	ZSWIM6	57688
hsa-miR-125b-5p	BMPR1B	658
hsa-miR-125b-5p	EIF4EBP1	1978
hsa-miR-125b-5p	HMGA2	8091
hsa-miR-125b-5p	HMGA1	3159
hsa-miR-125b-5p	GLI1	2735
hsa-miR-125b-5p	NKIRAS2	28511
hsa-miR-125b-5p	SMO	6608
hsa-miR-125b-5p	TP53	7157
hsa-miR-125b-5p	VDR	7421
hsa-miR-125b-5p	SGPL1	8879
hsa-miR-125b-5p	ERBB3	2065
hsa-miR-125b-5p	ERBB2	2064
hsa-miR-125b-5p	BMF	90427
hsa-miR-125b-5p	NTRK3	4916
hsa-miR-125b-5p	CBFB	865
hsa-miR-125b-5p	AKT1	207
hsa-miR-125b-5p	CYP24A1	1591
hsa-miR-125b-5p	RAF1	5894
hsa-miR-125b-5p	PRDM1	639
hsa-miR-125b-5p	GRIN2A	2903
hsa-miR-125b-5p	CDKN2A	1029
hsa-miR-125b-5p	TP53INP1	94241
hsa-miR-125b-5p	STAT3	6774
hsa-miR-125b-5p	E2F3	1871
hsa-miR-125b-5p	IGF2	3481
hsa-miR-125b-5p	LIN28B	389421
hsa-miR-125b-5p	BBC3	27113
hsa-miR-125b-5p	PPP1CA	5499
hsa-miR-125b-5p	PRKRA	8575
hsa-miR-125b-5p	BCL2	596
hsa-miR-125b-5p	ETS1	2113
hsa-miR-125b-5p	RPS6KA1	6195
hsa-miR-125b-5p	PIGF	5281
hsa-miR-125b-5p	BCL3	602
hsa-miR-125b-5p	TBC1D1	23216
hsa-miR-125b-5p	DGAT1	8694
hsa-miR-125b-5p	FGFR2	2263
hsa-miR-125b-5p	SMAD4	4089
hsa-miR-125b-5p	IL6R	3570
hsa-miR-125b-5p	ABTB1	80325
hsa-miR-125b-5p	HK2	3099
hsa-miR-125b-5p	MMP13	4322
hsa-miR-125b-5p	MAPK14	1432
hsa-miR-125b-5p	MUC1	4582
hsa-miR-125b-5p	NES	10763
hsa-miR-125b-5p	CEBPA	1050
hsa-miR-125b-5p	CDH5	1003
hsa-miR-125b-5p	ARID3A	1820
hsa-miR-125b-5p	BCL2L2	599
hsa-miR-125b-5p	NCOR2	9612
hsa-miR-125b-5p	EIF5A2	56648
hsa-miR-125b-5p	MXD1	4084
hsa-miR-125b-5p	PIAS3	10401
hsa-miR-125b-5p	PIK3CD	5293
hsa-miR-125b-5p	LIPA	3988
hsa-miR-125b-5p	GSS	2937
hsa-miR-125b-5p	IKZF2	22807
hsa-miR-125b-5p	IKZF3	22806
hsa-miR-125b-5p	IKZF4	64375
hsa-miR-125b-5p	ICAM2	3384
hsa-miR-125b-5p	BTG2	7832
hsa-miR-125b-5p	SET	6418
hsa-miR-125b-5p	CSNK2A1	1457
hsa-miR-125b-5p	MEGF9	1955
hsa-miR-125b-5p	MAN1B1	11253
hsa-miR-125b-5p	EPOR	2057
hsa-miR-125b-5p	AHRR	57491
hsa-miR-125b-5p	SCNN1A	6337
hsa-miR-125b-5p	VPS51	738
hsa-miR-125b-5p	SIRT7	51547
hsa-miR-125b-5p	DUSP6	1848
hsa-miR-125b-5p	TET2	54790
hsa-miR-125b-5p	SEMA4C	54910
hsa-miR-125b-5p	SPHK1	8877
hsa-miR-125b-5p	MMP2	4313
hsa-miR-125b-5p	MMP26	56547
hsa-miR-125b-5p	MAP3K11	4296
hsa-miR-125b-5p	SFRP5	6425
hsa-miR-125b-5p	LIFR	3977
hsa-miR-125b-5p	GAB2	9846
hsa-miR-125b-5p	Fas	14102
hsa-miR-125b-5p	APLN	8862
hsa-miR-125b-5p	PIK3CB	5291
hsa-miR-125b-5p	IGF1R	3480
hsa-miR-125b-5p	ALOX5	240
hsa-miR-125b-5p	CD44	960
hsa-miR-125b-5p	EGFR	1956
hsa-miR-125b-5p	TNF	7124
hsa-miR-125b-5p	PHF8	23133
hsa-miR-125b-5p	KLC2	64837
hsa-miR-125b-5p	ANGPT2	285
hsa-miR-125b-5p	APC	324
hsa-miR-125b-5p	FES	2242
hsa-miR-125b-5p	DKK3	27122
hsa-miR-125b-5p	FZD6	8323
hsa-miR-125b-5p	CDKN2D	1032
hsa-miR-125b-5p	JAK2	3717
hsa-miR-125b-5p	PTH1R	5745
hsa-miR-125b-5p	HOTTIP	100316868
hsa-miR-1260a	ABHD13	84945
hsa-miR-1260a	ABL2	27
hsa-miR-1260a	ACACB	32
hsa-miR-1260a	ACO1	48
hsa-miR-1260a	ADAMTS1	9510
hsa-miR-1260a	ADARB1	104
hsa-miR-1260a	ADCY6	112
hsa-miR-1260a	ADHFE1	137872
hsa-miR-1260a	ADIPOR2	79602
hsa-miR-1260a	AGAP2	116986
hsa-miR-1260a	AGO1	26523
hsa-miR-1260a	ALKBH4	54784
hsa-miR-1260a	AMER1	139285
hsa-miR-1260a	ANGPTL7	10218
hsa-miR-1260a	APBB2	323
hsa-miR-1260a	AQP6	363
hsa-miR-1260a	ARL3	403
hsa-miR-1260a	ATF6B	1388
hsa-miR-1260a	ATG16L1	55054
hsa-miR-1260a	ATP2B1	490
hsa-miR-1260a	AUNIP	79000
hsa-miR-1260a	BCL2L2-PABPN1	100529063
hsa-miR-1260a	BHLHB9	80823
hsa-miR-1260a	C17orf51	339263
hsa-miR-1260a	C17orf64	124773
hsa-miR-1260a	C20orf112	140688
hsa-miR-1260a	C22orf29	79680
hsa-miR-1260a	C5orf63	401207
hsa-miR-1260a	C7orf65	401335
hsa-miR-1260a	C9orf40	55071
hsa-miR-1260a	CACNB4	785
hsa-miR-1260a	CAP1	10487
hsa-miR-1260a	CC2D1B	200014
hsa-miR-1260a	CCDC40	55036
hsa-miR-1260a	CD200	4345
hsa-miR-1260a	CD86	942
hsa-miR-1260a	CD9	928
hsa-miR-1260a	CDC25A	993
hsa-miR-1260a	CDCP1	64866
hsa-miR-1260a	CFLAR	8837
hsa-miR-1260a	CHD3	1107
hsa-miR-1260a	CLEC2D	29121
hsa-miR-1260a	CLRN1	7401
hsa-miR-1260a	CMBL	134147
hsa-miR-1260a	CNKSR2	22866
hsa-miR-1260a	CREBZF	58487
hsa-miR-1260a	CSRNP2	81566
hsa-miR-1260a	CXorf23	256643
hsa-miR-1260a	CYP4X1	260293
hsa-miR-1260a	DBH	1621
hsa-miR-1260a	DBNDD2	55861
hsa-miR-1260a	DLG2	1740
hsa-miR-1260a	DNAJC3	5611
hsa-miR-1260a	DNMT3A	1788
hsa-miR-1260a	DSTYK	25778
hsa-miR-1260a	ELAVL1	1994
hsa-miR-1260a	EMX1	2016
hsa-miR-1260a	ENAH	55740
hsa-miR-1260a	EPB41L1	2036
hsa-miR-1260a	ETS1	2113
hsa-miR-1260a	FAM120C	54954
hsa-miR-1260a	FANCC	2176
hsa-miR-1260a	FLI1	2313
hsa-miR-1260a	FOXF2	2295
hsa-miR-1260a	FRAS1	80144
hsa-miR-1260a	GDF11	10220
hsa-miR-1260a	GFAP	2670
hsa-miR-1260a	GLP1R	2740
hsa-miR-1260a	GOLGA6L9	440295
hsa-miR-1260a	GPR26	2849
hsa-miR-1260a	GPR68	8111
hsa-miR-1260a	HIPK2	28996
hsa-miR-1260a	HN1L	90861
hsa-miR-1260a	HNRNPUL2	221092
hsa-miR-1260a	HOXA11	3207
hsa-miR-1260a	HOXD1	3231
hsa-miR-1260a	HPDL	84842
hsa-miR-1260a	IL11	3589
hsa-miR-1260a	ITGAV	3685
hsa-miR-1260a	KCNV1	27012
hsa-miR-1260a	KCTD7	154881
hsa-miR-1260a	KDM3B	51780
hsa-miR-1260a	KIAA1522	57648
hsa-miR-1260a	KIF1C	10749
hsa-miR-1260a	KIF3A	11127
hsa-miR-1260a	KRIT1	889
hsa-miR-1260a	LDOC1L	84247
hsa-miR-1260a	LPP	4026
hsa-miR-1260a	LRRC20	55222
hsa-miR-1260a	LYPD6	130574
hsa-miR-1260a	MAPKAPK3	7867
hsa-miR-1260a	MED13L	23389
hsa-miR-1260a	MMP16	4325
hsa-miR-1260a	MRPL19	9801
hsa-miR-1260a	MYRIP	25924
hsa-miR-1260a	N4BP3	23138
hsa-miR-1260a	NAALADL2	254827
hsa-miR-1260a	NEDD1	121441
hsa-miR-1260a	NUDT16	131870
hsa-miR-1260a	NUDT4	11163
hsa-miR-1260a	NXNL2	158046
hsa-miR-1260a	OGFOD3	79701
hsa-miR-1260a	OPA3	80207
hsa-miR-1260a	OTUD7B	56957
hsa-miR-1260a	PARM1	25849
hsa-miR-1260a	PCBP2	5094
hsa-miR-1260a	PDCD2	5134
hsa-miR-1260a	PDGFD	80310
hsa-miR-1260a	PDK4	5166
hsa-miR-1260a	PDXK	8566
hsa-miR-1260a	PEX5	5830
hsa-miR-1260a	PGM5	5239
hsa-miR-1260a	PHACTR2	9749
hsa-miR-1260a	PIGM	93183
hsa-miR-1260a	PLEKHA8	84725
hsa-miR-1260a	PLXNA4	91584
hsa-miR-1260a	POFUT1	23509
hsa-miR-1260a	POU2F1	5451
hsa-miR-1260a	PRR11	55771
hsa-miR-1260a	PRR14L	253143
hsa-miR-1260a	PRRG2	5639
hsa-miR-1260a	PTGDR	5729
hsa-miR-1260a	PTGER3	5733
hsa-miR-1260a	PVRL2	5819
hsa-miR-1260a	RAB6B	51560
hsa-miR-1260a	RAD18	56852
hsa-miR-1260a	RAP1GAP	5909
hsa-miR-1260a	RASSF8	11228
hsa-miR-1260a	RELT	84957
hsa-miR-1260a	RNF41	10193
hsa-miR-1260a	RPUSD4	84881
hsa-miR-1260a	RSU1	6251
hsa-miR-1260a	SCD	6319
hsa-miR-1260a	SCNN1A	6337
hsa-miR-1260a	SF3B3	23450
hsa-miR-1260a	SH3TC2	79628
hsa-miR-1260a	SLC22A23	63027
hsa-miR-1260a	SLCO1A2	6579
hsa-miR-1260a	SOCS7	30837
hsa-miR-1260a	SORT1	6272
hsa-miR-1260a	SP1	6667
hsa-miR-1260a	SPRY2	10253
hsa-miR-1260a	STK19	8859
hsa-miR-1260a	TAF8	129685
hsa-miR-1260a	TARDBP	23435
hsa-miR-1260a	TBC1D12	23232
hsa-miR-1260a	TEC	7006
hsa-miR-1260a	TFAP2E	339488
hsa-miR-1260a	TFCP2L1	29842
hsa-miR-1260a	TFDP2	7029
hsa-miR-1260a	TMEM178B	100507421
hsa-miR-1260a	TP53RK	112858
hsa-miR-1260a	TRABD2B	388630
hsa-miR-1260a	TRIM25	7706
hsa-miR-1260a	TTC28	23331
hsa-miR-1260a	TUBAL3	79861
hsa-miR-1260a	UBTD2	92181
hsa-miR-1260a	UBTF	7343
hsa-miR-1260a	UGGT1	56886
hsa-miR-1260a	USP31	57478
hsa-miR-1260a	USP49	25862
hsa-miR-1260a	WDR17	116966
hsa-miR-1260a	WDR82	80335
hsa-miR-1260a	WHSC1	7468
hsa-miR-1260a	XKR5	389610
hsa-miR-1260a	XKR7	343702
hsa-miR-1260a	XKRY	9082
hsa-miR-1260a	XKRY2	353515
hsa-miR-1260a	XPR1	9213
hsa-miR-1260a	ZBTB6	10773
hsa-miR-1260a	ZFYVE9	9372
hsa-miR-1260a	ZNF106	64397
hsa-miR-1260a	ZNF124	7678
hsa-miR-1260a	ZNF208	7757
hsa-miR-1260a	ZNF229	7772
hsa-miR-1260a	ZNF503	84858
hsa-miR-1260a	ZNF517	340385
hsa-miR-1260a	ZNF569	148266
hsa-miR-1260a	ZNF629	23361
hsa-miR-1260a	ZPLD1	131368
hsa-miR-1260b	ABL2	27
hsa-miR-1260b	ACACB	32
hsa-miR-1260b	ACER2	340485
hsa-miR-1260b	ACO1	48
hsa-miR-1260b	ADAMTS1	9510
hsa-miR-1260b	ADCY6	112
hsa-miR-1260b	ADIPOR2	79602
hsa-miR-1260b	APBB2	323
hsa-miR-1260b	AQP6	363
hsa-miR-1260b	ARL3	403
hsa-miR-1260b	ATP2B1	490
hsa-miR-1260b	AUNIP	79000
hsa-miR-1260b	C14orf1	11161
hsa-miR-1260b	C17orf51	339263
hsa-miR-1260b	C20orf112	140688
hsa-miR-1260b	C22orf29	79680
hsa-miR-1260b	C5orf63	401207
hsa-miR-1260b	C7orf60	154743
hsa-miR-1260b	C9orf40	55071
hsa-miR-1260b	CACNB4	785
hsa-miR-1260b	CAP1	10487
hsa-miR-1260b	CCDC113	29070
hsa-miR-1260b	CCDC47	57003
hsa-miR-1260b	CD200	4345
hsa-miR-1260b	CD86	942
hsa-miR-1260b	CD9	928
hsa-miR-1260b	CDC25A	993
hsa-miR-1260b	CDCP1	64866
hsa-miR-1260b	CFLAR	8837
hsa-miR-1260b	CHD3	1107
hsa-miR-1260b	CLRN1	7401
hsa-miR-1260b	CMBL	134147
hsa-miR-1260b	CNKSR2	22866
hsa-miR-1260b	CNPPD1	27013
hsa-miR-1260b	CREBZF	58487
hsa-miR-1260b	CSNK2B	1460
hsa-miR-1260b	CSRNP2	81566
hsa-miR-1260b	CXorf23	256643
hsa-miR-1260b	CYP4X1	260293
hsa-miR-1260b	DBNDD2	55861
hsa-miR-1260b	DHX29	54505
hsa-miR-1260b	DNAJC3	5611
hsa-miR-1260b	DNMT3A	1788
hsa-miR-1260b	DSTYK	25778
hsa-miR-1260b	ELAVL1	1994
hsa-miR-1260b	ENAH	55740
hsa-miR-1260b	EPB41L1	2036
hsa-miR-1260b	ETS1	2113
hsa-miR-1260b	FAM120C	54954
hsa-miR-1260b	FAM71F1	84691
hsa-miR-1260b	FOXF2	2295
hsa-miR-1260b	FRAT2	23401
hsa-miR-1260b	GDF11	10220
hsa-miR-1260b	GDI1	2664
hsa-miR-1260b	GFAP	2670
hsa-miR-1260b	GOLGA6L9	440295
hsa-miR-1260b	GOLGA8A	23015
hsa-miR-1260b	GOLGA8B	440270
hsa-miR-1260b	GPR26	2849
hsa-miR-1260b	GPR68	8111
hsa-miR-1260b	HEMGN	55363
hsa-miR-1260b	HIPK2	28996
hsa-miR-1260b	HMGXB4	10042
hsa-miR-1260b	HN1L	90861
hsa-miR-1260b	HNRNPUL2	221092
hsa-miR-1260b	HPDL	84842
hsa-miR-1260b	HTRA2	27429
hsa-miR-1260b	IL11	3589
hsa-miR-1260b	ITGAV	3685
hsa-miR-1260b	IYD	389434
hsa-miR-1260b	KCTD7	154881
hsa-miR-1260b	KDM3B	51780
hsa-miR-1260b	KIAA1522	57648
hsa-miR-1260b	KIF1C	10749
hsa-miR-1260b	KIF21A	55605
hsa-miR-1260b	KIF3A	11127
hsa-miR-1260b	KRIT1	889
hsa-miR-1260b	LDOC1L	84247
hsa-miR-1260b	LPP	4026
hsa-miR-1260b	LRRC20	55222
hsa-miR-1260b	LYPD6	130574
hsa-miR-1260b	MAPKAPK3	7867
hsa-miR-1260b	MED13L	23389
hsa-miR-1260b	MIS18A	54069
hsa-miR-1260b	MMP16	4325
hsa-miR-1260b	N4BP3	23138
hsa-miR-1260b	NEDD1	121441
hsa-miR-1260b	NUDT4	11163
hsa-miR-1260b	NXNL2	158046
hsa-miR-1260b	OGFOD3	79701
hsa-miR-1260b	OPA3	80207
hsa-miR-1260b	OTUD7B	56957
hsa-miR-1260b	PARM1	25849
hsa-miR-1260b	PCBP2	5094
hsa-miR-1260b	PDCD2	5134
hsa-miR-1260b	PDGFD	80310
hsa-miR-1260b	PDK4	5166
hsa-miR-1260b	PDXK	8566
hsa-miR-1260b	PEX5	5830
hsa-miR-1260b	PGM5	5239
hsa-miR-1260b	PHACTR2	9749
hsa-miR-1260b	PI4KB	5298
hsa-miR-1260b	PIGM	93183
hsa-miR-1260b	PLEKHA8	84725
hsa-miR-1260b	PLXNA4	91584
hsa-miR-1260b	POU2F1	5451
hsa-miR-1260b	PRR14L	253143
hsa-miR-1260b	PRRG2	5639
hsa-miR-1260b	PTGDR	5729
hsa-miR-1260b	PTGER3	5733
hsa-miR-1260b	PVRL2	5819
hsa-miR-1260b	RAB6B	51560
hsa-miR-1260b	RASSF8	11228
hsa-miR-1260b	RNF41	10193
hsa-miR-1260b	RPUSD4	84881
hsa-miR-1260b	RSU1	6251
hsa-miR-1260b	SCD	6319
hsa-miR-1260b	SCNN1A	6337
hsa-miR-1260b	SF3B3	23450
hsa-miR-1260b	SH3TC2	79628
hsa-miR-1260b	SLC37A3	84255
hsa-miR-1260b	SLCO1A2	6579
hsa-miR-1260b	SOCS7	30837
hsa-miR-1260b	SORT1	6272
hsa-miR-1260b	SP1	6667
hsa-miR-1260b	SPRY2	10253
hsa-miR-1260b	STK19	8859
hsa-miR-1260b	TAF8	129685
hsa-miR-1260b	TEC	7006
hsa-miR-1260b	TFAP2E	339488
hsa-miR-1260b	TFCP2L1	29842
hsa-miR-1260b	TFDP2	7029
hsa-miR-1260b	TMEM178B	100507421
hsa-miR-1260b	TP53RK	112858
hsa-miR-1260b	TRABD2B	388630
hsa-miR-1260b	TRIM25	7706
hsa-miR-1260b	TTC28	23331
hsa-miR-1260b	TUBAL3	79861
hsa-miR-1260b	UBQLN2	29978
hsa-miR-1260b	UBTF	7343
hsa-miR-1260b	UGGT1	56886
hsa-miR-1260b	USP31	57478
hsa-miR-1260b	USP49	25862
hsa-miR-1260b	VSIG4	11326
hsa-miR-1260b	WDR17	116966
hsa-miR-1260b	WDR82	80335
hsa-miR-1260b	WHSC1	7468
hsa-miR-1260b	XPO7	23039
hsa-miR-1260b	XPR1	9213
hsa-miR-1260b	ZFYVE9	9372
hsa-miR-1260b	ZNF106	64397
hsa-miR-1260b	ZNF124	7678
hsa-miR-1260b	ZNF208	7757
hsa-miR-1260b	ZNF229	7772
hsa-miR-1260b	ZNF569	148266
hsa-miR-1260b	ZNF814	730051
hsa-miR-1260b	ZPLD1	131368
hsa-miR-1260b	SFRP1	6422
hsa-miR-1260b	DKK2	27123
hsa-miR-1260b	SMAD4	4089
hsa-miR-127-3p	KIF3B	9371
hsa-miR-127-3p	ATP1A2	477
hsa-miR-127-3p	SYN3	8224
hsa-miR-127-3p	VSX1	30813
hsa-miR-127-3p	BCCIP	56647
hsa-miR-127-3p	PRDM1	639
hsa-miR-127-3p	XBP1	7494
hsa-miR-127-3p	BCL6	604
hsa-miR-127-3p	KMT5A	387893
hsa-miR-127-3p	MMP13	4322
hsa-miR-127-3p	MAPK4	5596
hsa-miR-127-3p	SKI	6497
hsa-miR-127-3p	SEPT7	989
hsa-miR-127-3p	RGMA	56963
hsa-miR-127-3p	ZWINT	11130
hsa-miR-127-3p	SFRP1	6422
hsa-miR-127-3p	SERPINB9	5272
hsa-miR-127-3p	MGMT	4255
hsa-miR-127-3p	XRCC3	7517
hsa-miR-127-3p	BAG5	9529
hsa-miR-149-5p	PAQR5	54852
hsa-miR-149-5p	SLFN13	146857
hsa-miR-149-5p	SHROOM2	357
hsa-miR-149-5p	ZNF597	146434
hsa-miR-149-5p	NHP2L1	4809
hsa-miR-149-5p	FGFBP1	9982
hsa-miR-149-5p	ORAI2	80228
hsa-miR-149-5p	CD96	10225
hsa-miR-149-5p	CACNA1C	775
hsa-miR-149-5p	TUFT1	7286
hsa-miR-149-5p	MLH3	27030
hsa-miR-149-5p	UBIAD1	29914
hsa-miR-149-5p	DAP	1611
hsa-miR-149-5p	GFER	2671
hsa-miR-149-5p	SMC1A	8243
hsa-miR-149-5p	ZP4	57829
hsa-miR-149-5p	RAB43	339122
hsa-miR-149-5p	KCNJ12	3768
hsa-miR-149-5p	ADCYAP1R1	117
hsa-miR-149-5p	POLR2L	5441
hsa-miR-149-5p	KDELR2	11014
hsa-miR-149-5p	PLEKHA8	84725
hsa-miR-149-5p	CMTM3	123920
hsa-miR-149-5p	NEUROD4	58158
hsa-miR-149-5p	MAGEB4	4115
hsa-miR-149-5p	DCLK1	9201
hsa-miR-149-5p	PRR15L	79170
hsa-miR-149-5p	SP1	6667
hsa-miR-149-5p	ARHGEF18	23370
hsa-miR-149-5p	PLEKHG4B	153478
hsa-miR-149-5p	ATP2A2	488
hsa-miR-149-5p	CRTC2	200186
hsa-miR-149-5p	NTRK2	4915
hsa-miR-149-5p	BCL2L11	10018
hsa-miR-149-5p	STARD3	10948
hsa-miR-149-5p	VAV2	7410
hsa-miR-149-5p	POMT2	29954
hsa-miR-149-5p	DSC3	1825
hsa-miR-149-5p	GHR	2690
hsa-miR-149-5p	JRK	8629
hsa-miR-149-5p	SAV1	60485
hsa-miR-149-5p	RILPL1	353116
hsa-miR-149-5p	KCNS1	3787
hsa-miR-149-5p	PRKAR2A	5576
hsa-miR-149-5p	TRIOBP	11078
hsa-miR-149-5p	CCDC97	90324
hsa-miR-149-5p	IFFO2	126917
hsa-miR-149-5p	STRA6	64220
hsa-miR-149-5p	MEOX2	4223
hsa-miR-149-5p	ZMYM6	9204
hsa-miR-149-5p	DCAF10	79269
hsa-miR-149-5p	TCEB3	6924
hsa-miR-149-5p	STAC	6769
hsa-miR-149-5p	CBX5	23468
hsa-miR-149-5p	CHCHD3	54927
hsa-miR-149-5p	DNAJC18	202052
hsa-miR-149-5p	TMEM50B	757
hsa-miR-149-5p	C10orf25	220979
hsa-miR-149-5p	APOL4	80832
hsa-miR-149-5p	HDDC2	51020
hsa-miR-149-5p	GCLC	2729
hsa-miR-149-5p	UNC5C	8633
hsa-miR-149-5p	LRRC10	376132
hsa-miR-149-5p	KPNA4	3840
hsa-miR-149-5p	AP1B1	162
hsa-miR-149-5p	SFRP1	6422
hsa-miR-149-5p	GLYATL1	92292
hsa-miR-149-5p	KCNIP1	30820
hsa-miR-149-5p	SYT2	127833
hsa-miR-149-5p	SYNPO2L	79933
hsa-miR-149-5p	MTHFR	4524
hsa-miR-149-5p	XPR1	9213
hsa-miR-149-5p	ZFAND1	79752
hsa-miR-149-5p	TCTA	6988
hsa-miR-149-5p	TCF12	6938
hsa-miR-149-5p	YWHAZ	7534
hsa-miR-149-5p	FRMD4A	55691
hsa-miR-149-5p	GATC	283459
hsa-miR-149-5p	MS4A1	931
hsa-miR-149-5p	RSBN1L	222194
hsa-miR-149-5p	OAS2	4939
hsa-miR-149-5p	GRIP2	80852
hsa-miR-149-5p	ADAMTS5	11096
hsa-miR-149-5p	DNAJB12	54788
hsa-miR-149-5p	EGFR	1956
hsa-miR-149-5p	TNKS	8658
hsa-miR-149-5p	TRABD2B	388630
hsa-miR-149-5p	OAS3	4940
hsa-miR-149-5p	SHMT2	6472
hsa-miR-149-5p	MRPL3	11222
hsa-miR-149-5p	ICA1L	130026
hsa-miR-149-5p	DNAJC5	80331
hsa-miR-149-5p	NDUFC2	4718
hsa-miR-149-5p	S1PR2	9294
hsa-miR-149-5p	TGFB2	7042
hsa-miR-149-5p	TBC1D22A	25771
hsa-miR-149-5p	CNDP2	55748
hsa-miR-149-5p	C1orf204	284677
hsa-miR-149-5p	CDX2	1045
hsa-miR-149-5p	MDGA1	266727
hsa-miR-149-5p	PAK3	5063
hsa-miR-149-5p	HM13	81502
hsa-miR-149-5p	N4BP3	23138
hsa-miR-149-5p	GOLPH3L	55204
hsa-miR-149-5p	BPTF	2186
hsa-miR-149-5p	HNRNPA1	3178
hsa-miR-149-5p	SLC4A4	8671
hsa-miR-149-5p	ZNF662	389114
hsa-miR-149-5p	PAX7	5081
hsa-miR-149-5p	AAK1	22848
hsa-miR-149-5p	NUDT16	131870
hsa-miR-149-5p	CYB5B	80777
hsa-miR-149-5p	SLC25A27	9481
hsa-miR-149-5p	TMEM180	79847
hsa-miR-149-5p	TGM4	7047
hsa-miR-149-5p	NSL1	25936
hsa-miR-149-5p	MAGEB18	286514
hsa-miR-149-5p	CLN5	1203
hsa-miR-149-5p	C11orf31	280636
hsa-miR-149-5p	GUCD1	83606
hsa-miR-149-5p	PSD3	23362
hsa-miR-149-5p	PI4K2A	55361
hsa-miR-149-5p	NDST1	3340
hsa-miR-149-5p	C1orf226	400793
hsa-miR-149-5p	PODXL	5420
hsa-miR-149-5p	ATP6V1C1	528
hsa-miR-149-5p	BAHD1	22893
hsa-miR-149-5p	DRC1	92749
hsa-miR-149-5p	ZDHHC3	51304
hsa-miR-149-5p	RBFA	79863
hsa-miR-149-5p	UPK1B	7348
hsa-miR-149-5p	ALG1	56052
hsa-miR-149-5p	COX10	1352
hsa-miR-149-5p	KSR2	283455
hsa-miR-149-5p	DCUN1D5	84259
hsa-miR-149-5p	STRADB	55437
hsa-miR-149-5p	IL6	3569
hsa-miR-149-5p	RHOXF2B	727940
hsa-miR-149-5p	RAB3B	5865
hsa-miR-149-5p	PLA2R1	22925
hsa-miR-149-5p	EGLN3	112399
hsa-miR-149-5p	TMEM86A	144110
hsa-miR-149-5p	SLC35B4	84912
hsa-miR-149-5p	NEO1	4756
hsa-miR-149-5p	FZD5	7855
hsa-miR-149-5p	HINFP	25988
hsa-miR-149-5p	ELP5	23587
hsa-miR-149-5p	TMEM234	56063
hsa-miR-149-5p	MEGF6	1953
hsa-miR-149-5p	HOOK3	84376
hsa-miR-149-5p	UBFD1	56061
hsa-miR-149-5p	KIF2A	3796
hsa-miR-149-5p	HIP1R	9026
hsa-miR-149-5p	ZNF664-FAM101A	100533183
hsa-miR-149-5p	RNF2	6045
hsa-miR-149-5p	SLC6A6	6533
hsa-miR-149-5p	PHLPP2	23035
hsa-miR-149-5p	SLC22A9	114571
hsa-miR-149-5p	CSNK1G1	53944
hsa-miR-149-5p	FAM101A	144347
hsa-miR-149-5p	ABCA1	19
hsa-miR-149-5p	SLC35E2	9906
hsa-miR-149-5p	MAP3K13	9175
hsa-miR-149-5p	UPF2	26019
hsa-miR-149-5p	TMEM245	23731
hsa-miR-149-5p	PCDH19	57526
hsa-miR-149-5p	EPHB3	2049
hsa-miR-149-5p	MURC	347273
hsa-miR-149-5p	YKT6	10652
hsa-miR-149-5p	RHOXF2	84528
hsa-miR-149-5p	PCDH15	65217
hsa-miR-149-5p	ISY1-RAB43	100534599
hsa-miR-149-5p	SLCO1A2	6579
hsa-miR-149-5p	IQSEC2	23096
hsa-miR-149-5p	ANKRD22	118932
hsa-miR-149-5p	PLEKHA5	54477
hsa-miR-149-5p	HNRNPA1L2	144983
hsa-miR-149-5p	ADCY1	107
hsa-miR-149-5p	SGK494	124923
hsa-miR-149-5p	RABGAP1L	9910
hsa-miR-149-5p	ELOVL7	79993
hsa-miR-149-5p	REPS2	9185
hsa-miR-149-5p	TMF1	7110
hsa-miR-149-5p	MTG2	26164
hsa-miR-149-5p	CEACAM3	1084
hsa-miR-149-5p	FCGR3B	2215
hsa-miR-149-5p	ZNF33A	7581
hsa-miR-149-5p	FLT1	2321
hsa-miR-149-5p	SPINK7	84651
hsa-miR-149-5p	ZBTB2	57621
hsa-miR-149-5p	CAPN15	6650
hsa-miR-149-5p	CPXM2	119587
hsa-miR-149-5p	GDAP2	54834
hsa-miR-149-5p	FBXW2	26190
hsa-miR-149-5p	SUSD5	26032
hsa-miR-149-5p	DGKB	1607
hsa-miR-149-5p	SLC7A14	57709
hsa-miR-149-5p	CCNI	10983
hsa-miR-149-5p	CREB3L3	84699
hsa-miR-149-5p	CACHD1	57685
hsa-miR-149-5p	RNASE11	122651
hsa-miR-149-5p	FOXM1	2305
hsa-miR-149-5p	GIT1	28964
hsa-miR-149-5p	FGFR1	2260
hsa-miR-149-5p	GPC1	2817
hsa-miR-149-5p	MYD88	4615
hsa-miR-149-5p	PTGER2	5732
hsa-miR-149-5p	BBC3	27113
hsa-miR-149-5p	FGF21	26291
hsa-miR-149-5p	FASLG	356
hsa-miR-149-5p	PPM1F	9647
hsa-miR-151a-5p	UBN1	29855
hsa-miR-151a-5p	LOC100129098	100129098
hsa-miR-151a-5p	NDE1	54820
hsa-miR-151a-5p	RALGAPA1	253959
hsa-miR-151a-5p	SLC25A24	29957
hsa-miR-151a-5p	NTRK2	4915
hsa-miR-151a-5p	ERAP1	51752
hsa-miR-151a-5p	PCSK6	5046
hsa-miR-151a-5p	SCN4A	6329
hsa-miR-151a-5p	SOX17	64321
hsa-miR-151a-5p	UTY	7404
hsa-miR-151a-5p	SLC44A5	204962
hsa-miR-151a-5p	IQGAP1	8826
hsa-miR-151a-5p	SH2D4B	387694
hsa-miR-151a-5p	FANCA	2175
hsa-miR-151a-5p	TRIM58	25893
hsa-miR-151a-5p	BSN	8927
hsa-miR-151a-5p	ARHGDIA	396
hsa-miR-151a-5p	MPL	4352
hsa-miR-151a-5p	N4BP1	9683
hsa-miR-151a-5p	E2F6	1876
hsa-miR-151a-5p	CASZ1	54897
hsa-miR-151a-5p	IL1RAPL1	11141
hsa-miR-151a-5p	SMARCA5	8467
hsa-miR-151a-5p	TP53	7157
hsa-miR-151a-5p	CYTB	4519
hsa-miR-15b-3p	ABI1	10006
hsa-miR-15b-3p	ADAMDEC1	27299
hsa-miR-15b-3p	ADAMTS19	171019
hsa-miR-15b-3p	ADAMTS9	56999
hsa-miR-15b-3p	ADRB1	153
hsa-miR-15b-3p	AKT3	10000
hsa-miR-15b-3p	ALG10B	144245
hsa-miR-15b-3p	AMD1	262
hsa-miR-15b-3p	ANKFY1	51479
hsa-miR-15b-3p	AP5M1	55745
hsa-miR-15b-3p	ASCC3	10973
hsa-miR-15b-3p	ATMIN	23300
hsa-miR-15b-3p	BMI1	648
hsa-miR-15b-3p	C16orf52	730094
hsa-miR-15b-3p	C1orf21	81563
hsa-miR-15b-3p	C5orf30	90355
hsa-miR-15b-3p	CALD1	800
hsa-miR-15b-3p	CAMSAP1	157922
hsa-miR-15b-3p	CASK	8573
hsa-miR-15b-3p	CCNC	892
hsa-miR-15b-3p	CCSER1	401145
hsa-miR-15b-3p	CHM	1121
hsa-miR-15b-3p	CHMP5	51510
hsa-miR-15b-3p	CLDN12	9069
hsa-miR-15b-3p	CLIC4	25932
hsa-miR-15b-3p	CLOCK	9575
hsa-miR-15b-3p	CNPY1	285888
hsa-miR-15b-3p	COL4A3BP	10087
hsa-miR-15b-3p	COL4A4	1286
hsa-miR-15b-3p	COMMD10	51397
hsa-miR-15b-3p	COMMD3-BMI1	100532731
hsa-miR-15b-3p	COPS8	10920
hsa-miR-15b-3p	CP	1356
hsa-miR-15b-3p	CSRNP3	80034
hsa-miR-15b-3p	CXCL12	6387
hsa-miR-15b-3p	DCTN4	51164
hsa-miR-15b-3p	DDHD2	23259
hsa-miR-15b-3p	DDX3Y	8653
hsa-miR-15b-3p	DNAJC15	29103
hsa-miR-15b-3p	DYNLT1	6993
hsa-miR-15b-3p	FAM122B	159090
hsa-miR-15b-3p	FKBP7	51661
hsa-miR-15b-3p	GABRB2	2561
hsa-miR-15b-3p	GALNT7	51809
hsa-miR-15b-3p	GAP43	2596
hsa-miR-15b-3p	GIN1	54826
hsa-miR-15b-3p	GLRX5	51218
hsa-miR-15b-3p	HIF1A	3091
hsa-miR-15b-3p	HS2ST1	9653
hsa-miR-15b-3p	HUWE1	10075
hsa-miR-15b-3p	IMPAD1	54928
hsa-miR-15b-3p	ITGB8	3696
hsa-miR-15b-3p	KIAA1598	57698
hsa-miR-15b-3p	KITLG	4254
hsa-miR-15b-3p	KLF13	51621
hsa-miR-15b-3p	LEPROT	54741
hsa-miR-15b-3p	LIN7C	55327
hsa-miR-15b-3p	LOC100507462	100507462
hsa-miR-15b-3p	LPGAT1	9926
hsa-miR-15b-3p	LRCH1	23143
hsa-miR-15b-3p	LZTFL1	54585
hsa-miR-15b-3p	MCL1	4170
hsa-miR-15b-3p	MCTS1	28985
hsa-miR-15b-3p	ME1	4199
hsa-miR-15b-3p	MGA	23269
hsa-miR-15b-3p	MNT	4335
hsa-miR-15b-3p	MPL	4352
hsa-miR-15b-3p	MXD1	4084
hsa-miR-15b-3p	MYO5A	4644
hsa-miR-15b-3p	NAA38	51691
hsa-miR-15b-3p	NAV2	89797
hsa-miR-15b-3p	NCMAP	400746
hsa-miR-15b-3p	NDFIP2	54602
hsa-miR-15b-3p	NEK7	140609
hsa-miR-15b-3p	NFE2L1	4779
hsa-miR-15b-3p	NPY2R	4887
hsa-miR-15b-3p	NUPL1	9818
hsa-miR-15b-3p	OAZ1	4946
hsa-miR-15b-3p	OGN	4969
hsa-miR-15b-3p	OSBPL11	114885
hsa-miR-15b-3p	OXR1	55074
hsa-miR-15b-3p	PANK1	53354
hsa-miR-15b-3p	PCDHGA11	56105
hsa-miR-15b-3p	PCNX	22990
hsa-miR-15b-3p	PDZK1	5174
hsa-miR-15b-3p	PGAP1	80055
hsa-miR-15b-3p	PHF14	9678
hsa-miR-15b-3p	PI15	51050
hsa-miR-15b-3p	PKIA	5569
hsa-miR-15b-3p	PKN2	5586
hsa-miR-15b-3p	PLSCR1	5359
hsa-miR-15b-3p	POU2F1	5451
hsa-miR-15b-3p	PPP1CB	5500
hsa-miR-15b-3p	PPP1R2	5504
hsa-miR-15b-3p	PRB1	5542
hsa-miR-15b-3p	PRB3	5544
hsa-miR-15b-3p	PRH2	5555
hsa-miR-15b-3p	PRKD1	5587
hsa-miR-15b-3p	PROSC	11212
hsa-miR-15b-3p	PRRC1	133619
hsa-miR-15b-3p	PRRC2C	23215
hsa-miR-15b-3p	PTPRJ	5795
hsa-miR-15b-3p	RAD21	5885
hsa-miR-15b-3p	RFX3	5991
hsa-miR-15b-3p	RRM2B	50484
hsa-miR-15b-3p	SCN9A	6335
hsa-miR-15b-3p	SEC14L1	6397
hsa-miR-15b-3p	SEC24C	9632
hsa-miR-15b-3p	SEL1L	6400
hsa-miR-15b-3p	SEMA5A	9037
hsa-miR-15b-3p	SERPINA1	5265
hsa-miR-15b-3p	SH3KBP1	30011
hsa-miR-15b-3p	SLC17A4	10050
hsa-miR-15b-3p	SLC1A1	6505
hsa-miR-15b-3p	SLC31A2	1318
hsa-miR-15b-3p	SLC4A7	9497
hsa-miR-15b-3p	SMARCA5	8467
hsa-miR-15b-3p	SNCG	6623
hsa-miR-15b-3p	SOX9	6662
hsa-miR-15b-3p	SPRR1B	6699
hsa-miR-15b-3p	ST6GALNAC3	256435
hsa-miR-15b-3p	ST8SIA3	51046
hsa-miR-15b-3p	STK17B	9262
hsa-miR-15b-3p	STYX	6815
hsa-miR-15b-3p	TAOK1	57551
hsa-miR-15b-3p	TBCE	6905
hsa-miR-15b-3p	TCF7L1	83439
hsa-miR-15b-3p	TCF7L2	6934
hsa-miR-15b-3p	TMED5	50999
hsa-miR-15b-3p	TMEM47	83604
hsa-miR-15b-3p	TMPRSS2	7113
hsa-miR-15b-3p	TRAM1	23471
hsa-miR-15b-3p	TRDMT1	1787
hsa-miR-15b-3p	TRIM33	51592
hsa-miR-15b-3p	TRMT61B	55006
hsa-miR-15b-3p	TUBB6	84617
hsa-miR-15b-3p	TYW5	129450
hsa-miR-15b-3p	UBE2QL1	134111
hsa-miR-15b-3p	UBN2	254048
hsa-miR-15b-3p	UBR3	130507
hsa-miR-15b-3p	UGT2B10	7365
hsa-miR-15b-3p	USP14	9097
hsa-miR-15b-3p	ZMYM1	79830
hsa-miR-15b-3p	ZNF138	7697
hsa-miR-15b-3p	ZNF800	168850
hsa-miR-15b-3p	IGF1R	3480
hsa-miR-15b-3p	RECK	8434
hsa-miR-15b-3p	SIRT4	23409
hsa-miR-15b-3p	TRIM31	11074
hsa-miR-15b-3p	CCND3	896
hsa-miR-15b-5p	ABCC5	10057
hsa-miR-15b-5p	ABHD2	11057
hsa-miR-15b-5p	ACOX1	51
hsa-miR-15b-5p	ACSBG1	23205
hsa-miR-15b-5p	ACTR2	10097
hsa-miR-15b-5p	ACVR2A	92
hsa-miR-15b-5p	ADAMTS3	9508
hsa-miR-15b-5p	ADAMTS5	11096
hsa-miR-15b-5p	ADCY5	111
hsa-miR-15b-5p	AGK	55750
hsa-miR-15b-5p	AGO4	192670
hsa-miR-15b-5p	AGPAT3	56894
hsa-miR-15b-5p	AGPAT6	137964
hsa-miR-15b-5p	AHCYL2	23382
hsa-miR-15b-5p	AKAP12	9590
hsa-miR-15b-5p	AKT3	10000
hsa-miR-15b-5p	ANKIB1	54467
hsa-miR-15b-5p	ANKRD34C	390616
hsa-miR-15b-5p	ANKRD46	157567
hsa-miR-15b-5p	AQP11	282679
hsa-miR-15b-5p	AREL1	9870
hsa-miR-15b-5p	ARHGAP20	57569
hsa-miR-15b-5p	ARHGAP32	9743
hsa-miR-15b-5p	ARHGAP5	394
hsa-miR-15b-5p	ARL2	402
hsa-miR-15b-5p	ARL3	403
hsa-miR-15b-5p	ASB1	51665
hsa-miR-15b-5p	ASH1L	55870
hsa-miR-15b-5p	ATF6	22926
hsa-miR-15b-5p	ATG14	22863
hsa-miR-15b-5p	ATP5G3	518
hsa-miR-15b-5p	ATP7A	538
hsa-miR-15b-5p	ATXN2	6311
hsa-miR-15b-5p	ATXN7L1	222255
hsa-miR-15b-5p	ATXN7L2	127002
hsa-miR-15b-5p	B4GALT1	2683
hsa-miR-15b-5p	BCAP29	55973
hsa-miR-15b-5p	BCAS1	8537
hsa-miR-15b-5p	BCL2L2	599
hsa-miR-15b-5p	BDNF	627
hsa-miR-15b-5p	BTBD9	114781
hsa-miR-15b-5p	BTG2	7832
hsa-miR-15b-5p	BTLA	151888
hsa-miR-15b-5p	BTRC	8945
hsa-miR-15b-5p	C12orf76	400073
hsa-miR-15b-5p	C14orf37	145407
hsa-miR-15b-5p	C1orf21	81563
hsa-miR-15b-5p	C5orf63	401207
hsa-miR-15b-5p	C8orf86	389649
hsa-miR-15b-5p	CA2	760
hsa-miR-15b-5p	CACNA1E	777
hsa-miR-15b-5p	CACUL1	143384
hsa-miR-15b-5p	CAPRIN1	4076
hsa-miR-15b-5p	CAPZA2	830
hsa-miR-15b-5p	CASK	8573
hsa-miR-15b-5p	CASR	846
hsa-miR-15b-5p	CBX2	84733
hsa-miR-15b-5p	CBX4	8535
hsa-miR-15b-5p	CC2D1B	200014
hsa-miR-15b-5p	CCDC19	25790
hsa-miR-15b-5p	CCDC28A	25901
hsa-miR-15b-5p	CCDC6	8030
hsa-miR-15b-5p	CCND3	896
hsa-miR-15b-5p	CCNE1	898
hsa-miR-15b-5p	CD28	940
hsa-miR-15b-5p	CD2AP	23607
hsa-miR-15b-5p	CD84	8832
hsa-miR-15b-5p	CDC14A	8556
hsa-miR-15b-5p	CDC14B	8555
hsa-miR-15b-5p	CDC25A	993
hsa-miR-15b-5p	CDC27	996
hsa-miR-15b-5p	CDC37L1	55664
hsa-miR-15b-5p	CDC42SE2	56990
hsa-miR-15b-5p	CDCA4	55038
hsa-miR-15b-5p	CDHR1	92211
hsa-miR-15b-5p	CDK17	5128
hsa-miR-15b-5p	CEACAM6	4680
hsa-miR-15b-5p	CELF3	11189
hsa-miR-15b-5p	CHD2	1106
hsa-miR-15b-5p	CHEK1	1111
hsa-miR-15b-5p	CLCN4	1183
hsa-miR-15b-5p	CLCN5	1184
hsa-miR-15b-5p	CLDN12	9069
hsa-miR-15b-5p	CLOCK	9575
hsa-miR-15b-5p	CLSPN	63967
hsa-miR-15b-5p	CMTM4	146223
hsa-miR-15b-5p	CNNM2	54805
hsa-miR-15b-5p	CNOT6L	246175
hsa-miR-15b-5p	CNTN3	5067
hsa-miR-15b-5p	CNTNAP1	8506
hsa-miR-15b-5p	COL4A3BP	10087
hsa-miR-15b-5p	CPEB2	132864
hsa-miR-15b-5p	CPEB3	22849
hsa-miR-15b-5p	CPSF6	11052
hsa-miR-15b-5p	CUL2	8453
hsa-miR-15b-5p	CUL3	8452
hsa-miR-15b-5p	CWC15	51503
hsa-miR-15b-5p	CXorf40A	91966
hsa-miR-15b-5p	CXorf40B	541578
hsa-miR-15b-5p	CYB561A3	220002
hsa-miR-15b-5p	CYB561D1	284613
hsa-miR-15b-5p	CYLD	1540
hsa-miR-15b-5p	CYP26B1	56603
hsa-miR-15b-5p	CYP2S1	29785
hsa-miR-15b-5p	DCAF8	50717
hsa-miR-15b-5p	DCLK1	9201
hsa-miR-15b-5p	DCUN1D5	84259
hsa-miR-15b-5p	DDX3X	1654
hsa-miR-15b-5p	DEF8	54849
hsa-miR-15b-5p	DENND6A	201627
hsa-miR-15b-5p	DEPDC5	9681
hsa-miR-15b-5p	DESI1	27351
hsa-miR-15b-5p	DIEXF	27042
hsa-miR-15b-5p	DIXDC1	85458
hsa-miR-15b-5p	DMTF1	9988
hsa-miR-15b-5p	DNAJB4	11080
hsa-miR-15b-5p	DPH5	51611
hsa-miR-15b-5p	DPY19L4	286148
hsa-miR-15b-5p	DVL1	1855
hsa-miR-15b-5p	DYNC1I1	1780
hsa-miR-15b-5p	DYNC1LI2	1783
hsa-miR-15b-5p	EFCAB5	374786
hsa-miR-15b-5p	ELAC1	55520
hsa-miR-15b-5p	ELK4	2005
hsa-miR-15b-5p	ENAH	55740
hsa-miR-15b-5p	ENTPD1	953
hsa-miR-15b-5p	ERCC6	2074
hsa-miR-15b-5p	ESRRG	2104
hsa-miR-15b-5p	ETNK1	55500
hsa-miR-15b-5p	EXT2	2132
hsa-miR-15b-5p	EYA1	2138
hsa-miR-15b-5p	EZH1	2145
hsa-miR-15b-5p	FAM110C	642273
hsa-miR-15b-5p	FAM134A	79137
hsa-miR-15b-5p	FAM134C	162427
hsa-miR-15b-5p	FAM63B	54629
hsa-miR-15b-5p	FAM81A	145773
hsa-miR-15b-5p	FASN	2194
hsa-miR-15b-5p	FBLN1	2192
hsa-miR-15b-5p	FBXL20	84961
hsa-miR-15b-5p	FBXW7	55294
hsa-miR-15b-5p	FCRL2	79368
hsa-miR-15b-5p	FECH	2235
hsa-miR-15b-5p	FGF2	2247
hsa-miR-15b-5p	FNDC3B	64778
hsa-miR-15b-5p	FOXK1	221937
hsa-miR-15b-5p	FSTL4	23105
hsa-miR-15b-5p	FUBP1	8880
hsa-miR-15b-5p	GAREM	64762
hsa-miR-15b-5p	GFAP	2670
hsa-miR-15b-5p	GGA3	23163
hsa-miR-15b-5p	GHR	2690
hsa-miR-15b-5p	GLT1D1	144423
hsa-miR-15b-5p	GNA12	2768
hsa-miR-15b-5p	GNAT1	2779
hsa-miR-15b-5p	GPR63	81491
hsa-miR-15b-5p	GSG1	83445
hsa-miR-15b-5p	GSKIP	51527
hsa-miR-15b-5p	HAUS3	79441
hsa-miR-15b-5p	HELZ	9931
hsa-miR-15b-5p	HEPHL1	341208
hsa-miR-15b-5p	HIPK2	28996
hsa-miR-15b-5p	HOXA10	3206
hsa-miR-15b-5p	HSPE1-MOB4	100529241
hsa-miR-15b-5p	HTR2A	3356
hsa-miR-15b-5p	HTR4	3360
hsa-miR-15b-5p	IHH	3549
hsa-miR-15b-5p	IKBKB	3551
hsa-miR-15b-5p	INSR	3643
hsa-miR-15b-5p	IPO7	10527
hsa-miR-15b-5p	IPPK	64768
hsa-miR-15b-5p	IRAK2	3656
hsa-miR-15b-5p	IST1	9798
hsa-miR-15b-5p	JRK	8629
hsa-miR-15b-5p	KATNAL1	84056
hsa-miR-15b-5p	KBTBD2	25948
hsa-miR-15b-5p	KCNJ2	3759
hsa-miR-15b-5p	KCNK10	54207
hsa-miR-15b-5p	KCNN4	3783
hsa-miR-15b-5p	KDSR	2531
hsa-miR-15b-5p	KIAA0247	9766
hsa-miR-15b-5p	KIAA1432	57589
hsa-miR-15b-5p	KIAA1804	84451
hsa-miR-15b-5p	KIF1B	23095
hsa-miR-15b-5p	KIF21A	55605
hsa-miR-15b-5p	KIF23	9493
hsa-miR-15b-5p	KIF5A	3798
hsa-miR-15b-5p	KIF5C	3800
hsa-miR-15b-5p	KLHDC8B	200942
hsa-miR-15b-5p	LAMP3	27074
hsa-miR-15b-5p	LHX3	8022
hsa-miR-15b-5p	LOC100130451	100130451
hsa-miR-15b-5p	LRCH1	23143
hsa-miR-15b-5p	LRP6	4040
hsa-miR-15b-5p	LSM11	134353
hsa-miR-15b-5p	LUZP1	7798
hsa-miR-15b-5p	LY9	4063
hsa-miR-15b-5p	LYPLAL1	127018
hsa-miR-15b-5p	LYRM5	144363
hsa-miR-15b-5p	MACC1	346389
hsa-miR-15b-5p	MAP2K1	5604
hsa-miR-15b-5p	MASP1	5648
hsa-miR-15b-5p	MAVS	57506
hsa-miR-15b-5p	MBNL2	10150
hsa-miR-15b-5p	MED26	9441
hsa-miR-15b-5p	MEOX2	4223
hsa-miR-15b-5p	MFN2	9927
hsa-miR-15b-5p	MGAT4A	11320
hsa-miR-15b-5p	MKNK1	8569
hsa-miR-15b-5p	MOB4	25843
hsa-miR-15b-5p	MOCS1	4337
hsa-miR-15b-5p	MPDZ	8777
hsa-miR-15b-5p	MRPS2	51116
hsa-miR-15b-5p	MTHFR	4524
hsa-miR-15b-5p	MTMR3	8897
hsa-miR-15b-5p	MYB	4602
hsa-miR-15b-5p	MYLK	4638
hsa-miR-15b-5p	MYO5A	4644
hsa-miR-15b-5p	MYO5B	4645
hsa-miR-15b-5p	N4BP1	9683
hsa-miR-15b-5p	NAPG	8774
hsa-miR-15b-5p	NAT8L	339983
hsa-miR-15b-5p	NDNL2	56160
hsa-miR-15b-5p	NEBL	10529
hsa-miR-15b-5p	NEDD9	4739
hsa-miR-15b-5p	NFATC3	4775
hsa-miR-15b-5p	NFS1	9054
hsa-miR-15b-5p	NHLRC2	374354
hsa-miR-15b-5p	NLRX1	79671
hsa-miR-15b-5p	NOS1	4842
hsa-miR-15b-5p	NSG1	27065
hsa-miR-15b-5p	NSMF	26012
hsa-miR-15b-5p	NUP50	10762
hsa-miR-15b-5p	NXPE3	91775
hsa-miR-15b-5p	ODF2L	57489
hsa-miR-15b-5p	OOEP	441161
hsa-miR-15b-5p	ORC4	5000
hsa-miR-15b-5p	PAFAH1B1	5048
hsa-miR-15b-5p	PAFAH1B2	5049
hsa-miR-15b-5p	PAGR1	79447
hsa-miR-15b-5p	PAPPA	5069
hsa-miR-15b-5p	PBX3	5090
hsa-miR-15b-5p	PCDH9	5101
hsa-miR-15b-5p	PCM1	5108
hsa-miR-15b-5p	PCMT1	5110
hsa-miR-15b-5p	PCSK6	5046
hsa-miR-15b-5p	PDK3	5165
hsa-miR-15b-5p	PDK4	5166
hsa-miR-15b-5p	PDLIM5	10611
hsa-miR-15b-5p	PDYN	5173
hsa-miR-15b-5p	PEX13	5194
hsa-miR-15b-5p	PHKA1	5255
hsa-miR-15b-5p	PIK3R1	5295
hsa-miR-15b-5p	PISD	23761
hsa-miR-15b-5p	PLAG1	5324
hsa-miR-15b-5p	PLD1	5337
hsa-miR-15b-5p	PLEKHA1	59338
hsa-miR-15b-5p	PLEKHA5	54477
hsa-miR-15b-5p	PLRG1	5356
hsa-miR-15b-5p	PLS1	5357
hsa-miR-15b-5p	PLSCR4	57088
hsa-miR-15b-5p	POLDIP3	84271
hsa-miR-15b-5p	POLR3F	10621
hsa-miR-15b-5p	PPAP2A	8611
hsa-miR-15b-5p	PPAPDC2	403313
hsa-miR-15b-5p	PPM1A	5494
hsa-miR-15b-5p	PPM1D	8493
hsa-miR-15b-5p	PPP1R11	6992
hsa-miR-15b-5p	PPP6C	5537
hsa-miR-15b-5p	PRDM4	11108
hsa-miR-15b-5p	PRKAR2A	5576
hsa-miR-15b-5p	PRRC2C	23215
hsa-miR-15b-5p	PRTG	283659
hsa-miR-15b-5p	PSAT1	29968
hsa-miR-15b-5p	PSMA5	5686
hsa-miR-15b-5p	PTCD3	55037
hsa-miR-15b-5p	PTH	5741
hsa-miR-15b-5p	PTHLH	5744
hsa-miR-15b-5p	PTPN3	5774
hsa-miR-15b-5p	PTPN4	5775
hsa-miR-15b-5p	PTPRD	5789
hsa-miR-15b-5p	PTPRO	5800
hsa-miR-15b-5p	PTPRR	5801
hsa-miR-15b-5p	PURA	5813
hsa-miR-15b-5p	QKI	9444
hsa-miR-15b-5p	RAB10	10890
hsa-miR-15b-5p	RAB11FIP2	22841
hsa-miR-15b-5p	RAB3B	5865
hsa-miR-15b-5p	RAB3IP	117177
hsa-miR-15b-5p	RAB9B	51209
hsa-miR-15b-5p	RACGAP1	29127
hsa-miR-15b-5p	RAD23B	5887
hsa-miR-15b-5p	RASGEF1B	153020
hsa-miR-15b-5p	RBBP6	5930
hsa-miR-15b-5p	RBM12	10137
hsa-miR-15b-5p	RBM6	10180
hsa-miR-15b-5p	RBMS1	5937
hsa-miR-15b-5p	RBMS2	5939
hsa-miR-15b-5p	RECK	8434
hsa-miR-15b-5p	RET	5979
hsa-miR-15b-5p	RFK	55312
hsa-miR-15b-5p	RNF138	51444
hsa-miR-15b-5p	RNF144B	255488
hsa-miR-15b-5p	RNF41	10193
hsa-miR-15b-5p	RORA	6095
hsa-miR-15b-5p	RPS6KA3	6197
hsa-miR-15b-5p	RPS6KA6	27330
hsa-miR-15b-5p	RREB1	6239
hsa-miR-15b-5p	RS1	6247
hsa-miR-15b-5p	RSBN1	54665
hsa-miR-15b-5p	RSPO3	84870
hsa-miR-15b-5p	RUNDC3B	154661
hsa-miR-15b-5p	RUNX1T1	862
hsa-miR-15b-5p	SALL1	6299
hsa-miR-15b-5p	SEMA3A	10371
hsa-miR-15b-5p	SEMA6D	80031
hsa-miR-15b-5p	SEPT2	4735
hsa-miR-15b-5p	SESN1	27244
hsa-miR-15b-5p	SFT2D3	84826
hsa-miR-15b-5p	SGCA	6442
hsa-miR-15b-5p	SGK1	6446
hsa-miR-15b-5p	SH3BGRL2	83699
hsa-miR-15b-5p	SH3BP2	6452
hsa-miR-15b-5p	SHOC2	8036
hsa-miR-15b-5p	SIAH1	6477
hsa-miR-15b-5p	SIPA1L2	57568
hsa-miR-15b-5p	SIRT4	23409
hsa-miR-15b-5p	SLC11A2	4891
hsa-miR-15b-5p	SLC12A2	6558
hsa-miR-15b-5p	SLC13A1	6561
hsa-miR-15b-5p	SLC13A3	64849
hsa-miR-15b-5p	SLC16A1	6566
hsa-miR-15b-5p	SLC1A2	6506
hsa-miR-15b-5p	SLC20A2	6575
hsa-miR-15b-5p	SLC25A53	401612
hsa-miR-15b-5p	SLC30A4	7782
hsa-miR-15b-5p	SLC30A8	169026
hsa-miR-15b-5p	SLC35G1	159371
hsa-miR-15b-5p	SLC36A1	206358
hsa-miR-15b-5p	SLC39A10	57181
hsa-miR-15b-5p	SLC41A2	84102
hsa-miR-15b-5p	SLC4A4	8671
hsa-miR-15b-5p	SLC9A6	10479
hsa-miR-15b-5p	SLC9A8	23315
hsa-miR-15b-5p	SLITRK1	114798
hsa-miR-15b-5p	SMAD3	4088
hsa-miR-15b-5p	SMAD7	4092
hsa-miR-15b-5p	SMARCD2	6603
hsa-miR-15b-5p	SMPD1	6609
hsa-miR-15b-5p	SMURF1	57154
hsa-miR-15b-5p	SNCG	6623
hsa-miR-15b-5p	SNRNP48	154007
hsa-miR-15b-5p	SNRPB2	6629
hsa-miR-15b-5p	SNTB2	6645
hsa-miR-15b-5p	SOCS6	9306
hsa-miR-15b-5p	SON	6651
hsa-miR-15b-5p	SOS2	6655
hsa-miR-15b-5p	SPAG7	9552
hsa-miR-15b-5p	SPRY3	10251
hsa-miR-15b-5p	SPRYD3	84926
hsa-miR-15b-5p	SRP72	6731
hsa-miR-15b-5p	SRPR	6734
hsa-miR-15b-5p	SRPRB	58477
hsa-miR-15b-5p	SSR1	6745
hsa-miR-15b-5p	ST8SIA3	51046
hsa-miR-15b-5p	STK33	65975
hsa-miR-15b-5p	STK38L	23012
hsa-miR-15b-5p	STOX2	56977
hsa-miR-15b-5p	STX17	55014
hsa-miR-15b-5p	STX1A	6804
hsa-miR-15b-5p	STXBP3	6814
hsa-miR-15b-5p	STXBP5	134957
hsa-miR-15b-5p	SWAP70	23075
hsa-miR-15b-5p	SYDE2	84144
hsa-miR-15b-5p	SYN2	6854
hsa-miR-15b-5p	SYPL1	6856
hsa-miR-15b-5p	SYS1	90196
hsa-miR-15b-5p	SYT10	341359
hsa-miR-15b-5p	TACC1	6867
hsa-miR-15b-5p	TAF5	6877
hsa-miR-15b-5p	TAF8	129685
hsa-miR-15b-5p	TARBP2	6895
hsa-miR-15b-5p	TBL1XR1	79718
hsa-miR-15b-5p	TENM2	57451
hsa-miR-15b-5p	TFCP2L1	29842
hsa-miR-15b-5p	TGFBR3	7049
hsa-miR-15b-5p	THRB	7068
hsa-miR-15b-5p	TK2	7084
hsa-miR-15b-5p	TLK1	9874
hsa-miR-15b-5p	TMC7	79905
hsa-miR-15b-5p	TMEM100	55273
hsa-miR-15b-5p	TMEM43	79188
hsa-miR-15b-5p	TMEM55A	55529
hsa-miR-15b-5p	TMEM55B	90809
hsa-miR-15b-5p	TMPRSS15	5651
hsa-miR-15b-5p	TNFSF13B	10673
hsa-miR-15b-5p	TNRC6B	23112
hsa-miR-15b-5p	TRABD2B	388630
hsa-miR-15b-5p	TREM1	54210
hsa-miR-15b-5p	TRIM35	23087
hsa-miR-15b-5p	TRIM66	9866
hsa-miR-15b-5p	TRPC1	7220
hsa-miR-15b-5p	TSC1	7248
hsa-miR-15b-5p	TSEN2	80746
hsa-miR-15b-5p	TVP23C	201158
hsa-miR-15b-5p	UBE2K	3093
hsa-miR-15b-5p	UBE2Q1	55585
hsa-miR-15b-5p	UBE2V1	7335
hsa-miR-15b-5p	UBE4B	10277
hsa-miR-15b-5p	UBL3	5412
hsa-miR-15b-5p	UBN2	254048
hsa-miR-15b-5p	UBQLNL	143630
hsa-miR-15b-5p	UBR3	130507
hsa-miR-15b-5p	UHMK1	127933
hsa-miR-15b-5p	UMOD	7369
hsa-miR-15b-5p	UNC80	285175
hsa-miR-15b-5p	USP14	9097
hsa-miR-15b-5p	USP25	29761
hsa-miR-15b-5p	VAMP1	6843
hsa-miR-15b-5p	VAPB	9217
hsa-miR-15b-5p	VAT1	10493
hsa-miR-15b-5p	VCL	7414
hsa-miR-15b-5p	WAPAL	23063
hsa-miR-15b-5p	WBP11	51729
hsa-miR-15b-5p	WEE1	7465
hsa-miR-15b-5p	WIPI2	26100
hsa-miR-15b-5p	WNK3	65267
hsa-miR-15b-5p	WNT3A	89780
hsa-miR-15b-5p	WWC1	23286
hsa-miR-15b-5p	XDH	7498
hsa-miR-15b-5p	XPO7	23039
hsa-miR-15b-5p	YAP1	10413
hsa-miR-15b-5p	YRDC	79693
hsa-miR-15b-5p	YTHDC1	91746
hsa-miR-15b-5p	YWHAH	7533
hsa-miR-15b-5p	ZBTB34	403341
hsa-miR-15b-5p	ZBTB39	9880
hsa-miR-15b-5p	ZBTB44	29068
hsa-miR-15b-5p	ZC3H12C	85463
hsa-miR-15b-5p	ZC3H13	23091
hsa-miR-15b-5p	ZDHHC21	340481
hsa-miR-15b-5p	ZDHHC22	283576
hsa-miR-15b-5p	ZDHHC23	254887
hsa-miR-15b-5p	ZFHX4	79776
hsa-miR-15b-5p	ZFP91	80829
hsa-miR-15b-5p	ZFYVE20	64145
hsa-miR-15b-5p	ZIC1	7545
hsa-miR-15b-5p	ZKSCAN8	7745
hsa-miR-15b-5p	ZMAT3	64393
hsa-miR-15b-5p	ZMYM2	7750
hsa-miR-15b-5p	ZNF362	149076
hsa-miR-15b-5p	ZNF449	203523
hsa-miR-15b-5p	ZNF548	147694
hsa-miR-15b-5p	ZNF622	90441
hsa-miR-15b-5p	ZNF654	55279
hsa-miR-15b-5p	ZNF704	619279
hsa-miR-15b-5p	ZNF705A	440077
hsa-miR-15b-5p	ZNF705D	728957
hsa-miR-15b-5p	ZNF780B	163131
hsa-miR-15b-5p	ZNF81	347344
hsa-miR-15b-5p	ZNHIT6	54680
hsa-miR-15b-5p	ZNRF3	84133
hsa-miR-15b-5p	ZSCAN31	64288
hsa-miR-15b-5p	BCL2	596
hsa-miR-15b-5p	CCND1	595
hsa-miR-15b-5p	VEGFA	7422
hsa-miR-15b-5p	EIF4A1	1973
hsa-miR-15b-5p	AXIN2	8313
hsa-miR-15b-5p	IFNG	3458
hsa-miR-15b-5p	FOXO1	2308
hsa-miR-15b-5p	FUT2	2524
hsa-miR-15b-5p	KDR	3791
hsa-miR-15b-5p	HNF1A	6927
hsa-miR-15b-5p	AGO2	27161
hsa-miR-15b-5p	TRIM29	23650
hsa-miR-15b-5p	SOCS3	9021
hsa-miR-15b-5p	TGFB1	7040
hsa-miR-15b-5p	TBR1	10716
hsa-miR-15b-5p	SMAD2	4087
hsa-miR-15b-5p	BAX	581
hsa-miR-15b-5p	RAB1A	5861
hsa-miR-15b-5p	MMP9	4318
hsa-miR-15b-5p	TRIM14	9830
hsa-miR-15b-5p	MTSS1	9788
hsa-miR-15b-5p	PEBP4	157310
hsa-miR-15b-5p	OIP5	11339
hsa-miR-16-2-3p	A1CF	29974
hsa-miR-16-2-3p	AAK1	22848
hsa-miR-16-2-3p	ABCA1	19
hsa-miR-16-2-3p	ABCE1	6059
hsa-miR-16-2-3p	ABHD3	171586
hsa-miR-16-2-3p	ACOX1	51
hsa-miR-16-2-3p	ACP1	52
hsa-miR-16-2-3p	ACSL3	2181
hsa-miR-16-2-3p	ACTN1	87
hsa-miR-16-2-3p	ACVR1C	130399
hsa-miR-16-2-3p	ACVR2A	92
hsa-miR-16-2-3p	ADCYAP1	116
hsa-miR-16-2-3p	AEBP2	121536
hsa-miR-16-2-3p	AFF2	2334
hsa-miR-16-2-3p	AFF3	3899
hsa-miR-16-2-3p	AGFG1	3267
hsa-miR-16-2-3p	AGK	55750
hsa-miR-16-2-3p	AKAP11	11215
hsa-miR-16-2-3p	AKIRIN1	79647
hsa-miR-16-2-3p	ALDH1A2	8854
hsa-miR-16-2-3p	ALG10B	144245
hsa-miR-16-2-3p	ALOX15	246
hsa-miR-16-2-3p	AMIGO2	347902
hsa-miR-16-2-3p	ANGPT1	284
hsa-miR-16-2-3p	ANKRD12	23253
hsa-miR-16-2-3p	ANKRD13C	81573
hsa-miR-16-2-3p	ANKRD26	22852
hsa-miR-16-2-3p	ANKRD44	91526
hsa-miR-16-2-3p	ANLN	54443
hsa-miR-16-2-3p	ANXA7	310
hsa-miR-16-2-3p	APBB2	323
hsa-miR-16-2-3p	AR	367
hsa-miR-16-2-3p	ARFGEF1	10565
hsa-miR-16-2-3p	ARFGEF2	10564
hsa-miR-16-2-3p	ARHGAP28	79822
hsa-miR-16-2-3p	ARHGEF6	9459
hsa-miR-16-2-3p	ARL1	400
hsa-miR-16-2-3p	ARL15	54622
hsa-miR-16-2-3p	ARRDC3	57561
hsa-miR-16-2-3p	ARSK	153642
hsa-miR-16-2-3p	ASPN	54829
hsa-miR-16-2-3p	ATAD2	29028
hsa-miR-16-2-3p	ATF3	467
hsa-miR-16-2-3p	ATG12	9140
hsa-miR-16-2-3p	ATOH8	84913
hsa-miR-16-2-3p	ATP6V1C2	245973
hsa-miR-16-2-3p	ATP7A	538
hsa-miR-16-2-3p	ATXN7	6314
hsa-miR-16-2-3p	AUH	549
hsa-miR-16-2-3p	AWAT2	158835
hsa-miR-16-2-3p	B2M	567
hsa-miR-16-2-3p	BAG4	9530
hsa-miR-16-2-3p	BAG5	9529
hsa-miR-16-2-3p	BCAT1	586
hsa-miR-16-2-3p	BCHE	590
hsa-miR-16-2-3p	BCL11B	64919
hsa-miR-16-2-3p	BCOR	54880
hsa-miR-16-2-3p	BMI1	648
hsa-miR-16-2-3p	BMP3	651
hsa-miR-16-2-3p	BTG3	10950
hsa-miR-16-2-3p	BTN3A2	11118
hsa-miR-16-2-3p	C11orf58	10944
hsa-miR-16-2-3p	C1GALT1	56913
hsa-miR-16-2-3p	C22orf29	79680
hsa-miR-16-2-3p	C5orf24	134553
hsa-miR-16-2-3p	C7orf61	402573
hsa-miR-16-2-3p	C8orf37	157657
hsa-miR-16-2-3p	CA2	760
hsa-miR-16-2-3p	CADM2	253559
hsa-miR-16-2-3p	CALD1	800
hsa-miR-16-2-3p	CAMK1D	57118
hsa-miR-16-2-3p	CAST	831
hsa-miR-16-2-3p	CAV2	858
hsa-miR-16-2-3p	CCDC126	90693
hsa-miR-16-2-3p	CCDC132	55610
hsa-miR-16-2-3p	CCDC141	285025
hsa-miR-16-2-3p	CCDC152	100129792
hsa-miR-16-2-3p	CCDC50	152137
hsa-miR-16-2-3p	CCL13	6357
hsa-miR-16-2-3p	CCL20	6364
hsa-miR-16-2-3p	CCL28	56477
hsa-miR-16-2-3p	CCSAP	126731
hsa-miR-16-2-3p	CD200	4345
hsa-miR-16-2-3p	CDC73	79577
hsa-miR-16-2-3p	CDH12	1010
hsa-miR-16-2-3p	CDH8	1006
hsa-miR-16-2-3p	CDK13	8621
hsa-miR-16-2-3p	CDK17	5128
hsa-miR-16-2-3p	CDK6	1021
hsa-miR-16-2-3p	CDKL4	344387
hsa-miR-16-2-3p	CHAC2	494143
hsa-miR-16-2-3p	CHIC1	53344
hsa-miR-16-2-3p	CHML	1122
hsa-miR-16-2-3p	CHMP4C	92421
hsa-miR-16-2-3p	CLEC12B	387837
hsa-miR-16-2-3p	CLIC4	25932
hsa-miR-16-2-3p	CLIP4	79745
hsa-miR-16-2-3p	CLTC	1213
hsa-miR-16-2-3p	CMPK1	51727
hsa-miR-16-2-3p	CNOT4	4850
hsa-miR-16-2-3p	CNR1	1268
hsa-miR-16-2-3p	CNTN4	152330
hsa-miR-16-2-3p	COL11A1	1301
hsa-miR-16-2-3p	COL3A1	1281
hsa-miR-16-2-3p	COMMD3-BMI1	100532731
hsa-miR-16-2-3p	CPEB2	132864
hsa-miR-16-2-3p	CPEB3	22849
hsa-miR-16-2-3p	CREB5	9586
hsa-miR-16-2-3p	CREBZF	58487
hsa-miR-16-2-3p	CSTF2T	23283
hsa-miR-16-2-3p	CTTNBP2	83992
hsa-miR-16-2-3p	CUL2	8453
hsa-miR-16-2-3p	CYBB	1536
hsa-miR-16-2-3p	DCUN1D5	84259
hsa-miR-16-2-3p	DENND1B	163486
hsa-miR-16-2-3p	DENND4A	10260
hsa-miR-16-2-3p	DGKB	1607
hsa-miR-16-2-3p	DICER1	23405
hsa-miR-16-2-3p	DIRAS2	54769
hsa-miR-16-2-3p	DISC1	27185
hsa-miR-16-2-3p	DLG2	1740
hsa-miR-16-2-3p	DLGAP1	9229
hsa-miR-16-2-3p	DNAH10	196385
hsa-miR-16-2-3p	DNAJB9	4189
hsa-miR-16-2-3p	DNAJC10	54431
hsa-miR-16-2-3p	DNAJC21	134218
hsa-miR-16-2-3p	DNAJC3	5611
hsa-miR-16-2-3p	DPP10	57628
hsa-miR-16-2-3p	DSC3	1825
hsa-miR-16-2-3p	DSTYK	25778
hsa-miR-16-2-3p	DTWD2	285605
hsa-miR-16-2-3p	EDA2R	60401
hsa-miR-16-2-3p	EDIL3	10085
hsa-miR-16-2-3p	EEA1	8411
hsa-miR-16-2-3p	EGR3	1960
hsa-miR-16-2-3p	EIF4E3	317649
hsa-miR-16-2-3p	EMB	133418
hsa-miR-16-2-3p	ENTPD1	953
hsa-miR-16-2-3p	ERAP1	51752
hsa-miR-16-2-3p	ERBB4	2066
hsa-miR-16-2-3p	ERO1L	30001
hsa-miR-16-2-3p	ERRFI1	54206
hsa-miR-16-2-3p	ETNK1	55500
hsa-miR-16-2-3p	EXOC8	149371
hsa-miR-16-2-3p	EYA4	2070
hsa-miR-16-2-3p	FAM115A	9747
hsa-miR-16-2-3p	FAM126B	285172
hsa-miR-16-2-3p	FAM159B	100132916
hsa-miR-16-2-3p	FAM188A	80013
hsa-miR-16-2-3p	FAM91A1	157769
hsa-miR-16-2-3p	FBXO28	23219
hsa-miR-16-2-3p	FBXO33	254170
hsa-miR-16-2-3p	FGF14	2259
hsa-miR-16-2-3p	FKTN	2218
hsa-miR-16-2-3p	FLRT3	23767
hsa-miR-16-2-3p	FMNL2	114793
hsa-miR-16-2-3p	FMNL3	91010
hsa-miR-16-2-3p	FNBP1	23048
hsa-miR-16-2-3p	FOXO3	2309
hsa-miR-16-2-3p	FPGT	8790
hsa-miR-16-2-3p	FRS2	10818
hsa-miR-16-2-3p	GAB1	2549
hsa-miR-16-2-3p	GAB3	139716
hsa-miR-16-2-3p	GABRA4	2557
hsa-miR-16-2-3p	GALNT7	51809
hsa-miR-16-2-3p	GCA	25801
hsa-miR-16-2-3p	GEN1	348654
hsa-miR-16-2-3p	GFPT1	2673
hsa-miR-16-2-3p	GIMAP6	474344
hsa-miR-16-2-3p	GIN1	54826
hsa-miR-16-2-3p	GJB2	2706
hsa-miR-16-2-3p	GK5	256356
hsa-miR-16-2-3p	GMFB	2764
hsa-miR-16-2-3p	GNB4	59345
hsa-miR-16-2-3p	GNRHR	2798
hsa-miR-16-2-3p	GOLT1B	51026
hsa-miR-16-2-3p	GORAB	92344
hsa-miR-16-2-3p	GPM6B	2824
hsa-miR-16-2-3p	GPR110	266977
hsa-miR-16-2-3p	GPR83	10888
hsa-miR-16-2-3p	GRIA2	2891
hsa-miR-16-2-3p	GRSF1	2926
hsa-miR-16-2-3p	GSE1	23199
hsa-miR-16-2-3p	GTPBP10	85865
hsa-miR-16-2-3p	GUCY1A3	2982
hsa-miR-16-2-3p	HAND2	9464
hsa-miR-16-2-3p	HDAC2	3066
hsa-miR-16-2-3p	HEATR5A	25938
hsa-miR-16-2-3p	HIRA	7290
hsa-miR-16-2-3p	HLTF	6596
hsa-miR-16-2-3p	HNRNPLL	92906
hsa-miR-16-2-3p	HS2ST1	9653
hsa-miR-16-2-3p	HSDL1	83693
hsa-miR-16-2-3p	IGF2BP2	10644
hsa-miR-16-2-3p	IGSF11	152404
hsa-miR-16-2-3p	IKZF1	10320
hsa-miR-16-2-3p	IKZF2	22807
hsa-miR-16-2-3p	IMPAD1	54928
hsa-miR-16-2-3p	INO80D	54891
hsa-miR-16-2-3p	INPP1	3628
hsa-miR-16-2-3p	INPP5A	3632
hsa-miR-16-2-3p	INSR	3643
hsa-miR-16-2-3p	INTS2	57508
hsa-miR-16-2-3p	INTU	27152
hsa-miR-16-2-3p	IQCJ-SCHIP1	100505385
hsa-miR-16-2-3p	ITGA4	3676
hsa-miR-16-2-3p	ITGB8	3696
hsa-miR-16-2-3p	IYD	389434
hsa-miR-16-2-3p	JHDM1D	80853
hsa-miR-16-2-3p	KANSL1L	151050
hsa-miR-16-2-3p	KAT6A	7994
hsa-miR-16-2-3p	KAT6B	23522
hsa-miR-16-2-3p	KCNN3	3782
hsa-miR-16-2-3p	KIAA0408	9729
hsa-miR-16-2-3p	KIAA1147	57189
hsa-miR-16-2-3p	KL	9365
hsa-miR-16-2-3p	KLF5	688
hsa-miR-16-2-3p	KPNA4	3840
hsa-miR-16-2-3p	LAMP2	3920
hsa-miR-16-2-3p	LCA5	167691
hsa-miR-16-2-3p	LIMS1	3987
hsa-miR-16-2-3p	LOC400682	400682
hsa-miR-16-2-3p	LOC729020	729020
hsa-miR-16-2-3p	LPP	4026
hsa-miR-16-2-3p	LRBA	987
hsa-miR-16-2-3p	LRPPRC	10128
hsa-miR-16-2-3p	LRRC37B	114659
hsa-miR-16-2-3p	MAGEB16	139604
hsa-miR-16-2-3p	MAP10	54627
hsa-miR-16-2-3p	MAP3K2	10746
hsa-miR-16-2-3p	MAP3K5	4217
hsa-miR-16-2-3p	MAPK9	5601
hsa-miR-16-2-3p	MARCH5	54708
hsa-miR-16-2-3p	MARK1	4139
[truncated: 3,642 more rows]

## Sheet:  Yellow
miRNA	Target Gene	EntrezID
hsa-miR-10b-3p	ACSL6	23305
hsa-miR-10b-3p	ACVR2B	93
hsa-miR-10b-3p	ADAM22	53616
hsa-miR-10b-3p	ADARB1	104
hsa-miR-10b-3p	AHNAK	79026
hsa-miR-10b-3p	AKR1D1	6718
hsa-miR-10b-3p	ANKRD12	23253
hsa-miR-10b-3p	ANKRD20A3	441425
hsa-miR-10b-3p	ARFIP1	27236
hsa-miR-10b-3p	ARIH1	25820
hsa-miR-10b-3p	ARL2BP	23568
hsa-miR-10b-3p	ATRX	546
hsa-miR-10b-3p	BACH1	571
hsa-miR-10b-3p	BAGE2	85319
hsa-miR-10b-3p	BAGE3	85318
hsa-miR-10b-3p	BCAT1	586
hsa-miR-10b-3p	BDKRB2	624
hsa-miR-10b-3p	BEST3	144453
hsa-miR-10b-3p	BRSK1	84446
hsa-miR-10b-3p	BUB1	699
hsa-miR-10b-3p	C11orf57	55216
hsa-miR-10b-3p	C11orf87	399947
hsa-miR-10b-3p	C16orf62	57020
hsa-miR-10b-3p	C1orf115	79762
hsa-miR-10b-3p	C20orf112	140688
hsa-miR-10b-3p	CAB39	51719
hsa-miR-10b-3p	CACNA1E	777
hsa-miR-10b-3p	CCDC117	150275
hsa-miR-10b-3p	CCDC68	80323
hsa-miR-10b-3p	CCNA2	890
hsa-miR-10b-3p	CCNG2	901
hsa-miR-10b-3p	CDO1	1036
hsa-miR-10b-3p	CLDN11	5010
hsa-miR-10b-3p	CLIC5	53405
hsa-miR-10b-3p	CNGA3	1261
hsa-miR-10b-3p	CNOT6	57472
hsa-miR-10b-3p	CREBRF	153222
hsa-miR-10b-3p	CRISPLD1	83690
hsa-miR-10b-3p	CS	1431
hsa-miR-10b-3p	CSRNP2	81566
hsa-miR-10b-3p	CTDSPL	10217
hsa-miR-10b-3p	DLAT	1737
hsa-miR-10b-3p	DNALI1	7802
hsa-miR-10b-3p	DNM1L	10059
hsa-miR-10b-3p	ECT2	1894
hsa-miR-10b-3p	EDEM1	9695
hsa-miR-10b-3p	EDEM3	80267
hsa-miR-10b-3p	EIF1AX	1964
hsa-miR-10b-3p	EP400	57634
hsa-miR-10b-3p	ERBB4	2066
hsa-miR-10b-3p	EXOC8	149371
hsa-miR-10b-3p	EXOG	9941
hsa-miR-10b-3p	EYA4	2070
hsa-miR-10b-3p	FAM177A1	283635
hsa-miR-10b-3p	FBXO34	55030
hsa-miR-10b-3p	FBXW11	23291
hsa-miR-10b-3p	FGF13	2258
hsa-miR-10b-3p	FKBP7	51661
hsa-miR-10b-3p	FOXO3	2309
hsa-miR-10b-3p	FZD3	7976
hsa-miR-10b-3p	FZD5	7855
hsa-miR-10b-3p	GFPT1	2673
hsa-miR-10b-3p	GLS	2744
hsa-miR-10b-3p	GLT1D1	144423
hsa-miR-10b-3p	GRSF1	2926
hsa-miR-10b-3p	GSK3B	2932
hsa-miR-10b-3p	H2AFJ	55766
hsa-miR-10b-3p	HAPLN3	145864
hsa-miR-10b-3p	HAUS3	79441
hsa-miR-10b-3p	HNF1B	6928
hsa-miR-10b-3p	HSPA12A	259217
hsa-miR-10b-3p	IKZF2	22807
hsa-miR-10b-3p	IL6ST	3572
hsa-miR-10b-3p	ING1	3621
hsa-miR-10b-3p	INO80D	54891
hsa-miR-10b-3p	INTS6	26512
hsa-miR-10b-3p	ITGAV	3685
hsa-miR-10b-3p	KCNA1	3736
hsa-miR-10b-3p	KCNIP4	80333
hsa-miR-10b-3p	KCNJ3	3760
hsa-miR-10b-3p	KCNMA1	3778
hsa-miR-10b-3p	KCNS1	3787
hsa-miR-10b-3p	KCTD12	115207
hsa-miR-10b-3p	KIAA0907	22889
hsa-miR-10b-3p	KIAA2022	340533
hsa-miR-10b-3p	KPNA3	3839
hsa-miR-10b-3p	KRR1	11103
hsa-miR-10b-3p	LPCAT2	54947
hsa-miR-10b-3p	LPPR4	9890
hsa-miR-10b-3p	LRRC66	339977
hsa-miR-10b-3p	MAPK1	5594
hsa-miR-10b-3p	MAPK1IP1L	93487
hsa-miR-10b-3p	MASP1	5648
hsa-miR-10b-3p	MBD2	8932
hsa-miR-10b-3p	MBNL3	55796
hsa-miR-10b-3p	MCTP2	55784
hsa-miR-10b-3p	MDM2	4193
hsa-miR-10b-3p	MEF2D	4209
hsa-miR-10b-3p	METTL16	79066
hsa-miR-10b-3p	METTL2B	55798
hsa-miR-10b-3p	METTL7A	25840
hsa-miR-10b-3p	MFAP5	8076
hsa-miR-10b-3p	MLLT10	8028
hsa-miR-10b-3p	MMD2	221938
hsa-miR-10b-3p	MOB1A	55233
hsa-miR-10b-3p	MPPED2	744
hsa-miR-10b-3p	MTDH	92140
hsa-miR-10b-3p	MYOZ3	91977
hsa-miR-10b-3p	NAA38	51691
hsa-miR-10b-3p	NANP	140838
hsa-miR-10b-3p	NAPG	8774
hsa-miR-10b-3p	NAV1	89796
hsa-miR-10b-3p	NBR1	4077
hsa-miR-10b-3p	NDUFS1	4719
hsa-miR-10b-3p	NECAB1	64168
hsa-miR-10b-3p	NSD1	64324
hsa-miR-10b-3p	NSL1	25936
hsa-miR-10b-3p	NUP160	23279
hsa-miR-10b-3p	OGDH	4967
hsa-miR-10b-3p	OSGIN2	734
hsa-miR-10b-3p	PAH	5053
hsa-miR-10b-3p	PAPLN	89932
hsa-miR-10b-3p	PAX6	5080
hsa-miR-10b-3p	PCDH15	65217
hsa-miR-10b-3p	PCDH17	27253
hsa-miR-10b-3p	PDPK1	5170
hsa-miR-10b-3p	PHAX	51808
hsa-miR-10b-3p	PHKB	5257
hsa-miR-10b-3p	PLEKHG2	64857
hsa-miR-10b-3p	PLK1	5347
hsa-miR-10b-3p	PLXNA2	5362
hsa-miR-10b-3p	PMF1	11243
hsa-miR-10b-3p	PNN	5411
hsa-miR-10b-3p	POLE	5426
hsa-miR-10b-3p	PPM1H	57460
hsa-miR-10b-3p	PPP2R2A	5520
hsa-miR-10b-3p	PPP3CC	5533
hsa-miR-10b-3p	PRKAA2	5563
hsa-miR-10b-3p	PTP4A2	8073
hsa-miR-10b-3p	PTPN21	11099
hsa-miR-10b-3p	PUM1	9698
hsa-miR-10b-3p	QRSL1	55278
hsa-miR-10b-3p	RAB23	51715
hsa-miR-10b-3p	RAB33B	83452
hsa-miR-10b-3p	RAB4A	5867
hsa-miR-10b-3p	RALA	5898
hsa-miR-10b-3p	RB1	5925
hsa-miR-10b-3p	RBPJ	3516
hsa-miR-10b-3p	RFX4	5992
hsa-miR-10b-3p	RGPD5	84220
hsa-miR-10b-3p	RGPD6	729540
hsa-miR-10b-3p	RGPD8	727851
hsa-miR-10b-3p	RMND5A	64795
hsa-miR-10b-3p	RNF168	165918
hsa-miR-10b-3p	RORC	6097
hsa-miR-10b-3p	RSBN1	54665
hsa-miR-10b-3p	RSPO2	340419
hsa-miR-10b-3p	RTCA	8634
hsa-miR-10b-3p	RYK	6259
hsa-miR-10b-3p	SALL1	6299
hsa-miR-10b-3p	SC5D	6309
hsa-miR-10b-3p	SCP2	6342
hsa-miR-10b-3p	SEL1L	6400
hsa-miR-10b-3p	SEMA6D	80031
hsa-miR-10b-3p	SFRP1	6422
hsa-miR-10b-3p	SGCD	6444
hsa-miR-10b-3p	SHISA9	729993
hsa-miR-10b-3p	SKP1	6500
hsa-miR-10b-3p	SLC48A1	55652
hsa-miR-10b-3p	SLIT1	6585
hsa-miR-10b-3p	SMAD5	4090
hsa-miR-10b-3p	SOD2	6648
hsa-miR-10b-3p	SPEF2	79925
hsa-miR-10b-3p	STON1	11037
hsa-miR-10b-3p	SUPT7L	9913
hsa-miR-10b-3p	SUV420H1	51111
hsa-miR-10b-3p	SYT1	6857
hsa-miR-10b-3p	TATDN3	128387
hsa-miR-10b-3p	TBC1D9	23158
hsa-miR-10b-3p	TBXA2R	6915
hsa-miR-10b-3p	TFAP2C	7022
hsa-miR-10b-3p	TIAM2	26230
hsa-miR-10b-3p	TLR10	81793
hsa-miR-10b-3p	TM9SF3	56889
hsa-miR-10b-3p	TMCC1	23023
hsa-miR-10b-3p	TMCC3	57458
hsa-miR-10b-3p	TMEM242	729515
hsa-miR-10b-3p	TMEM261	90871
hsa-miR-10b-3p	TMOD1	7111
hsa-miR-10b-3p	TMTC1	83857
hsa-miR-10b-3p	TNKS2	80351
hsa-miR-10b-3p	TNS1	7145
hsa-miR-10b-3p	TOR1AIP1	26092
hsa-miR-10b-3p	TRIB2	28951
hsa-miR-10b-3p	TRIM13	10206
hsa-miR-10b-3p	TRIM14	9830
hsa-miR-10b-3p	TRIM39	56658
hsa-miR-10b-3p	TTC33	23548
hsa-miR-10b-3p	TXLNB	167838
hsa-miR-10b-3p	UBQLN2	29978
hsa-miR-10b-3p	VPS37A	137492
hsa-miR-10b-3p	VTA1	51534
hsa-miR-10b-3p	WDR36	134430
hsa-miR-10b-3p	WNK3	65267
hsa-miR-10b-3p	WWTR1	25937
hsa-miR-10b-3p	XK	7504
hsa-miR-10b-3p	YPEL2	388403
hsa-miR-10b-3p	YWHAE	7531
hsa-miR-10b-3p	ZFP36L2	678
hsa-miR-10b-3p	ZIC2	7546
hsa-miR-10b-3p	ZNF10	7556
hsa-miR-10b-3p	ZNF140	7699
hsa-miR-10b-3p	ZNF18	7566
hsa-miR-10b-3p	ZNF248	57209
hsa-miR-10b-3p	ZNF474	133923
hsa-miR-10b-3p	ZNF721	170960
hsa-miR-10b-3p	ZSCAN21	7589
hsa-miR-10b-3p	ZUFSP	221302
hsa-miR-10b-5p	ACKR2	1238
hsa-miR-10b-5p	ACOT13	55856
hsa-miR-10b-5p	ACPP	55
hsa-miR-10b-5p	AKT1	207
hsa-miR-10b-5p	ANK1	286
hsa-miR-10b-5p	ARG2	384
hsa-miR-10b-5p	ARSJ	79642
hsa-miR-10b-5p	ARSK	153642
hsa-miR-10b-5p	ATP5F1	515
hsa-miR-10b-5p	ATP6V0D2	245972
hsa-miR-10b-5p	BCL2L11	10018
hsa-miR-10b-5p	BDNF	627
hsa-miR-10b-5p	C6orf132	647024
hsa-miR-10b-5p	CCDC88A	55704
hsa-miR-10b-5p	CCNB3	85417
hsa-miR-10b-5p	CDKN1A	1026
hsa-miR-10b-5p	CDKN2A	1029
hsa-miR-10b-5p	CEP85L	387119
hsa-miR-10b-5p	CLCC1	23155
hsa-miR-10b-5p	CLEC2B	9976
hsa-miR-10b-5p	CNST	163882
hsa-miR-10b-5p	COL4A4	1286
hsa-miR-10b-5p	CREB1	1385
hsa-miR-10b-5p	CREBL2	1389
hsa-miR-10b-5p	CRLF3	51379
hsa-miR-10b-5p	CSMD1	64478
hsa-miR-10b-5p	CSRNP3	80034
hsa-miR-10b-5p	CYP4V2	285440
hsa-miR-10b-5p	CYP7B1	9420
hsa-miR-10b-5p	DDX58	23586
hsa-miR-10b-5p	DENND6A	201627
hsa-miR-10b-5p	EBF2	64641
hsa-miR-10b-5p	EIF2AK2	5610
hsa-miR-10b-5p	ELOVL2	54898
hsa-miR-10b-5p	FBXO22	26263
hsa-miR-10b-5p	FIGN	55137
hsa-miR-10b-5p	FOXN4	121643
hsa-miR-10b-5p	GABRG1	2565
hsa-miR-10b-5p	GIMAP8	155038
hsa-miR-10b-5p	GLS	2744
hsa-miR-10b-5p	GP1BA	2811
hsa-miR-10b-5p	GTF2H1	2965
hsa-miR-10b-5p	HCN1	348980
hsa-miR-10b-5p	HOXA3	3200
hsa-miR-10b-5p	HOXB3	3213
hsa-miR-10b-5p	HOXD10	3236
hsa-miR-10b-5p	HP1BP3	50809
hsa-miR-10b-5p	HRH4	59340
hsa-miR-10b-5p	HTATIP2	10553
hsa-miR-10b-5p	IGDCC4	57722
hsa-miR-10b-5p	IRAK4	51135
hsa-miR-10b-5p	JKAMP	51528
hsa-miR-10b-5p	KCNA6	3742
hsa-miR-10b-5p	KCTD18	130535
hsa-miR-10b-5p	KL	9365
hsa-miR-10b-5p	KLF11	8462
hsa-miR-10b-5p	KLF4	9314
hsa-miR-10b-5p	LCA5	167691
hsa-miR-10b-5p	LOC400682	400682
hsa-miR-10b-5p	MAP3K7	6885
hsa-miR-10b-5p	MAPRE1	22919
hsa-miR-10b-5p	MBNL1	4154
hsa-miR-10b-5p	MBNL2	10150
hsa-miR-10b-5p	MBNL3	55796
hsa-miR-10b-5p	MDM2	4193
hsa-miR-10b-5p	MON2	23041
hsa-miR-10b-5p	MSL3	10943
hsa-miR-10b-5p	NCOR2	9612
hsa-miR-10b-5p	NDUFA4	4697
hsa-miR-10b-5p	NETO1	81832
hsa-miR-10b-5p	NF1	4763
hsa-miR-10b-5p	NOTCH1	4851
hsa-miR-10b-5p	NR2F2	7026
hsa-miR-10b-5p	PAFAH1B1	5048
hsa-miR-10b-5p	PAX6	5080
hsa-miR-10b-5p	PDCD4	27250
hsa-miR-10b-5p	PDZD8	118987
hsa-miR-10b-5p	PHF20L1	51105
hsa-miR-10b-5p	PIEZO1	9780
hsa-miR-10b-5p	PIGR	5284
hsa-miR-10b-5p	PIK3C2G	5288
hsa-miR-10b-5p	PIK3CA	5290
hsa-miR-10b-5p	PIN4	5303
hsa-miR-10b-5p	PLA1A	51365
hsa-miR-10b-5p	PPARA	5465
hsa-miR-10b-5p	PRLR	5618
hsa-miR-10b-5p	PTEN	5728
hsa-miR-10b-5p	RB1CC1	9821
hsa-miR-10b-5p	RNF112	7732
hsa-miR-10b-5p	RNF186	54546
hsa-miR-10b-5p	RNF7	9616
hsa-miR-10b-5p	RORA	6095
hsa-miR-10b-5p	RSRC1	51319
hsa-miR-10b-5p	RUFY3	22902
hsa-miR-10b-5p	SART3	9733
hsa-miR-10b-5p	SCD5	79966
hsa-miR-10b-5p	SCNN1G	6340
hsa-miR-10b-5p	SDC1	6382
hsa-miR-10b-5p	SDPR	8436
hsa-miR-10b-5p	SFMBT2	57713
hsa-miR-10b-5p	SKA1	220134
hsa-miR-10b-5p	SLC24A4	123041
hsa-miR-10b-5p	SLC5A3	6526
hsa-miR-10b-5p	SLC7A2	6542
hsa-miR-10b-5p	SNX18	112574
hsa-miR-10b-5p	SON	6651
hsa-miR-10b-5p	SPATS2L	26010
hsa-miR-10b-5p	SRSF1	6426
hsa-miR-10b-5p	TBX5	6910
hsa-miR-10b-5p	TFAP2C	7022
hsa-miR-10b-5p	TIAM1	7074
hsa-miR-10b-5p	TNFSF8	944
hsa-miR-10b-5p	TNRC6B	23112
hsa-miR-10b-5p	TP53	7157
hsa-miR-10b-5p	TPM1	7168
hsa-miR-10b-5p	TPP2	7174
hsa-miR-10b-5p	TRA2B	6434
hsa-miR-10b-5p	TRAPPC2	6399
hsa-miR-10b-5p	TRIM36	55521
hsa-miR-10b-5p	TRMT2B	79979
hsa-miR-10b-5p	USP15	9958
hsa-miR-10b-5p	USP46	64854
hsa-miR-10b-5p	WDR55	54853
hsa-miR-10b-5p	XPNPEP3	63929
hsa-miR-10b-5p	YAF2	10138
hsa-miR-10b-5p	ZBTB3	79842
hsa-miR-10b-5p	ZC3HAV1	56829
hsa-miR-10b-5p	ZEB1	6935
hsa-miR-10b-5p	ZFYVE27	118813
hsa-miR-10b-5p	ZNF154	7710
hsa-miR-10b-5p	ZNF215	7762
hsa-miR-10b-5p	ZNF43	7594
hsa-miR-10b-5p	ZNF492	57615
hsa-miR-10b-5p	ZNF502	91392
hsa-miR-10b-5p	ZNF850	342892
hsa-miR-10b-5p	ZSCAN22	342945
hsa-miR-145-3p	AHCYL2	23382
hsa-miR-145-3p	APOL6	80830
hsa-miR-145-3p	ARNT	405
hsa-miR-145-3p	ARRDC4	91947
hsa-miR-145-3p	ATP6V1G2	534
hsa-miR-145-3p	ATRX	546
hsa-miR-145-3p	ATXN7L3B	552889
hsa-miR-145-3p	AXIN2	8313
hsa-miR-145-3p	BMS1	9790
hsa-miR-145-3p	C16orf54	283897
hsa-miR-145-3p	CAMK2G	818
hsa-miR-145-3p	CCNC	892
hsa-miR-145-3p	CMBL	134147
hsa-miR-145-3p	COPG1	22820
hsa-miR-145-3p	CPQ	10404
hsa-miR-145-3p	CREBZF	58487
hsa-miR-145-3p	CRLF3	51379
hsa-miR-145-3p	CTPS2	56474
hsa-miR-145-3p	CTSO	1519
hsa-miR-145-3p	DCK	1633
hsa-miR-145-3p	DCUN1D5	84259
hsa-miR-145-3p	DISC1	27185
hsa-miR-145-3p	DLG2	1740
hsa-miR-145-3p	EIF4E3	317649
hsa-miR-145-3p	ENTPD1	953
hsa-miR-145-3p	FAM227A	646851
hsa-miR-145-3p	FUT9	10690
hsa-miR-145-3p	GFRA4	64096
hsa-miR-145-3p	GPR158	57512
hsa-miR-145-3p	ITGB3	3690
hsa-miR-145-3p	KANSL3	55683
hsa-miR-145-3p	KCNJ3	3760
hsa-miR-145-3p	KCNQ3	3786
hsa-miR-145-3p	KRT20	54474
hsa-miR-145-3p	LPCAT3	10162
hsa-miR-145-3p	LRRC2	79442
hsa-miR-145-3p	MACROD2	140733
hsa-miR-145-3p	MALT1	10892
hsa-miR-145-3p	MLEC	9761
hsa-miR-145-3p	MMP16	4325
hsa-miR-145-3p	MTDH	92140
hsa-miR-145-3p	NDUFS1	4719
hsa-miR-145-3p	NFIA	4774
hsa-miR-145-3p	NFYC	4802
hsa-miR-145-3p	NSL1	25936
hsa-miR-145-3p	NUS1	116150
hsa-miR-145-3p	OAS2	4939
hsa-miR-145-3p	ODF2L	57489
hsa-miR-145-3p	OXTR	5021
hsa-miR-145-3p	PARVA	55742
hsa-miR-145-3p	PAX3	5077
hsa-miR-145-3p	PAX8	7849
hsa-miR-145-3p	PBX3	5090
hsa-miR-145-3p	PIRT	644139
hsa-miR-145-3p	PLCE1	51196
hsa-miR-145-3p	RAPGEF4	11069
hsa-miR-145-3p	RASSF6	166824
hsa-miR-145-3p	RLIM	51132
hsa-miR-145-3p	RND3	390
hsa-miR-145-3p	SAV1	60485
hsa-miR-145-3p	SCUBE2	57758
hsa-miR-145-3p	SERPINA1	5265
hsa-miR-145-3p	SERPINB5	5268
hsa-miR-145-3p	SLC1A2	6506
hsa-miR-145-3p	SLC24A2	25769
hsa-miR-145-3p	SLC2A5	6518
hsa-miR-145-3p	SLC31A1	1317
hsa-miR-145-3p	SLC4A8	9498
hsa-miR-145-3p	SLC7A6	9057
hsa-miR-145-3p	SLC8A3	6547
hsa-miR-145-3p	SLCO1A2	6579
hsa-miR-145-3p	SMAD3	4088
hsa-miR-145-3p	SMAD4	4089
hsa-miR-145-3p	SMCHD1	23347
hsa-miR-145-3p	SMG7	9887
hsa-miR-145-3p	SRSF3	6428
hsa-miR-145-3p	ST8SIA3	51046
hsa-miR-145-3p	STXBP5L	9515
hsa-miR-145-3p	SYNJ2	8871
hsa-miR-145-3p	SYNPO2	171024
hsa-miR-145-3p	THAP10	56906
hsa-miR-145-3p	TIAL1	7073
hsa-miR-145-3p	TMC8	147138
hsa-miR-145-3p	TPH1	7166
hsa-miR-145-3p	TRADD	8717
hsa-miR-145-3p	TRIM2	23321
hsa-miR-145-3p	TRIM44	54765
hsa-miR-145-3p	TRPC5	7224
hsa-miR-145-3p	TUFT1	7286
hsa-miR-145-3p	TXNDC12	51060
hsa-miR-145-3p	UBE4A	9354
hsa-miR-145-3p	UNC5D	137970
hsa-miR-145-3p	YES1	7525
hsa-miR-145-3p	ZMYND11	10771
hsa-miR-145-3p	ZNF22	7570
hsa-miR-145-3p	ZNF75D	7626
hsa-miR-146b-5p	AAK1	22848
hsa-miR-146b-5p	AGMAT	79814
hsa-miR-146b-5p	AMPH	273
hsa-miR-146b-5p	ARF6	382
hsa-miR-146b-5p	ARFGAP3	26286
hsa-miR-146b-5p	ARL17A	51326
hsa-miR-146b-5p	ARSB	411
hsa-miR-146b-5p	BCORL1	63035
hsa-miR-146b-5p	BHLHE41	79365
hsa-miR-146b-5p	BRCA2	675
hsa-miR-146b-5p	BRK1	55845
hsa-miR-146b-5p	BZW1	9689
hsa-miR-146b-5p	C16orf72	29035
hsa-miR-146b-5p	C3orf38	285237
hsa-miR-146b-5p	C4orf3	401152
hsa-miR-146b-5p	C9orf72	203228
hsa-miR-146b-5p	CASK	8573
hsa-miR-146b-5p	CASR	846
hsa-miR-146b-5p	CCDC117	150275
hsa-miR-146b-5p	CCDC89	220388
hsa-miR-146b-5p	CCK	885
hsa-miR-146b-5p	CD80	941
hsa-miR-146b-5p	CD96	10225
hsa-miR-146b-5p	CFH	3075
hsa-miR-146b-5p	CLASP2	23122
hsa-miR-146b-5p	CLCN6	1185
hsa-miR-146b-5p	CLDN11	5010
hsa-miR-146b-5p	CNTF	1270
hsa-miR-146b-5p	COPS8	10920
hsa-miR-146b-5p	CRAMP1L	57585
hsa-miR-146b-5p	CREBL2	1389
hsa-miR-146b-5p	CTAGE4	100128553
hsa-miR-146b-5p	CTAGE9	643854
hsa-miR-146b-5p	DCAF5	8816
hsa-miR-146b-5p	DDHD1	80821
hsa-miR-146b-5p	DIS3L	115752
hsa-miR-146b-5p	DLGAP2	9228
hsa-miR-146b-5p	DNAL1	83544
hsa-miR-146b-5p	DTNA	1837
hsa-miR-146b-5p	DTWD2	285605
hsa-miR-146b-5p	EGFR	1956
hsa-miR-146b-5p	EIF4G2	1982
hsa-miR-146b-5p	ENTPD1	953
hsa-miR-146b-5p	ERBB4	2066
hsa-miR-146b-5p	ERV3-1	2086
hsa-miR-146b-5p	ESYT2	57488
hsa-miR-146b-5p	FAF2	23197
hsa-miR-146b-5p	FAM122C	159091
hsa-miR-146b-5p	FAM210A	125228
hsa-miR-146b-5p	FAM26E	254228
hsa-miR-146b-5p	FBXO4	26272
hsa-miR-146b-5p	FBXW2	26190
hsa-miR-146b-5p	FMNL3	91010
hsa-miR-146b-5p	FNBP4	23360
hsa-miR-146b-5p	FOXR2	139628
hsa-miR-146b-5p	FTCD	10841
hsa-miR-146b-5p	FZD3	7976
hsa-miR-146b-5p	GCFC2	6936
hsa-miR-146b-5p	GJC1	10052
hsa-miR-146b-5p	GPX6	257202
hsa-miR-146b-5p	HDAC8	55869
hsa-miR-146b-5p	HEYL	26508
hsa-miR-146b-5p	HMBOX1	79618
hsa-miR-146b-5p	HNRNPD	3184
hsa-miR-146b-5p	IBA57	200205
hsa-miR-146b-5p	IER5L	389792
hsa-miR-146b-5p	IFIT3	3437
hsa-miR-146b-5p	IGSF1	3547
hsa-miR-146b-5p	IL17A	3605
hsa-miR-146b-5p	IL6	3569
hsa-miR-146b-5p	IQGAP1	8826
hsa-miR-146b-5p	IQGAP3	128239
hsa-miR-146b-5p	IRAK1	3654
hsa-miR-146b-5p	ITCH	83737
hsa-miR-146b-5p	JAZF1	221895
hsa-miR-146b-5p	KCNJ16	3773
hsa-miR-146b-5p	KDM2B	84678
hsa-miR-146b-5p	KIAA1161	57462
hsa-miR-146b-5p	KIAA1199	57214
hsa-miR-146b-5p	KIAA1244	57221
hsa-miR-146b-5p	KIAA1715	80856
hsa-miR-146b-5p	KIT	3815
hsa-miR-146b-5p	KRTAP1-5	83895
hsa-miR-146b-5p	LANCL1	10314
hsa-miR-146b-5p	LCOR	84458
hsa-miR-146b-5p	LOC400682	400682
hsa-miR-146b-5p	LOH12CR1	118426
hsa-miR-146b-5p	LPGAT1	9926
hsa-miR-146b-5p	LPP	4026
hsa-miR-146b-5p	LRCH1	23143
hsa-miR-146b-5p	LRP2	4036
hsa-miR-146b-5p	LRRC15	131578
hsa-miR-146b-5p	MALAT1	378938
hsa-miR-146b-5p	MARCH6	10299
hsa-miR-146b-5p	MARK1	4139
hsa-miR-146b-5p	MED1	5469
hsa-miR-146b-5p	MINOS1	440574
hsa-miR-146b-5p	MLLT1	4298
hsa-miR-146b-5p	MMP16	4325
hsa-miR-146b-5p	MOB1B	92597
hsa-miR-146b-5p	MPO	4353
hsa-miR-146b-5p	MRPS14	63931
hsa-miR-146b-5p	MRS2	57380
hsa-miR-146b-5p	MS4A1	931
hsa-miR-146b-5p	MSANTD3	91283
hsa-miR-146b-5p	MSANTD4	84437
hsa-miR-146b-5p	MTAP	4507
hsa-miR-146b-5p	NFKB1	4790
hsa-miR-146b-5p	NOS1	4842
hsa-miR-146b-5p	NOTCH2	4853
hsa-miR-146b-5p	NOVA1	4857
hsa-miR-146b-5p	NRAS	4893
hsa-miR-146b-5p	NSL1	25936
hsa-miR-146b-5p	ONECUT2	9480
hsa-miR-146b-5p	OPALIN	93377
hsa-miR-146b-5p	OR9Q1	219956
hsa-miR-146b-5p	PAQR9	344838
hsa-miR-146b-5p	PARK2	5071
hsa-miR-146b-5p	PAX8	7849
hsa-miR-146b-5p	PCDH1	5097
hsa-miR-146b-5p	PDGFRA	5156
hsa-miR-146b-5p	PHF20L1	51105
hsa-miR-146b-5p	PHKB	5257
hsa-miR-146b-5p	PID1	55022
hsa-miR-146b-5p	PLEKHA8	84725
hsa-miR-146b-5p	PLEKHM3	389072
hsa-miR-146b-5p	PLSCR4	57088
hsa-miR-146b-5p	PMAIP1	5366
hsa-miR-146b-5p	PMEPA1	56937
hsa-miR-146b-5p	POFUT2	23275
hsa-miR-146b-5p	PPBP	5473
hsa-miR-146b-5p	PPM1K	152926
hsa-miR-146b-5p	PPP2R5C	5527
hsa-miR-146b-5p	PRKCE	5581
hsa-miR-146b-5p	PRMT3	10196
hsa-miR-146b-5p	PSMD3	5709
hsa-miR-146b-5p	PSMF1	9491
hsa-miR-146b-5p	PTAR1	375743
hsa-miR-146b-5p	PTGS2	5743
hsa-miR-146b-5p	PTPRE	5791
hsa-miR-146b-5p	RAB8B	51762
hsa-miR-146b-5p	RAC1	5879
hsa-miR-146b-5p	RACGAP1	29127
hsa-miR-146b-5p	RARB	5915
hsa-miR-146b-5p	RASGRP1	10125
hsa-miR-146b-5p	RFX7	64864
hsa-miR-146b-5p	RHOBTB3	22836
hsa-miR-146b-5p	RHOXF2B	727940
hsa-miR-146b-5p	RPL34	6164
hsa-miR-146b-5p	RPS6KA6	27330
hsa-miR-146b-5p	RUNDC3B	154661
hsa-miR-146b-5p	SCN3B	55800
hsa-miR-146b-5p	SDHC	6391
hsa-miR-146b-5p	SEC23IP	11196
hsa-miR-146b-5p	SEPT14	346288
hsa-miR-146b-5p	SIX4	51804
hsa-miR-146b-5p	SLC10A3	8273
hsa-miR-146b-5p	SLC1A1	6505
hsa-miR-146b-5p	SLC38A1	81539
hsa-miR-146b-5p	SLC5A5	6528
hsa-miR-146b-5p	SMAD4	4089
hsa-miR-146b-5p	SORT1	6272
hsa-miR-146b-5p	SPOPL	339745
hsa-miR-146b-5p	SRP72	6731
hsa-miR-146b-5p	SRPRB	58477
hsa-miR-146b-5p	SRSF12	135295
hsa-miR-146b-5p	SRSF6	6431
hsa-miR-146b-5p	ST7L	54879
hsa-miR-146b-5p	STIL	6491
hsa-miR-146b-5p	STRBP	55342
hsa-miR-146b-5p	SVIL	6840
hsa-miR-146b-5p	SYNJ2	8871
hsa-miR-146b-5p	SYT13	57586
hsa-miR-146b-5p	SYT14	255928
hsa-miR-146b-5p	TBC1D20	128637
hsa-miR-146b-5p	TBRG1	84897
hsa-miR-146b-5p	TBX18	9096
hsa-miR-146b-5p	TDRKH	11022
hsa-miR-146b-5p	THAP5	168451
hsa-miR-146b-5p	TIFA	92610
hsa-miR-146b-5p	TIMELESS	8914
hsa-miR-146b-5p	TLR4	7099
hsa-miR-146b-5p	TMEM185B	79134
hsa-miR-146b-5p	TMEM19	55266
hsa-miR-146b-5p	TMX3	54495
hsa-miR-146b-5p	TOR1A	1861
hsa-miR-146b-5p	TRAF6	7189
hsa-miR-146b-5p	TRDMT1	1787
hsa-miR-146b-5p	TRIM5	85363
hsa-miR-146b-5p	TRIM66	9866
hsa-miR-146b-5p	TRIT1	54802
hsa-miR-146b-5p	TRMT1L	81627
hsa-miR-146b-5p	TSPYL1	7259
hsa-miR-146b-5p	UBR5	51366
hsa-miR-146b-5p	UHRF1	29128
hsa-miR-146b-5p	UMPS	7372
hsa-miR-146b-5p	UPP2	151531
hsa-miR-146b-5p	USP3	9960
hsa-miR-146b-5p	USP47	55031
hsa-miR-146b-5p	VPS54	51542
hsa-miR-146b-5p	WISP1	8840
hsa-miR-146b-5p	WWC2	80014
hsa-miR-146b-5p	YES1	7525
hsa-miR-146b-5p	ZBTB2	57621
hsa-miR-146b-5p	ZC3H12B	340554
hsa-miR-146b-5p	ZDHHC13	54503
hsa-miR-146b-5p	ZFAND5	7763
hsa-miR-146b-5p	ZNF117	51351
hsa-miR-146b-5p	ZNF138	7697
hsa-miR-146b-5p	ZNF253	56242
hsa-miR-146b-5p	ZNF257	113835
hsa-miR-146b-5p	ZNF331	55422
hsa-miR-146b-5p	ZNF354B	117608
hsa-miR-146b-5p	ZNF449	203523
hsa-miR-146b-5p	ZNF506	440515
hsa-miR-146b-5p	ZNF540	163255
hsa-miR-146b-5p	ZNF555	148254
hsa-miR-146b-5p	ZNF605	100289635
hsa-miR-146b-5p	ZNF649	65251
hsa-miR-146b-5p	ZNF662	389114
hsa-miR-146b-5p	ZNF90	7643
hsa-miR-146b-5p	ZNRF3	84133
hsa-miR-181a-5p	AAK1	22848
hsa-miR-181a-5p	AASDHPPT	60496
hsa-miR-181a-5p	ABCG2	9429
hsa-miR-181a-5p	ABHD13	84945
hsa-miR-181a-5p	ACP1	52
hsa-miR-181a-5p	ACSL1	2180
hsa-miR-181a-5p	ACVR2A	92
hsa-miR-181a-5p	ACVR2B	93
hsa-miR-181a-5p	ACYP1	97
hsa-miR-181a-5p	ADAM11	4185
hsa-miR-181a-5p	ADAMTS18	170692
hsa-miR-181a-5p	ADAMTS5	11096
hsa-miR-181a-5p	ADAMTSL1	92949
hsa-miR-181a-5p	ADARB2	105
hsa-miR-181a-5p	ADCK3	56997
hsa-miR-181a-5p	ADO	84890
hsa-miR-181a-5p	AFF2	2334
hsa-miR-181a-5p	AGK	55750
hsa-miR-181a-5p	AGO4	192670
hsa-miR-181a-5p	AHCTF1	25909
hsa-miR-181a-5p	AHR	196
hsa-miR-181a-5p	AIM1L	55057
hsa-miR-181a-5p	AK9	221264
hsa-miR-181a-5p	AKAP5	9495
hsa-miR-181a-5p	AKAP6	9472
hsa-miR-181a-5p	AKAP7	9465
hsa-miR-181a-5p	AKT3	10000
hsa-miR-181a-5p	ALDH9A1	223
hsa-miR-181a-5p	ALG9	79796
hsa-miR-181a-5p	ANAPC16	119504
hsa-miR-181a-5p	ANKRD13C	81573
hsa-miR-181a-5p	ANKRD34C	390616
hsa-miR-181a-5p	ANKRD44	91526
hsa-miR-181a-5p	ANTXR2	118429
hsa-miR-181a-5p	AP1G1	164
hsa-miR-181a-5p	ARF6	382
hsa-miR-181a-5p	ARFGEF2	10564
hsa-miR-181a-5p	ARHGAP26	23092
hsa-miR-181a-5p	ARHGEF3	50650
hsa-miR-181a-5p	ARHGEF7	8874
hsa-miR-181a-5p	ARL5A	26225
hsa-miR-181a-5p	ARL5B	221079
hsa-miR-181a-5p	ARMC8	25852
hsa-miR-181a-5p	ARRDC4	91947
hsa-miR-181a-5p	ARSJ	79642
hsa-miR-181a-5p	ATF1	466
hsa-miR-181a-5p	ATG5	9474
hsa-miR-181a-5p	ATM	472
hsa-miR-181a-5p	ATP11C	286410
hsa-miR-181a-5p	ATP1B1	481
hsa-miR-181a-5p	ATP1B2	482
hsa-miR-181a-5p	ATP2A2	488
hsa-miR-181a-5p	ATP2B1	490
hsa-miR-181a-5p	ATP2B2	491
hsa-miR-181a-5p	ATP6V1C2	245973
hsa-miR-181a-5p	ATRN	8455
hsa-miR-181a-5p	ATXN1	6310
hsa-miR-181a-5p	ATXN3	4287
hsa-miR-181a-5p	ATXN7	6314
hsa-miR-181a-5p	B3GNT5	84002
hsa-miR-181a-5p	BAG4	9530
hsa-miR-181a-5p	BAI3	577
hsa-miR-181a-5p	BAX	581
hsa-miR-181a-5p	BCHE	590
hsa-miR-181a-5p	BCL2	596
hsa-miR-181a-5p	BCL2L11	10018
hsa-miR-181a-5p	BEND3	57673
hsa-miR-181a-5p	BIRC6	57448
hsa-miR-181a-5p	BLOC1S6	26258
hsa-miR-181a-5p	BMP2K	55589
hsa-miR-181a-5p	BRAP	8315
hsa-miR-181a-5p	BRD1	23774
hsa-miR-181a-5p	BRWD1	54014
hsa-miR-181a-5p	BTBD3	22903
hsa-miR-181a-5p	C11orf87	399947
hsa-miR-181a-5p	C15orf48	84419
hsa-miR-181a-5p	C19orf12	83636
hsa-miR-181a-5p	C2CD5	9847
hsa-miR-181a-5p	C2orf69	205327
hsa-miR-181a-5p	C3orf80	401097
hsa-miR-181a-5p	C5orf47	133491
hsa-miR-181a-5p	C6orf89	221477
hsa-miR-181a-5p	C8orf59	401466
hsa-miR-181a-5p	CA5B	11238
hsa-miR-181a-5p	CALB1	793
hsa-miR-181a-5p	CALCR	799
hsa-miR-181a-5p	CALCRL	10203
hsa-miR-181a-5p	CAMK2D	817
hsa-miR-181a-5p	CAPRIN1	4076
hsa-miR-181a-5p	CARD8	22900
hsa-miR-181a-5p	CASK	8573
hsa-miR-181a-5p	CBLL1	79872
hsa-miR-181a-5p	CBX4	8535
hsa-miR-181a-5p	CBX7	23492
hsa-miR-181a-5p	CCAR1	55749
hsa-miR-181a-5p	CCDC117	150275
hsa-miR-181a-5p	CCDC14	64770
hsa-miR-181a-5p	CCDC144NL	339184
hsa-miR-181a-5p	CCDC25	55246
hsa-miR-181a-5p	CCDC42	146849
hsa-miR-181a-5p	CCDC88C	440193
hsa-miR-181a-5p	CCNJ	54619
hsa-miR-181a-5p	CCSAP	126731
hsa-miR-181a-5p	CCT8L2	150160
hsa-miR-181a-5p	CD302	9936
hsa-miR-181a-5p	CD48	962
hsa-miR-181a-5p	CDC14B	8555
hsa-miR-181a-5p	CDKN1A	1026
hsa-miR-181a-5p	CDKN1B	1027
hsa-miR-181a-5p	CDKN2AIP	55602
hsa-miR-181a-5p	CDX2	1045
hsa-miR-181a-5p	CEBPA	1050
hsa-miR-181a-5p	CEBPG	1054
hsa-miR-181a-5p	CEP120	153241
hsa-miR-181a-5p	CERS3	204219
hsa-miR-181a-5p	CETN3	1070
hsa-miR-181a-5p	CHCHD7	79145
hsa-miR-181a-5p	CHMP1B	57132
hsa-miR-181a-5p	CHMP2B	25978
hsa-miR-181a-5p	CLIP1	6249
hsa-miR-181a-5p	CLMN	79789
hsa-miR-181a-5p	CLN8	2055
hsa-miR-181a-5p	CLVS1	157807
hsa-miR-181a-5p	CNNM2	54805
hsa-miR-181a-5p	CNOT2	4848
hsa-miR-181a-5p	CNR1	1268
hsa-miR-181a-5p	COL16A1	1307
hsa-miR-181a-5p	COL19A1	1310
hsa-miR-181a-5p	COPS2	9318
hsa-miR-181a-5p	CPD	1362
hsa-miR-181a-5p	CPEB4	80315
hsa-miR-181a-5p	CPOX	1371
hsa-miR-181a-5p	CPSF6	11052
hsa-miR-181a-5p	CREB1	1385
hsa-miR-181a-5p	CREB5	9586
hsa-miR-181a-5p	CREBRF	153222
hsa-miR-181a-5p	CREBZF	58487
hsa-miR-181a-5p	CSF2RB	1439
hsa-miR-181a-5p	CTDSPL	10217
hsa-miR-181a-5p	CTNNA1	1495
hsa-miR-181a-5p	CTNNB1	1499
hsa-miR-181a-5p	CTTNBP2NL	55917
hsa-miR-181a-5p	CUL3	8452
hsa-miR-181a-5p	CXCL1	2919
hsa-miR-181a-5p	CXorf23	256643
hsa-miR-181a-5p	CYB561D1	284613
hsa-miR-181a-5p	CYR61	3491
hsa-miR-181a-5p	DCLK1	9201
hsa-miR-181a-5p	DCN	1634
hsa-miR-181a-5p	DCUN1D5	84259
hsa-miR-181a-5p	DDIT4	54541
hsa-miR-181a-5p	DDX3X	1654
hsa-miR-181a-5p	DDX3Y	8653
hsa-miR-181a-5p	DDX52	11056
hsa-miR-181a-5p	DEPTOR	64798
hsa-miR-181a-5p	DGKH	160851
hsa-miR-181a-5p	DIP2C	22982
hsa-miR-181a-5p	DLGAP1	9229
hsa-miR-181a-5p	DLGAP2	9228
hsa-miR-181a-5p	DMGDH	29958
hsa-miR-181a-5p	DMXL2	23312
hsa-miR-181a-5p	DNAH8	1769
hsa-miR-181a-5p	DOCK10	55619
hsa-miR-181a-5p	DOCK4	9732
hsa-miR-181a-5p	DOCK7	85440
hsa-miR-181a-5p	DSC3	1825
hsa-miR-181a-5p	DUSP5	1847
hsa-miR-181a-5p	DUSP6	1848
hsa-miR-181a-5p	DYNC1LI2	1783
hsa-miR-181a-5p	E2F5	1875
hsa-miR-181a-5p	E2F7	144455
hsa-miR-181a-5p	EGR1	1958
hsa-miR-181a-5p	EHF	26298
hsa-miR-181a-5p	EIF4A2	1974
hsa-miR-181a-5p	ELAVL2	1993
hsa-miR-181a-5p	ELAVL4	1996
hsa-miR-181a-5p	ELMSAN1	91748
hsa-miR-181a-5p	EN2	2020
hsa-miR-181a-5p	ENDOD1	23052
hsa-miR-181a-5p	ENPP1	5167
hsa-miR-181a-5p	EPC2	26122
hsa-miR-181a-5p	EREG	2069
hsa-miR-181a-5p	ERI1	90459
hsa-miR-181a-5p	ERMAP	114625
hsa-miR-181a-5p	ESCO2	157570
hsa-miR-181a-5p	ESR1	2099
hsa-miR-181a-5p	ETV6	2120
hsa-miR-181a-5p	EXD1	161829
hsa-miR-181a-5p	EXOC2	55770
hsa-miR-181a-5p	EXOC5	10640
hsa-miR-181a-5p	EYS	346007
hsa-miR-181a-5p	F5	2153
hsa-miR-181a-5p	FAM105B	90268
hsa-miR-181a-5p	FAM135A	57579
hsa-miR-181a-5p	FAM13B	51306
hsa-miR-181a-5p	FAM160A2	84067
hsa-miR-181a-5p	FAM179B	23116
hsa-miR-181a-5p	FAM3C	10447
hsa-miR-181a-5p	FAN1	22909
hsa-miR-181a-5p	FAT3	120114
hsa-miR-181a-5p	FBN2	2201
hsa-miR-181a-5p	FBXL3	26224
hsa-miR-181a-5p	FBXO33	254170
hsa-miR-181a-5p	FBXO45	200933
hsa-miR-181a-5p	FIGN	55137
hsa-miR-181a-5p	FKBP1A	2280
hsa-miR-181a-5p	FLVCR1	28982
hsa-miR-181a-5p	FMNL2	114793
hsa-miR-181a-5p	FNDC3B	64778
hsa-miR-181a-5p	FOS	2353
hsa-miR-181a-5p	FOXK1	221937
hsa-miR-181a-5p	FOXP1	27086
hsa-miR-181a-5p	FRMD7	90167
hsa-miR-181a-5p	FUT1	2523
hsa-miR-181a-5p	FUT9	10690
hsa-miR-181a-5p	FZD3	7976
hsa-miR-181a-5p	GAB1	2549
hsa-miR-181a-5p	GABRA1	2554
hsa-miR-181a-5p	GAPT	202309
hsa-miR-181a-5p	GAS7	8522
hsa-miR-181a-5p	GATA6	2627
hsa-miR-181a-5p	GATM	2628
hsa-miR-181a-5p	GDA	9615
hsa-miR-181a-5p	GFPT1	2673
hsa-miR-181a-5p	GHITM	27069
hsa-miR-181a-5p	GID4	79018
hsa-miR-181a-5p	GIMAP1	170575
hsa-miR-181a-5p	GLDN	342035
hsa-miR-181a-5p	GLRX	2745
hsa-miR-181a-5p	GLS	2744
hsa-miR-181a-5p	GNA12	2768
hsa-miR-181a-5p	GNB4	59345
hsa-miR-181a-5p	GOLGA6L10	647042
hsa-miR-181a-5p	GP5	2814
hsa-miR-181a-5p	GPATCH11	253635
hsa-miR-181a-5p	GPBP1	65056
hsa-miR-181a-5p	GPCPD1	56261
hsa-miR-181a-5p	GPD1L	23171
hsa-miR-181a-5p	GPR137C	283554
hsa-miR-181a-5p	GPR26	2849
hsa-miR-181a-5p	GPR78	27201
hsa-miR-181a-5p	GPR83	10888
hsa-miR-181a-5p	GPX8	493869
hsa-miR-181a-5p	GRB10	2887
hsa-miR-181a-5p	GREM1	26585
hsa-miR-181a-5p	GRIN2A	2903
hsa-miR-181a-5p	GRM5	2915
hsa-miR-181a-5p	GSKIP	51527
hsa-miR-181a-5p	GSTCD	79807
hsa-miR-181a-5p	GTF2H5	404672
hsa-miR-181a-5p	GYPA	2993
hsa-miR-181a-5p	H2AFV	94239
hsa-miR-181a-5p	HAUS3	79441
hsa-miR-181a-5p	HECA	51696
hsa-miR-181a-5p	HEPHL1	341208
hsa-miR-181a-5p	HEY2	23493
hsa-miR-181a-5p	HIC2	23119
hsa-miR-181a-5p	HIPK2	28996
hsa-miR-181a-5p	HK2	3099
hsa-miR-181a-5p	HLF	3131
hsa-miR-181a-5p	HMGB2	3148
hsa-miR-181a-5p	HOOK1	51361
hsa-miR-181a-5p	HOOK3	84376
hsa-miR-181a-5p	HRAS	3265
hsa-miR-181a-5p	HSP90B1	7184
hsa-miR-181a-5p	IFNA4	3441
hsa-miR-181a-5p	IFNG	3458
hsa-miR-181a-5p	IFT74	80173
hsa-miR-181a-5p	IFT81	28981
hsa-miR-181a-5p	IL1A	3552
hsa-miR-181a-5p	IL1RAP	3556
hsa-miR-181a-5p	IL2	3558
hsa-miR-181a-5p	INO80D	54891
hsa-miR-181a-5p	INPP4A	3631
hsa-miR-181a-5p	INPP4B	8821
hsa-miR-181a-5p	IPMK	253430
hsa-miR-181a-5p	IPO5	3843
hsa-miR-181a-5p	IRF5	3663
hsa-miR-181a-5p	IRS2	8660
hsa-miR-181a-5p	ITGA2	3673
hsa-miR-181a-5p	ITGB8	3696
hsa-miR-181a-5p	ITSN1	6453
hsa-miR-181a-5p	JAZF1	221895
hsa-miR-181a-5p	KAT2B	8850
hsa-miR-181a-5p	KATNBL1	79768
hsa-miR-181a-5p	KCNA4	3739
hsa-miR-181a-5p	KCNH1	3756
hsa-miR-181a-5p	KCNH8	131096
hsa-miR-181a-5p	KCNK10	54207
hsa-miR-181a-5p	KCNMB2	10242
hsa-miR-181a-5p	KCNN3	3782
hsa-miR-181a-5p	KCNQ5	56479
hsa-miR-181a-5p	KDM5A	5927
hsa-miR-181a-5p	KIAA0195	9772
hsa-miR-181a-5p	KIAA0247	9766
hsa-miR-181a-5p	KIAA1239	57495
hsa-miR-181a-5p	KIAA1244	57221
hsa-miR-181a-5p	KIAA1324L	222223
hsa-miR-181a-5p	KIAA1549L	25758
hsa-miR-181a-5p	KIF3A	11127
hsa-miR-181a-5p	KIF3B	9371
hsa-miR-181a-5p	KITLG	4254
hsa-miR-181a-5p	KLF3	51274
hsa-miR-181a-5p	KLF6	1316
hsa-miR-181a-5p	KLHL29	114818
hsa-miR-181a-5p	KLHL42	57542
hsa-miR-181a-5p	KLHL5	51088
hsa-miR-181a-5p	KMT2A	4297
hsa-miR-181a-5p	KMT2E	55904
hsa-miR-181a-5p	KPNA4	3840
hsa-miR-181a-5p	KPNB1	3837
hsa-miR-181a-5p	KRAS	3845
hsa-miR-181a-5p	KRIT1	889
hsa-miR-181a-5p	LAMP2	3920
hsa-miR-181a-5p	LARP4	113251
hsa-miR-181a-5p	LCOR	84458
hsa-miR-181a-5p	LHFPL3	375612
hsa-miR-181a-5p	LIFR	3977
hsa-miR-181a-5p	LMAN1	3998
hsa-miR-181a-5p	LMO3	55885
hsa-miR-181a-5p	LOC100653247	100653247
hsa-miR-181a-5p	LOX	4015
hsa-miR-181a-5p	LPCAT2	54947
hsa-miR-181a-5p	LPP	4026
hsa-miR-181a-5p	LRRC8D	55144
hsa-miR-181a-5p	LRRN1	57633
hsa-miR-181a-5p	LY75-CD302	100526664
hsa-miR-181a-5p	MAB21L3	126868
hsa-miR-181a-5p	MAGEA4	4103
hsa-miR-181a-5p	MAGOHB	55110
hsa-miR-181a-5p	MAP1B	4131
hsa-miR-181a-5p	MAP2K1	5604
hsa-miR-181a-5p	MAP2K4	6416
hsa-miR-181a-5p	MAP3K3	4215
hsa-miR-181a-5p	MAPK1	5594
hsa-miR-181a-5p	MAPK1IP1L	93487
hsa-miR-181a-5p	MARC2	54996
hsa-miR-181a-5p	MASP1	5648
hsa-miR-181a-5p	MBOAT2	129642
hsa-miR-181a-5p	MBTPS2	51360
hsa-miR-181a-5p	MCL1	4170
hsa-miR-181a-5p	MCTP2	55784
hsa-miR-181a-5p	MCTS1	28985
hsa-miR-181a-5p	MDM4	4194
hsa-miR-181a-5p	MED12L	116931
hsa-miR-181a-5p	MEG3	55384
hsa-miR-181a-5p	MEGF10	84466
hsa-miR-181a-5p	MEGF9	1955
hsa-miR-181a-5p	MET	4233
hsa-miR-181a-5p	METAP1	23173
hsa-miR-181a-5p	METAP2	10988
hsa-miR-181a-5p	MIA2	117153
hsa-miR-181a-5p	MICU3	286097
hsa-miR-181a-5p	MIER3	166968
hsa-miR-181a-5p	MINA	84864
hsa-miR-181a-5p	MIP	4284
hsa-miR-181a-5p	MKLN1	4289
hsa-miR-181a-5p	MLLT10	8028
hsa-miR-181a-5p	MME	4311
hsa-miR-181a-5p	MPP7	143098
hsa-miR-181a-5p	MRPL13	28998
hsa-miR-181a-5p	MTF2	22823
hsa-miR-181a-5p	MTMR12	54545
hsa-miR-181a-5p	MTMR3	8897
hsa-miR-181a-5p	MTX3	345778
hsa-miR-181a-5p	MUC7	4589
hsa-miR-181a-5p	MYO1E	4643
hsa-miR-181a-5p	MYSM1	114803
hsa-miR-181a-5p	NAALADL2	254827
hsa-miR-181a-5p	NAP1L1	4673
hsa-miR-181a-5p	NARG2	79664
hsa-miR-181a-5p	NDC1	55706
hsa-miR-181a-5p	NDRG4	65009
hsa-miR-181a-5p	NEK2	4751
hsa-miR-181a-5p	NEK7	140609
hsa-miR-181a-5p	NELFA	7469
hsa-miR-181a-5p	NFAT5	10725
hsa-miR-181a-5p	NFIB	4781
hsa-miR-181a-5p	NFYB	4801
hsa-miR-181a-5p	NLK	51701
hsa-miR-181a-5p	NLN	57486
hsa-miR-181a-5p	NMT2	9397
hsa-miR-181a-5p	NOTCH1	4851
hsa-miR-181a-5p	NOTCH2	4853
hsa-miR-181a-5p	NOTCH4	4855
hsa-miR-181a-5p	NOVA1	4857
hsa-miR-181a-5p	NPAP1	23742
hsa-miR-181a-5p	NPTXR	23467
hsa-miR-181a-5p	NR1D2	9975
hsa-miR-181a-5p	NR2C2	7182
hsa-miR-181a-5p	NR3C1	2908
hsa-miR-181a-5p	NR4A3	8013
hsa-miR-181a-5p	NR6A1	2649
hsa-miR-181a-5p	NRAS	4893
hsa-miR-181a-5p	NRXN1	9378
hsa-miR-181a-5p	NSUN7	79730
hsa-miR-181a-5p	NTS	4922
hsa-miR-181a-5p	NUCKS1	64710
hsa-miR-181a-5p	NUDT21	11051
hsa-miR-181a-5p	NUDT4	11163
hsa-miR-181a-5p	NUFIP1	26747
hsa-miR-181a-5p	NUFIP2	57532
hsa-miR-181a-5p	OCIAD1	54940
hsa-miR-181a-5p	ONECUT2	9480
hsa-miR-181a-5p	OSBPL2	9885
hsa-miR-181a-5p	OSBPL3	26031
hsa-miR-181a-5p	OSBPL8	114882
hsa-miR-181a-5p	OTUD4	54726
hsa-miR-181a-5p	PABPC5	140886
hsa-miR-181a-5p	PAFAH1B2	5049
hsa-miR-181a-5p	PAG1	55824
hsa-miR-181a-5p	PALM2	114299
hsa-miR-181a-5p	PAM	5066
hsa-miR-181a-5p	PAPD5	64282
hsa-miR-181a-5p	PARK2	5071
hsa-miR-181a-5p	PAWR	5074
hsa-miR-181a-5p	PAX6	5080
hsa-miR-181a-5p	PAX9	5083
hsa-miR-181a-5p	PBX1	5087
hsa-miR-181a-5p	PBX3	5090
hsa-miR-181a-5p	PCDH11Y	83259
hsa-miR-181a-5p	PCDH15	65217
hsa-miR-181a-5p	PCDHA1	56147
hsa-miR-181a-5p	PCDHA10	56139
hsa-miR-181a-5p	PCDHA11	56138
hsa-miR-181a-5p	PCDHA12	56137
hsa-miR-181a-5p	PCDHA13	56136
hsa-miR-181a-5p	PCDHA2	56146
hsa-miR-181a-5p	PCDHA3	56145
hsa-miR-181a-5p	PCDHA4	56144
hsa-miR-181a-5p	PCDHA5	56143
hsa-miR-181a-5p	PCDHA6	56142
hsa-miR-181a-5p	PCDHA7	56141
hsa-miR-181a-5p	PCDHA8	56140
hsa-miR-181a-5p	PCDHA9	9752
hsa-miR-181a-5p	PCDHAC1	56135
hsa-miR-181a-5p	PCDHAC2	56134
hsa-miR-181a-5p	PCGF3	10336
hsa-miR-181a-5p	PCNP	57092
hsa-miR-181a-5p	PCNXL4	64430
hsa-miR-181a-5p	PCSK1	5122
hsa-miR-181a-5p	PDAP1	11333
hsa-miR-181a-5p	PDE5A	8654
hsa-miR-181a-5p	PDGFRA	5156
hsa-miR-181a-5p	PDK1	5163
hsa-miR-181a-5p	PEAK1	79834
hsa-miR-181a-5p	PER3	8863
hsa-miR-181a-5p	PEX13	5194
hsa-miR-181a-5p	PGAP1	80055
hsa-miR-181a-5p	PGPEP1L	145814
hsa-miR-181a-5p	PGR	5241
hsa-miR-181a-5p	PHACTR2	9749
hsa-miR-181a-5p	PHC3	80012
hsa-miR-181a-5p	PHF20L1	51105
hsa-miR-181a-5p	PHLPP2	23035
hsa-miR-181a-5p	PHTF2	57157
hsa-miR-181a-5p	PI4K2B	55300
hsa-miR-181a-5p	PIK3C2A	5286
hsa-miR-181a-5p	PIK3R3	8503
hsa-miR-181a-5p	PKNOX1	5316
hsa-miR-181a-5p	PKP2	5318
hsa-miR-181a-5p	PLAC1L	219990
hsa-miR-181a-5p	PLAG1	5324
hsa-miR-181a-5p	PLAU	5328
hsa-miR-181a-5p	PLD1	5337
hsa-miR-181a-5p	PLEKHA3	65977
hsa-miR-181a-5p	PLEKHA8	84725
hsa-miR-181a-5p	PLG	5340
hsa-miR-181a-5p	PLSCR5	389158
hsa-miR-181a-5p	PMAIP1	5366
hsa-miR-181a-5p	POLI	11201
hsa-miR-181a-5p	POLR3G	10622
hsa-miR-181a-5p	POMC	5443
hsa-miR-181a-5p	POU2F1	5451
hsa-miR-181a-5p	PPARA	5465
hsa-miR-181a-5p	PPIP5K2	23262
hsa-miR-181a-5p	PPP1R12B	4660
hsa-miR-181a-5p	PPP1R3B	79660
hsa-miR-181a-5p	PPP1R3C	5507
hsa-miR-181a-5p	PPP1R3D	5509
hsa-miR-181a-5p	PPP1R9A	55607
hsa-miR-181a-5p	PPP2R5E	5529
hsa-miR-181a-5p	PPP3CA	5530
hsa-miR-181a-5p	PPP3R1	5534
hsa-miR-181a-5p	PRAP1	118471
hsa-miR-181a-5p	PRDX3	10935
hsa-miR-181a-5p	PRH2	5555
hsa-miR-181a-5p	PRKCD	5580
hsa-miR-181a-5p	PRKCE	5581
hsa-miR-181a-5p	PRKG1	5592
hsa-miR-181a-5p	PRKN	5071
hsa-miR-181a-5p	PRLR	5618
hsa-miR-181a-5p	PROCR	10544
hsa-miR-181a-5p	PROSER1	80209
hsa-miR-181a-5p	PROX1	5629
hsa-miR-181a-5p	PRR20A	122183
hsa-miR-181a-5p	PRR20B	729233
hsa-miR-181a-5p	PRR20C	729240
hsa-miR-181a-5p	PRR20D	729246
hsa-miR-181a-5p	PRR20E	729250
hsa-miR-181a-5p	PRRC1	133619
hsa-miR-181a-5p	PRRC2C	23215
hsa-miR-181a-5p	PRRG4	79056
hsa-miR-181a-5p	PRSS16	10279
hsa-miR-181a-5p	PRTG	283659
hsa-miR-181a-5p	PSG11	5680
hsa-miR-181a-5p	PSG3	5671
hsa-miR-181a-5p	PSG5	5673
hsa-miR-181a-5p	PSG9	5678
hsa-miR-181a-5p	PTBP3	9991
hsa-miR-181a-5p	PTEN	5728
hsa-miR-181a-5p	PTGER3	5733
hsa-miR-181a-5p	PTGS2	5743
hsa-miR-181a-5p	PTPN11	5781
hsa-miR-181a-5p	PTPN22	26191
hsa-miR-181a-5p	PTPN9	5780
hsa-miR-181a-5p	PTPRB	5787
hsa-miR-181a-5p	QSER1	79832
hsa-miR-181a-5p	RAB11A	8766
hsa-miR-181a-5p	RAB27B	5874
hsa-miR-181a-5p	RAB3IP	117177
hsa-miR-181a-5p	RAB40B	10966
hsa-miR-181a-5p	RABGEF1	27342
hsa-miR-181a-5p	RAD21	5885
hsa-miR-181a-5p	RALA	5898
hsa-miR-181a-5p	RALGAPB	57148
hsa-miR-181a-5p	RAP1B	5908
hsa-miR-181a-5p	RAP2A	5911
hsa-miR-181a-5p	RAPGEF4	11069
hsa-miR-181a-5p	RASSF1	11186
hsa-miR-181a-5p	RASSF2	9770
hsa-miR-181a-5p	RASSF6	166824
hsa-miR-181a-5p	RASSF8	11228
hsa-miR-181a-5p	RBBP7	5931
hsa-miR-181a-5p	RBM26	64062
hsa-miR-181a-5p	RCOR1	23186
hsa-miR-181a-5p	RECK	8434
hsa-miR-181a-5p	REEP1	65055
hsa-miR-181a-5p	REPS2	9185
hsa-miR-181a-5p	RFC1	5981
hsa-miR-181a-5p	RGS16	6004
hsa-miR-181a-5p	RGS18	64407
hsa-miR-181a-5p	RGS5	8490
hsa-miR-181a-5p	RIMKLA	284716
hsa-miR-181a-5p	RLF	6018
hsa-miR-181a-5p	RNF182	221687
hsa-miR-181a-5p	RNF2	6045
hsa-miR-181a-5p	RNF34	80196
hsa-miR-181a-5p	RNF6	6049
hsa-miR-181a-5p	RNF8	9025
hsa-miR-181a-5p	RNMT	8731
hsa-miR-181a-5p	ROBO2	6092
hsa-miR-181a-5p	RORA	6095
hsa-miR-181a-5p	RPAP2	79871
hsa-miR-181a-5p	RPE65	6121
hsa-miR-181a-5p	RPS6KB1	6198
hsa-miR-181a-5p	RRP15	51018
hsa-miR-181a-5p	RUFY2	55680
hsa-miR-181a-5p	RUNX1	861
hsa-miR-181a-5p	RYR3	6263
hsa-miR-181a-5p	S1PR1	1901
hsa-miR-181a-5p	SAMHD1	25939
hsa-miR-181a-5p	SCD	6319
hsa-miR-181a-5p	SCN9A	6335
hsa-miR-181a-5p	SCOC	60592
hsa-miR-181a-5p	SEC24A	10802
hsa-miR-181a-5p	SEL1L	6400
hsa-miR-181a-5p	SELT	51714
hsa-miR-181a-5p	SEMA3C	10512
hsa-miR-181a-5p	SEMA4G	57715
hsa-miR-181a-5p	SERPINA1	5265
hsa-miR-181a-5p	SERPINE1	5054
hsa-miR-181a-5p	SH2D4A	63898
hsa-miR-181a-5p	SH3TC2	79628
hsa-miR-181a-5p	SHC3	53358
hsa-miR-181a-5p	SHE	126669
hsa-miR-181a-5p	SHQ1	55164
hsa-miR-181a-5p	SIAE	54414
hsa-miR-181a-5p	SIRT1	23411
hsa-miR-181a-5p	SKP1	6500
hsa-miR-181a-5p	SLA	6503
hsa-miR-181a-5p	SLAIN2	57606
hsa-miR-181a-5p	SLC10A7	84068
hsa-miR-181a-5p	SLC11A1	6556
hsa-miR-181a-5p	SLC16A6	9120
hsa-miR-181a-5p	SLC19A2	10560
hsa-miR-181a-5p	SLC22A15	55356
hsa-miR-181a-5p	SLC25A24	29957
hsa-miR-181a-5p	SLC26A4	5172
hsa-miR-181a-5p	SLC2A1	6513
hsa-miR-181a-5p	SLC35C2	51006
hsa-miR-181a-5p	SLC3A1	6519
hsa-miR-181a-5p	SLC4A8	9498
hsa-miR-181a-5p	SLC5A3	6526
hsa-miR-181a-5p	SLC6A2	6530
hsa-miR-181a-5p	SLC7A11	23657
hsa-miR-181a-5p	SLC7A2	6542
hsa-miR-181a-5p	SMLR1	100507203
hsa-miR-181a-5p	SMN1	6606
hsa-miR-181a-5p	SMN2	6607
hsa-miR-181a-5p	SNAPC3	6619
hsa-miR-181a-5p	SOBP	55084
hsa-miR-181a-5p	SOCS4	122809
hsa-miR-181a-5p	SORD	6652
hsa-miR-181a-5p	SOS1	6654
hsa-miR-181a-5p	SOWAHA	134548
hsa-miR-181a-5p	SOX5	6660
hsa-miR-181a-5p	SOX6	55553
hsa-miR-181a-5p	SPIN1	10927
hsa-miR-181a-5p	SPOCK1	6695
hsa-miR-181a-5p	SPP1	6696
hsa-miR-181a-5p	SRPK2	6733
hsa-miR-181a-5p	SRSF7	6432
hsa-miR-181a-5p	SS18L1	26039
hsa-miR-181a-5p	SSB	6741
hsa-miR-181a-5p	ST6GALNAC3	256435
hsa-miR-181a-5p	ST8SIA4	7903
hsa-miR-181a-5p	STAT3	6774
hsa-miR-181a-5p	STC1	6781
hsa-miR-181a-5p	STEAP4	79689
hsa-miR-181a-5p	STRN	6801
hsa-miR-181a-5p	STS	412
hsa-miR-181a-5p	STX7	8417
hsa-miR-181a-5p	SUCLG2	8801
hsa-miR-181a-5p	SULT1C2	6819
hsa-miR-181a-5p	SYNE1	23345
hsa-miR-181a-5p	SYNPO2	171024
hsa-miR-181a-5p	SYT15	83849
hsa-miR-181a-5p	TADA1	117143
hsa-miR-181a-5p	TADA2B	93624
hsa-miR-181a-5p	TAF5L	27097
hsa-miR-181a-5p	TAP2	6891
hsa-miR-181a-5p	TARDBP	23435
hsa-miR-181a-5p	TBC1D1	23216
hsa-miR-181a-5p	TBC1D14	57533
hsa-miR-181a-5p	TBC1D4	9882
hsa-miR-181a-5p	TBCD	6904
hsa-miR-181a-5p	TBL1X	6907
hsa-miR-181a-5p	TBXA2R	6915
hsa-miR-181a-5p	TCERG1	10915
hsa-miR-181a-5p	TCF4	6925
hsa-miR-181a-5p	TCF7L2	6934
hsa-miR-181a-5p	TDRD6	221400
hsa-miR-181a-5p	TERT	7015
hsa-miR-181a-5p	TET2	54790
hsa-miR-181a-5p	TFEC	22797
hsa-miR-181a-5p	TFRC	7037
hsa-miR-181a-5p	TGFBI	7045
hsa-miR-181a-5p	TGFBR1	7046
hsa-miR-181a-5p	TGFBRAP1	9392
hsa-miR-181a-5p	THAP2	83591
hsa-miR-181a-5p	TIA1	7072
hsa-miR-181a-5p	TIFA	92610
hsa-miR-181a-5p	TIMP1	7076
hsa-miR-181a-5p	TIMP3	7078
hsa-miR-181a-5p	TLL1	7092
hsa-miR-181a-5p	TLR4	7099
hsa-miR-181a-5p	TM9SF3	56889
hsa-miR-181a-5p	TMEM106B	54664
hsa-miR-181a-5p	TMEM135	65084
hsa-miR-181a-5p	TMEM181	57583
hsa-miR-181a-5p	TMEM194A	23306
hsa-miR-181a-5p	TMEM196	256130
hsa-miR-181a-5p	TMEM255A	55026
hsa-miR-181a-5p	TMEM26	219623
hsa-miR-181a-5p	TMEM64	169200
hsa-miR-181a-5p	TMEM87B	84910
hsa-miR-181a-5p	TMF1	7110
hsa-miR-181a-5p	TMPRSS2	7113
hsa-miR-181a-5p	TNF	7124
hsa-miR-181a-5p	TNFAIP1	7126
hsa-miR-181a-5p	TNFAIP6	7130
hsa-miR-181a-5p	TNFRSF11B	4982
hsa-miR-181a-5p	TNFSF4	7292
hsa-miR-181a-5p	TNPO1	3842
hsa-miR-181a-5p	TNRC6B	23112
hsa-miR-181a-5p	TNS3	64759
hsa-miR-181a-5p	TOM1L1	10040
hsa-miR-181a-5p	TOR1AIP2	163590
hsa-miR-181a-5p	TOX	9760
hsa-miR-181a-5p	TP63	8626
hsa-miR-181a-5p	TRDMT1	1787
hsa-miR-181a-5p	TRDN	10345
hsa-miR-181a-5p	TRIM2	23321
hsa-miR-181a-5p	TSPAN8	7103
hsa-miR-181a-5p	TUSC3	7991
hsa-miR-181a-5p	TWIST1	7291
hsa-miR-181a-5p	TWISTNB	221830
hsa-miR-181a-5p	TXNDC15	79770
hsa-miR-181a-5p	UBE2A	7319
hsa-miR-181a-5p	UBE2B	7320
hsa-miR-181a-5p	UBE2D1	7321
hsa-miR-181a-5p	UBL3	5412
hsa-miR-181a-5p	UBP1	7342
hsa-miR-181a-5p	UNC80	285175
hsa-miR-181a-5p	USO1	8615
hsa-miR-181a-5p	USP33	23032
hsa-miR-181a-5p	USP9Y	8287
hsa-miR-181a-5p	VANGL1	81839
hsa-miR-181a-5p	VBP1	7411
hsa-miR-181a-5p	VCAN	1462
hsa-miR-181a-5p	VHL	7428
hsa-miR-181a-5p	VIP	7432
hsa-miR-181a-5p	VPS13C	54832
hsa-miR-181a-5p	VTI1A	143187
hsa-miR-181a-5p	WASL	8976
hsa-miR-181a-5p	WDFY3	23001
hsa-miR-181a-5p	WHAMM	123720
hsa-miR-181a-5p	WIF1	11197
hsa-miR-181a-5p	WNT16	51384
hsa-miR-181a-5p	WSCD1	23302
hsa-miR-181a-5p	XIAP	331
hsa-miR-181a-5p	XRRA1	143570
hsa-miR-181a-5p	YPEL1	29799
hsa-miR-181a-5p	YTHDC1	91746
hsa-miR-181a-5p	YWHAG	7532
hsa-miR-181a-5p	ZAK	51776
hsa-miR-181a-5p	ZBTB34	403341
hsa-miR-181a-5p	ZBTB4	57659
hsa-miR-181a-5p	ZBTB43	23099
hsa-miR-181a-5p	ZBTB44	29068
hsa-miR-181a-5p	ZC3H6	376940
hsa-miR-181a-5p	ZDHHC21	340481
hsa-miR-181a-5p	ZDHHC3	51304
hsa-miR-181a-5p	ZFAND4	93550
hsa-miR-181a-5p	ZFP14	57677
hsa-miR-181a-5p	ZFP36L1	677
hsa-miR-181a-5p	ZFP36L2	678
hsa-miR-181a-5p	ZFP62	643836
hsa-miR-181a-5p	ZFP91	80829
hsa-miR-181a-5p	ZFYVE16	9765
hsa-miR-181a-5p	ZFYVE26	23503
hsa-miR-181a-5p	ZIC2	7546
hsa-miR-181a-5p	ZIC3	7547
hsa-miR-181a-5p	ZMYND11	10771
hsa-miR-181a-5p	ZNF124	7678
hsa-miR-181a-5p	ZNF14	7561
hsa-miR-181a-5p	ZNF20	7568
hsa-miR-181a-5p	ZNF217	7764
hsa-miR-181a-5p	ZNF277	11179
hsa-miR-181a-5p	ZNF28	7576
hsa-miR-181a-5p	ZNF37A	7587
hsa-miR-181a-5p	ZNF396	252884
hsa-miR-181a-5p	ZNF441	126068
hsa-miR-181a-5p	ZNF527	84503
hsa-miR-181a-5p	ZNF544	27300
hsa-miR-181a-5p	ZNF555	148254
hsa-miR-181a-5p	ZNF594	84622
hsa-miR-181a-5p	ZNF615	284370
hsa-miR-181a-5p	ZNF654	55279
hsa-miR-181a-5p	ZNF704	619279
hsa-miR-181a-5p	ZNF74	7625
hsa-miR-181a-5p	ZNF763	284390
hsa-miR-181a-5p	ZNF780B	163131
hsa-miR-181a-5p	ZNF814	730051
hsa-miR-181a-5p	ZRANB1	54764
hsa-miR-181a-5p	ZSCAN23	222696
hsa-miR-181b-5p	AAK1	22848
hsa-miR-181b-5p	AASDHPPT	60496
hsa-miR-181b-5p	ABHD13	84945
hsa-miR-181b-5p	ABI3BP	25890
hsa-miR-181b-5p	ACAP2	23527
hsa-miR-181b-5p	ACP1	52
hsa-miR-181b-5p	ACSL1	2180
hsa-miR-181b-5p	ACSL4	2182
hsa-miR-181b-5p	ACVR2A	92
hsa-miR-181b-5p	ACVR2B	93
hsa-miR-181b-5p	ACYP1	97
hsa-miR-181b-5p	ADAM11	4185
hsa-miR-181b-5p	ADAMTS6	11174
hsa-miR-181b-5p	ADAMTSL1	92949
hsa-miR-181b-5p	ADCK3	56997
hsa-miR-181b-5p	ADCY9	115
hsa-miR-181b-5p	ADM	133
hsa-miR-181b-5p	ADO	84890
hsa-miR-181b-5p	AFF2	2334
hsa-miR-181b-5p	AGK	55750
hsa-miR-181b-5p	AHCTF1	25909
hsa-miR-181b-5p	AIM1L	55057
hsa-miR-181b-5p	AK9	221264
hsa-miR-181b-5p	AKAP5	9495
hsa-miR-181b-5p	AKAP6	9472
hsa-miR-181b-5p	AKAP7	9465
hsa-miR-181b-5p	AKT3	10000
hsa-miR-181b-5p	ALDH9A1	223
hsa-miR-181b-5p	ALG9	79796
hsa-miR-181b-5p	ANAPC16	119504
hsa-miR-181b-5p	ANKEF1	63926
hsa-miR-181b-5p	ANKRD13C	81573
hsa-miR-181b-5p	ANKRD33B	651746
hsa-miR-181b-5p	ANKRD44	91526
hsa-miR-181b-5p	ANTXR2	118429
hsa-miR-181b-5p	ARF6	382
hsa-miR-181b-5p	ARFGEF2	10564
hsa-miR-181b-5p	ARHGAP26	23092
hsa-miR-181b-5p	ARHGEF3	50650
hsa-miR-181b-5p	ARHGEF7	8874
hsa-miR-181b-5p	ARL2BP	23568
hsa-miR-181b-5p	ARL5A	26225
hsa-miR-181b-5p	ARL5B	221079
hsa-miR-181b-5p	ARL6IP5	10550
hsa-miR-181b-5p	ARMC8	25852
hsa-miR-181b-5p	ARRDC4	91947
hsa-miR-181b-5p	ARSJ	79642
hsa-miR-181b-5p	ASTN1	460
hsa-miR-181b-5p	ATF1	466
hsa-miR-181b-5p	ATG5	9474
hsa-miR-181b-5p	ATM	472
hsa-miR-181b-5p	ATP11C	286410
hsa-miR-181b-5p	ATP1B1	481
hsa-miR-181b-5p	ATP1B2	482
hsa-miR-181b-5p	ATP2A2	488
hsa-miR-181b-5p	ATP2B1	490
hsa-miR-181b-5p	ATP2B2	491
hsa-miR-181b-5p	ATP6V1C2	245973
hsa-miR-181b-5p	ATRN	8455
hsa-miR-181b-5p	ATXN1	6310
hsa-miR-181b-5p	ATXN3	4287
hsa-miR-181b-5p	ATXN7	6314
hsa-miR-181b-5p	B3GNT5	84002
hsa-miR-181b-5p	BAG4	9530
hsa-miR-181b-5p	BAI3	577
hsa-miR-181b-5p	BBS7	55212
hsa-miR-181b-5p	BCHE	590
hsa-miR-181b-5p	BCL11A	53335
hsa-miR-181b-5p	BCL2	596
hsa-miR-181b-5p	BCL2L11	10018
hsa-miR-181b-5p	BEND3	57673
hsa-miR-181b-5p	BHLHE40	8553
hsa-miR-181b-5p	BIRC6	57448
hsa-miR-181b-5p	BLOC1S6	26258
hsa-miR-181b-5p	BMP2K	55589
hsa-miR-181b-5p	BOLL	66037
hsa-miR-181b-5p	BRAP	8315
hsa-miR-181b-5p	BRD1	23774
hsa-miR-181b-5p	BRWD1	54014
hsa-miR-181b-5p	BTBD3	22903
hsa-miR-181b-5p	C11orf70	85016
hsa-miR-181b-5p	C12orf29	91298
hsa-miR-181b-5p	C15orf48	84419
hsa-miR-181b-5p	C19orf12	83636
hsa-miR-181b-5p	C2orf54	79919
hsa-miR-181b-5p	C3orf80	401097
hsa-miR-181b-5p	C5orf47	133491
hsa-miR-181b-5p	C6orf89	221477
hsa-miR-181b-5p	C7orf41	222166
hsa-miR-181b-5p	C8orf44-SGK3	100533105
hsa-miR-181b-5p	C8orf59	401466
hsa-miR-181b-5p	CA5B	11238
hsa-miR-181b-5p	CALB1	793
hsa-miR-181b-5p	CALCR	799
hsa-miR-181b-5p	CALCRL	10203
hsa-miR-181b-5p	CALM1	801
hsa-miR-181b-5p	CAMK2D	817
hsa-miR-181b-5p	CAPRIN1	4076
hsa-miR-181b-5p	CARD10	29775
hsa-miR-181b-5p	CARD8	22900
hsa-miR-181b-5p	CASK	8573
hsa-miR-181b-5p	CBLL1	79872
hsa-miR-181b-5p	CBX7	23492
hsa-miR-181b-5p	CCAR1	55749
hsa-miR-181b-5p	CCDC117	150275
hsa-miR-181b-5p	CCDC14	64770
hsa-miR-181b-5p	CCDC144NL	339184
hsa-miR-181b-5p	CCDC25	55246
hsa-miR-181b-5p	CCDC42	146849
hsa-miR-181b-5p	CCDC62	84660
hsa-miR-181b-5p	CCDC88C	440193
hsa-miR-181b-5p	CCNDBP1	23582
hsa-miR-181b-5p	CCNJ	54619
hsa-miR-181b-5p	CCSAP	126731
hsa-miR-181b-5p	CD302	9936
hsa-miR-181b-5p	CD48	962
hsa-miR-181b-5p	CDC14B	8555
hsa-miR-181b-5p	CDC42BPA	8476
hsa-miR-181b-5p	CDKN2AIP	55602
hsa-miR-181b-5p	CDX2	1045
hsa-miR-181b-5p	CEBPG	1054
hsa-miR-181b-5p	CEP120	153241
hsa-miR-181b-5p	CERS3	204219
hsa-miR-181b-5p	CETN3	1070
hsa-miR-181b-5p	CHCHD7	79145
hsa-miR-181b-5p	CHMP1B	57132
hsa-miR-181b-5p	CHMP2B	25978
hsa-miR-181b-5p	CLDN8	9073
hsa-miR-181b-5p	CLIP1	6249
hsa-miR-181b-5p	CLMN	79789
hsa-miR-181b-5p	CLVS1	157807
hsa-miR-181b-5p	CNNM2	54805
hsa-miR-181b-5p	CNOT2	4848
hsa-miR-181b-5p	CNOT6L	246175
hsa-miR-181b-5p	CNR1	1268
hsa-miR-181b-5p	COL19A1	1310
hsa-miR-181b-5p	COPS2	9318
hsa-miR-181b-5p	COQ2	27235
hsa-miR-181b-5p	CPD	1362
hsa-miR-181b-5p	CPEB4	80315
hsa-miR-181b-5p	CPOX	1371
hsa-miR-181b-5p	CPSF6	11052
hsa-miR-181b-5p	CREB1	1385
hsa-miR-181b-5p	CREB5	9586
hsa-miR-181b-5p	CREBRF	153222
hsa-miR-181b-5p	CREBZF	58487
hsa-miR-181b-5p	CSF2RB	1439
hsa-miR-181b-5p	CTDSPL	10217
hsa-miR-181b-5p	CTNNA1	1495
hsa-miR-181b-5p	CTTNBP2NL	55917
hsa-miR-181b-5p	CTXN2	399697
hsa-miR-181b-5p	CUL3	8452
hsa-miR-181b-5p	CXCL1	2919
hsa-miR-181b-5p	CXorf23	256643
hsa-miR-181b-5p	CYB561D1	284613
hsa-miR-181b-5p	CYLD	1540
hsa-miR-181b-5p	CYR61	3491
hsa-miR-181b-5p	DARS	1615
hsa-miR-181b-5p	DAZAP2	9802
hsa-miR-181b-5p	DCLK1	9201
hsa-miR-181b-5p	DCLK3	85443
hsa-miR-181b-5p	DCUN1D5	84259
hsa-miR-181b-5p	DDX3X	1654
hsa-miR-181b-5p	DDX3Y	8653
hsa-miR-181b-5p	DDX52	11056
hsa-miR-181b-5p	DDX60L	91351
hsa-miR-181b-5p	DEPTOR	64798
hsa-miR-181b-5p	DGKH	160851
hsa-miR-181b-5p	DIP2C	22982
hsa-miR-181b-5p	DIRAS3	9077
hsa-miR-181b-5p	DLGAP2	9228
hsa-miR-181b-5p	DMGDH	29958
hsa-miR-181b-5p	DNAH8	1769
hsa-miR-181b-5p	DOCK10	55619
hsa-miR-181b-5p	DOCK7	85440
hsa-miR-181b-5p	DPYSL2	1808
hsa-miR-181b-5p	DSC3	1825
hsa-miR-181b-5p	DYNC1LI2	1783
hsa-miR-181b-5p	DYNC2H1	79659
hsa-miR-181b-5p	E2F1	1869
hsa-miR-181b-5p	E2F5	1875
hsa-miR-181b-5p	E2F7	144455
hsa-miR-181b-5p	EHF	26298
hsa-miR-181b-5p	EIF4A2	1974
hsa-miR-181b-5p	ELAVL2	1993
hsa-miR-181b-5p	ELAVL4	1996
hsa-miR-181b-5p	ELMSAN1	91748
hsa-miR-181b-5p	ELN	2006
hsa-miR-181b-5p	EMB	133418
hsa-miR-181b-5p	EN2	2020
hsa-miR-181b-5p	ENAH	55740
hsa-miR-181b-5p	ENDOD1	23052
hsa-miR-181b-5p	ENPP1	5167
hsa-miR-181b-5p	EPC2	26122
hsa-miR-181b-5p	ERAP2	64167
hsa-miR-181b-5p	EREG	2069
hsa-miR-181b-5p	ERI1	90459
hsa-miR-181b-5p	ERMAP	114625
hsa-miR-181b-5p	ESCO2	157570
hsa-miR-181b-5p	ETV6	2120
hsa-miR-181b-5p	EXD1	161829
hsa-miR-181b-5p	EYS	346007
hsa-miR-181b-5p	F5	2153
hsa-miR-181b-5p	FAM105B	90268
hsa-miR-181b-5p	FAM13B	51306
hsa-miR-181b-5p	FAM160A2	84067
hsa-miR-181b-5p	FAM178A	55719
hsa-miR-181b-5p	FAM179B	23116
hsa-miR-181b-5p	FAM3C	10447
hsa-miR-181b-5p	FAN1	22909
hsa-miR-181b-5p	FANCM	57697
hsa-miR-181b-5p	FAT3	120114
hsa-miR-181b-5p	FBXL17	64839
hsa-miR-181b-5p	FBXL3	26224
hsa-miR-181b-5p	FBXO33	254170
hsa-miR-181b-5p	FBXO34	55030
hsa-miR-181b-5p	FBXO45	200933
hsa-miR-181b-5p	FIGN	55137
hsa-miR-181b-5p	FKBP1A	2280
hsa-miR-181b-5p	FLVCR1	28982
hsa-miR-181b-5p	FMNL2	114793
hsa-miR-181b-5p	FNDC3A	22862
hsa-miR-181b-5p	FNDC3B	64778
hsa-miR-181b-5p	FOS	2353
hsa-miR-181b-5p	FOXK1	221937
hsa-miR-181b-5p	FOXP1	27086
hsa-miR-181b-5p	FRMD7	90167
hsa-miR-181b-5p	FUCA1	2517
hsa-miR-181b-5p	FUT1	2523
hsa-miR-181b-5p	FUT9	10690
hsa-miR-181b-5p	FZD3	7976
hsa-miR-181b-5p	GAB1	2549
hsa-miR-181b-5p	GABRA1	2554
hsa-miR-181b-5p	GABRA4	2557
hsa-miR-181b-5p	GALNT4	8693
hsa-miR-181b-5p	GAPT	202309
hsa-miR-181b-5p	GATA6	2627
hsa-miR-181b-5p	GATM	2628
hsa-miR-181b-5p	GDA	9615
hsa-miR-181b-5p	GFPT1	2673
hsa-miR-181b-5p	GGCT	79017
hsa-miR-181b-5p	GHITM	27069
hsa-miR-181b-5p	GID4	79018
hsa-miR-181b-5p	GIMAP1	170575
hsa-miR-181b-5p	GLDN	342035
hsa-miR-181b-5p	GLRX	2745
hsa-miR-181b-5p	GNA12	2768
hsa-miR-181b-5p	GNB4	59345
hsa-miR-181b-5p	GOLGA6C	653641
hsa-miR-181b-5p	GOLGA6L10	647042
hsa-miR-181b-5p	GP5	2814
hsa-miR-181b-5p	GPATCH11	253635
hsa-miR-181b-5p	GPBP1	65056
hsa-miR-181b-5p	GPCPD1	56261
hsa-miR-181b-5p	GPR137C	283554
hsa-miR-181b-5p	GPR26	2849
hsa-miR-181b-5p	GPX8	493869
hsa-miR-181b-5p	GRB10	2887
hsa-miR-181b-5p	GREM1	26585
hsa-miR-181b-5p	GRIA2	2891
hsa-miR-181b-5p	GRIN2A	2903
hsa-miR-181b-5p	GRM5	2915
hsa-miR-181b-5p	GSE1	23199
hsa-miR-181b-5p	GSKIP	51527
hsa-miR-181b-5p	GSTCD	79807
hsa-miR-181b-5p	GTF2H5	404672
hsa-miR-181b-5p	GTPBP10	85865
hsa-miR-181b-5p	H2AFV	94239
hsa-miR-181b-5p	HAUS3	79441
hsa-miR-181b-5p	HCN1	348980
hsa-miR-181b-5p	HECA	51696
hsa-miR-181b-5p	HEPHL1	341208
hsa-miR-181b-5p	HEY2	23493
hsa-miR-181b-5p	HIC2	23119
hsa-miR-181b-5p	HK2	3099
hsa-miR-181b-5p	HLF	3131
hsa-miR-181b-5p	HMGB1	3146
hsa-miR-181b-5p	HMGB2	3148
hsa-miR-181b-5p	HOOK1	51361
hsa-miR-181b-5p	HOOK3	84376
hsa-miR-181b-5p	HOXA1	3198
hsa-miR-181b-5p	HOXB4	3214
hsa-miR-181b-5p	HOXD1	3231
hsa-miR-181b-5p	HS6ST3	266722
hsa-miR-181b-5p	HSP90B1	7184
hsa-miR-181b-5p	IFT74	80173
hsa-miR-181b-5p	IFT81	28981
hsa-miR-181b-5p	IGF1R	3480
hsa-miR-181b-5p	IGSF11	152404
hsa-miR-181b-5p	IL1A	3552
hsa-miR-181b-5p	IL2	3558
hsa-miR-181b-5p	INO80D	54891
hsa-miR-181b-5p	INPP4A	3631
hsa-miR-181b-5p	IPMK	253430
hsa-miR-181b-5p	IPO5	3843
hsa-miR-181b-5p	IPO7	10527
hsa-miR-181b-5p	IRF5	3663
hsa-miR-181b-5p	IRS2	8660
hsa-miR-181b-5p	ITGA2	3673
hsa-miR-181b-5p	ITGB8	3696
hsa-miR-181b-5p	ITSN1	6453
hsa-miR-181b-5p	JAZF1	221895
hsa-miR-181b-5p	KAT2B	8850
hsa-miR-181b-5p	KATNBL1	79768
hsa-miR-181b-5p	KCNA4	3739
hsa-miR-181b-5p	KCNH1	3756
hsa-miR-181b-5p	KCNH8	131096
hsa-miR-181b-5p	KCNK10	54207
hsa-miR-181b-5p	KCNMB2	10242
hsa-miR-181b-5p	KCNN3	3782
hsa-miR-181b-5p	KCNQ5	56479
hsa-miR-181b-5p	KCTD3	51133
hsa-miR-181b-5p	KDM5A	5927
hsa-miR-181b-5p	KIAA0195	9772
hsa-miR-181b-5p	KIAA0247	9766
hsa-miR-181b-5p	KIAA0825	285600
hsa-miR-181b-5p	KIAA1239	57495
hsa-miR-181b-5p	KIAA1244	57221
hsa-miR-181b-5p	KIAA1324L	222223
hsa-miR-181b-5p	KIAA1549L	25758
hsa-miR-181b-5p	KIF3A	11127
hsa-miR-181b-5p	KIF3B	9371
hsa-miR-181b-5p	KITLG	4254
hsa-miR-181b-5p	KL	9365
hsa-miR-181b-5p	KLF3	51274
hsa-miR-181b-5p	KLF6	1316
hsa-miR-181b-5p	KLHL2	11275
hsa-miR-181b-5p	KLHL42	57542
hsa-miR-181b-5p	KLHL5	51088
hsa-miR-181b-5p	KMT2A	4297
hsa-miR-181b-5p	KMT2E	55904
hsa-miR-181b-5p	KPNA4	3840
hsa-miR-181b-5p	KPNB1	3837
hsa-miR-181b-5p	KRAS	3845
hsa-miR-181b-5p	KRBOX4	55634
hsa-miR-181b-5p	LAMP2	3920
hsa-miR-181b-5p	LARP4	113251
hsa-miR-181b-5p	LATS2	26524
hsa-miR-181b-5p	LCOR	84458
hsa-miR-181b-5p	LCTL	197021
hsa-miR-181b-5p	LEKR1	389170
hsa-miR-181b-5p	LEMD3	23592
hsa-miR-181b-5p	LEPROT	54741
hsa-miR-181b-5p	LHFPL3	375612
hsa-miR-181b-5p	LIFR	3977
hsa-miR-181b-5p	LIN28A	79727
hsa-miR-181b-5p	LIN28B	389421
hsa-miR-181b-5p	LMAN1	3998
hsa-miR-181b-5p	LMO3	55885
hsa-miR-181b-5p	LOC100653247	100653247
hsa-miR-181b-5p	LONRF1	91694
hsa-miR-181b-5p	LOX	4015
hsa-miR-181b-5p	LPCAT2	54947
hsa-miR-181b-5p	LPP	4026
hsa-miR-181b-5p	LRRC8D	55144
hsa-miR-181b-5p	LRRN1	57633
hsa-miR-181b-5p	LY75-CD302	100526664
hsa-miR-181b-5p	MAB21L3	126868
hsa-miR-181b-5p	MAMDC2	256691
hsa-miR-181b-5p	MAP1B	4131
hsa-miR-181b-5p	MAP2K1	5604
hsa-miR-181b-5p	MAP2K4	6416
hsa-miR-181b-5p	MAP3K10	4294
hsa-miR-181b-5p	MAP3K3	4215
hsa-miR-181b-5p	MAPK1	5594
hsa-miR-181b-5p	MAPK1IP1L	93487
hsa-miR-181b-5p	MARC2	54996
hsa-miR-181b-5p	MASP1	5648
hsa-miR-181b-5p	MAT2A	4144
hsa-miR-181b-5p	MBLAC2	153364
hsa-miR-181b-5p	MBNL1	4154
hsa-miR-181b-5p	MBNL2	10150
hsa-miR-181b-5p	MBOAT2	129642
hsa-miR-181b-5p	MCL1	4170
hsa-miR-181b-5p	MCTP2	55784
hsa-miR-181b-5p	MCTS1	28985
hsa-miR-181b-5p	MCUR1	63933
hsa-miR-181b-5p	MDH1B	130752
hsa-miR-181b-5p	MDM4	4194
hsa-miR-181b-5p	MED12L	116931
hsa-miR-181b-5p	MED8	112950
hsa-miR-181b-5p	MEG3	55384
hsa-miR-181b-5p	MEGF10	84466
hsa-miR-181b-5p	MEGF9	1955
hsa-miR-181b-5p	METAP1	23173
hsa-miR-181b-5p	METAP2	10988
hsa-miR-181b-5p	METTL20	254013
hsa-miR-181b-5p	MFSD6	54842
hsa-miR-181b-5p	MFSD8	256471
hsa-miR-181b-5p	MGAT5	4249
hsa-miR-181b-5p	MIA2	117153
hsa-miR-181b-5p	MICU3	286097
hsa-miR-181b-5p	MID2	11043
hsa-miR-181b-5p	MINA	84864
hsa-miR-181b-5p	MIP	4284
hsa-miR-181b-5p	MKLN1	4289
hsa-miR-181b-5p	MME	4311
hsa-miR-181b-5p	MOSPD1	56180
hsa-miR-181b-5p	MPP7	143098
hsa-miR-181b-5p	MRPL13	28998
hsa-miR-181b-5p	MTF2	22823
hsa-miR-181b-5p	MTX3	345778
hsa-miR-181b-5p	MUC7	4589
hsa-miR-181b-5p	MYBL1	4603
hsa-miR-181b-5p	MYH15	22989
hsa-miR-181b-5p	MYO1E	4643
hsa-miR-181b-5p	MYSM1	114803
hsa-miR-181b-5p	NAALADL2	254827
hsa-miR-181b-5p	NAP1L1	4673
hsa-miR-181b-5p	NARG2	79664
hsa-miR-181b-5p	NDC1	55706
hsa-miR-181b-5p	NDRG4	65009
hsa-miR-181b-5p	NEK7	140609
hsa-miR-181b-5p	NELFA	7469
hsa-miR-181b-5p	NFAT5	10725
hsa-miR-181b-5p	NFIA	4774
hsa-miR-181b-5p	NFIB	4781
hsa-miR-181b-5p	NFYB	4801
hsa-miR-181b-5p	NLK	51701
hsa-miR-181b-5p	NLN	57486
hsa-miR-181b-5p	NMT2	9397
hsa-miR-181b-5p	NOTCH4	4855
hsa-miR-181b-5p	NOVA1	4857
hsa-miR-181b-5p	NPAP1	23742
hsa-miR-181b-5p	NPTXR	23467
hsa-miR-181b-5p	NR1D2	9975
hsa-miR-181b-5p	NR2C2	7182
hsa-miR-181b-5p	NR3C1	2908
hsa-miR-181b-5p	NR4A3	8013
hsa-miR-181b-5p	NRAS	4893
hsa-miR-181b-5p	NRXN1	9378
hsa-miR-181b-5p	NTS	4922
hsa-miR-181b-5p	NUCKS1	64710
hsa-miR-181b-5p	NUDT12	83594
hsa-miR-181b-5p	NUDT21	11051
hsa-miR-181b-5p	NUDT4	11163
hsa-miR-181b-5p	NUFIP1	26747
hsa-miR-181b-5p	NUFIP2	57532
hsa-miR-181b-5p	OCIAD1	54940
hsa-miR-181b-5p	OGFRL1	79627
hsa-miR-181b-5p	ONECUT2	9480
hsa-miR-181b-5p	OSBPL2	9885
hsa-miR-181b-5p	OSBPL3	26031
hsa-miR-181b-5p	OSBPL8	114882
hsa-miR-181b-5p	OTUD4	54726
hsa-miR-181b-5p	PABPC5	140886
hsa-miR-181b-5p	PAFAH1B2	5049
hsa-miR-181b-5p	PAG1	55824
hsa-miR-181b-5p	PALM2	114299
hsa-miR-181b-5p	PAM	5066
hsa-miR-181b-5p	PAPD5	64282
hsa-miR-181b-5p	PAPOLG	64895
hsa-miR-181b-5p	PARK2	5071
hsa-miR-181b-5p	PARM1	25849
hsa-miR-181b-5p	PARP11	57097
hsa-miR-181b-5p	PAWR	5074
hsa-miR-181b-5p	PAX6	5080
hsa-miR-181b-5p	PAX9	5083
hsa-miR-181b-5p	PAXBP1	94104
hsa-miR-181b-5p	PBX1	5087
hsa-miR-181b-5p	PBX3	5090
hsa-miR-181b-5p	PCDH11Y	83259
hsa-miR-181b-5p	PCDH15	65217
hsa-miR-181b-5p	PCDHA1	56147
hsa-miR-181b-5p	PCDHA10	56139
hsa-miR-181b-5p	PCDHA11	56138
hsa-miR-181b-5p	PCDHA12	56137
hsa-miR-181b-5p	PCDHA13	56136
hsa-miR-181b-5p	PCDHA2	56146
hsa-miR-181b-5p	PCDHA3	56145
hsa-miR-181b-5p	PCDHA4	56144
hsa-miR-181b-5p	PCDHA5	56143
hsa-miR-181b-5p	PCDHA6	56142
hsa-miR-181b-5p	PCDHA7	56141
hsa-miR-181b-5p	PCDHA8	56140
hsa-miR-181b-5p	PCDHA9	9752
hsa-miR-181b-5p	PCDHAC1	56135
hsa-miR-181b-5p	PCDHAC2	56134
hsa-miR-181b-5p	PCNXL4	64430
hsa-miR-181b-5p	PCSK1	5122
hsa-miR-181b-5p	PDAP1	11333
hsa-miR-181b-5p	PDCD10	11235
hsa-miR-181b-5p	PDCD4	27250
hsa-miR-181b-5p	PDE5A	8654
hsa-miR-181b-5p	PDGFRA	5156
hsa-miR-181b-5p	PEAK1	79834
hsa-miR-181b-5p	PER3	8863
hsa-miR-181b-5p	PEX13	5194
hsa-miR-181b-5p	PGAP1	80055
hsa-miR-181b-5p	PGPEP1L	145814
hsa-miR-181b-5p	PGR	5241
hsa-miR-181b-5p	PHACTR2	9749
hsa-miR-181b-5p	PHC3	80012
hsa-miR-181b-5p	PHF20L1	51105
hsa-miR-181b-5p	PHLPP2	23035
hsa-miR-181b-5p	PI4K2B	55300
hsa-miR-181b-5p	PIK3C2A	5286
hsa-miR-181b-5p	PITPNB	23760
hsa-miR-181b-5p	PKD2	5311
hsa-miR-181b-5p	PKNOX1	5316
hsa-miR-181b-5p	PKNOX2	63876
hsa-miR-181b-5p	PKP2	5318
hsa-miR-181b-5p	PLA2G4C	8605
hsa-miR-181b-5p	PLAG1	5324
hsa-miR-181b-5p	PLAU	5328
hsa-miR-181b-5p	PLD1	5337
hsa-miR-181b-5p	PLEKHA1	59338
hsa-miR-181b-5p	PLEKHA3	65977
hsa-miR-181b-5p	PLEKHA8	84725
hsa-miR-181b-5p	PLG	5340
hsa-miR-181b-5p	PLSCR5	389158
hsa-miR-181b-5p	PMAIP1	5366
hsa-miR-181b-5p	POC1B-GALNT4	100528030
hsa-miR-181b-5p	POLI	11201
hsa-miR-181b-5p	POLQ	10721
hsa-miR-181b-5p	POLR3G	10622
hsa-miR-181b-5p	POMC	5443
hsa-miR-181b-5p	POU2F1	5451
hsa-miR-181b-5p	PPARA	5465
hsa-miR-181b-5p	PPFIA1	8500
hsa-miR-181b-5p	PPP1R12B	4660
hsa-miR-181b-5p	PPP1R17	10842
hsa-miR-181b-5p	PPP1R3B	79660
hsa-miR-181b-5p	PPP1R3C	5507
hsa-miR-181b-5p	PPP1R3D	5509
hsa-miR-181b-5p	PPP1R9A	55607
hsa-miR-181b-5p	PPP2R5E	5529
hsa-miR-181b-5p	PPP3R1	5534
hsa-miR-181b-5p	PRDM4	11108
hsa-miR-181b-5p	PRDX3	10935
hsa-miR-181b-5p	PRH2	5555
hsa-miR-181b-5p	PRKG1	5592
hsa-miR-181b-5p	PRLR	5618
hsa-miR-181b-5p	PROCR	10544
hsa-miR-181b-5p	PROSER1	80209
hsa-miR-181b-5p	PRR20A	122183
hsa-miR-181b-5p	PRR20B	729233
hsa-miR-181b-5p	PRR20C	729240
hsa-miR-181b-5p	PRR20D	729246
hsa-miR-181b-5p	PRR20E	729250
hsa-miR-181b-5p	PRRC1	133619
hsa-miR-181b-5p	PRRC2C	23215
hsa-miR-181b-5p	PRRG4	79056
hsa-miR-181b-5p	PRSS16	10279
hsa-miR-181b-5p	PRTG	283659
hsa-miR-181b-5p	PSG11	5680
hsa-miR-181b-5p	PSG3	5671
hsa-miR-181b-5p	PSG5	5673
hsa-miR-181b-5p	PSG9	5678
hsa-miR-181b-5p	PTBP3	9991
hsa-miR-181b-5p	PTEN	5728
hsa-miR-181b-5p	PTGER3	5733
hsa-miR-181b-5p	PTGS2	5743
hsa-miR-181b-5p	PTPN9	5780
hsa-miR-181b-5p	PTPRB	5787
hsa-miR-181b-5p	PURB	5814
hsa-miR-181b-5p	RAB11A	8766
hsa-miR-181b-5p	RAB27B	5874
hsa-miR-181b-5p	RAB3IP	117177
hsa-miR-181b-5p	RAB40B	10966
hsa-miR-181b-5p	RABGEF1	27342
hsa-miR-181b-5p	RAD21	5885
hsa-miR-181b-5p	RAP1B	5908
hsa-miR-181b-5p	RAP2A	5911
hsa-miR-181b-5p	RASSF1	11186
hsa-miR-181b-5p	RASSF2	9770
hsa-miR-181b-5p	RASSF6	166824
hsa-miR-181b-5p	RASSF8	11228
hsa-miR-181b-5p	RBBP7	5931
hsa-miR-181b-5p	RBM26	64062
[truncated: 3,845 more rows]

## Sheet:  Green
miRNA	Target Gene	EntrezID
hsa-let-7i-3p	BDNF	627
hsa-let-7i-3p	MOG	4340
hsa-let-7i-3p	STAG2	10735
hsa-let-7i-3p	SIX1	6495
hsa-let-7i-3p	HNRNPUL2	221092
hsa-let-7i-3p	NCS1	23413
hsa-let-7i-3p	ACTB	60
hsa-let-7i-3p	HDGFRP3	50810
hsa-let-7i-3p	ZFYVE28	57732
hsa-let-7i-3p	XPNPEP3	63929
hsa-let-7i-3p	MYO5A	4644
hsa-let-7i-3p	OSBPL11	114885
hsa-miR-126-3p	PLXNB2	23654
hsa-miR-126-3p	SPRED1	161742
hsa-miR-126-3p	PLK2	10769
hsa-miR-126-3p	RGS3	5998
hsa-miR-126-3p	TOM1	10043
hsa-miR-126-3p	HOXA9	3205
hsa-miR-126-3p	CRK	1398
hsa-miR-126-3p	VEGFA	7422
hsa-miR-126-3p	PIK3R2	5296
hsa-miR-126-3p	VCAM1	7412
hsa-miR-126-3p	IRS1	3667
hsa-miR-126-3p	SOX2	6657
hsa-miR-126-3p	PTPN7	5778
hsa-miR-126-3p	DNMT1	1786
hsa-miR-126-3p	KRAS	3845
hsa-miR-126-3p	IGFBP2	3485
hsa-miR-126-3p	PITPNC1	26207
hsa-miR-126-3p	MERTK	10461
hsa-miR-126-3p	EGFL7	51162
hsa-miR-126-3p	SLC7A5	8140
hsa-miR-126-3p	PIK3CG	5294
hsa-miR-126-3p	TEK	7010
hsa-miR-126-3p	ADAM9	8754
hsa-miR-126-3p	MMP7	4316
hsa-miR-126-3p	CXCL12	6387
hsa-miR-126-3p	CRKL	1399
hsa-miR-126-3p	PGR	5241
hsa-miR-126-3p	FOXO3	2309
hsa-miR-126-3p	BCL2	596
hsa-miR-126-3p	CXCR4	7852
hsa-miR-126-3p	ADGRE5	976
hsa-miR-126-3p	TCF4	6925
hsa-miR-126-3p	RHOU	58480
hsa-miR-126-3p	LRP6	4040
hsa-miR-126-3p	ADM	133
hsa-miR-126-3p	SIRT1	23411
hsa-miR-126-3p	NFKBIA	4792
hsa-miR-126-3p	CADM1	23705
hsa-miR-126-3p	EZH2	2146
hsa-miR-126-3p	ROCK1	6093
hsa-miR-126-3p	AKT1	207
hsa-miR-16-5p	AGPAT6	137964
hsa-miR-16-5p	ACVR2A	92
hsa-miR-16-5p	EXT2	2132
hsa-miR-16-5p	QKI	9444
hsa-miR-16-5p	CCDC19	25790
hsa-miR-16-5p	LRP6	4040
hsa-miR-16-5p	KCNK10	54207
hsa-miR-16-5p	SOCS6	9306
hsa-miR-16-5p	ZFP91	80829
hsa-miR-16-5p	PTHLH	5744
hsa-miR-16-5p	ZFHX4	79776
hsa-miR-16-5p	UNC80	285175
hsa-miR-16-5p	RUNX1T1	862
hsa-miR-16-5p	LHX3	8022
hsa-miR-16-5p	SMAD7	4092
hsa-miR-16-5p	YAP1	10413
hsa-miR-16-5p	RAD23B	5887
hsa-miR-16-5p	KIAA1432	57589
hsa-miR-16-5p	PDK3	5165
hsa-miR-16-5p	USP25	29761
hsa-miR-16-5p	UHMK1	127933
hsa-miR-16-5p	SIAH1	6477
hsa-miR-16-5p	CNOT6L	246175
hsa-miR-16-5p	CLCN5	1184
hsa-miR-16-5p	SRP72	6731
hsa-miR-16-5p	TRPC1	7220
hsa-miR-16-5p	ZSCAN31	64288
hsa-miR-16-5p	PIK3R1	5295
hsa-miR-16-5p	PTCD3	55037
hsa-miR-16-5p	SRPR	6734
hsa-miR-16-5p	SLC35G1	159371
hsa-miR-16-5p	BDNF	627
hsa-miR-16-5p	GHR	2690
hsa-miR-16-5p	TLK1	9874
hsa-miR-16-5p	WIPI2	26100
hsa-miR-16-5p	PAFAH1B2	5049
hsa-miR-16-5p	KIF21A	55605
hsa-miR-16-5p	NOS1	4842
hsa-miR-16-5p	NEBL	10529
hsa-miR-16-5p	SYDE2	84144
hsa-miR-16-5p	PTPRD	5789
hsa-miR-16-5p	ZNF622	90441
hsa-miR-16-5p	OOEP	441161
hsa-miR-16-5p	CASK	8573
hsa-miR-16-5p	MYO5A	4644
hsa-miR-16-5p	NUP50	10762
hsa-miR-16-5p	ENTPD1	953
hsa-miR-16-5p	SYNJ1	8867
hsa-miR-16-5p	TNRC6B	23112
hsa-miR-16-5p	RNF138	51444
hsa-miR-16-5p	CDC14B	8555
hsa-miR-16-5p	HAUS3	79441
hsa-miR-16-5p	PRKAR2A	5576
hsa-miR-16-5p	CDC42SE2	56990
hsa-miR-16-5p	THRB	7068
hsa-miR-16-5p	CYB561A3	220002
hsa-miR-16-5p	UMOD	7369
hsa-miR-16-5p	HTR4	3360
hsa-miR-16-5p	PPIF	10105
hsa-miR-16-5p	POU2F1	5451
hsa-miR-16-5p	PLSCR4	57088
hsa-miR-16-5p	ORC4	5000
hsa-miR-16-5p	ACSBG1	23205
hsa-miR-16-5p	BTBD9	114781
hsa-miR-16-5p	RORA	6095
hsa-miR-16-5p	C14orf37	145407
hsa-miR-16-5p	SLC1A2	6506
hsa-miR-16-5p	AQP11	282679
hsa-miR-16-5p	LYRM5	144363
hsa-miR-16-5p	ACVR2B	93
hsa-miR-16-5p	MOB4	25843
hsa-miR-16-5p	CAPRIN1	4076
hsa-miR-16-5p	TREM1	54210
hsa-miR-16-5p	MED26	9441
hsa-miR-16-5p	GPR63	81491
hsa-miR-16-5p	TMC7	79905
hsa-miR-16-5p	ACOX1	51
hsa-miR-16-5p	RET	5979
hsa-miR-16-5p	PDYN	5173
hsa-miR-16-5p	TFCP2L1	29842
hsa-miR-16-5p	DYNC1LI2	1783
hsa-miR-16-5p	WEE1	7465
hsa-miR-16-5p	PLAG1	5324
hsa-miR-16-5p	TMEM100	55273
hsa-miR-16-5p	SYPL1	6856
hsa-miR-16-5p	PAPPA	5069
hsa-miR-16-5p	POLR3F	10621
hsa-miR-16-5p	DIXDC1	85458
hsa-miR-16-5p	TMEM55B	90809
hsa-miR-16-5p	ZNF704	619279
hsa-miR-16-5p	PPAP2A	8611
hsa-miR-16-5p	MYO5B	4645
hsa-miR-16-5p	CPSF6	11052
hsa-miR-16-5p	CDC25A	993
hsa-miR-16-5p	MTMR3	8897
hsa-miR-16-5p	GNAT1	2779
hsa-miR-16-5p	MKNK1	8569
hsa-miR-16-5p	NLRX1	79671
hsa-miR-16-5p	PRRG1	5638
hsa-miR-16-5p	SMURF1	57154
hsa-miR-16-5p	ATXN7L1	222255
hsa-miR-16-5p	RBM12	10137
hsa-miR-16-5p	PPP6C	5537
hsa-miR-16-5p	CNTN3	5067
hsa-miR-16-5p	WWC1	23286
hsa-miR-16-5p	RPS6KA3	6197
hsa-miR-16-5p	BTLA	151888
hsa-miR-16-5p	UBR3	130507
hsa-miR-16-5p	SLC16A1	6566
hsa-miR-16-5p	GLT1D1	144423
hsa-miR-16-5p	ARHGAP5	394
hsa-miR-16-5p	EYA1	2138
hsa-miR-16-5p	KIF23	9493
hsa-miR-16-5p	FAM63B	54629
hsa-miR-16-5p	ADAMTS3	9508
hsa-miR-16-5p	GSG1	83445
hsa-miR-16-5p	PTPN3	5774
hsa-miR-16-5p	TSEN2	80746
hsa-miR-16-5p	ZDHHC21	340481
hsa-miR-16-5p	RECK	8434
hsa-miR-16-5p	MOCS1	4337
hsa-miR-16-5p	ARL3	403
hsa-miR-16-5p	PLEKHA1	59338
hsa-miR-16-5p	NRBP1	29959
hsa-miR-16-5p	DVL3	1857
hsa-miR-16-5p	SSR1	6745
hsa-miR-16-5p	YWHAH	7533
hsa-miR-16-5p	ZMAT3	64393
hsa-miR-16-5p	FBXW7	55294
hsa-miR-16-5p	TACC1	6867
hsa-miR-16-5p	FAM134C	162427
hsa-miR-16-5p	MFN2	9927
hsa-miR-16-5p	DIEXF	27042
hsa-miR-16-5p	PBX3	5090
hsa-miR-16-5p	SLC11A2	4891
hsa-miR-16-5p	RAB10	10890
hsa-miR-16-5p	PTPRR	5801
hsa-miR-16-5p	YTHDC1	91746
hsa-miR-16-5p	ZNF705D	728957
hsa-miR-16-5p	CCND3	896
hsa-miR-16-5p	CEACAM6	4680
hsa-miR-16-5p	ABHD2	11057
hsa-miR-16-5p	ZDHHC22	283576
hsa-miR-16-5p	LRCH1	23143
hsa-miR-16-5p	UBE2K	3093
hsa-miR-16-5p	CWC15	51503
hsa-miR-16-5p	NAPG	8774
hsa-miR-16-5p	USP31	57478
hsa-miR-16-5p	TK2	7084
hsa-miR-16-5p	IKBKB	3551
hsa-miR-16-5p	MAP2K1	5604
hsa-miR-16-5p	CD2AP	23607
hsa-miR-16-5p	RAB3IP	117177
hsa-miR-16-5p	RS1	6247
hsa-miR-16-5p	SNRNP48	154007
hsa-miR-16-5p	PSAT1	29968
hsa-miR-16-5p	CPEB2	132864
hsa-miR-16-5p	FAM81A	145773
hsa-miR-16-5p	MEOX2	4223
hsa-miR-16-5p	ZNHIT6	54680
hsa-miR-16-5p	DEPDC5	9681
hsa-miR-16-5p	EFCAB5	374786
hsa-miR-16-5p	CUL3	8452
hsa-miR-16-5p	MTHFR	4524
hsa-miR-16-5p	BCL2L2	599
hsa-miR-16-5p	SALL1	6299
hsa-miR-16-5p	STXBP3	6814
hsa-miR-16-5p	ZMYM2	7750
hsa-miR-16-5p	GAREM	64762
hsa-miR-16-5p	PLD1	5337
hsa-miR-16-5p	RFK	55312
hsa-miR-16-5p	ZNF780B	163131
hsa-miR-16-5p	VPS4A	27183
hsa-miR-16-5p	PCDH9	5101
hsa-miR-16-5p	FERMT1	55612
hsa-miR-16-5p	ZC3H12C	85463
hsa-miR-16-5p	NXPE3	91775
hsa-miR-16-5p	LOC100130451	100130451
hsa-miR-16-5p	JRK	8629
hsa-miR-16-5p	2018-09-02	4735
hsa-miR-16-5p	DNAJB4	11080
hsa-miR-16-5p	PRTG	283659
hsa-miR-16-5p	CHEK1	1111
hsa-miR-16-5p	BTRC	8945
hsa-miR-16-5p	HTR2A	3356
hsa-miR-16-5p	GSKIP	51527
hsa-miR-16-5p	CD84	8832
hsa-miR-16-5p	SEMA6D	80031
hsa-miR-16-5p	ZFYVE20	64145
hsa-miR-16-5p	UBN2	254048
hsa-miR-16-5p	CA2	760
hsa-miR-16-5p	XDH	7498
hsa-miR-16-5p	MASP1	5648
hsa-miR-16-5p	SLC39A10	57181
hsa-miR-16-5p	GABARAPL1	23710
hsa-miR-16-5p	RUNDC3B	154661
hsa-miR-16-5p	ST8SIA3	51046
hsa-miR-16-5p	SLC20A2	6575
hsa-miR-16-5p	ZNF548	147694
hsa-miR-16-5p	ATP5G3	518
hsa-miR-16-5p	SPAG7	9552
hsa-miR-16-5p	NSMF	26012
hsa-miR-16-5p	CNNM2	54805
hsa-miR-16-5p	N4BP1	9683
hsa-miR-16-5p	C1orf21	81563
hsa-miR-16-5p	TRABD2B	388630
hsa-miR-16-5p	CNTNAP1	8506
hsa-miR-16-5p	MYB	4602
hsa-miR-16-5p	SGK1	6446
hsa-miR-16-5p	SLC30A4	7782
hsa-miR-16-5p	IPPK	64768
hsa-miR-16-5p	ETNK1	55500
hsa-miR-16-5p	SLC30A8	169026
hsa-miR-16-5p	HELZ	9931
hsa-miR-16-5p	SESN1	27244
hsa-miR-16-5p	PCMT1	5110
hsa-miR-16-5p	BCAP29	55973
hsa-miR-16-5p	PRDM4	11108
hsa-miR-16-5p	SYS1	90196
hsa-miR-16-5p	HSPE1-MOB4	100529241
hsa-miR-16-5p	SLC4A4	8671
hsa-miR-16-5p	MGAT4A	11320
hsa-miR-16-5p	CYB561D1	284613
hsa-miR-16-5p	CLDN12	9069
hsa-miR-16-5p	PRRC2C	23215
hsa-miR-16-5p	IHH	3549
hsa-miR-16-5p	DPH5	51611
hsa-miR-16-5p	ZDHHC23	254887
hsa-miR-16-5p	CACNA1E	777
hsa-miR-16-5p	ZKSCAN8	7745
hsa-miR-16-5p	INSR	3643
hsa-miR-16-5p	RBM6	10180
hsa-miR-16-5p	PSMA5	5686
hsa-miR-16-5p	PCM1	5108
hsa-miR-16-5p	ATXN2	6311
hsa-miR-16-5p	CC2D1B	200014
hsa-miR-16-5p	CLSPN	63967
hsa-miR-16-5p	RAB9B	51209
hsa-miR-16-5p	SMPD1	6609
hsa-miR-16-5p	FECH	2235
hsa-miR-16-5p	CDCA4	55038
hsa-miR-16-5p	SH3BGRL2	83699
hsa-miR-16-5p	C8orf86	389649
hsa-miR-16-5p	CAPZA2	830
hsa-miR-16-5p	EZH1	2145
hsa-miR-16-5p	BTG2	7832
hsa-miR-16-5p	SLC13A3	64849
hsa-miR-16-5p	UBE2Q1	55585
hsa-miR-16-5p	TARBP2	6895
hsa-miR-16-5p	DMTF1	9988
hsa-miR-16-5p	PDK4	5166
hsa-miR-16-5p	AGPAT3	56894
hsa-miR-16-5p	TAF8	129685
hsa-miR-16-5p	RAB11FIP2	22841
hsa-miR-16-5p	SYT10	341359
hsa-miR-16-5p	RNF144B	255488
hsa-miR-16-5p	KCNJ2	3759
hsa-miR-16-5p	PTH	5741
hsa-miR-16-5p	TENM2	57451
hsa-miR-16-5p	SGCA	6442
hsa-miR-16-5p	KLHDC8B	200942
hsa-miR-16-5p	PHKA1	5255
hsa-miR-16-5p	SNCG	6623
hsa-miR-16-5p	FGF2	2247
hsa-miR-16-5p	NF2	4771
hsa-miR-16-5p	ZBTB39	9880
hsa-miR-16-5p	ZNRF3	84133
hsa-miR-16-5p	C12orf76	400073
hsa-miR-16-5p	PDLIM5	10611
hsa-miR-16-5p	FASN	2194
hsa-miR-16-5p	RPS6KA6	27330
hsa-miR-16-5p	CCDC6	8030
hsa-miR-16-5p	PPM1A	5494
hsa-miR-16-5p	PEX13	5194
hsa-miR-16-5p	ATF6	22926
hsa-miR-16-5p	AP1S3	130340
hsa-miR-16-5p	CPEB3	22849
hsa-miR-16-5p	NHLRC2	374354
hsa-miR-16-5p	DCLK1	9201
hsa-miR-16-5p	TMPRSS15	5651
hsa-miR-16-5p	WNK3	65267
hsa-miR-16-5p	KCNN4	3783
hsa-miR-16-5p	RNF41	10193
hsa-miR-16-5p	ODF2L	57489
hsa-miR-16-5p	LAMP3	27074
hsa-miR-16-5p	DENND6A	201627
hsa-miR-16-5p	CCNE1	898
hsa-miR-16-5p	SLC12A2	6558
hsa-miR-16-5p	SNRPB2	6629
hsa-miR-16-5p	RASGEF1B	153020
hsa-miR-16-5p	ATP7A	538
hsa-miR-16-5p	B4GALT1	2683
hsa-miR-16-5p	NFATC3	4775
hsa-miR-16-5p	DCUN1D5	84259
hsa-miR-16-5p	SLC25A53	401612
hsa-miR-16-5p	HIPK2	28996
hsa-miR-16-5p	SMARCA5	8467
hsa-miR-16-5p	CDC37L1	55664
hsa-miR-16-5p	STOX2	56977
hsa-miR-16-5p	XPO7	23039
hsa-miR-16-5p	RBBP6	5930
hsa-miR-16-5p	MPDZ	8777
hsa-miR-16-5p	ANKRD34C	390616
hsa-miR-16-5p	DDX3X	1654
hsa-miR-16-5p	SLC9A8	23315
hsa-miR-16-5p	IRAK2	3656
hsa-miR-16-5p	WBP11	51729
hsa-miR-16-5p	FCRL2	79368
hsa-miR-16-5p	TSC1	7248
hsa-miR-16-5p	CASR	846
hsa-miR-16-5p	KIF5A	3798
hsa-miR-16-5p	ATXN7L2	127002
hsa-miR-16-5p	SLC36A1	206358
hsa-miR-16-5p	SLC13A1	6561
hsa-miR-16-5p	TAF5	6877
hsa-miR-16-5p	RSBN1	54665
hsa-miR-16-5p	STXBP5	134957
hsa-miR-16-5p	IST1	9798
hsa-miR-16-5p	CBX2	84733
hsa-miR-16-5p	PPAPDC2	403313
hsa-miR-16-5p	TNFSF13B	10673
hsa-miR-16-5p	FGF9	2254
hsa-miR-16-5p	ZBTB44	29068
hsa-miR-16-5p	PPM1D	8493
hsa-miR-16-5p	ASH1L	55870
hsa-miR-16-5p	TGFBR3	7049
hsa-miR-16-5p	AKT3	10000
hsa-miR-16-5p	TRIM35	23087
hsa-miR-16-5p	LSM11	134353
hsa-miR-16-5p	ZC3H13	23091
hsa-miR-16-5p	VAPB	9217
hsa-miR-16-5p	SIRT4	23409
hsa-miR-16-5p	KIF5C	3800
hsa-miR-16-5p	YRDC	79693
hsa-miR-16-5p	LUZP1	7798
hsa-miR-16-5p	LY9	4063
hsa-miR-16-5p	PURA	5813
hsa-miR-16-5p	SIPA1L2	57568
hsa-miR-16-5p	DESI1	27351
hsa-miR-16-5p	LYPLAL1	127018
hsa-miR-16-5p	PPP1R11	6992
hsa-miR-16-5p	SON	6651
hsa-miR-16-5p	TRIM66	9866
hsa-miR-16-5p	ELAC1	55520
hsa-miR-16-5p	UBE4B	10277
hsa-miR-16-5p	SLC41A2	84102
hsa-miR-16-5p	RSPO3	84870
hsa-miR-16-5p	ZBTB34	403341
hsa-miR-16-5p	KIF1B	23095
hsa-miR-16-5p	KDSR	2531
hsa-miR-16-5p	CBX4	8535
hsa-miR-16-5p	TVP23C	201158
hsa-miR-16-5p	ACTR2	10097
hsa-miR-16-5p	FSTL4	23105
hsa-miR-16-5p	CACUL1	143384
hsa-miR-16-5p	PISD	23761
hsa-miR-16-5p	LAMC1	3915
hsa-miR-16-5p	TBL1XR1	79718
hsa-miR-16-5p	RAB3B	5865
hsa-miR-16-5p	ARHGAP20	57569
hsa-miR-16-5p	CDK17	5128
hsa-miR-16-5p	TEDDM1	127670
hsa-miR-16-5p	FOXK1	221937
hsa-miR-16-5p	CLCN4	1183
hsa-miR-16-5p	SNTB2	6645
hsa-miR-16-5p	SOS2	6655
hsa-miR-16-5p	ANKRD46	157567
hsa-miR-16-5p	AREL1	9870
hsa-miR-16-5p	PAFAH1B1	5048
hsa-miR-16-5p	TMEM55A	55529
hsa-miR-16-5p	IPO7	10527
hsa-miR-16-5p	SPRYD3	84926
hsa-miR-16-5p	ZNF705A	440077
hsa-miR-16-5p	GALNT1	2589
hsa-miR-16-5p	MRPS2	51116
hsa-miR-16-5p	BCAS1	8537
hsa-miR-16-5p	CYP26B1	56603
hsa-miR-16-5p	UBL3	5412
hsa-miR-16-5p	UBQLNL	143630
hsa-miR-16-5p	BMI1	648
hsa-miR-16-5p	HMGA1	3159
hsa-miR-16-5p	CDK6	1021
hsa-miR-16-5p	CCND1	595
hsa-miR-16-5p	PTGS2	5743
hsa-miR-16-5p	ARL2	402
hsa-miR-16-5p	ARHGDIA	396
hsa-miR-16-5p	BCL2	596
hsa-miR-16-5p	BRCA1	672
hsa-miR-16-5p	WNT3A	89780
hsa-miR-16-5p	CCND2	894
hsa-miR-16-5p	VEGFA	7422
hsa-miR-16-5p	CADM1	23705
hsa-miR-16-5p	TPPP3	51673
hsa-miR-16-5p	CHUK	1147
hsa-miR-16-5p	TP53	7157
hsa-miR-16-5p	ZYX	7791
hsa-miR-16-5p	NCOR2	9612
hsa-miR-16-5p	AXIN2	8313
hsa-miR-16-5p	KDR	3791
hsa-miR-16-5p	FGFR1	2260
hsa-miR-16-5p	HMGA2	8091
hsa-miR-16-5p	PIM1	5292
hsa-miR-16-5p	IFNG	3458
hsa-miR-16-5p	UNG	7374
hsa-miR-16-5p	RPS6KB1	6198
hsa-miR-16-5p	MTOR	2475
hsa-miR-16-5p	MAP7	9053
hsa-miR-16-5p	APP	351
hsa-miR-16-5p	CDS2	8760
hsa-miR-16-5p	SOX6	55553
hsa-miR-16-5p	IGF1R	3480
hsa-miR-16-5p	RAF1	5894
hsa-miR-16-5p	KRAS	3845
hsa-miR-16-5p	SLC6A4	6532
hsa-miR-16-5p	SOX5	6660
hsa-miR-16-5p	BIRC5	332
hsa-miR-16-5p	RICTOR	253260
hsa-miR-16-5p	HDGF	3068
hsa-miR-16-5p	WNT4	54361
hsa-miR-16-5p	BACE1	23621
hsa-miR-16-5p	NCSTN	23385
hsa-miR-16-5p	OPRM1	4988
hsa-miR-16-5p	IL12B	3593
hsa-miR-16-5p	ADORA2A	135
hsa-miR-16-5p	SOCS3	9021
hsa-miR-16-5p	HGF	3082
hsa-miR-16-5p	METTL13	51603
hsa-miR-16-5p	UCA1	652995
hsa-miR-16-5p	GLS2	27165
hsa-miR-16-5p	CLDN2	9075
hsa-miR-214-5p	AVPI1	60370
hsa-miR-214-5p	PIAS3	10401
hsa-miR-214-5p	KCTD7	154881
hsa-miR-214-5p	PRMT2	3275
hsa-miR-214-5p	ZNF562	54811
hsa-miR-214-5p	WDR35	57539
hsa-miR-214-5p	CEACAM1	634
hsa-miR-214-5p	RBFOX2	23543
hsa-miR-214-5p	ALS2CL	259173
hsa-miR-214-5p	CEACAM6	4680
hsa-miR-214-5p	PARK2	5071
hsa-miR-214-5p	ST3GAL1	6482
hsa-miR-214-5p	IQGAP1	8826
hsa-miR-214-5p	ZIC4	84107
hsa-miR-214-5p	DLG2	1740
hsa-miR-214-5p	BLOC1S6	26258
hsa-miR-214-5p	TVP23A	780776
hsa-miR-214-5p	XPNPEP3	63929
hsa-miR-214-5p	NCOA2	10499
hsa-miR-214-5p	HSF1	3297
hsa-miR-214-5p	CACNG8	59283
hsa-miR-214-5p	SLC46A3	283537
hsa-miR-214-5p	OVOL1	5017
hsa-miR-214-5p	SLC1A2	6506
hsa-miR-214-5p	TJP2	9414
hsa-miR-214-5p	EFCAB2	84288
hsa-miR-214-5p	DISC1	27185
hsa-miR-214-5p	C10orf76	79591
hsa-miR-214-5p	KLF12	11278
hsa-miR-214-5p	LONRF2	164832
hsa-miR-214-5p	IMPG1	3617
hsa-miR-214-5p	BHLHE41	79365
hsa-miR-214-5p	SLC25A34	284723
hsa-miR-214-5p	YEATS4	8089
hsa-miR-214-5p	FGF19	9965
hsa-miR-214-5p	CREB3L3	84699
hsa-miR-214-5p	EFNA1	1942
hsa-miR-214-5p	PPP1R3B	79660
hsa-miR-214-5p	PPM1E	22843
hsa-miR-214-5p	NLRC3	197358
hsa-miR-214-5p	ITGA3	3675
hsa-miR-214-5p	PIGX	54965
hsa-miR-214-5p	ARMC7	79637
hsa-miR-214-5p	BMP8A	353500
hsa-miR-214-5p	STK24	8428
hsa-miR-214-5p	SRP72	6731
hsa-miR-214-5p	SAE1	10055
hsa-miR-214-5p	AGBL1	123624
hsa-miR-214-5p	QTRTD1	79691
hsa-miR-214-5p	DZIP1	22873
hsa-miR-214-5p	TMEM201	199953
hsa-miR-214-5p	LYN	4067
hsa-miR-214-5p	FAM211A	388341
hsa-miR-214-5p	PDK3	5165
hsa-miR-214-5p	SLC43A1	8501
hsa-miR-214-5p	GALM	130589
hsa-miR-214-5p	EYA1	2138
hsa-miR-214-5p	GCNT4	51301
hsa-miR-214-5p	RWDD4	201965
hsa-miR-214-5p	LARP1B	55132
hsa-miR-214-5p	ST13	6767
hsa-miR-214-5p	ORAI2	80228
hsa-miR-214-5p	JAG1	182
hsa-miR-214-5p	PLP1	5354
hsa-miR-214-5p	KL	9365
hsa-miR-214-5p	EGFLAM	133584
hsa-miR-214-5p	LGSN	51557
hsa-miR-214-5p	C1QTNF2	114898
hsa-miR-214-5p	GGA2	23062
hsa-miR-214-5p	MAP7D2	256714
hsa-miR-214-5p	MXD1	4084
hsa-miR-214-5p	TMEM144	55314
hsa-miR-214-5p	TFDP1	7027
hsa-miR-214-5p	BPGM	669
hsa-miR-214-5p	GPSM1	26086
hsa-miR-214-5p	RGS7BP	401190
hsa-miR-214-5p	ARL4A	10124
hsa-miR-214-5p	ASB4	51666
hsa-miR-214-5p	IRGQ	126298
hsa-miR-214-5p	TNRC6B	23112
hsa-miR-214-5p	PLCXD1	55344
hsa-miR-214-5p	TPM3	7170
hsa-miR-214-5p	COL18A1	80781
hsa-miR-214-5p	CD1C	911
hsa-miR-214-5p	ZNF716	441234
hsa-miR-214-5p	CDH6	1004
hsa-miR-214-5p	NAA38	51691
hsa-miR-214-5p	TENM2	57451
hsa-miR-214-5p	OLFML2A	169611
hsa-miR-214-5p	ANKRD65	441869
hsa-miR-214-5p	GPR39	2863
hsa-miR-214-5p	PPL	5493
hsa-miR-214-5p	GPR173	54328
hsa-miR-214-5p	FECH	2235
hsa-miR-214-5p	BCL11A	53335
hsa-miR-214-5p	RGAG1	57529
hsa-miR-214-5p	MYH2	4620
hsa-miR-214-5p	TRAF3IP1	26146
hsa-miR-214-5p	ZNF704	619279
hsa-miR-214-5p	PREP	5550
hsa-miR-214-5p	VPS53	55275
hsa-miR-214-5p	SNAPC5	10302
hsa-miR-214-5p	AGPAT6	137964
hsa-miR-214-5p	LZTFL1	54585
hsa-miR-214-5p	SREK1IP1	285672
hsa-miR-214-5p	TNFRSF13B	23495
hsa-miR-214-5p	RPS23	6228
hsa-miR-214-5p	JRK	8629
hsa-miR-214-5p	CCR2	729230
hsa-miR-214-5p	KCNC4	3749
hsa-miR-214-5p	RASSF5	83593
hsa-miR-214-5p	E2F2	1870
hsa-miR-214-5p	CDK3	1018
hsa-miR-214-5p	CDK6	1021
hsa-miR-214-5p	IGF1R	3480
hsa-miR-214-5p	ITCH	83737
hsa-miR-214-5p	TP53	7157
hsa-miR-22-3p	TP53INP1	94241
hsa-miR-22-3p	PTGFR	5737
hsa-miR-22-3p	PMAIP1	5366
hsa-miR-22-3p	SYNE1	23345
hsa-miR-22-3p	SATB2	23314
hsa-miR-22-3p	ESR1	2099
hsa-miR-22-3p	CHST2	9435
hsa-miR-22-3p	ZDHHC16	84287
hsa-miR-22-3p	IL13RA1	3597
hsa-miR-22-3p	ZNF596	169270
hsa-miR-22-3p	CLIP2	7461
hsa-miR-22-3p	PLCXD3	345557
hsa-miR-22-3p	SLC7A2	6542
hsa-miR-22-3p	OTUD6B	51633
hsa-miR-22-3p	MSL2	55167
hsa-miR-22-3p	NR3C1	2908
hsa-miR-22-3p	ARPC5	10092
hsa-miR-22-3p	NTRK2	4915
hsa-miR-22-3p	CNKSR2	22866
hsa-miR-22-3p	STX6	10228
hsa-miR-22-3p	DTNA	1837
hsa-miR-22-3p	VEZF1	7716
hsa-miR-22-3p	GPBP1	65056
hsa-miR-22-3p	ELOVL6	79071
hsa-miR-22-3p	MEIS2	4212
hsa-miR-22-3p	FMNL2	114793
hsa-miR-22-3p	PTPN9	5780
hsa-miR-22-3p	ZNF618	114991
hsa-miR-22-3p	PRNP	5621
hsa-miR-22-3p	SLC24A2	25769
hsa-miR-22-3p	KAT6B	23522
hsa-miR-22-3p	BAG5	9529
hsa-miR-22-3p	LAMC1	3915
hsa-miR-22-3p	WARS2	10352
hsa-miR-22-3p	KCNAB1	7881
hsa-miR-22-3p	NCMAP	400746
hsa-miR-22-3p	STYX	6815
hsa-miR-22-3p	KCNK10	54207
hsa-miR-22-3p	LIN7C	55327
hsa-miR-22-3p	SEPHS1	22929
hsa-miR-22-3p	STAM2	10254
hsa-miR-22-3p	CAV3	859
hsa-miR-22-3p	CCNJL	79616
hsa-miR-22-3p	SLC24A4	123041
hsa-miR-22-3p	PURB	5814
hsa-miR-22-3p	NUS1	116150
hsa-miR-22-3p	GIGYF2	26058
hsa-miR-22-3p	MAT2A	4144
hsa-miR-22-3p	DGCR14	8220
hsa-miR-22-3p	C7orf73	647087
hsa-miR-22-3p	MAP3K7	6885
hsa-miR-22-3p	BATF3	55509
hsa-miR-22-3p	OGN	4969
hsa-miR-22-3p	VAT1	10493
hsa-miR-22-3p	CDX2	1045
hsa-miR-22-3p	SH3TC2	79628
hsa-miR-22-3p	RAB5B	5869
hsa-miR-22-3p	OLFM3	118427
hsa-miR-22-3p	SESN1	27244
hsa-miR-22-3p	KIAA0226	9711
hsa-miR-22-3p	ST6GAL2	84620
hsa-miR-22-3p	FUT9	10690
hsa-miR-22-3p	KIAA2018	205717
hsa-miR-22-3p	YARS	8565
hsa-miR-22-3p	ARSD	414
hsa-miR-22-3p	TET2	54790
hsa-miR-22-3p	SLC48A1	55652
hsa-miR-22-3p	GRM5	2915
hsa-miR-22-3p	OPRL1	4987
hsa-miR-22-3p	EFR3B	22979
hsa-miR-22-3p	IPO7	10527
hsa-miR-22-3p	TNFRSF10D	8793
hsa-miR-22-3p	TRAK2	66008
hsa-miR-22-3p	CHGA	1113
hsa-miR-22-3p	PPP1R3B	79660
hsa-miR-22-3p	RASGRF2	5924
hsa-miR-22-3p	PPARGC1B	133522
hsa-miR-22-3p	WDR91	29062
hsa-miR-22-3p	PHACTR2	9749
hsa-miR-22-3p	DPY30	84661
hsa-miR-22-3p	MOCS1	4337
hsa-miR-22-3p	TRIOBP	11078
hsa-miR-22-3p	RIMKLA	284716
hsa-miR-22-3p	DPM2	8818
hsa-miR-22-3p	BCL9	607
hsa-miR-22-3p	TRNAU1AP	54952
hsa-miR-22-3p	HIF1AN	55662
hsa-miR-22-3p	WWC2	80014
hsa-miR-22-3p	PHF8	23133
hsa-miR-22-3p	EPB41L2	2037
hsa-miR-22-3p	TSC22D1	8848
hsa-miR-22-3p	CSF1R	1436
hsa-miR-22-3p	RGS2	5997
hsa-miR-22-3p	FAM84A	151354
hsa-miR-22-3p	PSMB7	5695
hsa-miR-22-3p	HUNK	30811
hsa-miR-22-3p	GGACT	87769
hsa-miR-22-3p	NRAS	4893
hsa-miR-22-3p	DUSP10	11221
hsa-miR-22-3p	DCAF4L1	285429
hsa-miR-22-3p	BTG1	694
hsa-miR-22-3p	RUFY2	55680
hsa-miR-22-3p	IL6R	3570
hsa-miR-22-3p	C1orf21	81563
hsa-miR-22-3p	PRRC2C	23215
hsa-miR-22-3p	PDAP1	11333
hsa-miR-22-3p	DAD1	1603
hsa-miR-22-3p	SRPK1	6732
hsa-miR-22-3p	PPM1L	151742
hsa-miR-22-3p	DNAJC27	51277
hsa-miR-22-3p	FMN1	342184
hsa-miR-22-3p	CYTH3	9265
hsa-miR-22-3p	CASP10	843
hsa-miR-22-3p	TPI1	7167
hsa-miR-22-3p	DCP1A	55802
hsa-miR-22-3p	TMEM9B	56674
hsa-miR-22-3p	IL16	3603
hsa-miR-22-3p	PAFAH1B2	5049
hsa-miR-22-3p	ATHL1	80162
hsa-miR-22-3p	ENPP1	5167
hsa-miR-22-3p	ZNF681	148213
hsa-miR-22-3p	CCDC50	152137
hsa-miR-22-3p	TRIM66	9866
hsa-miR-22-3p	MVB12B	89853
hsa-miR-22-3p	MTF1	4520
hsa-miR-22-3p	TRABD2B	388630
hsa-miR-22-3p	UBE4A	9354
hsa-miR-22-3p	NYAP2	57624
hsa-miR-22-3p	GPR107	57720
hsa-miR-22-3p	MECP2	4204
hsa-miR-22-3p	PBX1	5087
hsa-miR-22-3p	ZMYM4	9202
hsa-miR-22-3p	USP44	84101
hsa-miR-22-3p	GATM	2628
hsa-miR-22-3p	PRKCB	5579
hsa-miR-22-3p	TTL	150465
hsa-miR-22-3p	TNFRSF1B	7133
hsa-miR-22-3p	EXD1	161829
hsa-miR-22-3p	EEF2K	29904
hsa-miR-22-3p	DDIT4	54541
hsa-miR-22-3p	KBTBD11	9920
hsa-miR-22-3p	EMILIN3	90187
hsa-miR-22-3p	MTHFR	4524
hsa-miR-22-3p	PTGDR2	11251
hsa-miR-22-3p	C12orf76	400073
hsa-miR-22-3p	CBL	867
hsa-miR-22-3p	UNG	7374
hsa-miR-22-3p	IKZF4	64375
hsa-miR-22-3p	FMNL3	91010
hsa-miR-22-3p	DNAJC16	23341
hsa-miR-22-3p	TRIP11	9321
hsa-miR-22-3p	TPM3	7170
hsa-miR-22-3p	SLFN5	162394
hsa-miR-22-3p	RPGR	6103
hsa-miR-22-3p	GPR132	29933
hsa-miR-22-3p	TRPM7	54822
hsa-miR-22-3p	PARP3	10039
hsa-miR-22-3p	NF1	4763
hsa-miR-22-3p	ZNF652	22834
hsa-miR-22-3p	APOBEC4	403314
hsa-miR-22-3p	RBM15	64783
hsa-miR-22-3p	MTDH	92140
hsa-miR-22-3p	VIT	5212
hsa-miR-22-3p	RCOR1	23186
hsa-miR-22-3p	H3F3B	3021
hsa-miR-22-3p	APCDD1L	164284
hsa-miR-22-3p	TYRO3	7301
hsa-miR-22-3p	ZNF740	283337
hsa-miR-22-3p	SLC6A1	6529
hsa-miR-22-3p	ATG2B	55102
hsa-miR-22-3p	H3F3C	440093
hsa-miR-22-3p	BMP7	655
hsa-miR-22-3p	PPARA	5465
hsa-miR-22-3p	HDAC4	9759
hsa-miR-22-3p	TFRC	7037
hsa-miR-22-3p	MYCBP	26292
hsa-miR-22-3p	BDNF	627
hsa-miR-22-3p	HTR2C	3358
hsa-miR-22-3p	MAOA	4128
hsa-miR-22-3p	NCOA1	8648
hsa-miR-22-3p	ERBB3	2065
hsa-miR-22-3p	TCEAL1	9338
hsa-miR-22-3p	PTMS	5763
hsa-miR-22-3p	PTEN	5728
hsa-miR-22-3p	HMGB1	3146
hsa-miR-22-3p	IRF5	3663
hsa-miR-22-3p	SP1	6667
hsa-miR-22-3p	HDAC6	10013
hsa-miR-22-3p	CDKN1A	1026
hsa-miR-22-3p	WNT1	7471
hsa-miR-22-3p	CD151	977
hsa-miR-22-3p	CYR61	3491
hsa-miR-22-3p	SIRT1	23411
hsa-miR-22-3p	LGALS1	3956
hsa-miR-22-3p	HIF1A	3091
hsa-miR-22-3p	BSG	682
hsa-miR-22-3p	BMPR1B	658
hsa-miR-22-3p	BMP6	654
hsa-miR-22-3p	NET1	10276
hsa-miR-22-3p	TIAM1	7074
hsa-miR-22-3p	SLC2A1	6513
hsa-miR-22-3p	TCF7	6932
hsa-miR-22-3p	LGALS9	3965
hsa-miR-22-3p	MMP14	4323
hsa-miR-22-3p	SNAI1	6615
hsa-miR-22-3p	MALAT1	378938
hsa-miR-22-3p	CXCR2	3579
hsa-miR-22-3p	CCNA2	890
hsa-miR-22-3p	UBR5	51366
hsa-miR-22-3p	TACC1	6867
hsa-miR-22-3p	MTA1	9112
hsa-miR-22-3p	MECOM	2122
hsa-miR-22-3p	AKT1	207
hsa-miR-22-3p	ERBB2	2064
hsa-miR-22-3p	ACLY	47
hsa-miR-22-3p	PLK1	5347
hsa-miR-22-3p	PPM1K	152926
hsa-miR-24-3p	AGPS	8540
hsa-miR-24-3p	CNOT6	57472
hsa-miR-24-3p	LOC100505478	100505478
hsa-miR-24-3p	ADCY7	113
hsa-miR-24-3p	PTHLH	5744
hsa-miR-24-3p	SLC12A6	9990
hsa-miR-24-3p	FGFR1OP2	26127
hsa-miR-24-3p	GRIA3	2892
hsa-miR-24-3p	NDUFAF4	29078
hsa-miR-24-3p	ACVR1C	130399
hsa-miR-24-3p	INSIG1	3638
hsa-miR-24-3p	WHSC1	7468
hsa-miR-24-3p	ZNF185	7739
hsa-miR-24-3p	INMT	11185
hsa-miR-24-3p	JRK	8629
hsa-miR-24-3p	MAST3	23031
hsa-miR-24-3p	MLEC	9761
hsa-miR-24-3p	CLSPN	63967
hsa-miR-24-3p	CALCR	799
hsa-miR-24-3p	RECQL	5965
hsa-miR-24-3p	GNE	10020
hsa-miR-24-3p	GCNT4	51301
hsa-miR-24-3p	PTGER4	5734
hsa-miR-24-3p	TAOK1	57551
hsa-miR-24-3p	NFXL1	152518
hsa-miR-24-3p	MTHFR	4524
hsa-miR-24-3p	CNDP2	55748
hsa-miR-24-3p	GDPD1	284161
hsa-miR-24-3p	FOXK1	221937
hsa-miR-24-3p	CDK16	5127
hsa-miR-24-3p	S1PR2	9294
hsa-miR-24-3p	ACSL6	23305
hsa-miR-24-3p	ACVR1B	91
hsa-miR-24-3p	BVES	11149
hsa-miR-24-3p	PLXNA4	91584
hsa-miR-24-3p	CTNS	1497
hsa-miR-24-3p	SRI	6717
hsa-miR-24-3p	BTN2A2	10385
hsa-miR-24-3p	DNAJB12	54788
hsa-miR-24-3p	SP1	6667
hsa-miR-24-3p	SLC46A1	113235
hsa-miR-24-3p	CDC14A	8556
hsa-miR-24-3p	C15orf38-AP3S2	100526783
hsa-miR-24-3p	ADD2	119
hsa-miR-24-3p	PADI1	29943
hsa-miR-24-3p	EIF3J	8669
hsa-miR-24-3p	EMC1	23065
hsa-miR-24-3p	MATR3	9782
hsa-miR-24-3p	RPS6KB1	6198
hsa-miR-24-3p	RNF138	51444
hsa-miR-24-3p	PTGFRN	5738
hsa-miR-24-3p	KLHL1	57626
hsa-miR-24-3p	TMEM213	155006
hsa-miR-24-3p	MUC3A	4584
hsa-miR-24-3p	TTC17	55761
hsa-miR-24-3p	C8orf46	254778
hsa-miR-24-3p	SERPINE2	5270
hsa-miR-24-3p	KIAA0226	9711
hsa-miR-24-3p	APBA1	320
hsa-miR-24-3p	KLF8	11279
hsa-miR-24-3p	STAT2	6773
hsa-miR-24-3p	PGPEP1	54858
hsa-miR-24-3p	SSR1	6745
hsa-miR-24-3p	IRGQ	126298
hsa-miR-24-3p	PXMP4	11264
hsa-miR-24-3p	PDXK	8566
hsa-miR-24-3p	SYT13	57586
hsa-miR-24-3p	ZNF816-ZNF321P	100529240
hsa-miR-24-3p	AP2B1	163
hsa-miR-24-3p	PTPRB	5787
hsa-miR-24-3p	DISC1	27185
hsa-miR-24-3p	HDAC2	3066
hsa-miR-24-3p	CCDC58	131076
hsa-miR-24-3p	KCNK2	3776
hsa-miR-24-3p	ZNF217	7764
hsa-miR-24-3p	CFLAR	8837
hsa-miR-24-3p	NFASC	23114
hsa-miR-24-3p	ZBTB40	9923
hsa-miR-24-3p	RAB11FIP1	80223
hsa-miR-24-3p	ENTPD1	953
hsa-miR-24-3p	SCML1	6322
hsa-miR-24-3p	LPAR6	10161
hsa-miR-24-3p	CACHD1	57685
hsa-miR-24-3p	USP54	159195
hsa-miR-24-3p	NEDD9	4739
hsa-miR-24-3p	MBNL3	55796
hsa-miR-24-3p	C19orf54	284325
hsa-miR-24-3p	C2orf72	257407
hsa-miR-24-3p	SEC14L5	9717
hsa-miR-24-3p	ABCB9	23457
hsa-miR-24-3p	FASLG	356
hsa-miR-24-3p	MGAT4A	11320
hsa-miR-24-3p	ATG4A	115201
hsa-miR-24-3p	CTSS	1520
hsa-miR-24-3p	HNF1B	6928
hsa-miR-24-3p	PNPO	55163
hsa-miR-24-3p	SSTR1	6751
hsa-miR-24-3p	ICA1L	130026
hsa-miR-24-3p	PER2	8864
hsa-miR-24-3p	ZNF664-FAM101A	100533183
hsa-miR-24-3p	BCL2L11	10018
hsa-miR-24-3p	UBE2K	3093
hsa-miR-24-3p	HEATR5B	54497
hsa-miR-24-3p	ZNF572	137209
hsa-miR-24-3p	SLC30A2	7780
hsa-miR-24-3p	IP6K2	51447
hsa-miR-24-3p	RASA1	5921
hsa-miR-24-3p	CREB3L2	64764
hsa-miR-24-3p	SCAMP5	192683
hsa-miR-24-3p	NEFM	4741
hsa-miR-24-3p	RAB37	326624
hsa-miR-24-3p	MMAB	326625
hsa-miR-24-3p	SHROOM2	357
hsa-miR-24-3p	DLGAP4	22839
hsa-miR-24-3p	TOP1	7150
hsa-miR-24-3p	SEMA4B	10509
hsa-miR-24-3p	VPS53	55275
hsa-miR-24-3p	FAM168B	130074
hsa-miR-24-3p	USP18	11274
hsa-miR-24-3p	LIMD1	8994
hsa-miR-24-3p	RANBP10	57610
hsa-miR-24-3p	ATP2B1	490
hsa-miR-24-3p	SPIN4	139886
hsa-miR-24-3p	KCNN3	3782
hsa-miR-24-3p	SPAG9	9043
hsa-miR-24-3p	ORAI2	80228
hsa-miR-24-3p	PLIN3	10226
hsa-miR-24-3p	KDM5A	5927
hsa-miR-24-3p	MARCKSL1	65108
hsa-miR-24-3p	ZCCHC16	340595
hsa-miR-24-3p	PLOD2	5352
hsa-miR-24-3p	LSM4	25804
hsa-miR-24-3p	ATP1B2	482
hsa-miR-24-3p	PLCL2	23228
hsa-miR-24-3p	SLC24A4	123041
hsa-miR-24-3p	FBN1	2200
hsa-miR-24-3p	TRAF1	7185
hsa-miR-24-3p	MAPKAPK3	7867
hsa-miR-24-3p	GBA2	57704
hsa-miR-24-3p	PTPRF	5792
hsa-miR-24-3p	TOR2A	27433
hsa-miR-24-3p	STRADB	55437
hsa-miR-24-3p	SIRPA	140885
hsa-miR-24-3p	NELL2	4753
hsa-miR-24-3p	SGCB	6443
hsa-miR-24-3p	LGSN	51557
hsa-miR-24-3p	RBBP4	5928
hsa-miR-24-3p	NOL9	79707
hsa-miR-24-3p	ZNF654	55279
hsa-miR-24-3p	VSTM4	196740
hsa-miR-24-3p	CMTM4	146223
hsa-miR-24-3p	VGLL3	389136
hsa-miR-24-3p	POLH	5429
hsa-miR-24-3p	POLR3D	661
hsa-miR-24-3p	GPM6B	2824
hsa-miR-24-3p	FUT9	10690
hsa-miR-24-3p	ZNF22	7570
hsa-miR-24-3p	CLDN6	9074
hsa-miR-24-3p	NCOA5	57727
hsa-miR-24-3p	ATRX	546
hsa-miR-24-3p	COA3	28958
hsa-miR-24-3p	CDV3	55573
hsa-miR-24-3p	KRTAP1-3	81850
hsa-miR-24-3p	SGCD	6444
hsa-miR-24-3p	AP3S2	10239
hsa-miR-24-3p	RBM11	54033
hsa-miR-24-3p	RBMS2	5939
hsa-miR-24-3p	ESRP2	80004
hsa-miR-24-3p	GK5	256356
hsa-miR-24-3p	TMEM161B	153396
hsa-miR-24-3p	CCNI2	645121
hsa-miR-24-3p	PSG7	5676
hsa-miR-24-3p	SPATS2L	26010
hsa-miR-24-3p	TMEM50B	757
hsa-miR-24-3p	CCT6B	10693
hsa-miR-24-3p	ZXDA	7789
hsa-miR-24-3p	NDST3	9348
hsa-miR-24-3p	EDA2R	60401
hsa-miR-24-3p	DBNL	28988
hsa-miR-24-3p	NEUROD1	4760
hsa-miR-24-3p	TBC1D22B	55633
hsa-miR-24-3p	KIF3C	3797
hsa-miR-24-3p	CITED4	163732
hsa-miR-24-3p	PSTPIP2	9050
hsa-miR-24-3p	STX6	10228
hsa-miR-24-3p	FAM161A	84140
hsa-miR-24-3p	SLC4A1	6521
hsa-miR-24-3p	B3GALT5	10317
hsa-miR-24-3p	ATAD2B	54454
hsa-miR-24-3p	RNF2	6045
hsa-miR-24-3p	PRSS33	260429
hsa-miR-24-3p	FAM211A	388341
hsa-miR-24-3p	ACADM	34
hsa-miR-24-3p	CDKN1B	1027
hsa-miR-24-3p	BHLHE22	27319
hsa-miR-24-3p	IFFO2	126917
hsa-miR-24-3p	TSHR	7253
hsa-miR-24-3p	SNN	8303
hsa-miR-24-3p	ST8SIA4	7903
hsa-miR-24-3p	ZNF264	9422
hsa-miR-24-3p	BNIP3L	665
hsa-miR-24-3p	PDGFRA	5156
hsa-miR-24-3p	ZNF248	57209
hsa-miR-24-3p	FGFBP3	143282
hsa-miR-24-3p	LRPAP1	4043
hsa-miR-24-3p	STK17B	9262
hsa-miR-24-3p	SLC19A2	10560
hsa-miR-24-3p	ARID5B	84159
hsa-miR-24-3p	HS6ST3	266722
hsa-miR-24-3p	DYRK2	8445
hsa-miR-24-3p	ZNF395	55893
hsa-miR-24-3p	FAM45A	404636
hsa-miR-24-3p	PSMB8	5696
hsa-miR-24-3p	ERBB3	2065
hsa-miR-24-3p	IL1A	3552
hsa-miR-24-3p	UGT2B10	7365
hsa-miR-24-3p	AAK1	22848
hsa-miR-24-3p	MPDU1	9526
hsa-miR-24-3p	BOK	666
hsa-miR-24-3p	ZBTB44	29068
hsa-miR-24-3p	NLN	57486
hsa-miR-24-3p	FAM101A	144347
hsa-miR-24-3p	MT1E	4493
hsa-miR-24-3p	IBA57	200205
hsa-miR-24-3p	CYTH2	9266
hsa-miR-24-3p	MIDN	90007
hsa-miR-24-3p	CISH	1154
hsa-miR-24-3p	LY6K	54742
hsa-miR-24-3p	AGPAT9	84803
hsa-miR-24-3p	LMBR1L	55716
hsa-miR-24-3p	KSR2	283455
hsa-miR-24-3p	NIPSNAP1	8508
hsa-miR-24-3p	PAPOLB	56903
hsa-miR-24-3p	ANKRD33B	651746
hsa-miR-24-3p	FGF11	2256
hsa-miR-24-3p	EFR3B	22979
hsa-miR-24-3p	BCORL1	63035
hsa-miR-24-3p	PHF20L1	51105
hsa-miR-24-3p	PRKCH	5583
hsa-miR-24-3p	PDP2	57546
hsa-miR-24-3p	MT1M	4499
hsa-miR-24-3p	C17orf78	284099
hsa-miR-24-3p	NAIF1	203245
hsa-miR-24-3p	ADAMTS5	11096
hsa-miR-24-3p	ZNF697	90874
hsa-miR-24-3p	SLC16A2	6567
hsa-miR-24-3p	ACRC	93953
hsa-miR-24-3p	FEN1	2237
hsa-miR-24-3p	CDK4	1019
hsa-miR-24-3p	CCNA2	890
hsa-miR-24-3p	AURKB	9212
hsa-miR-24-3p	MYC	4609
hsa-miR-24-3p	E2F2	1870
hsa-miR-24-3p	NOTCH1	4851
hsa-miR-24-3p	DHFR	1719
hsa-miR-24-3p	MAPK14	1432
hsa-miR-24-3p	TRIB3	57761
hsa-miR-24-3p	HNF4A	3172
hsa-miR-24-3p	CDKN2A	1029
hsa-miR-24-3p	BRCA1	672
hsa-miR-24-3p	POLD1	5424
hsa-miR-24-3p	DND1	373863
hsa-miR-24-3p	TGFB1	7040
hsa-miR-24-3p	FURIN	5045
hsa-miR-24-3p	FAF1	11124
hsa-miR-24-3p	ST7L	54879
hsa-miR-24-3p	H2AFX	3014
hsa-miR-24-3p	CARD10	29775
hsa-miR-24-3p	PAK4	10298
hsa-miR-24-3p	EIF2S3	1968
hsa-miR-24-3p	CDK1	983
hsa-miR-24-3p	DEDD	9191
hsa-miR-24-3p	TMED7	51014
hsa-miR-24-3p	STX16	8675
hsa-miR-24-3p	DHFRP1	573971
hsa-miR-24-3p	CHEK1	1111
hsa-miR-24-3p	CORO1A	11151
hsa-miR-24-3p	PCNA	5111
hsa-miR-24-3p	PTPN9	5780
hsa-miR-24-3p	SH3PXD2A	9644
hsa-miR-24-3p	ARHGAP19	84986
hsa-miR-24-3p	S100A8	6279
hsa-miR-24-3p	MXI1	4601
hsa-miR-24-3p	XIAP	331
hsa-miR-24-3p	NOS3	4846
hsa-miR-24-3p	CYP11B2	1585
hsa-miR-24-3p	REG4	83998
hsa-miR-24-3p	MEN1	4221
hsa-miR-24-3p	LDHA	3939
hsa-miR-24-3p	LDHB	3945
hsa-miR-24-3p	JPH2	57158
hsa-miR-24-3p	MAP3K9	4293
hsa-miR-24-3p	SSSCA1	10534
hsa-miR-24-3p	HMOX1	3162
hsa-miR-24-3p	PSAP	5660
hsa-miR-24-3p	MMP14	4323
hsa-miR-24-3p	AGPAT2	10555
hsa-miR-24-3p	IFNG	3458
hsa-miR-24-3p	FGFR3	2261
hsa-miR-24-3p	TACC3	10460
hsa-miR-24-3p	MAFB	9935
hsa-miR-24-3p	CCND1	595
hsa-miR-24-3p	NCSTN	23385
hsa-miR-24-3p	IFNR	3466
hsa-miR-24-3p	WNT4	54361
hsa-miR-24-3p	NDST1	3340
hsa-miR-24-3p	FSCN1	6624
hsa-miR-24-3p	NCAN	1463
hsa-miR-24-3p	COPS5	10987
hsa-miR-24-3p	TMEM92	162461
hsa-miR-24-3p	IL4	3565
hsa-miR-24-3p	GATA3	2625
hsa-miR-24-3p	MAPK7	5598
hsa-miR-24-3p	SLC6A4	6532
hsa-miR-24-3p	PRDX6	9588
hsa-miR-24-3p	TRIM11	81559
hsa-miR-24-3p	BCAR1	9564
hsa-miR-24-3p	TP53	7157
hsa-miR-24-3p	TNK2	10188
hsa-miR-24-3p	PDGFRB	5159
hsa-miR-24-3p	FBXW7	55294
hsa-miR-3074-5p	KLK10	5655
hsa-miR-3074-5p	SPATA2	9825
hsa-miR-3074-5p	PDIK1L	149420
hsa-miR-3074-5p	RPAIN	84268
hsa-miR-3074-5p	ITGAV	3685
hsa-miR-3074-5p	CORO2A	7464
hsa-miR-3074-5p	IRAK4	51135
hsa-miR-3074-5p	TMEM248	55069
hsa-miR-3074-5p	VGLL4	9686
hsa-miR-3074-5p	CALCR	799
hsa-miR-3074-5p	UPF2	26019
hsa-miR-3074-5p	CDK6	1021
hsa-miR-3074-5p	PTPRZ1	5803
hsa-miR-3074-5p	TRAK1	22906
hsa-miR-3074-5p	HTR7	3363
hsa-miR-3074-5p	KSR2	283455
hsa-miR-3074-5p	SYNPO2	171024
hsa-miR-3074-5p	NFIA	4774
hsa-miR-3074-5p	CTSF	8722
hsa-miR-3074-5p	SIPA1L2	57568
hsa-miR-3074-5p	SMIM12	113444
hsa-miR-3074-5p	BCCIP	56647
hsa-miR-3074-5p	BRF1	2972
hsa-miR-3074-5p	CCL5	6352
hsa-miR-3074-5p	RAB1A	5861
hsa-miR-3074-5p	ALG11	440138
hsa-miR-3074-5p	PDE4D	5144
hsa-miR-3074-5p	PHKB	5257
hsa-miR-3074-5p	ARHGEF7	8874
hsa-miR-3074-5p	RABGAP1L	9910
hsa-miR-3074-5p	STOML3	161003
hsa-miR-3074-5p	KLHL6	89857
hsa-miR-3074-5p	MEF2A	4205
hsa-miR-3074-5p	ZNF37A	7587
hsa-miR-3074-5p	EIF3L	51386
hsa-miR-3074-5p	ZFAND5	7763
hsa-miR-3074-5p	TMEM40	55287
hsa-miR-3074-5p	TNFSF8	944
hsa-miR-3074-5p	LRRC4	64101
hsa-miR-3074-5p	KCNMB4	27345
hsa-miR-3074-5p	CTSC	1075
hsa-miR-3074-5p	EFR3B	22979
hsa-miR-3074-5p	ZNF233	353355
hsa-miR-3074-5p	TMEM154	201799
hsa-miR-3074-5p	NFRKB	4798
hsa-miR-3074-5p	RIPK1	8737
hsa-miR-3074-5p	WDR17	116966
hsa-miR-3074-5p	PTBP2	58155
hsa-miR-3074-5p	TRA2B	6434
hsa-miR-3074-5p	RBMS3	27303
hsa-miR-3074-5p	UPF1	5976
hsa-miR-3074-5p	ACTN2	88
hsa-miR-3074-5p	PIP4K2A	5305
hsa-miR-3074-5p	MAGI1	9223
hsa-miR-3074-5p	PSG1	5669
hsa-miR-3074-5p	CDHR1	92211
hsa-miR-3074-5p	ST8SIA4	7903
hsa-miR-3074-5p	ASAP3	55616
hsa-miR-3074-5p	ATP9A	10079
hsa-miR-3074-5p	CD59	966
hsa-miR-3074-5p	AKTIP	64400
hsa-miR-3074-5p	TRIB2	28951
hsa-miR-3074-5p	COX15	1355
hsa-miR-3074-5p	MESDC2	23184
hsa-miR-3074-5p	MMP16	4325
hsa-miR-3074-5p	IFITM10	402778
hsa-miR-3074-5p	C6orf89	221477
hsa-miR-3074-5p	CD84	8832
hsa-miR-3074-5p	AGAP2	116986
hsa-miR-3074-5p	SUDS3	64426
hsa-miR-3074-5p	RGS2	5997
hsa-miR-3074-5p	ACVR2B	93
hsa-miR-3074-5p	PKP1	5317
hsa-miR-3074-5p	TMEM59	9528
hsa-miR-3074-5p	PTPRH	5794
hsa-miR-3074-5p	PREB	10113
hsa-miR-3074-5p	GPR113	165082
hsa-miR-3074-5p	ZBED6CL	113763
hsa-miR-3074-5p	ANKFY1	51479
hsa-miR-3074-5p	NR4A3	8013
hsa-miR-3074-5p	IPO8	10526
hsa-miR-3074-5p	VTA1	51534
hsa-miR-3074-5p	DUSP3	1845
hsa-miR-3074-5p	MAN2B2	23324
hsa-miR-3074-5p	MPZ	4359
hsa-miR-3074-5p	DBX2	440097
hsa-miR-3074-5p	CNEP1R1	255919
hsa-miR-3074-5p	NHS	4810
hsa-miR-3074-5p	PDE4DIP	9659
hsa-miR-3074-5p	MEAF6	64769
hsa-miR-3074-5p	MR1	3140
hsa-miR-3074-5p	SGCD	6444
hsa-miR-3074-5p	RPL37	6167
hsa-miR-3074-5p	ANK3	288
hsa-miR-3074-5p	PLA2G5	5322
hsa-miR-3074-5p	CSMD2	114784
hsa-miR-3074-5p	ZNF207	7756
hsa-miR-3074-5p	UFM1	51569
hsa-miR-3074-5p	FZD7	8324
hsa-miR-3074-5p	FRMD4A	55691
hsa-miR-3074-5p	SLC19A2	10560
hsa-miR-3074-5p	TTPAL	79183
hsa-miR-3074-5p	CYB5R1	51706
hsa-miR-3074-5p	GABRB3	2562
hsa-miR-3074-5p	RAB2A	5862
hsa-miR-3074-5p	SF3B3	23450
hsa-miR-3074-5p	PATE3	100169851
hsa-miR-3074-5p	C17orf103	256302
hsa-miR-3074-5p	PMAIP1	5366
hsa-miR-3074-5p	NIPA1	123606
hsa-miR-3074-5p	KCTD15	79047
hsa-miR-3074-5p	SLC6A1	6529
hsa-miR-3074-5p	DSE	29940
hsa-miR-3074-5p	PTPRJ	5795
hsa-miR-3074-5p	IVNS1ABP	10625
hsa-miR-3074-5p	CDH8	1006
hsa-miR-3074-5p	NLRC3	197358
hsa-miR-3074-5p	SLC26A9	115019
hsa-miR-3074-5p	MEIS1	4211
hsa-miR-3074-5p	GNG2	54331
hsa-miR-3074-5p	ATRN	8455
hsa-miR-3074-5p	MCTP2	55784
hsa-miR-3074-5p	IGF2BP1	10642
hsa-miR-3074-5p	SLC39A14	23516
hsa-miR-3074-5p	PCM1	5108
hsa-miR-3074-5p	MMAB	326625
hsa-miR-3074-5p	NSF	4905
hsa-miR-3074-5p	CFLAR	8837
hsa-miR-3074-5p	POU2F1	5451
hsa-miR-3074-5p	SH3TC2	79628
hsa-miR-3074-5p	SNTB1	6641
hsa-miR-3074-5p	SOX2	6657
hsa-miR-3074-5p	PTPRO	5800
hsa-miR-3074-5p	TCTEX1D1	200132
hsa-miR-3074-5p	MET	4233
hsa-miR-3074-5p	NAPG	8774
hsa-miR-3074-5p	VASH1	22846
hsa-miR-3074-5p	PHC3	80012
hsa-miR-3074-5p	ZRANB1	54764
hsa-miR-3074-5p	RPL29	6159
hsa-miR-3074-5p	PIGH	5283
hsa-miR-3074-5p	C17orf51	339263
hsa-miR-3074-5p	ROR1	4919
hsa-miR-3074-5p	NUDT16	131870
hsa-miR-3074-5p	C22orf46	79640
hsa-miR-3074-5p	UBE3A	7337
hsa-miR-3074-5p	TAP2	6891
hsa-miR-3074-5p	LDB3	11155
hsa-miR-3074-5p	IBA57	200205
hsa-miR-3074-5p	LAX1	54900
hsa-miR-3074-5p	PAG1	55824
hsa-miR-3074-5p	RRP1B	23076
hsa-miR-3074-5p	SYT15	83849
hsa-miR-3074-5p	IMPAD1	54928
hsa-miR-3074-5p	RYK	6259
hsa-miR-3074-5p	PBX1	5087
hsa-miR-3074-5p	MED1	5469
hsa-miR-3074-5p	ZNF480	147657
hsa-miR-3074-5p	VCPIP1	80124
hsa-miR-3074-5p	THBS1	7057
hsa-miR-3074-5p	ATP6V1A	523
hsa-miR-3074-5p	KHNYN	23351
hsa-miR-3074-5p	DCK	1633
hsa-miR-3074-5p	ANO5	203859
hsa-miR-3074-5p	ADAT2	134637
hsa-miR-3074-5p	MAP3K9	4293
hsa-miR-3074-5p	AIFM1	9131
hsa-miR-3074-5p	TULP4	56995
hsa-miR-3074-5p	RHBDD1	84236
hsa-miR-3074-5p	ATG2B	55102
hsa-miR-3074-5p	APOL2	23780
hsa-miR-3074-5p	SLC9A4	389015
hsa-miR-3074-5p	PPM1A	5494
hsa-miR-3074-5p	RASSF2	9770
hsa-miR-3074-5p	WDR82	80335
hsa-miR-3074-5p	THBS2	7058
hsa-miR-3074-5p	BMP7	655
hsa-miR-3074-5p	TMEM245	23731
hsa-miR-3074-5p	DLST	1743
hsa-miR-3074-5p	TMEM86A	144110
hsa-miR-3074-5p	DNALI1	7802
hsa-miR-3074-5p	ACSM5	54988
hsa-miR-3074-5p	ARHGAP29	9411
hsa-miR-3074-5p	IPO9	55705
hsa-miR-3074-5p	SORT1	6272
hsa-miR-3074-5p	POU3F1	5453
hsa-miR-3074-5p	CASC10	399726
hsa-miR-3074-5p	PDE3A	5139
hsa-miR-3074-5p	UMPS	7372
hsa-miR-3074-5p	COL14A1	7373
hsa-miR-3074-5p	LETMD1	25875
hsa-miR-3074-5p	KLF12	11278
hsa-miR-3074-5p	RICTOR	253260
hsa-miR-3074-5p	C3orf14	57415
hsa-miR-3074-5p	CHST7	56548
hsa-miR-3074-5p	C2orf91	400950
hsa-miR-31-5p	STARD13	90627
hsa-miR-31-5p	SH2D1A	4068
hsa-miR-31-5p	TFDP2	7029
hsa-miR-31-5p	HAO2	51179
hsa-miR-31-5p	TBX19	9095
hsa-miR-31-5p	GCSAML	148823
hsa-miR-31-5p	CALU	813
hsa-miR-31-5p	PAM	5066
hsa-miR-31-5p	PPP2R2A	5520
hsa-miR-31-5p	NUP153	9972
hsa-miR-31-5p	LSAMP	4045
hsa-miR-31-5p	SYNC	81493
hsa-miR-31-5p	PRKCB	5579
hsa-miR-31-5p	DCTN5	84516
hsa-miR-31-5p	RHBDL3	162494
hsa-miR-31-5p	MET	4233
hsa-miR-31-5p	NUMB	8650
hsa-miR-31-5p	VPS53	55275
hsa-miR-31-5p	SEC24A	10802
hsa-miR-31-5p	ATP11C	286410
hsa-miR-31-5p	DCX	1641
hsa-miR-31-5p	PEX5	5830
hsa-miR-31-5p	PRDX3	10935
hsa-miR-31-5p	SRD5A1	6715
hsa-miR-31-5p	KIF13B	23303
hsa-miR-31-5p	SP1	6667
hsa-miR-31-5p	SPECC1	92521
hsa-miR-31-5p	AIM1	202
hsa-miR-31-5p	MYO5A	4644
hsa-miR-31-5p	AKAP7	9465
hsa-miR-31-5p	PEX26	55670
hsa-miR-31-5p	CD55	1604
hsa-miR-31-5p	SLMO2	51012
hsa-miR-31-5p	ARID1B	57492
hsa-miR-31-5p	CCAR2	57805
hsa-miR-31-5p	GNAI3	2773
hsa-miR-31-5p	PLXNA4	91584
hsa-miR-31-5p	MAGEA1	4100
hsa-miR-31-5p	TFRC	7037
hsa-miR-31-5p	MAP3K13	9175
hsa-miR-31-5p	IGSF11	152404
hsa-miR-31-5p	PPP3R2	5535
hsa-miR-31-5p	ATP8A1	10396
hsa-miR-31-5p	PEX2	5828
hsa-miR-31-5p	BMPER	168667
hsa-miR-31-5p	PPP6R3	55291
hsa-miR-31-5p	NXPH3	11248
hsa-miR-31-5p	CEP85L	387119
hsa-miR-31-5p	RAB5B	5869
hsa-miR-31-5p	PDAP1	11333
hsa-miR-31-5p	TACC1	6867
hsa-miR-31-5p	SATB2	23314
hsa-miR-31-5p	TBX5	6910
hsa-miR-31-5p	AK4	205
hsa-miR-31-5p	NOS1	4842
hsa-miR-31-5p	MBNL3	55796
hsa-miR-31-5p	EIF4EBP2	1979
hsa-miR-31-5p	RSBN1	54665
hsa-miR-31-5p	USP28	57646
hsa-miR-31-5p	HRH4	59340
hsa-miR-31-5p	GTF2E1	2960
hsa-miR-31-5p	TRMT1L	81627
hsa-miR-31-5p	VPS26B	112936
hsa-miR-31-5p	MAGEA2	4101
hsa-miR-31-5p	XRCC5	7520
hsa-miR-31-5p	CHST15	51363
hsa-miR-31-5p	COPS2	9318
hsa-miR-31-5p	C4orf26	152816
hsa-miR-31-5p	PPP6C	5537
hsa-miR-31-5p	TESK2	10420
hsa-miR-31-5p	MAP1B	4131
hsa-miR-31-5p	C12orf52	84934
hsa-miR-31-5p	DPY19L2	283417
hsa-miR-31-5p	MFAP3	4238
hsa-miR-31-5p	CDC23	8697
hsa-miR-31-5p	MLXIP	22877
hsa-miR-31-5p	ILDR2	387597
hsa-miR-31-5p	ZFP30	22835
hsa-miR-31-5p	TBXA2R	6915
hsa-miR-31-5p	EGLN3	112399
hsa-miR-31-5p	LITAF	9516
hsa-miR-31-5p	EIF5	1983
hsa-miR-31-5p	C11orf57	55216
hsa-miR-31-5p	ATL2	64225
hsa-miR-31-5p	HADH	3033
hsa-miR-31-5p	C19orf12	83636
hsa-miR-31-5p	BTBD11	121551
hsa-miR-31-5p	ZNF3	7551
hsa-miR-31-5p	GID8	54994
hsa-miR-31-5p	MCMDC2	157777
hsa-miR-31-5p	CAMK2D	817
hsa-miR-31-5p	TACC2	10579
hsa-miR-31-5p	FBXL20	84961
hsa-miR-31-5p	KSR2	283455
hsa-miR-31-5p	SNX4	8723
hsa-miR-31-5p	RPH3A	22895
hsa-miR-31-5p	INSC	387755
hsa-miR-31-5p	RASA1	5921
hsa-miR-31-5p	CDC42EP4	23580
hsa-miR-31-5p	SNX18	112574
hsa-miR-31-5p	APBB2	323
hsa-miR-31-5p	ACSL4	2182
hsa-miR-31-5p	FAM217B	63939
hsa-miR-31-5p	ASB13	79754
hsa-miR-31-5p	UBE2K	3093
hsa-miR-31-5p	MBOAT2	129642
hsa-miR-31-5p	ZNF74	7625
hsa-miR-31-5p	RFWD3	55159
hsa-miR-31-5p	CDC20B	166979
hsa-miR-31-5p	SERPINA5	5104
hsa-miR-31-5p	PRKCE	5581
hsa-miR-31-5p	CARD8	22900
hsa-miR-31-5p	GXYLT1	283464
hsa-miR-31-5p	MGAT1	4245
hsa-miR-31-5p	SYNJ2	8871
hsa-miR-31-5p	BTBD3	22903
hsa-miR-31-5p	TMPRSS11F	389208
hsa-miR-31-5p	DDX3X	1654
hsa-miR-31-5p	RGS4	5999
hsa-miR-31-5p	SMUG1	23583
hsa-miR-31-5p	FRA10AC1	118924
hsa-miR-31-5p	MTL5	9633
hsa-miR-31-5p	NAA15	80155
hsa-miR-31-5p	TM2D2	83877
hsa-miR-31-5p	AMER1	139285
hsa-miR-31-5p	MAGEA5	4104
hsa-miR-31-5p	FZD3	7976
hsa-miR-31-5p	RIF1	55183
hsa-miR-31-5p	MTFR1	9650
hsa-miR-31-5p	CLCN3	1182
hsa-miR-31-5p	SERPINB8	5271
hsa-miR-31-5p	PTPN14	5784
hsa-miR-31-5p	NAGA	4668
hsa-miR-31-5p	KDM5A	5927
hsa-miR-31-5p	GTPBP10	85865
hsa-miR-31-5p	ETNK1	55500
hsa-miR-31-5p	ATF6	22926
hsa-miR-31-5p	ZNF805	390980
hsa-miR-31-5p	PPP1R9A	55607
hsa-miR-31-5p	DUSP7	1849
hsa-miR-31-5p	YWHAE	7531
hsa-miR-31-5p	NSF	4905
hsa-miR-31-5p	LBH	81606
hsa-miR-31-5p	IDE	3416
hsa-miR-31-5p	SOGA1	140710
hsa-miR-31-5p	MAGEA9	4108
hsa-miR-31-5p	PDHX	8050
hsa-miR-31-5p	SDC3	9672
hsa-miR-31-5p	OAS2	4939
hsa-miR-31-5p	PLCXD3	345557
hsa-miR-31-5p	JMJD6	23210
hsa-miR-31-5p	SHC4	399694
hsa-miR-31-5p	HIF1AN	55662
hsa-miR-31-5p	DCBLD2	131566
hsa-miR-31-5p	RAPGEF5	9771
hsa-miR-31-5p	HLF	3131
hsa-miR-31-5p	IL1R1	3554
hsa-miR-31-5p	DUSP19	142679
hsa-miR-31-5p	MAGEA12	4111
hsa-miR-31-5p	TRAM2	9697
hsa-miR-31-5p	CERS6	253782
hsa-miR-31-5p	PIK3C2A	5286
hsa-miR-31-5p	SRSF10	10772
hsa-miR-31-5p	SLC1A2	6506
hsa-miR-31-5p	MZT1	440145
hsa-miR-31-5p	TNFRSF9	3604
hsa-miR-31-5p	GLTSCR1	29998
hsa-miR-31-5p	MUM1L1	139221
hsa-miR-31-5p	OPRL1	4987
hsa-miR-31-5p	OXSR1	9943
hsa-miR-31-5p	HIAT1	64645
hsa-miR-31-5p	ZDHHC18	84243
hsa-miR-31-5p	VTI1A	143187
hsa-miR-31-5p	RNF144A	9781
hsa-miR-31-5p	RNF144B	255488
hsa-miR-31-5p	CTNND2	1501
hsa-miR-31-5p	POU2F1	5451
hsa-miR-31-5p	SLC6A6	6533
hsa-miR-31-5p	SLC2A4	6517
hsa-miR-31-5p	QKI	9444
hsa-miR-31-5p	SF3B3	23450
hsa-miR-31-5p	CDC42SE1	56882
hsa-miR-31-5p	TRIM67	440730
hsa-miR-31-5p	NRIP3	56675
hsa-miR-31-5p	FCGR1A	2209
hsa-miR-31-5p	RNF135	84282
hsa-miR-31-5p	KRT6A	3853
hsa-miR-31-5p	MRPS16	51021
hsa-miR-31-5p	CREG1	8804
hsa-miR-31-5p	TNFSF15	9966
hsa-miR-31-5p	IGFBP7	3490
hsa-miR-31-5p	SH3TC2	79628
hsa-miR-31-5p	HSD17B6	8630
hsa-miR-31-5p	RIMS3	9783
hsa-miR-31-5p	MAGEA2B	266740
hsa-miR-31-5p	SLC5A3	6526
hsa-miR-31-5p	CDHR1	92211
hsa-miR-31-5p	VGLL3	389136
hsa-miR-31-5p	AFF1	4299
hsa-miR-31-5p	KIAA1429	25962
hsa-miR-31-5p	MAGEA9B	728269
hsa-miR-31-5p	RAD18	56852
hsa-miR-31-5p	FCGR1B	2210
hsa-miR-31-5p	LRPAP1	4043
hsa-miR-31-5p	SCCPDH	51097
hsa-miR-31-5p	RND3	390
hsa-miR-31-5p	LASP1	3927
hsa-miR-31-5p	GSTCD	79807
hsa-miR-31-5p	ZNF512	84450
hsa-miR-31-5p	MAP4	4134
hsa-miR-31-5p	PDZD2	23037
hsa-miR-31-5p	CACNG4	27092
hsa-miR-31-5p	MAGEA10-MAGEA5	100533997
hsa-miR-31-5p	PDP2	57546
hsa-miR-31-5p	RHOA	387
hsa-miR-31-5p	LATS2	26524
hsa-miR-31-5p	FOXP3	50943
hsa-miR-31-5p	SELE	6401
hsa-miR-31-5p	CASR	846
hsa-miR-31-5p	ITGA5	3678
hsa-miR-31-5p	MPRIP	23164
hsa-miR-31-5p	MMP16	4325
hsa-miR-31-5p	RDX	5962
hsa-miR-31-5p	DMD	1756
hsa-miR-31-5p	TIAM1	7074
hsa-miR-31-5p	DKK1	22943
hsa-miR-31-5p	DACT3	147906
hsa-miR-31-5p	WASF3	10810
hsa-miR-31-5p	STK40	83931
hsa-miR-31-5p	MCM2	4171
hsa-miR-31-5p	CDK1	983
hsa-miR-31-5p	MLH1	4292
hsa-miR-31-5p	SRC	6714
hsa-miR-31-5p	MAP4K4	9448
hsa-miR-31-5p	RAB27A	5873
hsa-miR-31-5p	EMSY	56946
hsa-miR-31-5p	ARID1A	8289
hsa-miR-31-5p	ABCB9	23457
hsa-miR-31-5p	RHOBTB1	9886
hsa-miR-31-5p	SP7	121340
hsa-miR-31-5p	E2F2	1870
hsa-miR-31-5p	C1QTNF9	338872
hsa-miR-31-5p	DOCK1	1793
hsa-miR-31-5p	SMAD4	4089
hsa-miR-31-5p	SGPP2	130367
hsa-miR-31-5p	SOX4	6659
hsa-miR-31-5p	BAP1	8314
hsa-miR-31-5p	IL25	64806
hsa-miR-31-5p	SPRED1	161742
hsa-miR-31-5p	SPRED2	200734
hsa-miR-31-5p	SPRY1	10252
hsa-miR-31-5p	SPRY3	10251
hsa-miR-31-5p	SPRY4	81848
hsa-miR-31-5p	GNA13	10672
hsa-miR-31-5p	FOXO3	2309
hsa-miR-31-5p	STMN1	3925
hsa-miR-339-3p	FAM19A2	338811
hsa-miR-339-3p	USP25	29761
hsa-miR-339-3p	KLHL18	23276
hsa-miR-339-3p	ATP6V0A4	50617
hsa-miR-339-3p	CCDC77	84318
hsa-miR-339-3p	TUBB	203068
hsa-miR-339-3p	FOXO1	2308
hsa-miR-339-3p	NFKB1	4790
hsa-miR-339-3p	MCL1	4170
hsa-miR-345-5p	SPAST	6683
hsa-miR-345-5p	PLEKHH1	57475
hsa-miR-345-5p	ZSWIM1	90204
hsa-miR-345-5p	MEGF6	1953
hsa-miR-345-5p	GPANK1	7918
hsa-miR-345-5p	SRI	6717
hsa-miR-345-5p	TCF4	6925
hsa-miR-345-5p	MROH8	140699
hsa-miR-345-5p	PPP2R3A	5523
hsa-miR-345-5p	USP15	9958
hsa-miR-345-5p	SORT1	6272
hsa-miR-345-5p	ZDHHC3	51304
hsa-miR-345-5p	BRWD1	54014
hsa-miR-345-5p	LAT2	7462
hsa-miR-345-5p	E2F3	1871
hsa-miR-345-5p	SPTBN1	6711
hsa-miR-345-5p	SRGAP1	57522
hsa-miR-345-5p	RAB39B	116442
hsa-miR-345-5p	GYPE	2996
hsa-miR-345-5p	AIMP2	7965
hsa-miR-345-5p	TBX5	6910
hsa-miR-345-5p	TMEM120B	144404
hsa-miR-345-5p	DNAJC3	5611
hsa-miR-345-5p	RBBP9	10741
hsa-miR-345-5p	CPXCR1	53336
hsa-miR-345-5p	TMEM33	55161
hsa-miR-345-5p	GLUD1	2746
hsa-miR-345-5p	GATAD1	57798
hsa-miR-345-5p	RC3H1	149041
hsa-miR-345-5p	NAP1L4	4676
hsa-miR-345-5p	FZD3	7976
hsa-miR-345-5p	C12orf66	144577
hsa-miR-345-5p	PRPSAP1	5635
hsa-miR-345-5p	IKZF2	22807
hsa-miR-345-5p	SRSF7	6432
hsa-miR-345-5p	C12orf4	57102
hsa-miR-345-5p	PPP2R2A	5520
hsa-miR-345-5p	USP46	64854
hsa-miR-345-5p	USP54	159195
hsa-miR-345-5p	OTX2	5015
hsa-miR-345-5p	GPR55	9290
hsa-miR-345-5p	HSPA12A	259217
hsa-miR-345-5p	PRSS8	5652
hsa-miR-345-5p	LARP1B	55132
hsa-miR-345-5p	KIAA1244	57221
hsa-miR-345-5p	ZNF133	7692
hsa-miR-345-5p	CLMN	79789
hsa-miR-345-5p	BMPER	168667
hsa-miR-345-5p	TJP2	9414
hsa-miR-345-5p	GAN	8139
hsa-miR-345-5p	ZNF621	285268
hsa-miR-345-5p	PSG1	5669
hsa-miR-345-5p	KDM4C	23081
hsa-miR-345-5p	SLC1A2	6506
hsa-miR-345-5p	RAVER2	55225
hsa-miR-345-5p	ARHGAP31	57514
hsa-miR-345-5p	RAB3B	5865
hsa-miR-345-5p	PRR3	80742
hsa-miR-345-5p	SLC25A35	399512
hsa-miR-345-5p	PCSK1	5122
hsa-miR-345-5p	TBC1D5	9779
hsa-miR-345-5p	THPO	7066
hsa-miR-345-5p	RAB27B	5874
hsa-miR-345-5p	SLC8A1	6546
hsa-miR-345-5p	YEATS2	55689
hsa-miR-345-5p	KIAA1324	57535
hsa-miR-345-5p	SLBP	7884
hsa-miR-345-5p	RFC1	5981
hsa-miR-345-5p	HOOK3	84376
hsa-miR-345-5p	NCMAP	400746
hsa-miR-345-5p	WDR43	23160
hsa-miR-345-5p	ARHGEF37	389337
hsa-miR-345-5p	MLC1	23209
hsa-miR-345-5p	DCP1A	55802
hsa-miR-345-5p	RNF4	6047
hsa-miR-345-5p	DCTN5	84516
hsa-miR-345-5p	ARHGAP6	395
hsa-miR-345-5p	ZCCHC14	23174
hsa-miR-345-5p	GOLGA7B	401647
hsa-miR-345-5p	RGS1	5996
hsa-miR-345-5p	CCBL2	56267
hsa-miR-345-5p	THSD4	79875
hsa-miR-345-5p	RPA1	6117
hsa-miR-345-5p	RSAD2	91543
hsa-miR-345-5p	PFKFB2	5208
hsa-miR-345-5p	SLC9A8	23315
hsa-miR-345-5p	TBC1D30	23329
hsa-miR-345-5p	UMPS	7372
hsa-miR-345-5p	FNDC9	408263
hsa-miR-345-5p	CYB5D1	124637
hsa-miR-345-5p	SUV420H1	51111
hsa-miR-345-5p	SLC7A11	23657
hsa-miR-345-5p	EZR	7430
hsa-miR-345-5p	ANKRD33B	651746
hsa-miR-345-5p	MRS2	57380
hsa-miR-345-5p	SMS	6611
hsa-miR-345-5p	RPS6KB1	6198
hsa-miR-345-5p	GMEB2	26205
hsa-miR-345-5p	LOC100506422	100506422
hsa-miR-345-5p	CDKN1A	1026
hsa-miR-345-5p	ABCC1	4363
hsa-miR-369-5p	RP2	6102
hsa-miR-369-5p	EPS8L1	54869
hsa-miR-369-5p	FABP4	2167
hsa-miR-369-5p	DNMT3A	1788
hsa-miR-369-5p	DNMT3B	1789
hsa-miR-411-5p	HSDL2	84263
hsa-miR-411-5p	CXADR	1525
hsa-miR-411-5p	PCDHA10	56139
hsa-miR-411-5p	PCDHA1	56147
hsa-miR-411-5p	DTL	51514
hsa-miR-411-5p	ZNF182	7569
hsa-miR-411-5p	ACVR1C	130399
hsa-miR-411-5p	CCPG1	9236
hsa-miR-411-5p	TVP23C	201158
hsa-miR-411-5p	KLRD1	3824
hsa-miR-411-5p	NHSL1	57224
hsa-miR-411-5p	FAM227A	646851
hsa-miR-411-5p	GTPBP8	29083
hsa-miR-411-5p	SLC9A2	6549
hsa-miR-411-5p	ENPP1	5167
hsa-miR-411-5p	ORAI2	80228
hsa-miR-411-5p	KNSTRN	90417
hsa-miR-411-5p	KCNQ5	56479
hsa-miR-411-5p	C21orf91	54149
hsa-miR-411-5p	GPR65	8477
hsa-miR-411-5p	MYO3B	140469
hsa-miR-411-5p	C19orf82	284385
hsa-miR-411-5p	LPP	4026
hsa-miR-411-5p	ZNF287	57336
hsa-miR-411-5p	ZSCAN30	100101467
hsa-miR-411-5p	SYT4	6860
hsa-miR-411-5p	PGR	5241
hsa-miR-411-5p	CALML4	91860
hsa-miR-411-5p	DBT	1629
hsa-miR-411-5p	PCDHA8	56140
hsa-miR-411-5p	UBE2R2	54926
hsa-miR-411-5p	CD84	8832
hsa-miR-411-5p	TMEM56	148534
hsa-miR-411-5p	PCDHA9	9752
hsa-miR-411-5p	ZNF680	340252
hsa-miR-411-5p	ISY1	57461
hsa-miR-411-5p	ATF1	466
hsa-miR-411-5p	RAB3B	5865
hsa-miR-411-5p	KCNIP4	80333
hsa-miR-411-5p	MITD1	129531
hsa-miR-411-5p	MEGF8	1954
hsa-miR-411-5p	PCDHA7	56141
hsa-miR-411-5p	PCDHA6	56142
hsa-miR-411-5p	PRELID2	153768
hsa-miR-411-5p	ABCC9	10060
hsa-miR-411-5p	ZDHHC21	340481
hsa-miR-411-5p	AUH	549
hsa-miR-411-5p	ZNF148	7707
hsa-miR-411-5p	SMARCA2	6595
hsa-miR-411-5p	FYB	2533
hsa-miR-411-5p	KIAA1191	57179
hsa-miR-411-5p	ENKUR	219670
hsa-miR-411-5p	YME1L1	10730
hsa-miR-411-5p	2018-09-14	346288
hsa-miR-411-5p	MAN2A2	4122
hsa-miR-411-5p	KIAA1614	57710
hsa-miR-411-5p	BNIP3	664
hsa-miR-411-5p	SYNJ2BP	55333
hsa-miR-411-5p	SKAP2	8935
hsa-miR-411-5p	PCDHA5	56143
hsa-miR-411-5p	ARRDC3	57561
hsa-miR-411-5p	PXDC1	221749
hsa-miR-411-5p	DBF4	10926
hsa-miR-411-5p	C12orf73	728568
hsa-miR-411-5p	EIF1AX	1964
hsa-miR-411-5p	MICB	4277
hsa-miR-411-5p	PLEKHA2	59339
hsa-miR-411-5p	CDS1	1040
hsa-miR-411-5p	PCDHAC2	56134
hsa-miR-411-5p	ATG12	9140
hsa-miR-411-5p	SP2	6668
hsa-miR-411-5p	LRRFIP1	9208
hsa-miR-411-5p	NR3C1	2908
hsa-miR-411-5p	PCDHA4	56144
hsa-miR-411-5p	FEM1C	56929
hsa-miR-411-5p	CREBZF	58487
hsa-miR-411-5p	FBXO33	254170
hsa-miR-411-5p	ASCC3	10973
hsa-miR-411-5p	PDCD2	5134
hsa-miR-411-5p	MRPS25	64432
hsa-miR-411-5p	CHM	1121
hsa-miR-411-5p	PCDHAC1	56135
hsa-miR-411-5p	STK17A	9263
hsa-miR-411-5p	SP100	6672
hsa-miR-411-5p	SH3TC2	79628
hsa-miR-411-5p	HNRNPH1	3187
hsa-miR-411-5p	PCDHA3	56145
hsa-miR-411-5p	CAMK1D	57118
hsa-miR-411-5p	GK5	256356
hsa-miR-411-5p	METTL7A	25840
hsa-miR-411-5p	GNAZ	2781
hsa-miR-411-5p	LRRC19	64922
hsa-miR-411-5p	SPRY4	81848
hsa-miR-411-5p	CSNK1E	1454
hsa-miR-411-5p	PCDHA13	56136
hsa-miR-411-5p	TFPI	7035
hsa-miR-411-5p	HTR5A	3361
hsa-miR-411-5p	PCDHA2	56146
hsa-miR-411-5p	SLC16A12	387700
hsa-miR-411-5p	GGA1	26088
hsa-miR-411-5p	MAP3K1	4214
hsa-miR-411-5p	PDE8A	5151
hsa-miR-411-5p	NABP2	79035
hsa-miR-411-5p	PCDHA12	56137
hsa-miR-411-5p	RHOQ	23433
hsa-miR-411-5p	TLL1	7092
hsa-miR-411-5p	SAMD5	389432
hsa-miR-411-5p	UQCRQ	27089
hsa-miR-411-5p	CYBRD1	79901
hsa-miR-411-5p	PCDHA11	56138
hsa-miR-411-5p	USP25	29761
hsa-miR-411-5p	TCHHL1	126637
hsa-miR-411-5p	ELFN1	392617
hsa-miR-411-5p	C11orf54	28970
hsa-miR-411-5p	SEL1L	6400
hsa-miR-411-5p	GRB2	2885
hsa-miR-425-5p	BVES	11149
hsa-miR-425-5p	ZMAT3	64393
hsa-miR-425-5p	NUDT4	11163
hsa-miR-425-5p	ATP5G3	518
hsa-miR-425-5p	VRK2	7444
hsa-miR-425-5p	PDE5A	8654
hsa-miR-425-5p	C21orf91	54149
hsa-miR-425-5p	PAFAH1B1	5048
hsa-miR-425-5p	ZNF286B	729288
hsa-miR-425-5p	PRICKLE2	166336
hsa-miR-425-5p	PCMT1	5110
hsa-miR-425-5p	MINOS1	440574
hsa-miR-425-5p	PTPRN2	5799
hsa-miR-425-5p	ARMC8	25852
hsa-miR-425-5p	LCOR	84458
hsa-miR-425-5p	KLF3	51274
hsa-miR-425-5p	ACE	1636
hsa-miR-425-5p	QKI	9444
hsa-miR-425-5p	TTC19	54902
hsa-miR-425-5p	SLC16A1	6566
hsa-miR-425-5p	AGL	178
hsa-miR-425-5p	SLC7A2	6542
hsa-miR-425-5p	DNAJC27	51277
hsa-miR-425-5p	SSX2IP	117178
hsa-miR-425-5p	MAN1C1	57134
hsa-miR-425-5p	FAM133B	257415
hsa-miR-425-5p	DYNC2H1	79659
hsa-miR-425-5p	LPP	4026
hsa-miR-425-5p	TLK1	9874
hsa-miR-425-5p	SPIRE1	56907
hsa-miR-425-5p	IQGAP1	8826
hsa-miR-425-5p	MRPS6	64968
hsa-miR-425-5p	PDCD10	11235
hsa-miR-425-5p	BRCA2	675
hsa-miR-425-5p	B3GALNT1	8706
hsa-miR-425-5p	ING3	54556
hsa-miR-425-5p	SHISA9	729993
hsa-miR-425-5p	GK5	256356
hsa-miR-425-5p	ABAT	18
hsa-miR-425-5p	AGPAT9	84803
hsa-miR-425-5p	PRPF38B	55119
hsa-miR-425-5p	FSCN1	6624
hsa-miR-425-5p	MPZL1	9019
hsa-miR-425-5p	ARL17A	51326
hsa-miR-425-5p	CLCN4	1183
hsa-miR-425-5p	USP31	57478
hsa-miR-425-5p	C17orf58	284018
hsa-miR-425-5p	DHX40	79665
hsa-miR-425-5p	MDM4	4194
hsa-miR-425-5p	ZNF695	57116
hsa-miR-425-5p	TMEM135	65084
hsa-miR-425-5p	FOXJ3	22887
hsa-miR-425-5p	SLC25A20	788
hsa-miR-425-5p	FAM63B	54629
hsa-miR-425-5p	PHKA1	5255
hsa-miR-425-5p	MFSD8	256471
hsa-miR-425-5p	PEX12	5193
hsa-miR-425-5p	RCHY1	25898
hsa-miR-425-5p	GTPBP10	85865
hsa-miR-425-5p	CAB39	51719
hsa-miR-425-5p	MCOLN3	55283
hsa-miR-425-5p	SORL1	6653
hsa-miR-425-5p	EPM2AIP1	9852
hsa-miR-425-5p	TERF1	7013
hsa-miR-425-5p	ARMCX3	51566
hsa-miR-425-5p	CTSS	1520
hsa-miR-425-5p	NUFIP2	57532
hsa-miR-425-5p	ZNF780A	284323
hsa-miR-425-5p	SETD6	79918
hsa-miR-425-5p	MRVI1	10335
hsa-miR-425-5p	ODF2L	57489
hsa-miR-425-5p	PDS5B	23047
hsa-miR-425-5p	CBL	867
hsa-miR-425-5p	CRLS1	54675
hsa-miR-425-5p	PPAT	5471
hsa-miR-425-5p	PEX13	5194
hsa-miR-425-5p	RGS4	5999
hsa-miR-425-5p	ZAK	51776
hsa-miR-425-5p	DYNC1I2	1781
hsa-miR-425-5p	SCAMP1	9522
hsa-miR-425-5p	STRADB	55437
hsa-miR-425-5p	HSPA13	6782
hsa-miR-425-5p	CYBB	1536
hsa-miR-425-5p	SH3RF1	57630
hsa-miR-425-5p	EOGT	285203
hsa-miR-425-5p	FAR1	84188
hsa-miR-425-5p	MYO5A	4644
hsa-miR-425-5p	SEL1L3	23231
hsa-miR-425-5p	FOXN3	1112
hsa-miR-425-5p	PTEN	5728
hsa-miR-425-5p	PGM2L1	283209
hsa-miR-425-5p	ABL2	27
hsa-miR-425-5p	LRIG1	26018
hsa-miR-425-5p	BTF3L4	91408
hsa-miR-425-5p	BRWD1	54014
hsa-miR-425-5p	GABRR1	2569
hsa-miR-425-5p	SH3PXD2A	9644
hsa-miR-425-5p	STRN	6801
hsa-miR-425-5p	EDIL3	10085
hsa-miR-425-5p	ANK3	288
hsa-miR-425-5p	THRB	7068
hsa-miR-425-5p	TRDMT1	1787
hsa-miR-425-5p	S100A7A	338324
hsa-miR-425-5p	CEACAM6	4680
hsa-miR-425-5p	ZNF608	57507
hsa-miR-425-5p	MANEA	79694
hsa-miR-425-5p	CBX5	23468
hsa-miR-425-5p	WHSC1	7468
hsa-miR-425-5p	SCEL	8796
hsa-miR-425-5p	AHI1	54806
hsa-miR-425-5p	RAB27B	5874
hsa-miR-425-5p	FAM169A	26049
hsa-miR-425-5p	ZNF420	147923
hsa-miR-425-5p	G6PC2	57818
hsa-miR-425-5p	CXCL3	2921
hsa-miR-425-5p	BMS1	9790
hsa-miR-425-5p	MREG	55686
hsa-miR-425-5p	TSN	7247
hsa-miR-425-5p	BEND3	57673
hsa-miR-425-5p	SPRY3	10251
hsa-miR-425-5p	HLF	3131
hsa-miR-425-5p	C7orf76	401388
hsa-miR-425-5p	USP45	85015
hsa-miR-425-5p	NDUFA4	4697
hsa-miR-425-5p	KIAA1549L	25758
hsa-miR-425-5p	CNGB1	1258
hsa-miR-425-5p	DEK	7913
hsa-miR-425-5p	MACC1	346389
hsa-miR-425-5p	PLCB2	5330
hsa-miR-425-5p	RGS13	6003
hsa-miR-425-5p	PCDHB5	26167
hsa-miR-425-5p	DPY19L3	147991
hsa-miR-425-5p	CREBZF	58487
hsa-miR-425-5p	IL11	3589
hsa-miR-425-5p	KIAA0319	9856
hsa-miR-425-5p	CSGALNACT1	55790
hsa-miR-425-5p	EXOC5	10640
hsa-miR-425-5p	NDUFA5	4698
hsa-miR-425-5p	GFOD2	81577
hsa-miR-425-5p	HSPB8	26353
hsa-miR-425-5p	CPOX	1371
hsa-miR-425-5p	TTF2	8458
hsa-miR-425-5p	RIT1	6016
hsa-miR-425-5p	MIA3	375056
hsa-miR-425-5p	POLH	5429
hsa-miR-425-5p	AFF4	27125
hsa-miR-425-5p	MOB1B	92597
hsa-miR-425-5p	SLC35A5	55032
hsa-miR-425-5p	TMEM56	148534
hsa-miR-425-5p	CHP2	63928
hsa-miR-425-5p	KRT4	3851
hsa-miR-425-5p	CUL3	8452
hsa-miR-425-5p	FAM204A	63877
hsa-miR-425-5p	PDE10A	10846
hsa-miR-425-5p	TSPAN7	7102
hsa-miR-425-5p	CSNK1G1	53944
hsa-miR-425-5p	MAP3K5	4217
hsa-miR-425-5p	ZBTB34	403341
hsa-miR-425-5p	ALG10B	144245
hsa-miR-425-5p	OCRL	4952
hsa-miR-425-5p	SMG1	23049
hsa-miR-425-5p	EIF2A	83939
hsa-miR-425-5p	FOXD3	27022
hsa-miR-425-5p	PPM1D	8493
hsa-miR-425-5p	KLHL28	54813
hsa-miR-425-5p	CXCL6	6372
hsa-miR-425-5p	C11orf87	399947
hsa-miR-425-5p	MAPK6	5597
hsa-miR-425-5p	SIAH2	6478
hsa-miR-425-5p	HIPK2	28996
hsa-miR-425-5p	ADCY1	107
hsa-miR-425-5p	SPTLC3	55304
hsa-miR-425-5p	PAPD5	64282
hsa-miR-425-5p	LAMP2	3920
hsa-miR-425-5p	PAG1	55824
hsa-miR-425-5p	SUPT3H	8464
hsa-miR-425-5p	PDLIM5	10611
hsa-miR-425-5p	ARL1	400
[truncated: 29 more rows]

## Sheet:  Red
miRNA	Target Gene	EntrezID
hsa-let-7a-5p	EMB	133418
hsa-let-7a-5p	GPR26	2849
hsa-let-7a-5p	DPH3	285381
hsa-let-7a-5p	GAS7	8522
hsa-let-7a-5p	SNX16	64089
hsa-let-7a-5p	CBX5	23468
hsa-let-7a-5p	DMD	1756
hsa-let-7a-5p	KIAA1429	25962
hsa-let-7a-5p	FOXP2	93986
hsa-let-7a-5p	MRS2	57380
hsa-let-7a-5p	EDN1	1906
hsa-let-7a-5p	NEK3	4752
hsa-let-7a-5p	NAA38	51691
hsa-let-7a-5p	RPUSD3	285367
hsa-let-7a-5p	RDX	5962
hsa-let-7a-5p	AMT	275
hsa-let-7a-5p	SERF2	10169
hsa-let-7a-5p	C12orf49	79794
hsa-let-7a-5p	ACP1	52
hsa-let-7a-5p	C14orf28	122525
hsa-let-7a-5p	TGFBR3	7049
hsa-let-7a-5p	CTPS2	56474
hsa-let-7a-5p	IGDCC3	9543
hsa-let-7a-5p	CD59	966
hsa-let-7a-5p	FNDC3A	22862
hsa-let-7a-5p	ZCCHC9	84240
hsa-let-7a-5p	HDX	139324
hsa-let-7a-5p	IGF1R	3480
hsa-let-7a-5p	RSPO2	340419
hsa-let-7a-5p	CYP4F2	8529
hsa-let-7a-5p	CPEB1	64506
hsa-let-7a-5p	AHCTF1	25909
hsa-let-7a-5p	PARS2	25973
hsa-let-7a-5p	STARD9	57519
hsa-let-7a-5p	ERCC6	2074
hsa-let-7a-5p	PBX3	5090
hsa-let-7a-5p	CCNJ	54619
hsa-let-7a-5p	SCD	6319
hsa-let-7a-5p	ATP6V1C1	528
hsa-let-7a-5p	DOK3	79930
hsa-let-7a-5p	SOCS4	122809
hsa-let-7a-5p	COL14A1	7373
hsa-let-7a-5p	SMARCAD1	56916
hsa-let-7a-5p	TTLL4	9654
hsa-let-7a-5p	MDM4	4194
hsa-let-7a-5p	LIPT2	387787
hsa-let-7a-5p	TNFSF10	8743
hsa-let-7a-5p	PLA2G3	50487
hsa-let-7a-5p	NPHP3	27031
hsa-let-7a-5p	ESR2	2100
hsa-let-7a-5p	PIGA	5277
hsa-let-7a-5p	RBM12B	389677
hsa-let-7a-5p	TGFBR1	7046
hsa-let-7a-5p	BACH1	571
hsa-let-7a-5p	IGF2BP1	10642
hsa-let-7a-5p	MED8	112950
hsa-let-7a-5p	ADRB2	154
hsa-let-7a-5p	ACVR1C	130399
hsa-let-7a-5p	UTRN	7402
hsa-let-7a-5p	GJC1	10052
hsa-let-7a-5p	CLCN5	1184
hsa-let-7a-5p	HIC2	23119
hsa-let-7a-5p	DDI2	84301
hsa-let-7a-5p	A1CF	29974
hsa-let-7a-5p	ZNF583	147949
hsa-let-7a-5p	NAP1L1	4673
hsa-let-7a-5p	LIN28B	389421
hsa-let-7a-5p	LRIG2	9860
hsa-let-7a-5p	CPA4	51200
hsa-let-7a-5p	MED28	80306
hsa-let-7a-5p	HOXA1	3198
hsa-let-7a-5p	MAPK6	5597
hsa-let-7a-5p	PDPR	55066
hsa-let-7a-5p	FIGNL2	401720
hsa-let-7a-5p	THRSP	7069
hsa-let-7a-5p	IGF2BP3	10643
hsa-let-7a-5p	OPA3	80207
hsa-let-7a-5p	LRIG3	121227
hsa-let-7a-5p	CASP3	836
hsa-let-7a-5p	TRIM71	131405
hsa-let-7a-5p	PRDM2	7799
hsa-let-7a-5p	SPRYD7	57213
hsa-let-7a-5p	OLFM4	10562
hsa-let-7a-5p	PPAPDC1B	84513
hsa-let-7a-5p	GDF6	392255
hsa-let-7a-5p	LPGAT1	9926
hsa-let-7a-5p	FAM103A1	83640
hsa-let-7a-5p	PTAFR	5724
hsa-let-7a-5p	FIGN	55137
hsa-let-7a-5p	PLEKHG7	440107
hsa-let-7a-5p	FZD3	7976
hsa-let-7a-5p	IGF2BP2	10644
hsa-let-7a-5p	ZBP1	81030
hsa-let-7a-5p	CDC34	997
hsa-let-7a-5p	CD200R1	131450
hsa-let-7a-5p	ODF2L	57489
hsa-let-7a-5p	ABCC2	1244
hsa-let-7a-5p	PLEKHA8	84725
hsa-let-7a-5p	SLC5A9	200010
hsa-let-7a-5p	NGF	4803
hsa-let-7a-5p	C8orf58	541565
hsa-let-7a-5p	HELZ	9931
hsa-let-7a-5p	SRD5A3	79644
hsa-let-7a-5p	ARHGEF38	54848
hsa-let-7a-5p	PPP1R15B	84919
hsa-let-7a-5p	DDX19A	55308
hsa-let-7a-5p	GAN	8139
hsa-let-7a-5p	ZNF275	10838
hsa-let-7a-5p	SYNC	81493
hsa-let-7a-5p	AMACR	23600
hsa-let-7a-5p	ZNF341	84905
hsa-let-7a-5p	NRAS	4893
hsa-let-7a-5p	POTEM	641455
hsa-let-7a-5p	ZNF322	79692
hsa-let-7a-5p	ANKRD49	54851
hsa-let-7a-5p	SMIM3	85027
hsa-let-7a-5p	YOD1	55432
hsa-let-7a-5p	COIL	8161
hsa-let-7a-5p	SUB1	10923
hsa-let-7a-5p	COL3A1	1281
hsa-let-7a-5p	HMGA2	8091
hsa-let-7a-5p	IFT80	57560
hsa-let-7a-5p	PGRMC1	10857
hsa-let-7a-5p	SDR42E1	93517
hsa-let-7a-5p	PRPF38B	55119
hsa-let-7a-5p	MMS22L	253714
hsa-let-7a-5p	RGPD6	729540
hsa-let-7a-5p	ABCC5	10057
hsa-let-7a-5p	B3GNT7	93010
hsa-let-7a-5p	RPL36A	6173
hsa-let-7a-5p	HIF1AN	55662
hsa-let-7a-5p	RGPD8	727851
hsa-let-7a-5p	MAP4K3	8491
hsa-let-7a-5p	IFI44L	10964
hsa-let-7a-5p	ATG10	83734
hsa-let-7a-5p	MFSD4	148808
hsa-let-7a-5p	SMC1A	8243
hsa-let-7a-5p	SLC35D2	11046
hsa-let-7a-5p	TRMT10A	93587
hsa-let-7a-5p	FAM178A	55719
hsa-let-7a-5p	KCTD21	283219
hsa-let-7a-5p	CRTAM	56253
hsa-let-7a-5p	DDTL	100037417
hsa-let-7a-5p	DDX19B	11269
hsa-let-7a-5p	TMEM167A	153339
hsa-let-7a-5p	ADAMTS8	11095
hsa-let-7a-5p	TMEM2	23670
hsa-let-7a-5p	C3orf38	285237
hsa-let-7a-5p	MASP1	5648
hsa-let-7a-5p	SIGLEC14	100049587
hsa-let-7a-5p	HAND1	9421
hsa-let-7a-5p	RGPD5	84220
hsa-let-7a-5p	GATM	2628
hsa-let-7a-5p	PRTG	283659
hsa-let-7a-5p	FRMD4B	23150
hsa-let-7a-5p	DNA2	1763
hsa-let-7a-5p	GCNT4	51301
hsa-let-7a-5p	THAP9	79725
hsa-let-7a-5p	UHRF2	115426
hsa-let-7a-5p	ONECUT2	9480
hsa-let-7a-5p	CDK6	1021
hsa-let-7a-5p	MYC	4609
hsa-let-7a-5p	NKIRAS2	28511
hsa-let-7a-5p	ITGB3	3690
hsa-let-7a-5p	NF2	4771
hsa-let-7a-5p	KRAS	3845
hsa-let-7a-5p	PRDM1	639
hsa-let-7a-5p	RAVER2	55225
hsa-let-7a-5p	HMGA1	3159
hsa-let-7a-5p	AGO4	192670
hsa-let-7a-5p	DICER1	23405
hsa-let-7a-5p	HRAS	3265
hsa-let-7a-5p	IGF2	3481
hsa-let-7a-5p	LIN28A	79727
hsa-let-7a-5p	IL6	3569
hsa-let-7a-5p	E2F2	1870
hsa-let-7a-5p	CCND2	894
hsa-let-7a-5p	EWSR1	2130
hsa-let-7a-5p	CCR7	1236
hsa-let-7a-5p	CDKN1A	1026
hsa-let-7a-5p	HAS2	3037
hsa-let-7a-5p	EGFR	1956
hsa-let-7a-5p	RRM2	6241
hsa-let-7a-5p	AGO1	26523
hsa-let-7a-5p	EZH2	2146
hsa-let-7a-5p	UHRF1	29128
hsa-let-7a-5p	PAK1	5058
hsa-let-7a-5p	AURKB	9212
hsa-let-7a-5p	RAB40C	57799
hsa-let-7a-5p	ARG2	384
hsa-let-7a-5p	TNFRSF10B	8795
hsa-let-7a-5p	PARP1	142
hsa-let-7a-5p	PKM	5315
hsa-let-7a-5p	WNT1	7471
hsa-let-7a-5p	STAT3	6774
hsa-let-7a-5p	MAP4K4	9448
hsa-let-7a-5p	TNFAIP3	7128
hsa-let-7d-5p	TXLNG	55787
hsa-let-7d-5p	HIF1AN	55662
hsa-let-7d-5p	GPR26	2849
hsa-let-7d-5p	CD59	966
hsa-let-7d-5p	PRDM2	7799
hsa-let-7d-5p	TRMT10A	93587
hsa-let-7d-5p	ZBTB5	9925
hsa-let-7d-5p	SLC5A9	200010
hsa-let-7d-5p	USP38	84640
hsa-let-7d-5p	HMGA1	3159
hsa-let-7d-5p	ODF2L	57489
hsa-let-7d-5p	PTAFR	5724
hsa-let-7d-5p	CPM	1368
hsa-let-7d-5p	PGRMC1	10857
hsa-let-7d-5p	FNDC3A	22862
hsa-let-7d-5p	RGPD8	727851
hsa-let-7d-5p	ACP1	52
hsa-let-7d-5p	DPH3	285381
hsa-let-7d-5p	PUS7L	83448
hsa-let-7d-5p	SMARCAD1	56916
hsa-let-7d-5p	LPGAT1	9926
hsa-let-7d-5p	PPP1R15B	84919
hsa-let-7d-5p	MXD1	4084
hsa-let-7d-5p	RDX	5962
hsa-let-7d-5p	CLP1	10978
hsa-let-7d-5p	RUFY3	22902
hsa-let-7d-5p	RGPD6	729540
hsa-let-7d-5p	ATP6V1C1	528
hsa-let-7d-5p	RSPO2	340419
hsa-let-7d-5p	FOXP2	93986
hsa-let-7d-5p	MIB1	57534
hsa-let-7d-5p	SLC25A40	55972
hsa-let-7d-5p	HOXD1	3231
hsa-let-7d-5p	HMGA2	8091
hsa-let-7d-5p	IGF2BP1	10642
hsa-let-7d-5p	PLD5	200150
hsa-let-7d-5p	STARD9	57519
hsa-let-7d-5p	SLC20A1	6574
hsa-let-7d-5p	E2F5	1875
hsa-let-7d-5p	MGAT4A	11320
hsa-let-7d-5p	HIC2	23119
hsa-let-7d-5p	BCAT1	586
hsa-let-7d-5p	LIN28B	389421
hsa-let-7d-5p	GAS7	8522
hsa-let-7d-5p	SNX16	64089
hsa-let-7d-5p	CTPS2	56474
hsa-let-7d-5p	IGF1R	3480
hsa-let-7d-5p	PAPOLA	10914
hsa-let-7d-5p	NAP1L1	4673
hsa-let-7d-5p	IFT80	57560
hsa-let-7d-5p	TGFBR1	7046
hsa-let-7d-5p	DIP2A	23181
hsa-let-7d-5p	CLCN5	1184
hsa-let-7d-5p	KLHL31	401265
hsa-let-7d-5p	RGPD5	84220
hsa-let-7d-5p	DCLRE1B	64858
hsa-let-7d-5p	COL24A1	255631
hsa-let-7d-5p	VPS26B	112936
hsa-let-7d-5p	NEK3	4752
hsa-let-7d-5p	THRSP	7069
hsa-let-7d-5p	EDN1	1906
hsa-let-7d-5p	KHNYN	23351
hsa-let-7d-5p	BACE2	25825
hsa-let-7d-5p	POTEM	641455
hsa-let-7d-5p	TGFBR3	7049
hsa-let-7d-5p	ZCCHC9	84240
hsa-let-7d-5p	RMI2	116028
hsa-let-7d-5p	SRD5A3	79644
hsa-let-7d-5p	CELF3	11189
hsa-let-7d-5p	C3orf38	285237
hsa-let-7d-5p	C14orf28	122525
hsa-let-7d-5p	GAN	8139
hsa-let-7d-5p	FMO2	2327
hsa-let-7d-5p	UFL1	23376
hsa-let-7d-5p	E2F2	1870
hsa-let-7d-5p	TMPPE	643853
hsa-let-7d-5p	CYP4F2	8529
hsa-let-7d-5p	LRIG3	121227
hsa-let-7d-5p	LIMD2	80774
hsa-let-7d-5p	GALC	2581
hsa-let-7d-5p	RPUSD3	285367
hsa-let-7d-5p	HDX	139324
hsa-let-7d-5p	NOVA1	4857
hsa-let-7d-5p	MAP4K3	8491
hsa-let-7d-5p	SLC25A24	29957
hsa-let-7d-5p	SLC25A27	9481
hsa-let-7d-5p	FAM103A1	83640
hsa-let-7d-5p	NGF	4803
hsa-let-7d-5p	TMEM167A	153339
hsa-let-7d-5p	ARHGEF38	54848
hsa-let-7d-5p	COL14A1	7373
hsa-let-7d-5p	ABHD14B	84836
hsa-let-7d-5p	IQCB1	9657
hsa-let-7d-5p	UGT3A1	133688
hsa-let-7d-5p	STK40	83931
hsa-let-7d-5p	SPRYD7	57213
hsa-let-7d-5p	PBX3	5090
hsa-let-7d-5p	ZNF652	22834
hsa-let-7d-5p	VPS33A	65082
hsa-let-7d-5p	IGDCC3	9543
hsa-let-7d-5p	FAM178A	55719
hsa-let-7d-5p	PDPR	55066
hsa-let-7d-5p	UTRN	7402
hsa-let-7d-5p	CEP135	9662
hsa-let-7d-5p	RAB11FIP4	84440
hsa-let-7d-5p	PIGA	5277
hsa-let-7d-5p	RBM12B	389677
hsa-let-7d-5p	SPRYD4	283377
hsa-let-7d-5p	C12orf49	79794
hsa-let-7d-5p	FGD6	55785
hsa-let-7d-5p	YOD1	55432
hsa-let-7d-5p	GATM	2628
hsa-let-7d-5p	ZNF202	7753
hsa-let-7d-5p	ZNF341	84905
hsa-let-7d-5p	LRIG2	9860
hsa-let-7d-5p	PARD6B	84612
hsa-let-7d-5p	ZNF512B	57473
hsa-let-7d-5p	MASP1	5648
hsa-let-7d-5p	ABCC2	1244
hsa-let-7d-5p	PRTG	283659
hsa-let-7d-5p	MAPK6	5597
hsa-let-7d-5p	OPA3	80207
hsa-let-7d-5p	DICER1	23405
hsa-let-7d-5p	SLC11A2	4891
hsa-let-7d-5p	IL13	3596
hsa-let-7d-5p	AGO1	26523
hsa-let-7d-5p	TNFRSF10B	8795
hsa-let-7d-5p	COL3A1	1281
hsa-let-7d-5p	CRYGEP	200575
hsa-let-7e-5p	HDX	139324
hsa-let-7e-5p	PLA2G3	50487
hsa-let-7e-5p	DMD	1756
hsa-let-7e-5p	SMC1A	8243
hsa-let-7e-5p	IFT80	57560
hsa-let-7e-5p	NRAS	4893
hsa-let-7e-5p	RGPD8	727851
hsa-let-7e-5p	AMACR	23600
hsa-let-7e-5p	MED8	112950
hsa-let-7e-5p	A1CF	29974
hsa-let-7e-5p	C8orf58	541565
hsa-let-7e-5p	MED28	80306
hsa-let-7e-5p	MDM4	4194
hsa-let-7e-5p	GJC1	10052
hsa-let-7e-5p	THAP9	79725
hsa-let-7e-5p	COIL	8161
hsa-let-7e-5p	CD59	966
hsa-let-7e-5p	IGF2BP2	10644
hsa-let-7e-5p	TGFBR1	7046
hsa-let-7e-5p	YOD1	55432
hsa-let-7e-5p	CYP19A1	1588
hsa-let-7e-5p	CD200R1	131450
hsa-let-7e-5p	IFI44L	10964
hsa-let-7e-5p	ZCCHC9	84240
hsa-let-7e-5p	ZNF583	147949
hsa-let-7e-5p	CPA4	51200
hsa-let-7e-5p	GAS7	8522
hsa-let-7e-5p	CPEB1	64506
hsa-let-7e-5p	PBX3	5090
hsa-let-7e-5p	RGPD6	729540
hsa-let-7e-5p	LRIG3	121227
hsa-let-7e-5p	SYNC	81493
hsa-let-7e-5p	NAP1L1	4673
hsa-let-7e-5p	ABCC5	10057
hsa-let-7e-5p	DOK3	79930
hsa-let-7e-5p	MAP4K3	8491
hsa-let-7e-5p	PGRMC1	10857
hsa-let-7e-5p	TGFBR3	7049
hsa-let-7e-5p	HIF1AN	55662
hsa-let-7e-5p	DDX19B	11269
hsa-let-7e-5p	DDI2	84301
hsa-let-7e-5p	CCNJ	54619
hsa-let-7e-5p	PIGA	5277
hsa-let-7e-5p	AMT	275
hsa-let-7e-5p	TMEM2	23670
hsa-let-7e-5p	FAM103A1	83640
hsa-let-7e-5p	NEK3	4752
hsa-let-7e-5p	SERF2	10169
hsa-let-7e-5p	IKBKAP	8518
hsa-let-7e-5p	SLC35D2	11046
hsa-let-7e-5p	PAG1	55824
hsa-let-7e-5p	ACP1	52
hsa-let-7e-5p	EDN1	1906
hsa-let-7e-5p	PPAPDC1B	84513
hsa-let-7e-5p	SOCS4	122809
hsa-let-7e-5p	SLC5A9	200010
hsa-let-7e-5p	ARHGEF38	54848
hsa-let-7e-5p	MASP1	5648
hsa-let-7e-5p	DDTL	100037417
hsa-let-7e-5p	PPP1R15B	84919
hsa-let-7e-5p	OPA3	80207
hsa-let-7e-5p	ADAMTS8	11095
hsa-let-7e-5p	CTPS2	56474
hsa-let-7e-5p	GATM	2628
hsa-let-7e-5p	MFSD4	148808
hsa-let-7e-5p	PLEKHA8	84725
hsa-let-7e-5p	KIAA1429	25962
hsa-let-7e-5p	ACVR1C	130399
hsa-let-7e-5p	PRPF38B	55119
hsa-let-7e-5p	DNA2	1763
hsa-let-7e-5p	CYP4F2	8529
hsa-let-7e-5p	PTAFR	5724
hsa-let-7e-5p	GCNT4	51301
hsa-let-7e-5p	SIGLEC14	100049587
hsa-let-7e-5p	B3GNT7	93010
hsa-let-7e-5p	ZBP1	81030
hsa-let-7e-5p	CLDN12	9069
hsa-let-7e-5p	FRMD4B	23150
hsa-let-7e-5p	THRSP	7069
hsa-let-7e-5p	ADRB2	154
hsa-let-7e-5p	GPR26	2849
hsa-let-7e-5p	TMEM167A	153339
hsa-let-7e-5p	FNDC3A	22862
hsa-let-7e-5p	ZNF341	84905
hsa-let-7e-5p	PARS2	25973
hsa-let-7e-5p	MMS22L	253714
hsa-let-7e-5p	CRTAM	56253
hsa-let-7e-5p	TNFSF10	8743
hsa-let-7e-5p	TSEN34	79042
hsa-let-7e-5p	RDX	5962
hsa-let-7e-5p	NAA38	51691
hsa-let-7e-5p	FOXP2	93986
hsa-let-7e-5p	HAND1	9421
hsa-let-7e-5p	CLCN5	1184
hsa-let-7e-5p	KHNYN	23351
hsa-let-7e-5p	COL14A1	7373
hsa-let-7e-5p	CASP3	836
hsa-let-7e-5p	IGF1R	3480
hsa-let-7e-5p	PRTG	283659
hsa-let-7e-5p	SMIM3	85027
hsa-let-7e-5p	NPHP3	27031
hsa-let-7e-5p	KCTD21	283219
hsa-let-7e-5p	SPRYD7	57213
hsa-let-7e-5p	ERCC6	2074
hsa-let-7e-5p	SLC20A1	6574
hsa-let-7e-5p	ATP6V1C1	528
hsa-let-7e-5p	MAPK6	5597
hsa-let-7e-5p	UHRF2	115426
hsa-let-7e-5p	ATG10	83734
hsa-let-7e-5p	ONECUT2	9480
hsa-let-7e-5p	CBX5	23468
hsa-let-7e-5p	UTRN	7402
hsa-let-7e-5p	CDC34	997
hsa-let-7e-5p	MYO1F	4542
hsa-let-7e-5p	LIPT2	387787
hsa-let-7e-5p	HIC2	23119
hsa-let-7e-5p	SDR42E1	93517
hsa-let-7e-5p	SLC25A24	29957
hsa-let-7e-5p	RPUSD3	285367
hsa-let-7e-5p	MRS2	57380
hsa-let-7e-5p	ESR2	2100
hsa-let-7e-5p	ZNF322	79692
hsa-let-7e-5p	C14orf28	122525
hsa-let-7e-5p	IGF2BP1	10642
hsa-let-7e-5p	IGDCC3	9543
hsa-let-7e-5p	CPM	1368
hsa-let-7e-5p	ZFYVE26	23503
hsa-let-7e-5p	PRDM2	7799
hsa-let-7e-5p	PLEKHH1	57475
hsa-let-7e-5p	LIN28B	389421
hsa-let-7e-5p	EMB	133418
hsa-let-7e-5p	STARD9	57519
hsa-let-7e-5p	HOXA1	3198
hsa-let-7e-5p	LRIG2	9860
hsa-let-7e-5p	ZNF10	7556
hsa-let-7e-5p	PDPR	55066
hsa-let-7e-5p	IGF2BP3	10643
hsa-let-7e-5p	RGPD5	84220
hsa-let-7e-5p	AHCTF1	25909
hsa-let-7e-5p	FZD3	7976
hsa-let-7e-5p	COL3A1	1281
hsa-let-7e-5p	GDF6	392255
hsa-let-7e-5p	FIGNL2	401720
hsa-let-7e-5p	DCLRE1B	64858
hsa-let-7e-5p	KCNJ11	3767
hsa-let-7e-5p	ZBTB5	9925
hsa-let-7e-5p	FIGN	55137
hsa-let-7e-5p	OLFM4	10562
hsa-let-7e-5p	HMGA2	8091
hsa-let-7e-5p	NGF	4803
hsa-let-7e-5p	POTEM	641455
hsa-let-7e-5p	PLEKHG7	440107
hsa-let-7e-5p	SRD5A3	79644
hsa-let-7e-5p	LPGAT1	9926
hsa-let-7e-5p	GAN	8139
hsa-let-7e-5p	RPL36A	6173
hsa-let-7e-5p	DDX19A	55308
hsa-let-7e-5p	TRIM71	131405
hsa-let-7e-5p	SUB1	10923
hsa-let-7e-5p	WNT1	7471
hsa-let-7e-5p	CCND1	595
hsa-let-7e-5p	MYCN	4613
hsa-let-7e-5p	AGO1	26523
hsa-let-7e-5p	MMP9	4318
hsa-let-7e-5p	IGF1	3479
hsa-let-7e-5p	LIN28A	79727
hsa-let-7e-5p	AURKB	9212
hsa-let-7e-5p	EZH2	2146
hsa-let-7e-5p	TNFRSF10B	8795
hsa-let-7e-5p	ARID3A	1820
hsa-let-7e-5p	FASLG	356
hsa-let-7e-5p	PLK1	5347
hsa-let-7e-5p	TNFAIP3	7128
hsa-let-7f-5p	ACVR1C	130399
hsa-let-7f-5p	ANKRD49	54851
hsa-let-7f-5p	PTAFR	5724
hsa-let-7f-5p	SMARCAD1	56916
hsa-let-7f-5p	NRAS	4893
hsa-let-7f-5p	AMT	275
hsa-let-7f-5p	IGF2BP2	10644
hsa-let-7f-5p	ZCCHC9	84240
hsa-let-7f-5p	AMACR	23600
hsa-let-7f-5p	MMS22L	253714
hsa-let-7f-5p	SMIM3	85027
hsa-let-7f-5p	PRDM2	7799
hsa-let-7f-5p	CPEB1	64506
hsa-let-7f-5p	MAP4K3	8491
hsa-let-7f-5p	CD59	966
hsa-let-7f-5p	SLC35D2	11046
hsa-let-7f-5p	DMD	1756
hsa-let-7f-5p	EDN1	1906
hsa-let-7f-5p	CCNJ	54619
hsa-let-7f-5p	COL1A2	1278
hsa-let-7f-5p	PRTG	283659
hsa-let-7f-5p	LPGAT1	9926
hsa-let-7f-5p	DOK3	79930
hsa-let-7f-5p	PRPF38B	55119
hsa-let-7f-5p	PBX3	5090
hsa-let-7f-5p	SUB1	10923
hsa-let-7f-5p	DDI2	84301
hsa-let-7f-5p	KCTD21	283219
hsa-let-7f-5p	UHRF2	115426
hsa-let-7f-5p	GAS7	8522
hsa-let-7f-5p	ADAMTS8	11095
hsa-let-7f-5p	ERCC6	2074
hsa-let-7f-5p	PDPR	55066
hsa-let-7f-5p	COL3A1	1281
hsa-let-7f-5p	RSPO2	340419
hsa-let-7f-5p	GJC1	10052
hsa-let-7f-5p	OPA3	80207
hsa-let-7f-5p	FAM178A	55719
hsa-let-7f-5p	ENTPD7	57089
hsa-let-7f-5p	PIGA	5277
hsa-let-7f-5p	DDX19B	11269
hsa-let-7f-5p	PPAPDC1B	84513
hsa-let-7f-5p	TMEM2	23670
hsa-let-7f-5p	C3orf38	285237
hsa-let-7f-5p	C14orf28	122525
hsa-let-7f-5p	FZD3	7976
hsa-let-7f-5p	HAND1	9421
hsa-let-7f-5p	CLCN5	1184
hsa-let-7f-5p	FRMD4B	23150
hsa-let-7f-5p	ESR2	2100
hsa-let-7f-5p	FIGN	55137
hsa-let-7f-5p	LIPT2	387787
hsa-let-7f-5p	ABCC5	10057
hsa-let-7f-5p	ZBP1	81030
hsa-let-7f-5p	CD200R1	131450
hsa-let-7f-5p	RFX5	5993
hsa-let-7f-5p	SPRYD7	57213
hsa-let-7f-5p	MASP1	5648
hsa-let-7f-5p	ATP6V1C1	528
hsa-let-7f-5p	PLEKHA8	84725
hsa-let-7f-5p	FIGNL2	401720
hsa-let-7f-5p	SOCS4	122809
hsa-let-7f-5p	HMGA2	8091
hsa-let-7f-5p	ONECUT2	9480
hsa-let-7f-5p	KHNYN	23351
hsa-let-7f-5p	HOXA1	3198
hsa-let-7f-5p	DDX19A	55308
hsa-let-7f-5p	LIN28B	389421
hsa-let-7f-5p	SERF2	10169
hsa-let-7f-5p	SYNC	81493
hsa-let-7f-5p	EMB	133418
hsa-let-7f-5p	ODF2L	57489
hsa-let-7f-5p	CASP3	836
hsa-let-7f-5p	ZNF341	84905
hsa-let-7f-5p	KIAA1429	25962
hsa-let-7f-5p	PLEKHG7	440107
hsa-let-7f-5p	SMC1A	8243
hsa-let-7f-5p	SRD5A3	79644
hsa-let-7f-5p	IGDCC3	9543
hsa-let-7f-5p	ABCC2	1244
hsa-let-7f-5p	CBX5	23468
hsa-let-7f-5p	NAP1L1	4673
hsa-let-7f-5p	YOD1	55432
hsa-let-7f-5p	GATM	2628
hsa-let-7f-5p	GDF6	392255
hsa-let-7f-5p	HDX	139324
hsa-let-7f-5p	MRS2	57380
hsa-let-7f-5p	RPL36A	6173
hsa-let-7f-5p	RDX	5962
hsa-let-7f-5p	FNDC3A	22862
hsa-let-7f-5p	SDR42E1	93517
hsa-let-7f-5p	PARS2	25973
hsa-let-7f-5p	C8orf58	541565
hsa-let-7f-5p	ACP1	52
hsa-let-7f-5p	TRIM71	131405
hsa-let-7f-5p	ZNF322	79692
hsa-let-7f-5p	TTLL4	9654
hsa-let-7f-5p	AHCTF1	25909
hsa-let-7f-5p	NEK3	4752
hsa-let-7f-5p	HIF1AN	55662
hsa-let-7f-5p	GPR26	2849
hsa-let-7f-5p	ATG10	83734
hsa-let-7f-5p	STARD9	57519
hsa-let-7f-5p	TGFBR1	7046
hsa-let-7f-5p	IFT80	57560
hsa-let-7f-5p	MED8	112950
hsa-let-7f-5p	NPHP3	27031
hsa-let-7f-5p	PLA2G3	50487
hsa-let-7f-5p	CRTAM	56253
hsa-let-7f-5p	IGF1R	3480
hsa-let-7f-5p	POTEM	641455
hsa-let-7f-5p	LRIG3	121227
hsa-let-7f-5p	ZNF583	147949
hsa-let-7f-5p	SNX16	64089
hsa-let-7f-5p	TGFBR3	7049
hsa-let-7f-5p	THRSP	7069
hsa-let-7f-5p	HIC2	23119
hsa-let-7f-5p	CPA4	51200
hsa-let-7f-5p	DDTL	100037417
hsa-let-7f-5p	ADRB2	154
hsa-let-7f-5p	OLFM4	10562
hsa-let-7f-5p	CTPS2	56474
hsa-let-7f-5p	RGPD8	727851
hsa-let-7f-5p	RGPD5	84220
hsa-let-7f-5p	LIN28A	79727
hsa-let-7f-5p	GCNT4	51301
hsa-let-7f-5p	SIGLEC14	100049587
hsa-let-7f-5p	CYP4F2	8529
hsa-let-7f-5p	IGF2BP1	10642
hsa-let-7f-5p	RGPD6	729540
hsa-let-7f-5p	SLC5A9	200010
hsa-let-7f-5p	MED28	80306
hsa-let-7f-5p	GAN	8139
hsa-let-7f-5p	NAA38	51691
hsa-let-7f-5p	CDC34	997
hsa-let-7f-5p	MFSD4	148808
hsa-let-7f-5p	TNFSF10	8743
hsa-let-7f-5p	THAP9	79725
hsa-let-7f-5p	ARHGEF38	54848
hsa-let-7f-5p	MAPK6	5597
hsa-let-7f-5p	NGF	4803
hsa-let-7f-5p	IGF2BP3	10643
hsa-let-7f-5p	PPP1R15B	84919
hsa-let-7f-5p	COL14A1	7373
hsa-let-7f-5p	COIL	8161
hsa-let-7f-5p	DNA2	1763
hsa-let-7f-5p	TMEM167A	153339
hsa-let-7f-5p	LRIG2	9860
hsa-let-7f-5p	PGRMC1	10857
hsa-let-7f-5p	KLK10	5655
hsa-let-7f-5p	KLK6	5653
hsa-let-7f-5p	PRDM1	639
hsa-let-7f-5p	IL13	3596
hsa-let-7f-5p	CYP19A1	1588
hsa-let-7f-5p	COPS8	10920
hsa-let-7f-5p	GPS1	2873
hsa-let-7f-5p	CCND1	595
hsa-let-7f-5p	COPS6	10980
hsa-let-7f-5p	MYH9	4627
hsa-let-7f-5p	SOCS3	9021
hsa-let-7f-5p	ELF4	2000
hsa-let-7f-5p	DYRK2	8445
hsa-let-7f-5p	CCL7	6354
hsa-let-7f-5p	AGO1	26523
hsa-let-7f-5p	IL6	3569
hsa-let-7f-5p	POSTN	10631
hsa-miR-1270	SUN2	25777
hsa-miR-1270	UNC45B	146862
hsa-miR-1270	NLGN4Y	22829
hsa-miR-1270	GPC5	2262
hsa-miR-1270	TCF20	6942
hsa-miR-1270	KIAA1467	57613
hsa-miR-1270	SPINK8	646424
hsa-miR-1270	GALNT2	2590
hsa-miR-1270	CCDC117	150275
hsa-miR-1270	PPARD	5467
hsa-miR-1270	LMTK2	22853
hsa-miR-1270	PDE11A	50940
hsa-miR-1270	TUBB	203068
hsa-miR-1270	KLRF1	51348
hsa-miR-1270	NR3C1	2908
hsa-miR-1270	ANGPTL1	9068
hsa-miR-1270	CSRNP3	80034
hsa-miR-1270	PPP3R1	5534
hsa-miR-1270	ARNT	405
hsa-miR-1270	PSMA5	5686
hsa-miR-1270	CLCN3	1182
hsa-miR-1270	RNF6	6049
hsa-miR-1270	TMLHE	55217
hsa-miR-1270	ZNF621	285268
hsa-miR-1270	ARRB1	408
hsa-miR-1270	PBOV1	59351
hsa-miR-1270	MYO1B	4430
hsa-miR-1270	SV2B	9899
hsa-miR-1270	ZNF587	84914
hsa-miR-1270	KMO	8564
hsa-miR-1270	CACNB2	783
hsa-miR-1270	ZNF548	147694
hsa-miR-1270	ZNF652	22834
hsa-miR-1270	FXN	2395
hsa-miR-1270	CORO2A	7464
hsa-miR-1270	PRDM15	63977
hsa-miR-1270	TMEM183B	653659
hsa-miR-1270	GOLGA1	2800
hsa-miR-1270	DCP2	167227
hsa-miR-1270	MON2	23041
hsa-miR-1270	PSMB2	5690
hsa-miR-1270	UBN2	254048
hsa-miR-1270	FAM8A1	51439
hsa-miR-1270	COPS2	9318
hsa-miR-1270	ORAI2	80228
hsa-miR-1270	SOX6	55553
hsa-miR-1270	CYP4V2	285440
hsa-miR-1270	PCYOX1L	78991
hsa-miR-1270	SLC23A2	9962
hsa-miR-1270	STC2	8614
hsa-miR-1270	POU2F3	25833
hsa-miR-1270	KDM2A	22992
hsa-miR-1270	ZNF195	7748
hsa-miR-1270	RGS18	64407
hsa-miR-1270	ZBTB8B	728116
hsa-miR-1270	GPR26	2849
hsa-miR-1270	CERS3	204219
hsa-miR-1270	KIF1B	23095
hsa-miR-1270	RNF169	254225
hsa-miR-1270	CCSER2	54462
hsa-miR-1270	MED17	9440
hsa-miR-1270	SDC4	6385
hsa-miR-1270	SET	6418
hsa-miR-1270	IRF2BP2	359948
hsa-miR-1270	CTSE	1510
hsa-miR-1270	SAP130	79595
hsa-miR-1270	NSF	4905
hsa-miR-1270	PTPRT	11122
hsa-miR-1270	MTG1	92170
hsa-miR-1270	ADAM19	8728
hsa-miR-1270	NSL1	25936
hsa-miR-1270	TMEM167A	153339
hsa-miR-1270	PHF8	23133
hsa-miR-1270	GAB1	2549
hsa-miR-1270	ALDH8A1	64577
hsa-miR-1270	SHISA9	729993
hsa-miR-1270	SENP5	205564
hsa-miR-1270	MEMO1	51072
hsa-miR-1270	STEAP2	261729
hsa-miR-1270	FAM105A	54491
hsa-miR-1270	RASAL2	9462
hsa-miR-1270	LRRC27	80313
hsa-miR-1270	SELE	6401
hsa-miR-1270	ASPH	444
hsa-miR-1270	SHISA6	388336
hsa-miR-1270	DAZ1	1617
hsa-miR-1270	SRD5A3	79644
hsa-miR-1270	NUP98	4928
hsa-miR-1270	POLI	11201
hsa-miR-1270	TMEM183A	92703
hsa-miR-1270	CLVS1	157807
hsa-miR-1270	ZCCHC14	23174
hsa-miR-1270	HAS1	3036
hsa-miR-1270	PPP2R5A	5525
hsa-miR-1270	ABCD4	5826
hsa-miR-1270	LITAF	9516
hsa-miR-1270	DAZL	1618
hsa-miR-1270	DAZ2	57055
hsa-miR-1270	GRHL2	79977
hsa-miR-1270	RASSF8	11228
hsa-miR-1270	TC2N	123036
hsa-miR-1270	REXO2	25996
hsa-miR-1270	OR7D2	162998
hsa-miR-1270	UBXN4	23190
hsa-miR-1270	GLI2	2736
hsa-miR-1270	INHBC	3626
hsa-miR-1270	GXYLT1	283464
hsa-miR-1270	MAPK10	5602
hsa-miR-1270	FAM189A1	23359
hsa-miR-1270	CAPZA1	829
hsa-miR-1270	RAP2B	5912
hsa-miR-1270	ABHD5	51099
hsa-miR-1270	MED29	55588
hsa-miR-1270	CSRNP2	81566
hsa-miR-1270	SLC1A1	6505
hsa-miR-1270	ATRX	546
hsa-miR-1270	DPH2	1802
hsa-miR-1270	SPTBN1	6711
hsa-miR-1270	ZNF470	388566
hsa-miR-1270	PCDH7	5099
hsa-miR-1270	PTPN18	26469
hsa-miR-1270	DENND2C	163259
hsa-miR-1270	DICER1	23405
hsa-miR-1270	GLI3	2737
hsa-miR-1270	ATP13A3	79572
hsa-miR-1270	KPNA4	3840
hsa-miR-1270	NUDCD3	23386
hsa-miR-1270	CD1A	909
hsa-miR-1270	RFC5	5985
hsa-miR-1270	NAA38	51691
hsa-miR-1270	UBFD1	56061
hsa-miR-1270	MINPP1	9562
hsa-miR-1270	FAHD1	81889
hsa-miR-1270	SNTB2	6645
hsa-miR-1270	CIR1	9541
hsa-miR-1270	DSC2	1824
hsa-miR-1270	STK4	6789
hsa-miR-1270	PRR23C	389152
hsa-miR-1270	JHDM1D	80853
hsa-miR-1270	C15orf40	123207
hsa-miR-1270	TOR1AIP2	163590
hsa-miR-1270	LYZ	4069
hsa-miR-1270	RABL3	285282
hsa-miR-1270	CD28	940
hsa-miR-1270	MARCH5	54708
hsa-miR-1270	DAZ3	57054
hsa-miR-1270	PCDH11Y	83259
hsa-miR-1270	UBE2B	7320
hsa-miR-1270	ERBB4	2066
hsa-miR-1270	SULT2A1	6822
hsa-miR-1270	DAZ4	57135
hsa-miR-1270	SAMD5	389432
hsa-miR-1270	MEGF9	1955
hsa-miR-1270	CDK17	5128
hsa-miR-1270	LAMB4	22798
hsa-miR-1270	APOOL	139322
hsa-miR-1270	EIF2AK1	27102
hsa-miR-1270	GLRA3	8001
hsa-miR-1270	SH3TC2	79628
hsa-miR-1270	CAPRIN1	4076
hsa-miR-1270	FLRT3	23767
hsa-miR-1270	VPS13C	54832
hsa-miR-1270	KSR2	283455
hsa-miR-1270	ZNFX1	57169
hsa-miR-1270	HEXA	3073
hsa-miR-1270	UBE2G1	7326
hsa-miR-1270	BCDIN3D	144233
hsa-miR-1270	GCFC2	6936
hsa-miR-1270	ZNF705A	440077
hsa-miR-1270	ELK4	2005
hsa-miR-1270	PGR	5241
hsa-miR-1270	PCDH11X	27328
hsa-miR-1270	PIKFYVE	200576
hsa-miR-1270	ITGA10	8515
hsa-miR-1270	RNF122	79845
hsa-miR-1270	ADCY2	108
hsa-miR-1270	MIB1	57534
hsa-miR-1270	LEP	3952
hsa-miR-1270	SETDB1	9869
hsa-miR-1270	UTP23	84294
hsa-miR-1270	FKTN	2218
hsa-miR-1270	RALGAPA2	57186
hsa-miR-1270	ZNF704	619279
hsa-miR-1270	JMY	133746
hsa-miR-1270	OLA1	29789
hsa-miR-1270	B3GALT2	8707
hsa-miR-1270	OBFC1	79991
hsa-miR-1270	SAMD12	401474
hsa-miR-1270	PDPR	55066
hsa-miR-1270	FAM102B	284611
hsa-miR-1270	NEUROD4	58158
hsa-miR-1270	ADO	84890
hsa-miR-132-3p	WT1	7490
hsa-miR-132-3p	NTNG1	22854
hsa-miR-132-3p	PSMD1	5707
hsa-miR-132-3p	TMEM106B	54664
hsa-miR-132-3p	SAP30L	79685
hsa-miR-132-3p	TMEM136	219902
hsa-miR-132-3p	ESRRG	2104
hsa-miR-132-3p	PSMA5	5686
hsa-miR-132-3p	NREP	9315
hsa-miR-132-3p	WDR5B	54554
hsa-miR-132-3p	REPS2	9185
hsa-miR-132-3p	TMEM64	169200
hsa-miR-132-3p	ARID1B	57492
hsa-miR-132-3p	TJAP1	93643
hsa-miR-132-3p	AHCY	191
hsa-miR-132-3p	NFE2L2	4780
hsa-miR-132-3p	PCDH15	65217
hsa-miR-132-3p	TSHZ2	128553
hsa-miR-132-3p	CALU	813
hsa-miR-132-3p	ORC4	5000
hsa-miR-132-3p	USP9X	8239
hsa-miR-132-3p	SIRT1	23411
hsa-miR-132-3p	SLC15A2	6565
hsa-miR-132-3p	NCALD	83988
hsa-miR-132-3p	PTAR1	375743
hsa-miR-132-3p	GRSF1	2926
hsa-miR-132-3p	SCN3A	6328
hsa-miR-132-3p	MELK	9833
hsa-miR-132-3p	MTF2	22823
hsa-miR-132-3p	TK2	7084
hsa-miR-132-3p	HBS1L	10767
hsa-miR-132-3p	NAB1	4664
hsa-miR-132-3p	ARMC8	25852
hsa-miR-132-3p	MFSD11	79157
hsa-miR-132-3p	DHFR	1719
hsa-miR-132-3p	PGR	5241
hsa-miR-132-3p	LRRFIP1	9208
hsa-miR-132-3p	AGO1	26523
hsa-miR-132-3p	FXR1	8087
hsa-miR-132-3p	HAVCR2	84868
hsa-miR-132-3p	ZNF605	100289635
hsa-miR-132-3p	LYN	4067
hsa-miR-132-3p	SREBF1	6720
hsa-miR-132-3p	EP300	2033
hsa-miR-132-3p	DAAM1	23002
hsa-miR-132-3p	PSMD12	5718
hsa-miR-132-3p	ELOVL2	54898
hsa-miR-132-3p	GAL3ST4	79690
hsa-miR-132-3p	MPEG1	219972
hsa-miR-132-3p	ZNF516	9658
hsa-miR-132-3p	ARID2	196528
hsa-miR-132-3p	EPB41L5	57669
hsa-miR-132-3p	C22orf39	128977
hsa-miR-132-3p	SEC14L2	23541
hsa-miR-132-3p	SNRPB2	6629
hsa-miR-132-3p	DNAJB14	79982
hsa-miR-132-3p	LEKR1	389170
hsa-miR-132-3p	GTF2H1	2965
hsa-miR-132-3p	SV2B	9899
hsa-miR-132-3p	ENPP4	22875
hsa-miR-132-3p	TSPAN6	7105
hsa-miR-132-3p	NFIA	4774
hsa-miR-132-3p	TMEM87A	25963
hsa-miR-132-3p	DHFRL1	200895
hsa-miR-132-3p	DPYSL3	1809
hsa-miR-132-3p	PLP1	5354
hsa-miR-132-3p	ACAD9	28976
hsa-miR-132-3p	GDF5	8200
hsa-miR-132-3p	SLC26A7	115111
hsa-miR-132-3p	ZNF566	84924
hsa-miR-132-3p	CCDC179	100500938
hsa-miR-132-3p	MAOA	4128
hsa-miR-132-3p	SRP72	6731
hsa-miR-132-3p	FBXO21	23014
hsa-miR-132-3p	PEX2	5828
hsa-miR-132-3p	MED9	55090
hsa-miR-132-3p	CLMN	79789
hsa-miR-132-3p	SPATA13	221178
hsa-miR-132-3p	TRIM44	54765
hsa-miR-132-3p	ARHGAP32	9743
hsa-miR-132-3p	CC2D1B	200014
hsa-miR-132-3p	AMD1	262
hsa-miR-132-3p	DCBLD2	131566
hsa-miR-132-3p	SMC1A	8243
hsa-miR-132-3p	SOX5	6660
hsa-miR-132-3p	C2orf44	80304
hsa-miR-132-3p	FAM150A	389658
hsa-miR-132-3p	GUCY1A3	2982
hsa-miR-132-3p	SLC6A1	6529
hsa-miR-132-3p	CFL2	1073
hsa-miR-132-3p	EFR3B	22979
hsa-miR-132-3p	NR2C2	7182
hsa-miR-132-3p	FRS2	10818
hsa-miR-132-3p	NFYA	4800
hsa-miR-132-3p	TIMM9	26520
hsa-miR-132-3p	EDNRA	1909
hsa-miR-132-3p	FTSJ2	29960
hsa-miR-132-3p	USP9Y	8287
hsa-miR-132-3p	PIK3AP1	118788
hsa-miR-132-3p	LOC100507462	100507462
hsa-miR-132-3p	MEIS2	4212
hsa-miR-132-3p	TGFB2	7042
hsa-miR-132-3p	FOXO3	2309
hsa-miR-132-3p	RAD21	5885
hsa-miR-132-3p	MUC13	56667
hsa-miR-132-3p	CBLL1	79872
hsa-miR-132-3p	BNC2	54796
hsa-miR-132-3p	DAZAP2	9802
hsa-miR-132-3p	NEIL2	252969
hsa-miR-132-3p	SEMA4G	57715
hsa-miR-132-3p	APAF1	317
hsa-miR-132-3p	NDUFAF6	137682
hsa-miR-132-3p	DYRK2	8445
hsa-miR-132-3p	LEMD3	23592
hsa-miR-132-3p	SOX11	6664
hsa-miR-132-3p	YIPF5	81555
hsa-miR-132-3p	METTL10	399818
hsa-miR-132-3p	SLC6A2	6530
hsa-miR-132-3p	COL5A2	1290
hsa-miR-132-3p	SRGAP3	9901
hsa-miR-132-3p	NMNAT2	23057
hsa-miR-132-3p	TTK	7272
hsa-miR-132-3p	PHF20L1	51105
hsa-miR-132-3p	C9orf72	203228
hsa-miR-132-3p	PPP2R5C	5527
hsa-miR-132-3p	EFEMP2	30008
hsa-miR-132-3p	SPPL3	121665
hsa-miR-132-3p	C8orf44-SGK3	100533105
hsa-miR-132-3p	NOVA1	4857
hsa-miR-132-3p	RASA1	5921
hsa-miR-132-3p	KCMF1	56888
hsa-miR-132-3p	ACP1	52
hsa-miR-132-3p	DDX23	9416
hsa-miR-132-3p	SETD5	55209
hsa-miR-132-3p	EPM2AIP1	9852
hsa-miR-132-3p	MAGI3	260425
hsa-miR-132-3p	NACC2	138151
hsa-miR-132-3p	PAM	5066
hsa-miR-132-3p	CUL4B	8450
hsa-miR-132-3p	SGK3	23678
hsa-miR-132-3p	TCF15	6939
hsa-miR-132-3p	METTL25	84190
hsa-miR-132-3p	RGS7BP	401190
hsa-miR-132-3p	COL11A1	1301
hsa-miR-132-3p	ACTR2	10097
hsa-miR-132-3p	CDK19	23097
hsa-miR-132-3p	RPP14	11102
hsa-miR-132-3p	GOLM1	51280
hsa-miR-132-3p	SEPSECS	51091
hsa-miR-132-3p	TC2N	123036
hsa-miR-132-3p	CSDE1	7812
hsa-miR-132-3p	MYCBP2	23077
hsa-miR-132-3p	RIT1	6016
hsa-miR-132-3p	PTBP2	58155
hsa-miR-132-3p	SCAMP1	9522
hsa-miR-132-3p	MCOLN3	55283
hsa-miR-132-3p	FAM126B	285172
hsa-miR-132-3p	HHIP	64399
hsa-miR-132-3p	CYP2U1	113612
hsa-miR-132-3p	FBXO28	23219
hsa-miR-132-3p	EIF5AL1	143244
hsa-miR-132-3p	DDO	8528
hsa-miR-132-3p	HIRA	7290
hsa-miR-132-3p	USP38	84640
hsa-miR-132-3p	COA5	493753
hsa-miR-132-3p	DYNC1LI2	1783
hsa-miR-132-3p	TGFBI	7045
hsa-miR-132-3p	UBE2G2	7327
hsa-miR-132-3p	PGM5	5239
hsa-miR-132-3p	MEX3C	51320
hsa-miR-132-3p	DCAF10	79269
hsa-miR-132-3p	PAIP2	51247
hsa-miR-132-3p	FBXL20	84961
hsa-miR-132-3p	MMP8	4317
hsa-miR-132-3p	NVL	4931
hsa-miR-132-3p	SALL1	6299
hsa-miR-132-3p	PRDM15	63977
hsa-miR-132-3p	PLA2G12A	81579
hsa-miR-132-3p	ETNK1	55500
hsa-miR-132-3p	PIGK	10026
hsa-miR-132-3p	MIA3	375056
hsa-miR-132-3p	IQCH	64799
hsa-miR-132-3p	OSBPL8	114882
hsa-miR-132-3p	VPS13A	23230
hsa-miR-132-3p	MIPOL1	145282
hsa-miR-132-3p	PDE5A	8654
hsa-miR-132-3p	PANX1	24145
hsa-miR-132-3p	UPK1B	7348
hsa-miR-132-3p	INSM2	84684
hsa-miR-132-3p	ZNF704	619279
hsa-miR-132-3p	HEXB	3074
hsa-miR-132-3p	SOD2	6648
hsa-miR-132-3p	TIA1	7072
hsa-miR-132-3p	TRDN	10345
hsa-miR-132-3p	ZAK	51776
hsa-miR-132-3p	LRRC2	79442
hsa-miR-132-3p	FAM199X	139231
hsa-miR-132-3p	NDUFA5	4698
hsa-miR-132-3p	ARNT	405
hsa-miR-132-3p	SCN2A	6326
hsa-miR-132-3p	SUDS3	64426
hsa-miR-132-3p	FCRL4	83417
hsa-miR-132-3p	RPL31	6160
hsa-miR-132-3p	ANXA4	307
hsa-miR-132-3p	FEM1C	56929
hsa-miR-132-3p	TRIB1	10221
hsa-miR-132-3p	ANKRD34C	390616
hsa-miR-132-3p	GPBP1	65056
hsa-miR-132-3p	FOXA1	3169
hsa-miR-132-3p	BOLL	66037
hsa-miR-132-3p	VDAC2	7417
hsa-miR-132-3p	ABHD13	84945
hsa-miR-132-3p	CNTNAP3B	728577
hsa-miR-132-3p	KCNK2	3776
hsa-miR-132-3p	HBEGF	1839
hsa-miR-132-3p	CACNG2	10369
hsa-miR-132-3p	SIX4	51804
hsa-miR-132-3p	FAM184A	79632
hsa-miR-132-3p	PSMA2	5683
hsa-miR-132-3p	PBDC1	51260
hsa-miR-132-3p	PRPF4B	8899
hsa-miR-132-3p	FAM76B	143684
hsa-miR-132-3p	ELMSAN1	91748
hsa-miR-132-3p	CAMSAP2	23271
hsa-miR-132-3p	DNAL1	83544
hsa-miR-132-3p	EFCAB9	285588
hsa-miR-132-3p	NLN	57486
hsa-miR-132-3p	OLFM1	10439
hsa-miR-132-3p	MIS12	79003
hsa-miR-132-3p	CYLD	1540
hsa-miR-132-3p	PDE3A	5139
hsa-miR-132-3p	MTMR1	8776
hsa-miR-132-3p	ZNF236	7776
hsa-miR-132-3p	KRTAP4-1	85285
hsa-miR-132-3p	FAM172A	83989
hsa-miR-132-3p	CCDC169	728591
hsa-miR-132-3p	STAMBP	10617
hsa-miR-132-3p	PNN	5411
hsa-miR-132-3p	BRWD1	54014
hsa-miR-132-3p	SKAP2	8935
hsa-miR-132-3p	FAM91A1	157769
hsa-miR-132-3p	ALKBH8	91801
hsa-miR-132-3p	C8A	731
hsa-miR-132-3p	SRGAP2	23380
hsa-miR-132-3p	SLC2A1	6513
hsa-miR-132-3p	ZNF678	339500
hsa-miR-132-3p	GABRG1	2565
hsa-miR-132-3p	GLIPR1	11010
hsa-miR-132-3p	ACVR2B	93
hsa-miR-132-3p	KCNQ3	3786
hsa-miR-132-3p	ANKRD29	147463
hsa-miR-132-3p	DYRK4	8798
hsa-miR-132-3p	ZNF451	26036
hsa-miR-132-3p	CCDC34	91057
hsa-miR-132-3p	EIF2S3	1968
hsa-miR-132-3p	TRMT13	54482
hsa-miR-132-3p	SFMBT1	51460
hsa-miR-132-3p	DGKI	9162
hsa-miR-132-3p	PRICKLE2	166336
hsa-miR-132-3p	FANK1	92565
hsa-miR-132-3p	DCUN1D3	123879
hsa-miR-132-3p	SLC25A20	788
hsa-miR-132-3p	SLC7A1	6541
hsa-miR-132-3p	C22orf46	79640
hsa-miR-132-3p	SYT15	83849
hsa-miR-132-3p	FMN1	342184
hsa-miR-132-3p	GMFB	2764
hsa-miR-132-3p	TMEM50B	757
hsa-miR-132-3p	LAMC2	3918
hsa-miR-132-3p	ASF1A	25842
hsa-miR-132-3p	CBWD2	150472
hsa-miR-132-3p	VIT	5212
hsa-miR-132-3p	STAM	8027
hsa-miR-132-3p	EIF4A2	1974
hsa-miR-132-3p	CDKN1A	1026
hsa-miR-132-3p	RB1	5925
hsa-miR-132-3p	CRK	1398
hsa-miR-132-3p	TLN2	83660
hsa-miR-132-3p	SPRED1	161742
hsa-miR-132-3p	CCNA2	890
hsa-miR-132-3p	CCNB1	891
hsa-miR-132-3p	FOXO1	2308
hsa-miR-132-3p	BDNF	627
hsa-miR-132-3p	JPT1	51155
hsa-miR-132-3p	KLHL11	55175
hsa-miR-132-3p	MAPK1	5594
hsa-miR-132-3p	IRAK4	51135
hsa-miR-132-3p	EGFR	1956
hsa-miR-132-3p	RAF1	5894
hsa-miR-132-3p	SOX4	6659
hsa-miR-132-3p	SPRY1	10252
hsa-miR-132-3p	MMP9	4318
hsa-miR-132-3p	YY1AP1	55249
hsa-miR-132-3p	AGO2	27161
hsa-miR-132-3p	SOX6	55553
hsa-miR-132-3p	PIK3R3	8503
hsa-miR-132-3p	SMAD2	4087
hsa-miR-196a-5p	COL14A1	7373
hsa-miR-196a-5p	GATA6	2627
hsa-miR-196a-5p	NEDD4L	23327
hsa-miR-196a-5p	CD24	100133941
hsa-miR-196a-5p	TMX1	81542
hsa-miR-196a-5p	SRP9	6726
hsa-miR-196a-5p	CDC14A	8556
hsa-miR-196a-5p	LCOR	84458
hsa-miR-196a-5p	SORCS1	114815
hsa-miR-196a-5p	PAPOLA	10914
hsa-miR-196a-5p	P2RY1	5028
hsa-miR-196a-5p	CNOT7	29883
hsa-miR-196a-5p	NAALADL2	254827
hsa-miR-196a-5p	HDAC9	9734
hsa-miR-196a-5p	ZMYND11	10771
hsa-miR-196a-5p	ALDH1L2	160428
hsa-miR-196a-5p	DCDC2	51473
hsa-miR-196a-5p	RGL2	5863
hsa-miR-196a-5p	SNX16	64089
hsa-miR-196a-5p	HOXC8	3224
hsa-miR-196a-5p	EDNRB	1910
hsa-miR-196a-5p	VSNL1	7447
hsa-miR-196a-5p	HOXB6	3216
hsa-miR-196a-5p	MTRNR2L4	100463285
hsa-miR-196a-5p	TRMT1L	81627
hsa-miR-196a-5p	SULT2A1	6822
hsa-miR-196a-5p	CASK	8573
hsa-miR-196a-5p	ZNF670	93474
hsa-miR-196a-5p	ATF6	22926
hsa-miR-196a-5p	PBX1	5087
hsa-miR-196a-5p	MRPS7	51081
hsa-miR-196a-5p	RASSF3	283349
hsa-miR-196a-5p	ITPRIPL2	162073
hsa-miR-196a-5p	LRP1B	53353
hsa-miR-196a-5p	RPL35A	6165
hsa-miR-196a-5p	VPS33A	65082
hsa-miR-196a-5p	LGALS8	3964
hsa-miR-196a-5p	ZNF24	7572
hsa-miR-196a-5p	KCNJ2	3759
hsa-miR-196a-5p	PHOSPHO2-KLHL23	100526832
hsa-miR-196a-5p	GCFC2	6936
hsa-miR-196a-5p	DIP2A	23181
hsa-miR-196a-5p	PRTG	283659
hsa-miR-196a-5p	UGT2A1	10941
hsa-miR-196a-5p	DCP2	167227
hsa-miR-196a-5p	IFT57	55081
hsa-miR-196a-5p	RPL36A	6173
hsa-miR-196a-5p	ARSJ	79642
hsa-miR-196a-5p	MAP3K1	4214
hsa-miR-196a-5p	FZD3	7976
hsa-miR-196a-5p	LAMA4	3910
hsa-miR-196a-5p	PPP1R15B	84919
hsa-miR-196a-5p	TRMT10A	93587
hsa-miR-196a-5p	PARD3B	117583
hsa-miR-196a-5p	TSPAN12	23554
hsa-miR-196a-5p	PBX3	5090
hsa-miR-196a-5p	XAF1	54739
hsa-miR-196a-5p	DPY19L4	286148
hsa-miR-196a-5p	EPS15	2060
hsa-miR-196a-5p	RAVER2	55225
hsa-miR-196a-5p	SDCBP	6386
hsa-miR-196a-5p	DDHD1	80821
hsa-miR-196a-5p	NRAS	4893
hsa-miR-196a-5p	GAN	8139
hsa-miR-196a-5p	FAM19A5	25817
hsa-miR-196a-5p	NR2C2	7182
hsa-miR-196a-5p	SMC3	9126
hsa-miR-196a-5p	ARHGAP11A	9824
hsa-miR-196a-5p	LDOC1	23641
hsa-miR-196a-5p	PLD1	5337
hsa-miR-196a-5p	RSPO2	340419
hsa-miR-196a-5p	RTKN2	219790
hsa-miR-196a-5p	FGD6	55785
hsa-miR-196a-5p	ENTPD4	9583
hsa-miR-196a-5p	ATRNL1	26033
hsa-miR-196a-5p	TRPC3	7222
hsa-miR-196a-5p	ERI2	112479
hsa-miR-196a-5p	CEP350	9857
hsa-miR-196a-5p	TMEM245	23731
hsa-miR-196a-5p	ZNF280D	54816
hsa-miR-196a-5p	POLR3D	661
hsa-miR-196a-5p	NME9	347736
hsa-miR-196a-5p	PRKG1	5592
hsa-miR-196a-5p	ERG	2078
hsa-miR-196a-5p	MCM9	254394
hsa-miR-196a-5p	TRERF1	55809
hsa-miR-196a-5p	PPP6R2	9701
hsa-miR-196a-5p	ARL5A	26225
hsa-miR-196a-5p	EXOC8	149371
hsa-miR-196a-5p	TUB	7275
hsa-miR-196a-5p	LARP4	113251
hsa-miR-196a-5p	RNF10	9921
hsa-miR-196a-5p	PACRGL	133015
hsa-miR-196a-5p	PLN	5350
hsa-miR-196a-5p	PLCXD1	55344
hsa-miR-196a-5p	AQP4	361
hsa-miR-196a-5p	PTPRG	5793
hsa-miR-196a-5p	ELMOD2	255520
hsa-miR-196a-5p	CCDC47	57003
hsa-miR-196a-5p	LHFPL2	10184
hsa-miR-196a-5p	KLHL23	151230
hsa-miR-196a-5p	TYRP1	7306
hsa-miR-196a-5p	CLEC2B	9976
hsa-miR-196a-5p	SNX24	28966
hsa-miR-196a-5p	KLHL4	56062
hsa-miR-196a-5p	HOXA5	3202
hsa-miR-196a-5p	ROCK1	6093
hsa-miR-196a-5p	RBM12B	389677
hsa-miR-196a-5p	MRS2	57380
hsa-miR-196a-5p	FCRL4	83417
hsa-miR-196a-5p	SLC9A6	10479
hsa-miR-196a-5p	PRELID2	153768
hsa-miR-196a-5p	BCDIN3D	144233
hsa-miR-196a-5p	SCCPDH	51097
hsa-miR-196a-5p	MAPK9	5601
hsa-miR-196a-5p	BIRC6	57448
hsa-miR-196a-5p	HOXA7	3204
hsa-miR-196a-5p	AUH	549
hsa-miR-196a-5p	UGT2A2	574537
hsa-miR-196a-5p	SLC9A2	6549
hsa-miR-196a-5p	LONP2	83752
hsa-miR-196a-5p	EXOC5	10640
hsa-miR-196a-5p	LSAMP	4045
hsa-miR-196a-5p	PDE7B	27115
hsa-miR-196a-5p	SPRED1	161742
hsa-miR-196a-5p	HMGA2	8091
hsa-miR-196a-5p	RDH11	51109
hsa-miR-196a-5p	PTGER3	5733
hsa-miR-196a-5p	RBM26	64062
hsa-miR-196a-5p	HOXA9	3205
hsa-miR-196a-5p	CTBS	1486
hsa-miR-196a-5p	TSTD3	100130890
hsa-miR-196a-5p	PAPOLG	64895
hsa-miR-196a-5p	TKTL2	84076
hsa-miR-196a-5p	MRC1	4360
hsa-miR-196a-5p	NDUFAF4	29078
hsa-miR-196a-5p	THSD7A	221981
hsa-miR-196a-5p	PHF20	51230
hsa-miR-196a-5p	HOXB7	3217
hsa-miR-196a-5p	SPRR2C	6702
hsa-miR-196a-5p	S100A9	6280
hsa-miR-196a-5p	KRT5	3852
hsa-miR-196a-5p	ANXA1	301
hsa-miR-196a-5p	HOXB8	3218
hsa-miR-196a-5p	HOXD8	3234
hsa-miR-196a-5p	BACH1	571
hsa-miR-196a-5p	HMOX1	3162
hsa-miR-196a-5p	CDKN1B	1027
hsa-miR-196a-5p	HMGA1	3159
hsa-miR-196a-5p	FOXO1	2308
hsa-miR-196a-5p	NTN4	59277
hsa-miR-196a-5p	RDX	5962
hsa-miR-196a-5p	NFKBIA	4792
hsa-miR-196a-5p	TYMS	7298
hsa-miR-196a-5p	NRP2	8828
hsa-miR-196a-5p	LSP1	4046
hsa-miR-196a-5p	SSSCA1	10534
hsa-miR-196a-5p	HOXA10	3206
hsa-miR-196a-5p	TGFBR2	7048
hsa-miR-196a-5p	MAMDC2	256691
hsa-miR-196a-5p	ELOVL1	64834
hsa-miR-196a-5p	CDKN1A	1026
hsa-miR-23a-5p	TGM2	7052
hsa-miR-23a-5p	TMEM178B	100507421
hsa-miR-23a-5p	OSGEP	55644
hsa-miR-23a-5p	TEC	7006
hsa-miR-23a-5p	MCFD2	90411
hsa-miR-23a-5p	CTSC	1075
hsa-miR-23a-5p	NHS	4810
hsa-miR-23a-5p	TLR4	7099
hsa-miR-23a-5p	APITD1-CORT	100526739
hsa-miR-23a-5p	PLEKHH1	57475
hsa-miR-23a-5p	FZD5	7855
hsa-miR-23a-5p	GIPC3	126326
hsa-miR-23a-5p	EWSR1	2130
hsa-miR-23a-5p	P2RY2	5029
hsa-miR-23a-5p	USH2A	7399
hsa-miR-23a-5p	DYNLRB1	83658
hsa-miR-23a-5p	PTPRT	11122
hsa-miR-23a-5p	SIRPA	140885
hsa-miR-23a-5p	ZNF33B	7582
hsa-miR-23a-5p	CAPN1	823
hsa-miR-23a-5p	PSD2	84249
hsa-miR-23a-5p	LARP1	23367
hsa-miR-23a-5p	ZNF136	7695
hsa-miR-23a-5p	DOT1L	84444
hsa-miR-23a-5p	CLIP3	25999
hsa-miR-23a-5p	PDCD1	5133
hsa-miR-23a-5p	ZNF225	7768
hsa-miR-23a-5p	CHD4	1108
hsa-miR-23a-5p	TCEANC2	127428
hsa-miR-23a-5p	IGF2	3481
hsa-miR-23a-5p	XXYLT1	152002
hsa-miR-23a-5p	PIK3C2A	5286
hsa-miR-23a-5p	TP63	8626
hsa-miR-23a-5p	NRSN1	140767
hsa-miR-23a-5p	COMMD6	170622
hsa-miR-23a-5p	PYGB	5834
hsa-miR-23a-5p	FOXC1	2296
hsa-miR-23a-5p	BPIFC	254240
hsa-miR-23a-5p	REG1A	5967
hsa-miR-23a-5p	GPC6	10082
hsa-miR-23a-5p	MYO1E	4643
hsa-miR-23a-5p	CA6	765
hsa-miR-23a-5p	MYF6	4618
hsa-miR-23a-5p	SKI	6497
hsa-miR-23a-5p	MCOLN2	255231
hsa-miR-23a-5p	NTRK3	4916
hsa-miR-23a-5p	NDUFA10	4705
hsa-miR-23a-5p	STK3	6788
hsa-miR-23a-5p	FAM115C	285966
hsa-miR-23a-5p	SRSF2	6427
hsa-miR-23a-5p	APAF1	317
hsa-miR-23a-5p	LAMP1	3916
hsa-miR-23a-5p	GJA1	2697
hsa-miR-23a-5p	TGFB2	7042
hsa-miR-23a-5p	TLR2	7097
hsa-miR-432-5p	STAT2	6773
hsa-miR-432-5p	KIF2A	3796
hsa-miR-432-5p	SOCS5	9655
hsa-miR-432-5p	HSDL2	84263
hsa-miR-432-5p	C1orf21	81563
hsa-miR-432-5p	GMNC	647309
hsa-miR-432-5p	TCEB1	6921
hsa-miR-432-5p	SLC6A20	54716
hsa-miR-432-5p	TP53TG3C	653550
hsa-miR-432-5p	HHAT	55733
hsa-miR-432-5p	HHLA1	10086
hsa-miR-432-5p	NTRK2	4915
hsa-miR-432-5p	DNAJB6	10049
hsa-miR-432-5p	RBM33	155435
hsa-miR-432-5p	CRX	1406
hsa-miR-432-5p	CA12	771
hsa-miR-432-5p	NCOA3	8202
hsa-miR-432-5p	E2F3	1871
hsa-miR-432-5p	ARHGEF2	9181
hsa-miR-432-5p	EDA2R	60401
hsa-miR-432-5p	ZDHHC3	51304
hsa-miR-432-5p	SRSF1	6426
hsa-miR-432-5p	PAPOLA	10914
hsa-miR-432-5p	TP53TG3	24150
hsa-miR-432-5p	MILR1	284021
hsa-miR-432-5p	NEUROD1	4760
hsa-miR-432-5p	TLN1	7094
hsa-miR-432-5p	PDE4DIP	9659
hsa-miR-432-5p	SBF2	81846
hsa-miR-432-5p	ADAR	103
hsa-miR-432-5p	PTCD3	55037
hsa-miR-432-5p	MAN1A2	10905
hsa-miR-432-5p	PCSK2	5126
hsa-miR-432-5p	LANCL1	10314
hsa-miR-432-5p	PGBD4	161779
hsa-miR-432-5p	CYP1B1	1545
hsa-miR-432-5p	EIF4EBP2	1979
hsa-miR-432-5p	MRPS14	63931
hsa-miR-432-5p	CCSER2	54462
hsa-miR-432-5p	SH3BP2	6452
hsa-miR-432-5p	FAM107A	11170
hsa-miR-432-5p	HEATR5A	25938
hsa-miR-432-5p	KRTAP19-6	337973
hsa-miR-432-5p	PPP1R9A	55607
hsa-miR-432-5p	TP53TG3D	729264
hsa-miR-432-5p	TRPS1	7227
hsa-miR-432-5p	LPL	4023
hsa-miR-432-5p	UTP23	84294
hsa-miR-432-5p	CALN1	83698
hsa-miR-432-5p	ECHDC1	55862
hsa-miR-432-5p	NUDT21	11051
hsa-miR-432-5p	IDO2	169355
hsa-miR-432-5p	DLD	1738
hsa-miR-432-5p	CDKN2B	1030
hsa-miR-432-5p	F7	2155
hsa-miR-432-5p	TP53AIP1	63970
hsa-miR-432-5p	ZNF280C	55609
hsa-miR-432-5p	IKZF3	22806
hsa-miR-432-5p	AGO1	26523
hsa-miR-432-5p	C1orf174	339448
hsa-miR-432-5p	PDGFB	5155
hsa-miR-432-5p	TP53TG3B	729355
hsa-miR-432-5p	SLC39A7	7922
hsa-miR-432-5p	MLF1	4291
hsa-miR-432-5p	KIAA0232	9778
hsa-miR-432-5p	TP53RK	112858
hsa-miR-432-5p	ARNT	405
hsa-miR-432-5p	ARID5B	84159
hsa-miR-432-5p	TUBB	203068
hsa-miR-432-5p	COL4A5	1287
hsa-miR-432-5p	DCLK1	9201
hsa-miR-432-5p	SH3TC2	79628
hsa-miR-432-5p	HIF1AN	55662
hsa-miR-432-5p	OR2H1	26716
hsa-miR-432-5p	MTX3	345778
hsa-miR-432-5p	POLG	5428
hsa-miR-432-5p	TMEM242	729515
hsa-miR-432-5p	SDPR	8436
hsa-miR-432-5p	PWWP2A	114825
hsa-miR-432-5p	AXL	558
hsa-miR-432-5p	ATOH8	84913
hsa-miR-432-5p	KDM5C	8242
hsa-miR-432-5p	AGPAT4	56895
hsa-miR-432-5p	NRM	11270
hsa-miR-432-5p	SEMA4D	10507
hsa-miR-432-5p	AMER3	205147
hsa-miR-432-5p	PHC1	1911
hsa-miR-432-5p	GCSH	2653
hsa-miR-432-5p	ARMC7	79637
hsa-miR-432-5p	CCDC88A	55704
hsa-miR-432-5p	KLHL20	27252
hsa-miR-432-5p	PRKCB	5579
hsa-miR-432-5p	EIF4G3	8672
hsa-miR-432-5p	TBC1D5	9779
hsa-miR-432-5p	TMEM123	114908
hsa-miR-432-5p	BPGM	669
hsa-miR-432-5p	SPTY2D1	144108
hsa-miR-432-5p	RND3	390
hsa-miR-432-5p	CSNK1D	1453
hsa-miR-432-5p	PPAP2A	8611
hsa-miR-432-5p	LYRM2	57226
hsa-miR-432-5p	RAB2A	5862
hsa-miR-432-5p	CXCR6	10663
hsa-miR-432-5p	CELSR2	1952
hsa-miR-432-5p	FOXN2	3344
hsa-miR-432-5p	ARMC5	79798
hsa-miR-432-5p	FAM178A	55719
hsa-miR-432-5p	SLA	6503
hsa-miR-432-5p	SLC6A16	28968
hsa-miR-432-5p	RBM43	375287
hsa-miR-432-5p	CD83	9308
hsa-miR-432-5p	NUS1	116150
hsa-miR-432-5p	CA3	761
hsa-miR-432-5p	SLFN13	146857
hsa-miR-432-5p	ABHD6	57406
hsa-miR-432-5p	CARD8	22900
hsa-miR-432-5p	RASGRF1	5923
hsa-miR-432-5p	NFAT5	10725
hsa-miR-432-5p	EMP2	2013
hsa-miR-432-5p	KCNN3	3782
hsa-miR-432-5p	KCNIP3	30818
hsa-miR-432-5p	SOGA3	387104
hsa-miR-432-5p	ONECUT2	9480
hsa-miR-432-5p	DNAJC6	9829
hsa-miR-432-5p	ABHD15	116236
hsa-miR-432-5p	DEFB110	245913
hsa-miR-432-5p	CYBB	1536
hsa-miR-432-5p	HEG1	57493
hsa-miR-432-5p	WDFY3	23001
hsa-miR-432-5p	GNA12	2768
hsa-miR-432-5p	SCD	6319
hsa-miR-432-5p	QSER1	79832
hsa-miR-432-5p	TAOK1	57551
hsa-miR-432-5p	SPTBN1	6711
hsa-miR-432-5p	SBDS	51119
hsa-miR-432-5p	TEX19	400629
hsa-miR-432-5p	ZEB2	9839
hsa-miR-432-5p	SLCO6A1	133482
hsa-miR-432-5p	CDR2	1039
hsa-miR-432-5p	VGLL3	389136
hsa-miR-432-5p	ARSD	414
hsa-miR-432-5p	UCK2	7371
hsa-miR-432-5p	DDX11	1663
hsa-miR-432-5p	KIAA0368	23392
hsa-miR-432-5p	RFX3	5991
hsa-miR-432-5p	ARL5B	221079
hsa-miR-432-5p	GOSR2	9570
hsa-miR-432-5p	KLHL25	64410
hsa-miR-432-5p	RGS7BP	401190
hsa-miR-432-5p	NKX3-1	4824
hsa-miR-432-5p	TMEM199	147007
hsa-miR-432-5p	CCR7	1236
hsa-miR-432-5p	DBX2	440097
hsa-miR-432-5p	SLBP	7884
hsa-miR-432-5p	STX11	8676
hsa-miR-432-5p	TTC9	23508
hsa-miR-432-5p	CX3CL1	6376
hsa-miR-432-5p	KCTD2	23510
hsa-miR-432-5p	ZDHHC20	253832
hsa-miR-432-5p	KRT10	3858
hsa-miR-432-5p	SLC7A1	6541
hsa-miR-432-5p	FAM118B	79607
hsa-miR-432-5p	SPANXN1	494118
hsa-miR-432-5p	RHOBTB1	9886
hsa-miR-432-5p	NMT1	4836
hsa-miR-432-5p	KCTD7	154881
hsa-miR-432-5p	PLK3	1263
hsa-miR-432-5p	TNFRSF11A	8792
hsa-miR-432-5p	SECTM1	6398
hsa-miR-432-5p	CASP14	23581
hsa-miR-432-5p	MFSD8	256471
hsa-miR-432-5p	MYO1D	4642
hsa-miR-432-5p	MECP2	4204
hsa-miR-432-5p	RCOR1	23186
hsa-miR-432-5p	NES	10763
hsa-miR-493-5p	WNK3	65267
hsa-miR-493-5p	TPM3	7170
hsa-miR-493-5p	ENDOU	8909
hsa-miR-493-5p	COX11	1353
hsa-miR-493-5p	HMGCS1	3157
hsa-miR-493-5p	PURB	5814
hsa-miR-493-5p	HMGXB4	10042
hsa-miR-493-5p	UBXN10	127733
hsa-miR-493-5p	VSTM2B	342865
hsa-miR-493-5p	LIMCH1	22998
hsa-miR-493-5p	GP6	51206
hsa-miR-493-5p	PMP22	5376
hsa-miR-493-5p	SVIL	6840
hsa-miR-493-5p	GNB4	59345
hsa-miR-493-5p	LOC389831	389831
hsa-miR-493-5p	ABL2	27
hsa-miR-493-5p	WBP11	51729
hsa-miR-493-5p	GABRG2	2566
hsa-miR-493-5p	THOC2	57187
hsa-miR-493-5p	TCF4	6925
hsa-miR-493-5p	ZFAND5	7763
hsa-miR-493-5p	ASPH	444
hsa-miR-493-5p	ETV1	2115
hsa-miR-493-5p	KLK2	3817
hsa-miR-493-5p	EVI5	7813
hsa-miR-493-5p	KLHL13	90293
hsa-miR-493-5p	ZNF596	169270
hsa-miR-493-5p	CITED2	10370
hsa-miR-493-5p	TNFAIP8	25816
hsa-miR-493-5p	NDUFC2	4718
hsa-miR-493-5p	RREB1	6239
hsa-miR-493-5p	CTDSPL2	51496
hsa-miR-493-5p	C14orf28	122525
hsa-miR-493-5p	ZNF331	55422
hsa-miR-493-5p	NPR3	4883
hsa-miR-493-5p	SLC22A5	6584
hsa-miR-493-5p	XKR8	55113
hsa-miR-493-5p	SLC25A43	203427
hsa-miR-493-5p	BCL2	596
hsa-miR-493-5p	PCDHA12	56137
hsa-miR-493-5p	BAALC	79870
hsa-miR-493-5p	UGDH	7358
hsa-miR-493-5p	RASAL2	9462
hsa-miR-493-5p	CTNND1	1500
hsa-miR-493-5p	ITGB1	3688
hsa-miR-493-5p	SLC5A1	6523
hsa-miR-493-5p	SPINT2	10653
hsa-miR-493-5p	NCOA7	135112
hsa-miR-493-5p	RAP1GAP2	23108
hsa-miR-493-5p	PSMC2	5701
hsa-miR-493-5p	ACTR5	79913
hsa-miR-493-5p	ARHGEF38	54848
hsa-miR-493-5p	ZNF492	57615
hsa-miR-493-5p	TCF7L2	6934
hsa-miR-493-5p	ARID1A	8289
hsa-miR-493-5p	BCL7A	605
hsa-miR-493-5p	FMO2	2327
hsa-miR-493-5p	NAP1L1	4673
hsa-miR-493-5p	EEA1	8411
hsa-miR-493-5p	LARP4	113251
hsa-miR-493-5p	CADM2	253559
hsa-miR-493-5p	TRAF3IP2	10758
hsa-miR-493-5p	ERC2	26059
hsa-miR-493-5p	PIK3R1	5295
hsa-miR-493-5p	CYTH3	9265
hsa-miR-493-5p	FCHO2	115548
hsa-miR-493-5p	PROX2	283571
hsa-miR-493-5p	RASSF8	11228
hsa-miR-493-5p	DMGDH	29958
hsa-miR-493-5p	PDPK1	5170
hsa-miR-493-5p	SRPK2	6733
hsa-miR-493-5p	WWC3	55841
hsa-miR-493-5p	SAMD5	389432
hsa-miR-493-5p	PCDHA1	56147
hsa-miR-493-5p	HORMAD1	84072
hsa-miR-493-5p	ZNF43	7594
hsa-miR-493-5p	SCRN1	9805
hsa-miR-493-5p	SMAD9	4093
hsa-miR-493-5p	TMF1	7110
hsa-miR-493-5p	LRP11	84918
hsa-miR-493-5p	BTBD3	22903
hsa-miR-493-5p	ZNF385B	151126
hsa-miR-493-5p	RBM12	10137
hsa-miR-493-5p	ANKRD12	23253
hsa-miR-493-5p	MEF2C	4208
hsa-miR-493-5p	PTPN12	5782
hsa-miR-493-5p	AK5	26289
hsa-miR-493-5p	CNTNAP4	85445
hsa-miR-493-5p	SHQ1	55164
hsa-miR-493-5p	NPAS3	64067
hsa-miR-493-5p	TGFBR1	7046
hsa-miR-493-5p	TP63	8626
hsa-miR-493-5p	CACNB2	783
hsa-miR-493-5p	GATA2	2624
hsa-miR-493-5p	NUP133	55746
hsa-miR-493-5p	AACS	65985
hsa-miR-493-5p	CREB1	1385
hsa-miR-493-5p	NDST1	3340
hsa-miR-493-5p	RAB5A	5868
hsa-miR-493-5p	GJC1	10052
hsa-miR-493-5p	RFTN2	130132
hsa-miR-493-5p	ZNF879	345462
hsa-miR-493-5p	MZT1	440145
hsa-miR-493-5p	ADARB2	105
hsa-miR-493-5p	CDK12	51755
hsa-miR-493-5p	GAS1	2619
hsa-miR-493-5p	MTUS1	57509
hsa-miR-493-5p	KPNA4	3840
hsa-miR-493-5p	BTG2	7832
hsa-miR-493-5p	CRTAP	10491
hsa-miR-493-5p	RCHY1	25898
hsa-miR-493-5p	ZFR	51663
hsa-miR-493-5p	HSF5	124535
hsa-miR-493-5p	SMARCA2	6595
hsa-miR-493-5p	PRPF38B	55119
hsa-miR-493-5p	SMIM13	221710
hsa-miR-493-5p	PCDHA11	56138
hsa-miR-493-5p	ZNF696	79943
hsa-miR-493-5p	UCK2	7371
hsa-miR-493-5p	ZNF254	9534
hsa-miR-493-5p	SLC7A1	6541
hsa-miR-493-5p	CELF2	10659
hsa-miR-493-5p	PTCH1	5727
hsa-miR-493-5p	GRHL2	79977
hsa-miR-493-5p	BCOR	54880
hsa-miR-493-5p	FBRSL1	57666
hsa-miR-493-5p	LDLRAD4	753
hsa-miR-493-5p	GABRA1	2554
hsa-miR-493-5p	NELL2	4753
hsa-miR-493-5p	STK24	8428
hsa-miR-493-5p	TANC2	26115
hsa-miR-493-5p	GBP1	2633
hsa-miR-493-5p	NDST3	9348
hsa-miR-493-5p	RAB3IP	117177
hsa-miR-493-5p	ZNF615	284370
hsa-miR-493-5p	LRP12	29967
hsa-miR-493-5p	PEX13	5194
hsa-miR-493-5p	SS18	6760
hsa-miR-493-5p	PCDHA6	56142
hsa-miR-493-5p	GDF6	392255
hsa-miR-493-5p	DACH1	1602
hsa-miR-493-5p	FAR1	84188
hsa-miR-493-5p	ZNF91	7644
hsa-miR-493-5p	CTNND2	1501
hsa-miR-493-5p	TNFAIP6	7130
hsa-miR-493-5p	NUDCD1	84955
hsa-miR-493-5p	PCNX	22990
hsa-miR-493-5p	KIAA2026	158358
hsa-miR-493-5p	CAMSAP2	23271
hsa-miR-493-5p	ZBTB11	27107
hsa-miR-493-5p	EPT1	85465
hsa-miR-493-5p	SLC25A36	55186
hsa-miR-493-5p	TIA1	7072
hsa-miR-493-5p	MBNL3	55796
hsa-miR-493-5p	KCTD15	79047
hsa-miR-493-5p	NR2C2	7182
hsa-miR-493-5p	BTAF1	9044
hsa-miR-493-5p	IFRD1	3475
hsa-miR-493-5p	RAB27B	5874
hsa-miR-493-5p	ACTR1B	10120
hsa-miR-493-5p	NUDT16	131870
hsa-miR-493-5p	MTX3	345778
hsa-miR-493-5p	GOLM1	51280
hsa-miR-493-5p	PPP2R5D	5528
hsa-miR-493-5p	VAMP2	6844
hsa-miR-493-5p	NECAB1	64168
hsa-miR-493-5p	CISD2	493856
hsa-miR-493-5p	ALCAM	214
hsa-miR-493-5p	MYOZ2	51778
hsa-miR-493-5p	ALDH5A1	7915
hsa-miR-493-5p	LDLR	3949
hsa-miR-493-5p	REEP5	7905
hsa-miR-493-5p	ARFGEF1	10565
hsa-miR-493-5p	SALL1	6299
hsa-miR-493-5p	NAA38	51691
hsa-miR-493-5p	DNAJC21	134218
hsa-miR-493-5p	OVOL1	5017
hsa-miR-493-5p	DRAM1	55332
hsa-miR-493-5p	THSD7A	221981
hsa-miR-493-5p	BTG1	694
hsa-miR-493-5p	PCDHA10	56139
hsa-miR-493-5p	ESRP2	80004
hsa-miR-493-5p	KDM6A	7403
hsa-miR-493-5p	GTF2IRD1	9569
hsa-miR-493-5p	SNAI1	6615
hsa-miR-493-5p	MAP3K2	10746
hsa-miR-493-5p	TNRC6B	23112
hsa-miR-493-5p	KIF18A	81930
hsa-miR-493-5p	MIER1	57708
hsa-miR-493-5p	AXIN1	8312
hsa-miR-493-5p	MAP4K3	8491
hsa-miR-493-5p	NPNT	255743
hsa-miR-493-5p	TOB2	10766
hsa-miR-493-5p	GFRA1	2674
hsa-miR-493-5p	POU4F1	5457
hsa-miR-493-5p	ARHGAP29	9411
hsa-miR-493-5p	AAK1	22848
hsa-miR-493-5p	PDE11A	50940
hsa-miR-493-5p	PFN2	5217
hsa-miR-493-5p	C5orf15	56951
hsa-miR-493-5p	FAM196A	642938
hsa-miR-493-5p	DLG2	1740
hsa-miR-493-5p	LMOD3	56203
hsa-miR-493-5p	DCUN1D5	84259
hsa-miR-493-5p	ZNF143	7702
hsa-miR-493-5p	ZBED4	9889
hsa-miR-493-5p	CTSV	1515
hsa-miR-493-5p	MCM6	4175
hsa-miR-493-5p	UBE2A	7319
hsa-miR-493-5p	KIAA1671	85379
hsa-miR-493-5p	ENDOD1	23052
hsa-miR-493-5p	ZNF519	162655
hsa-miR-493-5p	MBNL2	10150
hsa-miR-493-5p	PSD3	23362
hsa-miR-493-5p	PTPRC	5788
hsa-miR-493-5p	DLL1	28514
hsa-miR-493-5p	C16orf45	89927
hsa-miR-493-5p	NOD2	64127
hsa-miR-493-5p	CALD1	800
hsa-miR-493-5p	TSN	7247
hsa-miR-493-5p	MAP3K13	9175
hsa-miR-493-5p	RGS10	6001
hsa-miR-493-5p	RASGRP1	10125
hsa-miR-493-5p	ZNF117	51351
hsa-miR-493-5p	SYT4	6860
hsa-miR-493-5p	RAPH1	65059
hsa-miR-493-5p	ZNF704	619279
hsa-miR-493-5p	ALDH9A1	223
hsa-miR-493-5p	COQ3	51805
hsa-miR-493-5p	LRP6	4040
hsa-miR-493-5p	FZD3	7976
hsa-miR-493-5p	FAM47B	170062
hsa-miR-493-5p	USP16	10600
hsa-miR-493-5p	NSL1	25936
hsa-miR-493-5p	SCN1A	6323
hsa-miR-493-5p	KCNV1	27012
hsa-miR-493-5p	P4HA1	5033
hsa-miR-493-5p	SOS2	6655
hsa-miR-493-5p	CAMK2N1	55450
hsa-miR-493-5p	ZBTB38	253461
hsa-miR-493-5p	DCAF17	80067
hsa-miR-493-5p	ZFX	7543
hsa-miR-493-5p	SP1	6667
hsa-miR-493-5p	HDX	139324
hsa-miR-493-5p	CALN1	83698
hsa-miR-493-5p	SPARCL1	8404
hsa-miR-493-5p	ROR2	4920
hsa-miR-493-5p	PPFIA1	8500
hsa-miR-493-5p	CPLX2	10814
hsa-miR-493-5p	PPP1CC	5501
hsa-miR-493-5p	ZNF621	285268
hsa-miR-493-5p	CLSTN1	22883
hsa-miR-493-5p	PIK3C3	5289
hsa-miR-493-5p	STK4	6789
hsa-miR-493-5p	ANKRD50	57182
hsa-miR-493-5p	TMEM170B	100113407
hsa-miR-493-5p	EPHA7	2045
hsa-miR-493-5p	BCCIP	56647
hsa-miR-493-5p	C2orf88	84281
hsa-miR-493-5p	ZNF200	7752
hsa-miR-493-5p	HELZ	9931
hsa-miR-493-5p	MDM4	4194
hsa-miR-493-5p	UBE2G1	7326
hsa-miR-493-5p	PLCB1	23236
hsa-miR-493-5p	ZNF780B	163131
hsa-miR-493-5p	MED13L	23389
hsa-miR-493-5p	REV3L	5980
hsa-miR-493-5p	FLVCR1	28982
hsa-miR-493-5p	ZNF532	55205
hsa-miR-493-5p	LMBR1	64327
hsa-miR-493-5p	TIAL1	7073
hsa-miR-493-5p	UNC5C	8633
hsa-miR-493-5p	GNPTAB	79158
hsa-miR-493-5p	ROBO1	6091
hsa-miR-493-5p	PACRGL	133015
hsa-miR-493-5p	LRRTM3	347731
hsa-miR-493-5p	POLK	51426
hsa-miR-493-5p	TACC1	6867
hsa-miR-493-5p	GMNC	647309
hsa-miR-493-5p	ANK2	287
hsa-miR-493-5p	ATAD2B	54454
hsa-miR-493-5p	GCLC	2729
hsa-miR-493-5p	MARCKS	4082
hsa-miR-493-5p	STAM	8027
hsa-miR-493-5p	C12orf23	90488
hsa-miR-493-5p	DHX36	170506
hsa-miR-493-5p	SIN3A	25942
hsa-miR-493-5p	RAB8B	51762
hsa-miR-493-5p	PDE7B	27115
hsa-miR-493-5p	TRIM36	55521
hsa-miR-493-5p	PCDHA8	56140
hsa-miR-493-5p	KIF11	3832
hsa-miR-493-5p	SP3	6670
hsa-miR-493-5p	WASF3	10810
hsa-miR-493-5p	EMILIN2	84034
hsa-miR-493-5p	TMEM50B	757
hsa-miR-493-5p	OMG	4974
hsa-miR-493-5p	CDC14A	8556
hsa-miR-493-5p	SLC2A13	114134
hsa-miR-493-5p	PPP3CA	5530
hsa-miR-493-5p	TRAM2	9697
hsa-miR-493-5p	WDR37	22884
hsa-miR-493-5p	AURKA	6790
hsa-miR-493-5p	LYRM2	57226
hsa-miR-493-5p	TMEM178B	100507421
hsa-miR-493-5p	RAD18	56852
hsa-miR-493-5p	WNT5A	7474
hsa-miR-493-5p	KIAA1751	85452
hsa-miR-493-5p	TOR1AIP2	163590
hsa-miR-493-5p	TENM1	10178
hsa-miR-493-5p	ACAP2	23527
hsa-miR-493-5p	TRHDE	29953
hsa-miR-493-5p	LYRM7	90624
hsa-miR-493-5p	SBNO1	55206
hsa-miR-493-5p	REEP1	65055
hsa-miR-493-5p	NCOA1	8648
hsa-miR-493-5p	MPP7	143098
hsa-miR-493-5p	SH3TC2	79628
hsa-miR-493-5p	UBE2V2	7336
hsa-miR-493-5p	ZMYM5	9205
hsa-miR-493-5p	BMP8A	353500
hsa-miR-493-5p	SPEN	23013
hsa-miR-493-5p	ACKR4	51554
hsa-miR-493-5p	RASL11B	65997
hsa-miR-493-5p	SHISA9	729993
hsa-miR-493-5p	GNB1	2782
hsa-miR-493-5p	SIPA1L2	57568
hsa-miR-493-5p	MLLT10	8028
hsa-miR-493-5p	MAP1B	4131
hsa-miR-493-5p	FAM114A1	92689
hsa-miR-493-5p	ZNF431	170959
hsa-miR-493-5p	ZAK	51776
hsa-miR-493-5p	ADAM28	10863
hsa-miR-493-5p	AFF4	27125
hsa-miR-493-5p	GALNT10	55568
hsa-miR-493-5p	FRMD3	257019
hsa-miR-493-5p	CAPZA2	830
hsa-miR-493-5p	PCDHA7	56141
hsa-miR-493-5p	ZNF614	80110
hsa-miR-493-5p	RALGPS1	9649
hsa-miR-493-5p	AFF3	3899
hsa-miR-493-5p	SRI	6717
hsa-miR-493-5p	MALT1	10892
hsa-miR-493-5p	TTC7B	145567
hsa-miR-493-5p	NR1D2	9975
hsa-miR-493-5p	SYNE2	23224
hsa-miR-493-5p	KIAA1024	23251
hsa-miR-493-5p	CWC25	54883
hsa-miR-493-5p	GABRA2	2555
hsa-miR-493-5p	TNFSF11	8600
hsa-miR-493-5p	OSBPL6	114880
hsa-miR-493-5p	CXCL3	2921
hsa-miR-493-5p	PKIA	5569
hsa-miR-493-5p	KIAA0408	9729
hsa-miR-493-5p	COX18	285521
hsa-miR-493-5p	FOXJ3	22887
hsa-miR-493-5p	RRP15	51018
hsa-miR-493-5p	JPH3	57338
hsa-miR-493-5p	EXTL2	2135
hsa-miR-493-5p	C16orf62	57020
hsa-miR-493-5p	SSH2	85464
hsa-miR-493-5p	ZMYND8	23613
hsa-miR-493-5p	MGAT3	4248
hsa-miR-493-5p	MTDH	92140
hsa-miR-493-5p	TJP1	7082
hsa-miR-493-5p	FAM76B	143684
hsa-miR-493-5p	ADCY1	107
hsa-miR-493-5p	KLHL36	79786
hsa-miR-493-5p	UBE3A	7337
hsa-miR-493-5p	STK17A	9263
hsa-miR-493-5p	IL15	3600
hsa-miR-493-5p	SAT1	6303
hsa-miR-493-5p	NADK2	133686
hsa-miR-493-5p	ZBTB41	360023
hsa-miR-493-5p	MYT1L	23040
hsa-miR-493-5p	ZNF737	100129842
hsa-miR-493-5p	PLEKHA5	54477
hsa-miR-493-5p	GNG11	2791
hsa-miR-493-5p	FAM135A	57579
hsa-miR-493-5p	FXR1	8087
hsa-miR-493-5p	MARK1	4139
hsa-miR-493-5p	CUL5	8065
hsa-miR-493-5p	SFXN1	94081
hsa-miR-493-5p	ZNF384	171017
hsa-miR-493-5p	PAIP1	10605
hsa-miR-493-5p	SCN2A	6326
hsa-miR-493-5p	CCDC93	54520
hsa-miR-493-5p	AHDC1	27245
hsa-miR-493-5p	PBX3	5090
hsa-miR-493-5p	TBC1D22B	55633
hsa-miR-493-5p	CDH2	1000
hsa-miR-493-5p	C19orf12	83636
hsa-miR-493-5p	RAPGEF2	9693
hsa-miR-493-5p	TCEA1	6917
hsa-miR-493-5p	HNRNPA0	10949
hsa-miR-493-5p	ZNF98	148198
hsa-miR-493-5p	SH2B3	10019
hsa-miR-493-5p	ANTXR1	84168
hsa-miR-493-5p	CMTM6	54918
hsa-miR-493-5p	LAMTOR3	8649
hsa-miR-493-5p	HIVEP2	3097
hsa-miR-493-5p	MAPK1	5594
hsa-miR-493-5p	IQCK	124152
hsa-miR-493-5p	FAM78A	286336
hsa-miR-493-5p	ATL1	51062
hsa-miR-493-5p	FOXO1	2308
hsa-miR-493-5p	TWSG1	57045
hsa-miR-493-5p	ZIC2	7546
hsa-miR-493-5p	GGACT	87769
hsa-miR-493-5p	LHFP	10186
hsa-miR-493-5p	MLLT4	4301
hsa-miR-493-5p	NXPH1	30010
hsa-miR-493-5p	CASC4	113201
hsa-miR-493-5p	WDR33	55339
hsa-miR-493-5p	TMOD1	7111
hsa-miR-493-5p	TMEM106B	54664
hsa-miR-493-5p	ABCD2	225
hsa-miR-493-5p	VASH2	79805
hsa-miR-493-5p	SRSF11	9295
hsa-miR-493-5p	BASP1	10409
hsa-miR-493-5p	SOGA3	387104
hsa-miR-493-5p	SMG1	23049
hsa-miR-493-5p	ESF1	51575
hsa-miR-493-5p	PPP3CB	5532
hsa-miR-493-5p	APOO	79135
hsa-miR-493-5p	CD24	100133941
hsa-miR-493-5p	XIAP	331
hsa-miR-493-5p	TMCO1	54499
hsa-miR-493-5p	ATP2A2	488
hsa-miR-493-5p	F3	2152
hsa-miR-493-5p	MEF2A	4205
hsa-miR-493-5p	EPSTI1	94240
hsa-miR-493-5p	PVRL3	25945
hsa-miR-493-5p	NEO1	4756
hsa-miR-493-5p	AP4S1	11154
hsa-miR-493-5p	CDH19	28513
hsa-miR-493-5p	CDK18	5129
hsa-miR-493-5p	DENND4C	55667
hsa-miR-493-5p	FAM126B	285172
hsa-miR-493-5p	CKS2	1164
hsa-miR-493-5p	PCDHA5	56143
hsa-miR-493-5p	ZNF10	7556
hsa-miR-493-5p	PCDHA9	9752
hsa-miR-493-5p	ZNF714	148206
hsa-miR-493-5p	PTGER3	5733
hsa-miR-493-5p	YIPF4	84272
hsa-miR-493-5p	TMCO3	55002
hsa-miR-493-5p	FAM217B	63939
hsa-miR-493-5p	CADPS	8618
hsa-miR-493-5p	GABRA5	2558
hsa-miR-493-5p	PDK4	5166
hsa-miR-493-5p	EED	8726
hsa-miR-493-5p	CDH11	1009
[truncated: 270 more rows]

## Sheet:  Pink
miRNA	Target Gene	EntrezID
hsa-miR-1185-2-3p	IRX3	79191
hsa-miR-1185-2-3p	NADK2	133686
hsa-miR-1185-2-3p	RBM39	9584
hsa-miR-1185-2-3p	PAG1	55824
hsa-miR-1185-2-3p	CBX3	11335
hsa-miR-1185-2-3p	TRAPPC6B	122553
hsa-miR-1185-2-3p	ATXN3	4287
hsa-miR-1185-2-3p	RPGR	6103
hsa-miR-1185-2-3p	FAM13B	51306
hsa-miR-1185-2-3p	KLF5	688
hsa-miR-1185-2-3p	CTPS2	56474
hsa-miR-1185-2-3p	NOS1	4842
hsa-miR-1185-2-3p	SMARCA4	6597
hsa-miR-1185-2-3p	CDKL2	8999
hsa-miR-1185-2-3p	ZNF140	7699
hsa-miR-1185-2-3p	VCAN	1462
hsa-miR-1185-2-3p	TMEM2	23670
hsa-miR-1185-2-3p	HVCN1	84329
hsa-miR-1185-2-3p	MMS22L	253714
hsa-miR-1185-2-3p	RBM12	10137
hsa-miR-1185-2-3p	SH3TC2	79628
hsa-miR-1185-2-3p	LDLR	3949
hsa-miR-1185-2-3p	LSM5	23658
hsa-miR-1185-2-3p	FRMD3	257019
hsa-miR-1185-2-3p	PEX14	5195
hsa-miR-1185-2-3p	PHIP	55023
hsa-miR-1185-2-3p	NR3C1	2908
hsa-miR-1185-2-3p	SMOC1	64093
hsa-miR-1185-2-3p	SCN5A	6331
hsa-miR-1185-2-3p	TFDP2	7029
hsa-miR-1185-2-3p	ATP2B2	491
hsa-miR-1185-2-3p	TRIB1	10221
hsa-miR-1185-2-3p	LITAF	9516
hsa-miR-1185-2-3p	GABPB1	2553
hsa-miR-1185-2-3p	AFTPH	54812
hsa-miR-1185-2-3p	TXLNG	55787
hsa-miR-1185-2-3p	IRS1	3667
hsa-miR-1185-2-3p	STYX	6815
hsa-miR-1185-2-3p	UBE2D1	7321
hsa-miR-1185-2-3p	TYRP1	7306
hsa-miR-1185-2-3p	CAV2	858
hsa-miR-1185-2-3p	KIF3A	11127
hsa-miR-1185-2-3p	TRMT1L	81627
hsa-miR-1185-2-3p	TMEM167A	153339
hsa-miR-1185-2-3p	SLK	9748
hsa-miR-1185-2-3p	SLC17A6	57084
hsa-miR-1185-2-3p	VPS13A	23230
hsa-miR-1185-2-3p	MFSD4	148808
hsa-miR-1185-2-3p	MTM1	4534
hsa-miR-1185-2-3p	ARID4B	51742
hsa-miR-1185-2-3p	RTN4	57142
hsa-miR-1185-2-3p	PNN	5411
hsa-miR-1185-2-3p	STXBP1	6812
hsa-miR-1185-2-3p	ADCY7	113
hsa-miR-1185-2-3p	STXBP5L	9515
hsa-miR-1185-2-3p	B3GALNT1	8706
hsa-miR-1185-2-3p	ERBB4	2066
hsa-miR-1185-2-3p	FBXO9	26268
hsa-miR-1185-2-3p	STARD13	90627
hsa-miR-1185-2-3p	PIGW	284098
hsa-miR-1185-2-3p	TRIM13	10206
hsa-miR-1185-2-3p	CTTNBP2	83992
hsa-miR-1185-2-3p	MBNL1	4154
hsa-miR-1185-2-3p	TRAF3IP1	26146
hsa-miR-1185-2-3p	SAMD5	389432
hsa-miR-1185-2-3p	PTGFR	5737
hsa-miR-1185-2-3p	UBE2C	11065
hsa-miR-1185-2-3p	TIFA	92610
hsa-miR-1185-2-3p	MCF2	4168
hsa-miR-1185-2-3p	CLEC2D	29121
hsa-miR-1185-2-3p	ARID4A	5926
hsa-miR-1185-2-3p	A1CF	29974
hsa-miR-1185-2-3p	ABCA1	19
hsa-miR-1185-2-3p	LMO3	55885
hsa-miR-1185-2-3p	MEOX2	4223
hsa-miR-1185-2-3p	SHB	6461
hsa-miR-1185-2-3p	VAMP4	8674
hsa-miR-1185-2-3p	WT1	7490
hsa-miR-1185-2-3p	CNR1	1268
hsa-miR-1185-2-3p	TTC28	23331
hsa-miR-1185-2-3p	GSK3B	2932
hsa-miR-1185-2-3p	REG4	83998
hsa-miR-1185-2-3p	SPATA13	221178
hsa-miR-1185-2-3p	SNAP91	9892
hsa-miR-1185-2-3p	SAV1	60485
hsa-miR-1185-2-3p	IRF5	3663
hsa-miR-1185-2-3p	ADNP	23394
hsa-miR-1185-2-3p	UBR1	197131
hsa-miR-1185-2-3p	PAFAH1B2	5049
hsa-miR-1185-2-3p	ZNF280D	54816
hsa-miR-1185-2-3p	ACSL3	2181
hsa-miR-1185-2-3p	SFMBT2	57713
hsa-miR-1185-2-3p	RAB2A	5862
hsa-miR-1185-2-3p	TCF7L2	6934
hsa-miR-1185-2-3p	ASAH1	427
hsa-miR-1185-2-3p	HCN4	10021
hsa-miR-1185-2-3p	UNC119	9094
hsa-miR-1185-2-3p	FGF13	2258
hsa-miR-1185-2-3p	CTDSPL2	51496
hsa-miR-1185-2-3p	ARAP1	116985
hsa-miR-1185-2-3p	IRF2BP2	359948
hsa-miR-1185-2-3p	GABRA1	2554
hsa-miR-1185-2-3p	GDAP2	54834
hsa-miR-1185-2-3p	ALG9	79796
hsa-miR-1185-2-3p	CHODL	140578
hsa-miR-1185-2-3p	RPS6KA1	6195
hsa-miR-1185-2-3p	DAGLA	747
hsa-miR-1185-2-3p	NOVA2	4858
hsa-miR-1185-2-3p	CH25H	9023
hsa-miR-1185-2-3p	FZD3	7976
hsa-miR-1185-2-3p	CYP19A1	1588
hsa-miR-1185-2-3p	FJX1	24147
hsa-miR-1185-2-3p	FRMPD3	84443
hsa-miR-1185-2-3p	UBN2	254048
hsa-miR-1185-2-3p	ZYG11B	79699
hsa-miR-1185-2-3p	PRTG	283659
hsa-miR-1185-2-3p	CDK14	5218
hsa-miR-1185-2-3p	RALGPS2	55103
hsa-miR-1185-2-3p	SET	6418
hsa-miR-1185-2-3p	DCAF7	10238
hsa-miR-1185-2-3p	MBNL3	55796
hsa-miR-1185-2-3p	ITGA2	3673
hsa-miR-1185-2-3p	TEK	7010
hsa-miR-1185-2-3p	USP1	7398
hsa-miR-1185-2-3p	KRIT1	889
hsa-miR-1185-2-3p	RASSF8	11228
hsa-miR-1185-2-3p	MAP1LC3B	81631
hsa-miR-1185-2-3p	ZNF746	155061
hsa-miR-1185-2-3p	FAM65B	9750
hsa-miR-1185-2-3p	CHMP1B	57132
hsa-miR-1185-2-3p	DDHD2	23259
hsa-miR-1185-2-3p	RC3H1	149041
hsa-miR-1185-2-3p	NASP	4678
hsa-miR-1185-2-3p	PANK1	53354
hsa-miR-1185-2-3p	GPR126	57211
hsa-miR-1185-2-3p	POU4F2	5458
hsa-miR-1185-2-3p	ANK3	288
hsa-miR-1185-2-3p	MYCBP	26292
hsa-miR-1185-2-3p	TMEM67	91147
hsa-miR-1185-2-3p	FAM102B	284611
hsa-miR-1185-2-3p	SMNDC1	10285
hsa-miR-1185-2-3p	MAGT1	84061
hsa-miR-1185-2-3p	KLHL3	26249
hsa-miR-1185-2-3p	DBX2	440097
hsa-miR-1185-2-3p	PTPN3	5774
hsa-miR-1185-2-3p	TP53INP1	94241
hsa-miR-1185-2-3p	MECP2	4204
hsa-miR-1185-2-3p	ABL2	27
hsa-miR-1185-2-3p	MFAP3	4238
hsa-miR-1185-2-3p	SKP1	6500
hsa-miR-1185-2-3p	CPD	1362
hsa-miR-1185-2-3p	DPY19L1	23333
hsa-miR-1185-2-3p	GUCY1A3	2982
hsa-miR-1185-2-3p	KATNAL1	84056
hsa-miR-1185-2-3p	RNF182	221687
hsa-miR-1185-2-3p	KBTBD11	9920
hsa-miR-1185-2-3p	NECAB1	64168
hsa-miR-1185-2-3p	SLC44A1	23446
hsa-miR-1185-2-3p	KIAA2018	205717
hsa-miR-1185-2-3p	PAH	5053
hsa-miR-1185-2-3p	GRHL3	57822
hsa-miR-1185-2-3p	RAP1A	5906
hsa-miR-1185-2-3p	ASPH	444
hsa-miR-1185-2-3p	HMGXB4	10042
hsa-miR-1185-2-3p	CCNE2	9134
hsa-miR-1185-2-3p	RAB14	51552
hsa-miR-1185-2-3p	FGD4	121512
hsa-miR-1185-2-3p	ZBTB41	360023
hsa-miR-1185-2-3p	PREPL	9581
hsa-miR-1185-2-3p	DEPDC5	9681
hsa-miR-1185-2-3p	KMT2E	55904
hsa-miR-1185-2-3p	IKZF2	22807
hsa-miR-1185-2-3p	SRSF12	135295
hsa-miR-1185-2-3p	PRKAG2	51422
hsa-miR-1185-2-3p	NPAT	4863
hsa-miR-1185-2-3p	SPAG9	9043
hsa-miR-1185-2-3p	ADAM12	8038
hsa-miR-1185-2-3p	CYP24A1	1591
hsa-miR-1185-2-3p	DSTYK	25778
hsa-miR-1185-2-3p	PPP1R9B	84687
hsa-miR-1185-2-3p	PAN3	255967
hsa-miR-1185-2-3p	TOB1	10140
hsa-miR-1185-2-3p	FAM126B	285172
hsa-miR-1185-2-3p	PHKA1	5255
hsa-miR-1185-2-3p	SLC6A15	55117
hsa-miR-1185-2-3p	HMGB1	3146
hsa-miR-1185-2-3p	SLC39A8	64116
hsa-miR-1185-2-3p	SGCD	6444
hsa-miR-1185-2-3p	ATRX	546
hsa-miR-1185-2-3p	IRX5	10265
hsa-miR-1185-2-3p	KIT	3815
hsa-miR-1185-2-3p	TFAP2A	7020
hsa-miR-1185-2-3p	VCAM1	7412
hsa-miR-1185-2-3p	UQCRB	7381
hsa-miR-1185-2-3p	PDCD10	11235
hsa-miR-1185-2-3p	DOCK8	81704
hsa-miR-1185-2-3p	PCDHA9	9752
hsa-miR-1185-2-3p	KIAA1147	57189
hsa-miR-1185-2-3p	TMEM161B	153396
hsa-miR-1185-2-3p	CCL8	6355
hsa-miR-1185-2-3p	DLX5	1749
hsa-miR-1185-2-3p	PPP2CB	5516
hsa-miR-1185-2-3p	TAP2	6891
hsa-miR-1185-2-3p	EYA4	2070
hsa-miR-1185-2-3p	PCLO	27445
hsa-miR-1185-2-3p	MRPS36	92259
hsa-miR-1185-2-3p	RNF149	284996
hsa-miR-1185-2-3p	ARFGEF2	10564
hsa-miR-1185-2-3p	ARID5B	84159
hsa-miR-1185-2-3p	RGPD8	727851
hsa-miR-1185-2-3p	FBXO34	55030
hsa-miR-1185-2-3p	POLI	11201
hsa-miR-1185-2-3p	CEP41	95681
hsa-miR-1185-2-3p	REL	5966
hsa-miR-1185-2-3p	ACADSB	36
hsa-miR-1185-2-3p	MITF	4286
hsa-miR-1185-2-3p	SLC1A2	6506
hsa-miR-1185-2-3p	B3GALT2	8707
hsa-miR-1185-2-3p	CR2	1380
hsa-miR-1185-2-3p	PUM2	23369
hsa-miR-1185-2-3p	HMGB3	3149
hsa-miR-1185-2-3p	ZBTB5	9925
hsa-miR-1185-2-3p	ATL2	64225
hsa-miR-1185-2-3p	PHF3	23469
hsa-miR-1185-2-3p	ZCCHC24	219654
hsa-miR-1185-2-3p	CNTN3	5067
hsa-miR-1185-2-3p	ESRP1	54845
hsa-miR-1185-2-3p	FUT8	2530
hsa-miR-1185-2-3p	RAP2B	5912
hsa-miR-1185-2-3p	ENAM	10117
hsa-miR-1185-2-3p	NEMF	9147
hsa-miR-1185-2-3p	SLC22A10	387775
hsa-miR-1185-2-3p	ST3GAL6	10402
hsa-miR-1185-2-3p	NXT2	55916
hsa-miR-1185-2-3p	CLDN23	137075
hsa-miR-1185-2-3p	SORT1	6272
hsa-miR-1185-2-3p	FSTL5	56884
hsa-miR-1185-2-3p	TNFRSF11B	4982
hsa-miR-1185-2-3p	FXR1	8087
hsa-miR-1185-2-3p	RAB3GAP2	25782
hsa-miR-1185-2-3p	MASTL	84930
hsa-miR-1185-2-3p	GK5	256356
hsa-miR-1185-2-3p	SLC35E1	79939
hsa-miR-1185-2-3p	LIFR	3977
hsa-miR-1185-2-3p	SCAI	286205
hsa-miR-1185-2-3p	HNRNPU	3192
hsa-miR-1185-2-3p	NFKBIZ	64332
hsa-miR-1185-2-3p	TGFBR3	7049
hsa-miR-1185-2-3p	TNPO1	3842
hsa-miR-1185-2-3p	VCL	7414
hsa-miR-1185-2-3p	ZNF652	22834
hsa-miR-1185-2-3p	ZNF709	163051
hsa-miR-1185-2-3p	RAPGEF5	9771
hsa-miR-1185-2-3p	ZNF248	57209
hsa-miR-1185-2-3p	ANKS1A	23294
hsa-miR-1185-2-3p	ALDH1L2	160428
hsa-miR-1185-2-3p	DLX6	1750
hsa-miR-1185-2-3p	PRKAA1	5562
hsa-miR-1185-2-3p	CTR9	9646
hsa-miR-1185-2-3p	DNAJC15	29103
hsa-miR-1185-2-3p	RGPD4	285190
hsa-miR-1185-2-3p	POLR3G	10622
hsa-miR-1185-2-3p	FAXC	84553
hsa-miR-1185-2-3p	SLC15A5	729025
hsa-miR-1185-2-3p	TRIM61	391712
hsa-miR-1185-2-3p	AGGF1	55109
hsa-miR-1185-2-3p	FNIP1	96459
hsa-miR-1185-2-3p	RGS4	5999
hsa-miR-1185-2-3p	SOCS7	30837
hsa-miR-1185-2-3p	XIAP	331
hsa-miR-1185-2-3p	SLC14A1	6563
hsa-miR-1185-2-3p	CDS2	8760
hsa-miR-1185-2-3p	SYDE2	84144
hsa-miR-1185-2-3p	CASP8AP2	9994
hsa-miR-1185-2-3p	SLC39A14	23516
hsa-miR-1185-2-3p	OTUD1	220213
hsa-miR-1185-2-3p	PBX3	5090
hsa-miR-1185-2-3p	GABPA	2551
hsa-miR-1185-2-3p	RASA1	5921
hsa-miR-1185-2-3p	TRIP4	9325
hsa-miR-1185-2-3p	ERAP1	51752
hsa-miR-1185-2-3p	ZNF441	126068
hsa-miR-1185-2-3p	BCL6	604
hsa-miR-1185-2-3p	KHDRBS3	10656
hsa-miR-1185-2-3p	GSTCD	79807
hsa-miR-1185-2-3p	C20orf112	140688
hsa-miR-1185-2-3p	GNG12	55970
hsa-miR-1185-2-3p	PHLDA1	22822
hsa-miR-1185-2-3p	UPRT	139596
hsa-miR-1185-2-3p	SNCA	6622
hsa-miR-1185-2-3p	USP6	9098
hsa-miR-1185-2-3p	DBT	1629
hsa-miR-1185-2-3p	MOB4	25843
hsa-miR-1185-2-3p	AKAP9	10142
hsa-miR-1185-2-3p	NAA15	80155
hsa-miR-1185-2-3p	LOX	4015
hsa-miR-1185-2-3p	ILDR1	286676
hsa-miR-1185-2-3p	PMAIP1	5366
hsa-miR-1185-2-3p	RNF220	55182
hsa-miR-1185-2-3p	HOXA9	3205
hsa-miR-1185-2-3p	HIAT1	64645
hsa-miR-1185-2-3p	EZR	7430
hsa-miR-1185-2-3p	LMTK2	22853
hsa-miR-1185-2-3p	TOR1AIP2	163590
hsa-miR-1185-2-3p	BCLAF1	9774
hsa-miR-1185-2-3p	MGRN1	23295
hsa-miR-1185-2-3p	RHBDL3	162494
hsa-miR-1185-2-3p	NKTR	4820
hsa-miR-1185-2-3p	C21orf91	54149
hsa-miR-1185-2-3p	TRDMT1	1787
hsa-miR-1185-2-3p	CNOT6	57472
hsa-miR-1185-2-3p	PRKCA	5578
hsa-miR-1185-2-3p	GCC2	9648
hsa-miR-1185-2-3p	TSC22D1	8848
hsa-miR-1185-2-3p	STRN4	29888
hsa-miR-1185-2-3p	STAG2	10735
hsa-miR-1185-2-3p	FAM126A	84668
hsa-miR-1185-2-3p	AFF4	27125
hsa-miR-1185-2-3p	RGPD6	729540
hsa-miR-1185-2-3p	ICA1L	130026
hsa-miR-1185-2-3p	WDR60	55112
hsa-miR-1185-2-3p	TUBGCP5	114791
hsa-miR-1185-2-3p	PDE11A	50940
hsa-miR-1185-2-3p	AREG	374
hsa-miR-1185-2-3p	MPZ	4359
hsa-miR-1185-2-3p	IQGAP1	8826
hsa-miR-1185-2-3p	XDH	7498
hsa-miR-1185-2-3p	CREBBP	1387
hsa-miR-1185-2-3p	ZFPM2	23414
hsa-miR-1185-2-3p	IBSP	3381
hsa-miR-1185-2-3p	KIAA1324L	222223
hsa-miR-1185-2-3p	DCLRE1B	64858
hsa-miR-1185-2-3p	JAK2	3717
hsa-miR-1185-2-3p	BACE1	23621
hsa-miR-1185-2-3p	PCSK2	5126
hsa-miR-1185-2-3p	ZNF250	58500
hsa-miR-1185-2-3p	ROBO2	6092
hsa-miR-1185-2-3p	YAF2	10138
hsa-miR-1185-2-3p	CD163	9332
hsa-miR-1185-2-3p	FLT1	2321
hsa-miR-1185-2-3p	RIPPLY3	53820
hsa-miR-1185-2-3p	KLF10	7071
hsa-miR-1185-2-3p	FUT9	10690
hsa-miR-1185-2-3p	GABRA4	2557
hsa-miR-1185-2-3p	CSPP1	79848
hsa-miR-1185-2-3p	DUSP19	142679
hsa-miR-1185-2-3p	USP6NL	9712
hsa-miR-1185-2-3p	CYP26B1	56603
hsa-miR-1185-2-3p	SAA2	6289
hsa-miR-1185-2-3p	LGSN	51557
hsa-miR-1185-2-3p	CDC27	996
hsa-miR-1185-2-3p	KCMF1	56888
hsa-miR-1185-2-3p	PCM1	5108
hsa-miR-1185-2-3p	LATS1	9113
hsa-miR-1185-2-3p	NRIP1	8204
hsa-miR-1185-2-3p	DOCK3	1795
hsa-miR-1185-2-3p	RNF19A	25897
hsa-miR-1185-2-3p	NUDCD1	84955
hsa-miR-1185-2-3p	SNX33	257364
hsa-miR-1185-2-3p	WDR82	80335
hsa-miR-1185-2-3p	RSPO2	340419
hsa-miR-1185-2-3p	PPP2R5E	5529
hsa-miR-1185-2-3p	PBRM1	55193
hsa-miR-1185-2-3p	TNC	3371
hsa-miR-1185-2-3p	TMEM135	65084
hsa-miR-1185-2-3p	C4orf40	401137
hsa-miR-1185-2-3p	UHRF1	29128
hsa-miR-1185-2-3p	ZFX	7543
hsa-miR-1185-2-3p	KIN	22944
hsa-miR-1185-2-3p	CALN1	83698
hsa-miR-1185-2-3p	TXLNB	167838
hsa-miR-1185-2-3p	MIB1	57534
hsa-miR-1185-2-3p	ZNF780B	163131
hsa-miR-1185-2-3p	EDN2	1907
hsa-miR-1185-2-3p	PLEKHG1	57480
hsa-miR-1185-2-3p	MAPK1	5594
hsa-miR-1185-2-3p	ERCC3	2071
hsa-miR-1185-2-3p	RNF141	50862
hsa-miR-1185-2-3p	SLC2A13	114134
hsa-miR-1185-2-3p	TRIM52	84851
hsa-miR-1185-2-3p	RPS6KA6	27330
hsa-miR-1185-2-3p	C16orf52	730094
hsa-miR-1185-2-3p	ACVR1C	130399
hsa-miR-1185-2-3p	UBE2W	55284
hsa-miR-1185-2-3p	ESCO1	114799
hsa-miR-1185-2-3p	LANCL2	55915
hsa-miR-1185-2-3p	MSX1	4487
hsa-miR-1185-2-3p	CSNK1G3	1456
hsa-miR-1185-2-3p	SLC35A3	23443
hsa-miR-1185-2-3p	IL7	3574
hsa-miR-1185-2-3p	USP48	84196
hsa-miR-1185-2-3p	BEND7	222389
hsa-miR-1185-2-3p	SLC30A5	64924
hsa-miR-1185-2-3p	KCNC2	3747
hsa-miR-1185-2-3p	KMT2C	58508
hsa-miR-1185-2-3p	ROCK1	6093
hsa-miR-1185-2-3p	GCFC2	6936
hsa-miR-1185-2-3p	LHX2	9355
hsa-miR-1185-2-3p	MTOR	2475
hsa-miR-1185-2-3p	SORL1	6653
hsa-miR-1185-2-3p	TLE4	7091
hsa-miR-1185-2-3p	C2orf54	79919
hsa-miR-1185-2-3p	PRICKLE1	144165
hsa-miR-1185-2-3p	ERO1LB	56605
hsa-miR-1185-2-3p	COBLL1	22837
hsa-miR-1185-2-3p	CBLN4	140689
hsa-miR-1185-2-3p	SALL1	6299
hsa-miR-1185-2-3p	AZIN1	51582
hsa-miR-1185-2-3p	CDK6	1021
hsa-miR-1185-2-3p	MDM1	56890
hsa-miR-1185-2-3p	ATG12	9140
hsa-miR-1185-2-3p	ENC1	8507
hsa-miR-1185-2-3p	E2F6	1876
hsa-miR-1185-2-3p	NSL1	25936
hsa-miR-1185-2-3p	MAGI3	260425
hsa-miR-1185-2-3p	WASF2	10163
hsa-miR-1185-2-3p	NDFIP1	80762
hsa-miR-1185-2-3p	MAB21L1	4081
hsa-miR-1185-2-3p	KIAA2022	340533
hsa-miR-1185-2-3p	RPRD1A	55197
hsa-miR-1185-2-3p	IAPP	3375
hsa-miR-1185-2-3p	PCDH15	65217
hsa-miR-1185-2-3p	AREGB	727738
hsa-miR-1185-2-3p	LRP6	4040
hsa-miR-1185-2-3p	SFPQ	6421
hsa-miR-1185-2-3p	PDS5B	23047
hsa-miR-1185-2-3p	YPEL3	83719
hsa-miR-1185-2-3p	KCNG3	170850
hsa-miR-1185-2-3p	STIM2	57620
hsa-miR-1185-2-3p	LEPROT	54741
hsa-miR-1185-2-3p	EGR2	1959
hsa-miR-1185-2-3p	ZNF608	57507
hsa-miR-1185-2-3p	PRPS2	5634
hsa-miR-1185-2-3p	ARF3	377
hsa-miR-1185-2-3p	FRMPD4	9758
hsa-miR-1185-2-3p	ETV5	2119
hsa-miR-1185-2-3p	PWWP2A	114825
hsa-miR-1185-2-3p	ZNF638	27332
hsa-miR-1185-2-3p	ZCCHC8	55596
hsa-miR-1185-2-3p	CCDC85A	114800
hsa-miR-1185-2-3p	GLOD4	51031
hsa-miR-1185-2-3p	BCKDHB	594
hsa-miR-1185-2-3p	MYCN	4613
hsa-miR-1185-2-3p	SLC22A3	6581
hsa-miR-1185-2-3p	ASAP2	8853
hsa-miR-1185-2-3p	MORC3	23515
hsa-miR-1185-2-3p	RGPD5	84220
hsa-miR-1185-2-3p	SEMA3D	223117
hsa-miR-1185-2-3p	PDCD6IP	10015
hsa-miR-1185-2-3p	IPMK	253430
hsa-miR-1185-2-3p	PDE7A	5150
hsa-miR-1185-2-3p	GABRB2	2561
hsa-miR-1185-2-3p	RBM25	58517
hsa-miR-1185-2-3p	RORA	6095
hsa-miR-1185-2-3p	QKI	9444
hsa-miR-1185-2-3p	ANKIB1	54467
hsa-miR-1185-2-3p	ID2	3398
hsa-miR-1185-2-3p	SOX9	6662
hsa-miR-1185-2-3p	TLR4	7099
hsa-miR-1185-2-3p	PRDM1	639
hsa-miR-1185-2-3p	EDAR	10913
hsa-miR-1185-2-3p	GPRASP1	9737
hsa-miR-1185-2-3p	EIF5A2	56648
hsa-miR-1185-2-3p	WDR37	22884
hsa-miR-1185-2-3p	DYNLL2	140735
hsa-miR-1185-2-3p	SATB1	6304
hsa-miR-1185-2-3p	CDKN1B	1027
hsa-miR-1185-2-3p	SOD2	6648
hsa-miR-1185-2-3p	DGKI	9162
hsa-miR-1185-2-3p	MAPKAPK5	8550
hsa-miR-1185-2-3p	CHMP2B	25978
hsa-miR-1185-2-3p	NAV3	89795
hsa-miR-1185-2-3p	JAKMIP3	282973
hsa-miR-1185-2-3p	TENM1	10178
hsa-miR-1185-2-3p	KIAA1715	80856
hsa-miR-1185-2-3p	MAP2	4133
hsa-miR-1185-2-3p	PLCXD3	345557
hsa-miR-1185-2-3p	LOC100127983	100127983
hsa-miR-1185-2-3p	VIMP	55829
hsa-miR-1185-2-3p	CAPRIN1	4076
hsa-miR-1185-2-3p	SFSWAP	6433
hsa-miR-1185-2-3p	RGL1	23179
hsa-miR-1185-2-3p	ZNF721	170960
hsa-miR-1185-2-3p	SEC24D	9871
hsa-miR-1185-2-3p	ZSWIM6	57688
hsa-miR-1185-2-3p	SUN1	23353
hsa-miR-1185-2-3p	MIER3	166968
hsa-miR-1185-2-3p	EIF4A2	1974
hsa-miR-1185-2-3p	SLAIN2	57606
hsa-miR-1185-2-3p	PTGER3	5733
hsa-miR-1185-2-3p	ART3	419
hsa-miR-1185-2-3p	MAML1	9794
hsa-miR-1185-2-3p	F2RL2	2151
hsa-miR-1185-2-3p	ST8SIA3	51046
hsa-miR-1185-2-3p	FBXO32	114907
hsa-miR-1185-2-3p	CCDC39	339829
hsa-miR-1185-2-3p	SERINC3	10955
hsa-miR-1185-2-3p	USP45	85015
hsa-miR-1185-2-3p	N4BP2	55728
hsa-miR-1185-2-3p	FILIP1L	11259
hsa-miR-1185-2-3p	GOLGA7	51125
hsa-miR-1185-2-3p	BMP3	651
hsa-miR-1185-2-3p	MYO1E	4643
hsa-miR-1185-2-3p	PRPF4B	8899
hsa-miR-1185-2-3p	TSPAN12	23554
hsa-miR-1185-2-3p	SLC37A3	84255
hsa-miR-1185-2-3p	PRR14L	253143
hsa-miR-1185-2-3p	ARPC5	10092
hsa-miR-1185-2-3p	UBE2Z	65264
hsa-miR-1185-2-3p	ZBTB38	253461
hsa-miR-1185-2-3p	ENPP3	5169
hsa-miR-1185-2-3p	INO80D	54891
hsa-miR-1185-2-3p	GRIA3	2892
hsa-miR-1185-2-3p	KIF13A	63971
hsa-miR-1185-2-3p	FAM105A	54491
hsa-miR-1185-2-3p	WDR33	55339
hsa-miR-1185-2-3p	TSEN34	79042
hsa-miR-1185-2-3p	STK10	6793
hsa-miR-1185-2-3p	TMPO	7112
hsa-miR-1185-2-3p	PNRC1	10957
hsa-miR-1185-2-3p	GLI2	2736
hsa-miR-1185-2-3p	PGAP1	80055
hsa-miR-1185-2-3p	FMN2	56776
hsa-miR-1185-2-3p	RAB18	22931
hsa-miR-1185-2-3p	DYNC2LI1	51626
hsa-miR-1185-2-3p	COL19A1	1310
hsa-miR-1185-2-3p	PDZK1	5174
hsa-miR-1185-2-3p	SON	6651
hsa-miR-1185-2-3p	SLC33A1	9197
hsa-miR-1185-2-3p	PDE5A	8654
hsa-miR-1185-2-3p	SUSD5	26032
hsa-miR-1185-2-3p	SLC25A21	89874
hsa-miR-1185-2-3p	CHAMP1	283489
hsa-miR-1185-2-3p	MASP1	5648
hsa-miR-1185-2-3p	TRAPPC3L	100128327
hsa-miR-1185-2-3p	EAPP	55837
hsa-miR-1185-2-3p	ANP32A	8125
hsa-miR-1185-2-3p	FAM172A	83989
hsa-miR-1185-2-3p	RPL22L1	200916
hsa-miR-1185-2-3p	NPTX1	4884
hsa-miR-1185-2-3p	DNAJB12	54788
hsa-miR-1185-2-3p	ELK4	2005
hsa-miR-1185-2-3p	KIAA1467	57613
hsa-miR-1185-2-3p	DDX46	9879
hsa-miR-1185-2-3p	GADL1	339896
hsa-miR-1185-2-3p	FERMT2	10979
hsa-miR-1185-2-3p	ZBTB44	29068
hsa-miR-1185-2-3p	WDR17	116966
hsa-miR-1185-2-3p	BMP7	655
hsa-miR-1185-2-3p	BEX4	56271
hsa-miR-1185-2-3p	NEUROD1	4760
hsa-miR-1185-2-3p	MBD2	8932
hsa-miR-1185-2-3p	ITGA6	3655
hsa-miR-1185-2-3p	CADM2	253559
hsa-miR-1185-2-3p	TSPAN2	10100
hsa-miR-1185-2-3p	IRX1	79192
hsa-miR-1185-2-3p	2018-03-01	55016
hsa-miR-1185-2-3p	PRDM16	63976
hsa-miR-1185-2-3p	CALCRL	10203
hsa-miR-1185-2-3p	ING3	54556
hsa-miR-1185-2-3p	MCTP2	55784
hsa-miR-1185-2-3p	INSM1	3642
hsa-miR-1185-2-3p	STRN	6801
hsa-miR-1185-2-3p	TIMP3	7078
hsa-miR-1185-2-3p	TPD52	7163
hsa-miR-1185-2-3p	DST	667
hsa-miR-1185-2-3p	GP1BA	2811
hsa-miR-1185-2-3p	ULBP1	80329
hsa-miR-1185-2-3p	METTL21A	151194
hsa-miR-1185-2-3p	ZNF292	23036
hsa-miR-1185-2-3p	SPAST	6683
hsa-miR-1185-2-3p	LSM14A	26065
hsa-miR-1185-2-3p	TMEM47	83604
hsa-miR-1185-2-3p	LHFPL3	375612
hsa-miR-1185-2-3p	PSMA1	5682
hsa-miR-1185-2-3p	CD24	100133941
hsa-miR-1185-2-3p	DNAJB9	4189
hsa-miR-1185-2-3p	NUP160	23279
hsa-miR-1185-2-3p	ENKUR	219670
hsa-miR-1185-2-3p	ANKRA2	57763
hsa-miR-1185-2-3p	ASXL1	171023
hsa-miR-1185-2-3p	EPHA5	2044
hsa-miR-1185-2-3p	PTGS2	5743
hsa-miR-1185-2-3p	KIF14	9928
hsa-miR-1185-2-3p	FAT1	2195
hsa-miR-1185-2-3p	ZNF639	51193
hsa-miR-1185-2-3p	ZNF680	340252
hsa-miR-1185-2-3p	CCDC126	90693
hsa-miR-1185-2-3p	TBK1	29110
hsa-miR-1185-2-3p	UBR3	130507
hsa-miR-1185-2-3p	FOXJ2	55810
hsa-miR-1185-2-3p	KLF12	11278
hsa-miR-1185-2-3p	BMPR2	659
hsa-miR-1185-2-3p	NFX1	4799
hsa-miR-1185-2-3p	WASL	8976
hsa-miR-1185-2-3p	ZNF10	7556
hsa-miR-1185-2-3p	SLC7A11	23657
hsa-miR-1185-2-3p	ATP13A3	79572
hsa-miR-1185-2-3p	WDR72	256764
hsa-miR-1185-2-3p	GRIK3	2899
hsa-miR-1185-2-3p	EGLN1	54583
hsa-miR-1185-2-3p	ADAMTS5	11096
hsa-miR-1185-2-3p	OR2C3	81472
hsa-miR-1185-2-3p	EFR3A	23167
hsa-miR-1185-2-3p	PHF13	148479
hsa-miR-1185-2-3p	PLSCR1	5359
hsa-miR-1185-2-3p	ONECUT2	9480
hsa-miR-1185-2-3p	ZC3H6	376940
hsa-miR-1185-2-3p	HSPE1-MOB4	100529241
hsa-miR-1185-2-3p	MAP3K5	4217
hsa-miR-1185-2-3p	SGCG	6445
hsa-miR-1185-2-3p	MED13L	23389
hsa-miR-1185-2-3p	LCTL	197021
hsa-miR-1185-2-3p	F2R	2149
hsa-miR-1185-2-3p	PURA	5813
hsa-miR-1185-2-3p	TRAPPC4	51399
hsa-miR-1185-2-3p	EYS	346007
hsa-miR-140-3p	AGL	178
hsa-miR-140-3p	PDK3	5165
hsa-miR-140-3p	LPGAT1	9926
hsa-miR-140-3p	RABGEF1	27342
hsa-miR-140-3p	FOXG1	2290
hsa-miR-140-3p	ETNK1	55500
hsa-miR-140-3p	ZNF772	400720
hsa-miR-140-3p	LAMP2	3920
hsa-miR-140-3p	TCF4	6925
hsa-miR-140-3p	RCAN3	11123
hsa-miR-140-3p	ZFP14	57677
hsa-miR-140-3p	PPAP2B	8613
hsa-miR-140-3p	SMIM13	221710
hsa-miR-140-3p	ZNF557	79230
hsa-miR-140-3p	LCOR	84458
hsa-miR-140-3p	DGKG	1608
hsa-miR-140-3p	ACSM3	6296
hsa-miR-140-3p	TIMM17A	10440
hsa-miR-140-3p	C21orf91	54149
hsa-miR-140-3p	MYB	4602
hsa-miR-140-3p	HAUS3	79441
hsa-miR-140-3p	MEIS2	4212
hsa-miR-140-3p	WIPF1	7456
hsa-miR-140-3p	IRAK3	11213
hsa-miR-140-3p	SYNCRIP	10492
hsa-miR-140-3p	AKAP5	9495
hsa-miR-140-3p	RBFOX2	23543
hsa-miR-140-3p	ADCY9	115
hsa-miR-140-3p	PVRL3	25945
hsa-miR-140-3p	SIRPA	140885
hsa-miR-140-3p	GRB10	2887
hsa-miR-140-3p	SRP19	6728
hsa-miR-140-3p	IL24	11009
hsa-miR-140-3p	FAIM	55179
hsa-miR-140-3p	MAPK1	5594
hsa-miR-140-3p	SPPL3	121665
hsa-miR-140-3p	NFYA	4800
hsa-miR-140-3p	B3GALNT1	8706
hsa-miR-140-3p	PHKB	5257
hsa-miR-140-3p	NR1D2	9975
hsa-miR-140-3p	MRPL15	29088
hsa-miR-140-3p	FOXO3	2309
hsa-miR-140-3p	CAND1	55832
hsa-miR-140-3p	TMBIM1	64114
hsa-miR-140-3p	MTMR3	8897
hsa-miR-140-3p	VGLL2	245806
hsa-miR-140-3p	PHF17	79960
hsa-miR-140-3p	CHL1	10752
hsa-miR-140-3p	ZNF594	84622
hsa-miR-140-3p	SKIL	6498
hsa-miR-140-3p	FAM105A	54491
hsa-miR-140-3p	SH3TC2	79628
hsa-miR-140-3p	CORO2A	7464
hsa-miR-140-3p	RRAS2	22800
hsa-miR-140-3p	RPH3AL	9501
hsa-miR-140-3p	AP2A2	161
hsa-miR-140-3p	PCDH11X	27328
hsa-miR-140-3p	LRP2BP	55805
hsa-miR-140-3p	PTPN1	5770
hsa-miR-140-3p	CMPK2	129607
hsa-miR-140-3p	NOVA1	4857
hsa-miR-140-3p	POU2F1	5451
hsa-miR-140-3p	PTBP3	9991
hsa-miR-140-3p	TMOD2	29767
hsa-miR-140-3p	GSTM3	2947
hsa-miR-140-3p	ITFG2	55846
hsa-miR-140-3p	RFPL4B	442247
hsa-miR-140-3p	LCP1	3936
hsa-miR-140-3p	ATL2	64225
hsa-miR-140-3p	BSN	8927
hsa-miR-140-3p	ZBTB38	253461
hsa-miR-140-3p	FRAS1	80144
hsa-miR-140-3p	MMP24	10893
hsa-miR-140-3p	KRTAP4-3	85290
hsa-miR-140-3p	DNM1	1759
hsa-miR-140-3p	WDR5B	54554
hsa-miR-140-3p	NOV	4856
hsa-miR-140-3p	TTC21B	79809
hsa-miR-140-3p	ZNF3	7551
hsa-miR-140-3p	PRKD3	23683
hsa-miR-140-3p	CD274	29126
hsa-miR-140-3p	FAM91A1	157769
hsa-miR-140-3p	KLHL9	55958
hsa-miR-140-3p	RAP2A	5911
hsa-miR-140-3p	CCDC173	129881
hsa-miR-140-3p	HMGCS1	3157
hsa-miR-140-3p	AGPAT4	56895
hsa-miR-140-3p	SMIM15	643155
hsa-miR-140-3p	LIFR	3977
hsa-miR-140-3p	SLC7A6	9057
hsa-miR-140-3p	BRWD3	254065
hsa-miR-140-3p	ITIH5	80760
hsa-miR-140-3p	UBE2C	11065
hsa-miR-140-3p	ZNF830	91603
hsa-miR-140-3p	CCNJ	54619
hsa-miR-140-3p	OPHN1	4983
hsa-miR-140-3p	MOB3B	79817
hsa-miR-140-3p	MOCS2	4338
hsa-miR-140-3p	ZNF20	7568
hsa-miR-140-3p	PLEKHG3	26030
hsa-miR-140-3p	AK4	205
hsa-miR-140-3p	OLA1	29789
hsa-miR-140-3p	SPRED2	200734
hsa-miR-140-3p	VAMP2	6844
hsa-miR-140-3p	LILRA2	11027
hsa-miR-140-3p	UGGT1	56886
hsa-miR-140-3p	RGS1	5996
hsa-miR-140-3p	ZNF280B	140883
hsa-miR-140-3p	NPY2R	4887
hsa-miR-140-3p	APOL6	80830
hsa-miR-140-3p	PPBP	5473
hsa-miR-140-3p	HNF4G	3174
hsa-miR-140-3p	OTUD7B	56957
hsa-miR-140-3p	IQCJ	654502
hsa-miR-140-3p	CASD1	64921
hsa-miR-140-3p	VAPA	9218
hsa-miR-140-3p	GXYLT1	283464
hsa-miR-140-3p	WIF1	11197
hsa-miR-140-3p	NEK9	91754
hsa-miR-140-3p	EIF5	1983
hsa-miR-140-3p	CELF1	10658
hsa-miR-140-3p	PAFAH1B2	5049
hsa-miR-140-3p	PROSER1	80209
hsa-miR-140-3p	RHOBTB3	22836
hsa-miR-140-3p	TTLL3	26140
hsa-miR-140-3p	ATP1B1	481
hsa-miR-140-3p	IL19	29949
hsa-miR-140-3p	TACC1	6867
hsa-miR-140-3p	C1GALT1	56913
hsa-miR-140-3p	ROBO2	6092
hsa-miR-140-3p	CACUL1	143384
hsa-miR-140-3p	OTX2	5015
hsa-miR-140-3p	ARPC5L	81873
hsa-miR-140-3p	PKIA	5569
hsa-miR-140-3p	FOXK2	3607
hsa-miR-140-3p	GOPC	57120
hsa-miR-140-3p	CCDC179	100500938
hsa-miR-140-3p	FADS1	3992
hsa-miR-140-3p	NBEAL1	65065
hsa-miR-140-3p	CYTH3	9265
hsa-miR-140-3p	TPRG1	285386
hsa-miR-140-3p	AHCYL2	23382
hsa-miR-140-3p	CABLES1	91768
hsa-miR-140-3p	SLC1A4	6509
hsa-miR-140-3p	GID8	54994
hsa-miR-140-3p	PAK2	5062
hsa-miR-140-3p	REEP5	7905
hsa-miR-140-3p	SCAMP1	9522
hsa-miR-140-3p	BCL2	596
hsa-miR-140-3p	TRIM33	51592
hsa-miR-140-3p	HPCAL1	3241
hsa-miR-140-3p	TULP4	56995
hsa-miR-140-3p	SCN9A	6335
hsa-miR-140-3p	GPR180	160897
hsa-miR-140-3p	PITPNM3	83394
hsa-miR-140-3p	GOLT1B	51026
hsa-miR-140-3p	CAPRIN1	4076
hsa-miR-140-3p	PELI1	57162
hsa-miR-140-3p	ARPC4-TTLL3	100526693
hsa-miR-140-3p	MCM6	4175
hsa-miR-140-3p	BRD9	65980
hsa-miR-140-3p	KIAA0226	9711
hsa-miR-140-3p	ZC3H6	376940
hsa-miR-140-3p	WDFY3	23001
hsa-miR-140-3p	DTD1	92675
hsa-miR-140-3p	USP47	55031
hsa-miR-140-3p	PCDH11Y	83259
hsa-miR-140-3p	AGPS	8540
hsa-miR-140-3p	SOCS5	9655
hsa-miR-140-3p	BTG1	694
hsa-miR-140-3p	UNC80	285175
hsa-miR-140-3p	SRP72	6731
hsa-miR-140-3p	MIER3	166968
hsa-miR-140-3p	PDCL	5082
hsa-miR-140-3p	BNC1	646
hsa-miR-140-3p	RPS6KA3	6197
hsa-miR-140-3p	NAALAD2	10003
hsa-miR-140-3p	MBTPS2	51360
hsa-miR-140-3p	MARCKS	4082
hsa-miR-140-3p	KIAA1147	57189
hsa-miR-140-3p	SRGAP3	9901
hsa-miR-140-3p	ATXN7L3B	552889
hsa-miR-140-3p	MPZL1	9019
hsa-miR-140-3p	TAB2	23118
hsa-miR-140-3p	ZNF618	114991
hsa-miR-140-3p	GLG1	2734
hsa-miR-140-3p	SLC6A13	6540
hsa-miR-140-3p	PLEKHB2	55041
hsa-miR-140-3p	PLCL1	5334
hsa-miR-140-3p	PCGF5	84333
hsa-miR-140-3p	JRK	8629
hsa-miR-140-3p	CACNA1B	774
hsa-miR-140-3p	IDS	3423
hsa-miR-140-3p	GCFC2	6936
hsa-miR-140-3p	SYNPO2	171024
hsa-miR-140-3p	PDE6B	5158
hsa-miR-140-3p	APH1B	83464
hsa-miR-140-3p	CBL	867
hsa-miR-140-3p	CLIP1	6249
hsa-miR-140-3p	ATP6AP2	10159
hsa-miR-140-3p	ATP6V1D	51382
hsa-miR-140-3p	CHST6	4166
hsa-miR-140-3p	VANGL2	57216
hsa-miR-140-3p	ACVR2B	93
hsa-miR-140-3p	DNAJC24	120526
hsa-miR-140-3p	SMARCA2	6595
hsa-miR-140-3p	MAP10	54627
hsa-miR-140-3p	SCAI	286205
hsa-miR-140-3p	IFNAR2	3455
hsa-miR-140-3p	DIDO1	11083
hsa-miR-140-3p	TMEM159	57146
hsa-miR-140-3p	CUX1	1523
hsa-miR-140-3p	COQ7	10229
hsa-miR-140-3p	WDFY1	57590
hsa-miR-140-3p	UBXN10	127733
hsa-miR-140-3p	ZNF460	10794
hsa-miR-140-3p	FAXC	84553
hsa-miR-140-3p	UNC5C	8633
hsa-miR-140-3p	FGF9	2254
hsa-miR-140-3p	KCNMA1	3778
hsa-miR-140-3p	SLAIN2	57606
hsa-miR-140-3p	WNT5A	7474
hsa-miR-140-3p	C4orf46	201725
hsa-miR-140-3p	SGIP1	84251
hsa-miR-140-3p	GNB4	59345
hsa-miR-140-3p	2018-03-06	10299
hsa-miR-140-3p	STK17B	9262
hsa-miR-140-3p	TMEM245	23731
hsa-miR-140-3p	GOT1	2805
hsa-miR-140-3p	PRKCI	5584
hsa-miR-140-3p	NRIP1	8204
hsa-miR-140-3p	CD38	952
hsa-miR-140-3p	ITGA6	3655
hsa-miR-140-3p	MARCKSL1	65108
hsa-miR-140-3p	COL4A1	1282
hsa-miR-140-3p	GPC1	2817
hsa-miR-140-3p	FN1	2335
hsa-miR-140-3p	ATP8A1	10396
hsa-miR-148b-3p	BCL2L11	10018
hsa-miR-148b-3p	TUBE1	51175
hsa-miR-148b-3p	ARFIP1	27236
hsa-miR-148b-3p	CTSL	1514
hsa-miR-148b-3p	CNTN4	152330
hsa-miR-148b-3p	MITF	4286
hsa-miR-148b-3p	FXR1	8087
hsa-miR-148b-3p	SYT4	6860
hsa-miR-148b-3p	MRAS	22808
hsa-miR-148b-3p	MIER1	57708
hsa-miR-148b-3p	MED12L	116931
hsa-miR-148b-3p	ESRRG	2104
hsa-miR-148b-3p	FBXO11	80204
hsa-miR-148b-3p	GPM6A	2823
hsa-miR-148b-3p	ROBO1	6091
hsa-miR-148b-3p	LDLR	3949
hsa-miR-148b-3p	LBR	3930
hsa-miR-148b-3p	TCF4	6925
hsa-miR-148b-3p	MMP15	4324
hsa-miR-148b-3p	NFAT5	10725
hsa-miR-148b-3p	MTMR10	54893
hsa-miR-148b-3p	C12orf4	57102
hsa-miR-148b-3p	ELF5	2001
hsa-miR-148b-3p	TMEM136	219902
hsa-miR-148b-3p	OPA1	4976
hsa-miR-148b-3p	SLC16A6	9120
hsa-miR-148b-3p	CCT6A	908
hsa-miR-148b-3p	SLC7A5	8140
hsa-miR-148b-3p	MAFF	23764
hsa-miR-148b-3p	RSBN1L	222194
hsa-miR-148b-3p	FAM104A	84923
hsa-miR-148b-3p	ASPH	444
hsa-miR-148b-3p	C5orf24	134553
hsa-miR-148b-3p	MDM4	4194
hsa-miR-148b-3p	USP4	7375
hsa-miR-148b-3p	PRNP	5621
hsa-miR-148b-3p	LDB3	11155
hsa-miR-148b-3p	EPB41L5	57669
hsa-miR-148b-3p	MTMR9	66036
hsa-miR-148b-3p	ZNF445	353274
hsa-miR-148b-3p	CTSA	5476
hsa-miR-148b-3p	PHACTR2	9749
hsa-miR-148b-3p	FMR1	2332
hsa-miR-148b-3p	NPTN	27020
hsa-miR-148b-3p	ZDHHC3	51304
hsa-miR-148b-3p	TMED7	51014
hsa-miR-148b-3p	FZD6	8323
hsa-miR-148b-3p	ZBTB1	22890
hsa-miR-148b-3p	UHMK1	127933
hsa-miR-148b-3p	ETS1	2113
hsa-miR-148b-3p	GTF2H1	2965
hsa-miR-148b-3p	ROBO2	6092
hsa-miR-148b-3p	LIPA	3988
hsa-miR-148b-3p	SMIM12	113444
hsa-miR-148b-3p	MNT	4335
hsa-miR-148b-3p	MAGOHB	55110
hsa-miR-148b-3p	SLC24A3	57419
hsa-miR-148b-3p	MAGI1	9223
hsa-miR-148b-3p	CFL2	1073
hsa-miR-148b-3p	CXorf23	256643
hsa-miR-148b-3p	BTBD3	22903
hsa-miR-148b-3p	ATP4B	496
hsa-miR-148b-3p	MEF2A	4205
hsa-miR-148b-3p	WNT1	7471
hsa-miR-148b-3p	PTEN	5728
hsa-miR-148b-3p	TBL1XR1	79718
hsa-miR-148b-3p	BMP8A	353500
hsa-miR-148b-3p	KIAA0232	9778
hsa-miR-148b-3p	LRP2	4036
hsa-miR-148b-3p	ST8SIA3	51046
hsa-miR-148b-3p	GADD45A	1647
hsa-miR-148b-3p	MMP10	4319
hsa-miR-148b-3p	TERF2	7014
hsa-miR-148b-3p	FAM168B	130074
hsa-miR-148b-3p	CHD9	80205
hsa-miR-148b-3p	IGF1	3479
hsa-miR-148b-3p	SGCB	6443
hsa-miR-148b-3p	NAP1L1	4673
hsa-miR-148b-3p	ZDHHC7	55625
hsa-miR-148b-3p	USP31	57478
hsa-miR-148b-3p	SRSF11	9295
hsa-miR-148b-3p	COL2A1	1280
hsa-miR-148b-3p	CDC14A	8556
hsa-miR-148b-3p	TRIM59	286827
hsa-miR-148b-3p	CDK19	23097
hsa-miR-148b-3p	BAI3	577
hsa-miR-148b-3p	VPS37A	137492
hsa-miR-148b-3p	WNT10B	7480
hsa-miR-148b-3p	PTGER3	5733
hsa-miR-148b-3p	KIAA1549	57670
hsa-miR-148b-3p	DNAJC5	80331
hsa-miR-148b-3p	C2orf80	389073
hsa-miR-148b-3p	MAFB	9935
hsa-miR-148b-3p	MXD1	4084
hsa-miR-148b-3p	ADAM22	53616
hsa-miR-148b-3p	SAR1B	51128
hsa-miR-148b-3p	MCMDC2	157777
hsa-miR-148b-3p	MMP13	4322
hsa-miR-148b-3p	DGKE	8526
hsa-miR-148b-3p	TNFRSF1B	7133
hsa-miR-148b-3p	GPATCH8	23131
hsa-miR-148b-3p	SLC5A7	60482
hsa-miR-148b-3p	SIK1	150094
hsa-miR-148b-3p	ULBP1	80329
hsa-miR-148b-3p	SNRPD1	6632
hsa-miR-148b-3p	TMEM132B	114795
hsa-miR-148b-3p	NPTX1	4884
hsa-miR-148b-3p	NUP133	55746
hsa-miR-148b-3p	ARRDC3	57561
hsa-miR-148b-3p	GPR116	221395
hsa-miR-148b-3p	COL4A1	1282
hsa-miR-148b-3p	NRP1	8829
hsa-miR-148b-3p	SERBP1	26135
hsa-miR-148b-3p	ZNF546	339327
hsa-miR-148b-3p	FBXO28	23219
hsa-miR-148b-3p	CCKBR	887
hsa-miR-148b-3p	YWHAB	7529
hsa-miR-148b-3p	PTPN14	5784
hsa-miR-148b-3p	RASSF8	11228
hsa-miR-148b-3p	WDFY4	57705
hsa-miR-148b-3p	RAB34	83871
hsa-miR-148b-3p	CNTNAP3B	728577
hsa-miR-148b-3p	HOXC8	3224
hsa-miR-148b-3p	ATP8A1	10396
hsa-miR-148b-3p	MAFG	4097
hsa-miR-148b-3p	GLRX5	51218
hsa-miR-148b-3p	DMXL1	1657
hsa-miR-148b-3p	ZNF709	163051
hsa-miR-148b-3p	MTF1	4520
hsa-miR-148b-3p	MPDZ	8777
hsa-miR-148b-3p	UBE2D1	7321
hsa-miR-148b-3p	ARL6IP1	23204
hsa-miR-148b-3p	TRAK2	66008
hsa-miR-148b-3p	PPM1L	151742
hsa-miR-148b-3p	VMP1	81671
hsa-miR-148b-3p	SOS2	6655
hsa-miR-148b-3p	LYSMD3	116068
hsa-miR-148b-3p	CTTNBP2NL	55917
hsa-miR-148b-3p	EMP1	2012
hsa-miR-148b-3p	OTX2	5015
hsa-miR-148b-3p	B4GALT6	9331
hsa-miR-148b-3p	CDK5R1	8851
hsa-miR-148b-3p	CRISP1	167
hsa-miR-148b-3p	AHDC1	27245
hsa-miR-148b-3p	TRIM2	23321
hsa-miR-148b-3p	C20orf112	140688
hsa-miR-148b-3p	LRP8	7804
hsa-miR-148b-3p	RHD	6007
hsa-miR-148b-3p	USP48	84196
hsa-miR-148b-3p	TMEM242	729515
hsa-miR-148b-3p	IL6ST	3572
hsa-miR-148b-3p	ATP6AP2	10159
hsa-miR-148b-3p	PHAX	51808
hsa-miR-148b-3p	DLG2	1740
hsa-miR-148b-3p	DCP2	167227
hsa-miR-148b-3p	ATP11A	23250
hsa-miR-148b-3p	MLF1IP	79682
hsa-miR-148b-3p	RNF38	152006
hsa-miR-148b-3p	IKBKB	3551
hsa-miR-148b-3p	MRGPRX3	117195
hsa-miR-148b-3p	GCFC2	6936
hsa-miR-148b-3p	SERPINE1	5054
hsa-miR-148b-3p	HBS1L	10767
hsa-miR-148b-3p	C1GALT1	56913
hsa-miR-148b-3p	EMR1	2015
hsa-miR-148b-3p	RBM24	221662
hsa-miR-148b-3p	QKI	9444
hsa-miR-148b-3p	SNAP91	9892
hsa-miR-148b-3p	TGOLN2	10618
hsa-miR-148b-3p	TNRC6A	27327
hsa-miR-148b-3p	ZDHHC17	23390
hsa-miR-148b-3p	MAP3K4	4216
hsa-miR-148b-3p	ITGA11	22801
hsa-miR-148b-3p	SRRM4	84530
hsa-miR-148b-3p	TMEM178B	100507421
hsa-miR-148b-3p	PSMC2	5701
hsa-miR-148b-3p	IL15	3600
hsa-miR-148b-3p	ERRFI1	54206
hsa-miR-148b-3p	VSIG10	54621
hsa-miR-148b-3p	C3orf58	205428
hsa-miR-148b-3p	NPTX2	4885
hsa-miR-148b-3p	NPEPL1	79716
hsa-miR-148b-3p	CABP7	164633
hsa-miR-148b-3p	NIPA1	123606
hsa-miR-148b-3p	LMAN1	3998
hsa-miR-148b-3p	SLC26A4	5172
hsa-miR-148b-3p	PNPLA6	10908
hsa-miR-148b-3p	CD177	57126
hsa-miR-148b-3p	EPG5	57724
hsa-miR-148b-3p	ERBB3	2065
hsa-miR-148b-3p	CDK14	5218
hsa-miR-148b-3p	DNMT1	1786
hsa-miR-148b-3p	B4GALT5	9334
hsa-miR-148b-3p	TRAF3IP1	26146
hsa-miR-148b-3p	FUT9	10690
hsa-miR-148b-3p	ITSN2	50618
hsa-miR-148b-3p	LEPROTL1	23484
hsa-miR-148b-3p	C5orf30	90355
hsa-miR-148b-3p	ABCD3	5825
hsa-miR-148b-3p	INHBB	3625
hsa-miR-148b-3p	PGRMC2	10424
hsa-miR-148b-3p	LZTFL1	54585
hsa-miR-148b-3p	UBA6	55236
hsa-miR-148b-3p	NPY1R	4886
hsa-miR-148b-3p	SYNJ1	8867
hsa-miR-148b-3p	ABCB7	22
hsa-miR-148b-3p	MLLT10	8028
hsa-miR-148b-3p	PRICKLE2	166336
hsa-miR-148b-3p	GBP3	2635
hsa-miR-148b-3p	TGFA	7039
hsa-miR-148b-3p	PFAS	5198
hsa-miR-148b-3p	KCTD16	57528
hsa-miR-148b-3p	XPO4	64328
hsa-miR-148b-3p	PIGA	5277
hsa-miR-148b-3p	S1PR1	1901
hsa-miR-148b-3p	PLAA	9373
hsa-miR-148b-3p	GLIPR1	11010
hsa-miR-148b-3p	AK2	204
hsa-miR-148b-3p	MMD	23531
hsa-miR-148b-3p	CHUK	1147
hsa-miR-148b-3p	ROCK1	6093
hsa-miR-148b-3p	SESTD1	91404
hsa-miR-148b-3p	RBMS2	5939
hsa-miR-148b-3p	ITGA5	3678
hsa-miR-148b-3p	MEOX2	4223
hsa-miR-148b-3p	INO80	54617
hsa-miR-148b-3p	ALCAM	214
hsa-miR-148b-3p	CCDC6	8030
hsa-miR-148b-3p	ZFYVE26	23503
hsa-miR-148b-3p	GNS	2799
hsa-miR-148b-3p	ZNF594	84622
hsa-miR-148b-3p	KIAA1430	57587
hsa-miR-148b-3p	GREM2	64388
hsa-miR-148b-3p	UBN2	254048
hsa-miR-148b-3p	PIK3C2A	5286
hsa-miR-148b-3p	HOMER1	9456
hsa-miR-148b-3p	AGO1	26523
hsa-miR-148b-3p	AKAP11	11215
hsa-miR-148b-3p	DDAH1	23576
hsa-miR-148b-3p	CLCN6	1185
hsa-miR-148b-3p	SLC2A1	6513
hsa-miR-148b-3p	ITPK1	3705
hsa-miR-148b-3p	OTUD4	54726
hsa-miR-148b-3p	CAND1	55832
hsa-miR-148b-3p	PAPSS2	9060
hsa-miR-148b-3p	ATP1A2	477
hsa-miR-148b-3p	CUL5	8065
hsa-miR-148b-3p	CCDC170	80129
hsa-miR-148b-3p	AGO4	192670
hsa-miR-148b-3p	USP32	84669
hsa-miR-148b-3p	HSP90B1	7184
hsa-miR-148b-3p	PITPNM2	57605
hsa-miR-148b-3p	YTHDC2	64848
hsa-miR-148b-3p	VSIG1	340547
hsa-miR-148b-3p	PKD2	5311
hsa-miR-148b-3p	FEZ2	9637
hsa-miR-148b-3p	UBAP2L	9898
hsa-miR-148b-3p	A4GNT	51146
hsa-miR-148b-3p	SSR1	6745
hsa-miR-148b-3p	OSBPL11	114885
hsa-miR-148b-3p	MAP3K9	4293
hsa-miR-148b-3p	DNAJB12	54788
hsa-miR-148b-3p	TMEM9B	56674
hsa-miR-148b-3p	DSC2	1824
hsa-miR-148b-3p	TMEM50B	757
hsa-miR-148b-3p	JMY	133746
hsa-miR-148b-3p	PPP1R10	5514
hsa-miR-148b-3p	KIAA1468	57614
hsa-miR-148b-3p	CCDC71	64925
hsa-miR-148b-3p	ST18	9705
hsa-miR-148b-3p	FLT1	2321
hsa-miR-148b-3p	SLC25A44	9673
hsa-miR-148b-3p	MGAT4A	11320
hsa-miR-148b-3p	HLA-G	3135
hsa-miR-148b-3p	PIK3CA	5290
hsa-miR-148b-3p	NRAS	4893
hsa-miR-148b-3p	CSF1	1435
hsa-miR-148b-3p	PRKAB1	5564
hsa-miR-148b-3p	ACVR1	90
hsa-miR-148b-3p	HSP90AA1	3320
hsa-miR-148b-3p	HOTAIR	100124700
hsa-miR-148b-3p	MLH1	4292
hsa-miR-148b-3p	PIK3R3	8503
hsa-miR-148b-3p	CYBB	1536
hsa-miR-152-3p	PHACTR2	9749
hsa-miR-152-3p	CRISP1	167
hsa-miR-152-3p	FAM104A	84923
hsa-miR-152-3p	LDLR	3949
hsa-miR-152-3p	GCFC2	6936
hsa-miR-152-3p	NAP1L1	4673
hsa-miR-152-3p	ZNF274	10782
hsa-miR-152-3p	NUP133	55746
hsa-miR-152-3p	RTN4	57142
hsa-miR-152-3p	ERBB3	2065
hsa-miR-152-3p	PITPNM2	57605
hsa-miR-152-3p	VSIG1	340547
hsa-miR-152-3p	ESRRG	2104
hsa-miR-152-3p	PIGA	5277
hsa-miR-152-3p	CCT6A	908
hsa-miR-152-3p	SNAP91	9892
hsa-miR-152-3p	MAFF	23764
hsa-miR-152-3p	FMR1	2332
hsa-miR-152-3p	BCL2L11	10018
hsa-miR-152-3p	NPTN	27020
hsa-miR-152-3p	ZDHHC17	23390
hsa-miR-152-3p	CCKBR	887
hsa-miR-152-3p	JMY	133746
hsa-miR-152-3p	MITF	4286
hsa-miR-152-3p	LRP8	7804
hsa-miR-152-3p	PTGER3	5733
hsa-miR-152-3p	RASSF8	11228
hsa-miR-152-3p	ERMP1	79956
hsa-miR-152-3p	MIER1	57708
hsa-miR-152-3p	RBMS2	5939
hsa-miR-152-3p	CEP63	80254
hsa-miR-152-3p	AGFG1	3267
hsa-miR-152-3p	TCF4	6925
hsa-miR-152-3p	LMAN1	3998
hsa-miR-152-3p	ZDHHC3	51304
hsa-miR-152-3p	GLRX5	51218
hsa-miR-152-3p	GADD45A	1647
hsa-miR-152-3p	C3orf58	205428
hsa-miR-152-3p	OPA1	4976
hsa-miR-152-3p	SYNJ1	8867
hsa-miR-152-3p	TNFRSF1B	7133
hsa-miR-152-3p	QKI	9444
hsa-miR-152-3p	TNRC6B	23112
hsa-miR-152-3p	CDC14A	8556
hsa-miR-152-3p	FAM168B	130074
hsa-miR-152-3p	KIAA0232	9778
hsa-miR-152-3p	SMIM12	113444
hsa-miR-152-3p	TGFA	7039
hsa-miR-152-3p	NPTX1	4884
hsa-miR-152-3p	PNPLA6	10908
hsa-miR-152-3p	CTTNBP2NL	55917
hsa-miR-152-3p	SLC24A3	57419
hsa-miR-152-3p	ESR1	2099
hsa-miR-152-3p	EPB41L5	57669
hsa-miR-152-3p	PIK3C2A	5286
hsa-miR-152-3p	CLCN3	1182
hsa-miR-152-3p	GPM6A	2823
hsa-miR-152-3p	LEPROTL1	23484
hsa-miR-152-3p	VPS37A	137492
hsa-miR-152-3p	MLLT10	8028
hsa-miR-152-3p	PTPN14	5784
hsa-miR-152-3p	ITGA11	22801
hsa-miR-152-3p	RHD	6007
hsa-miR-152-3p	ULBP1	80329
hsa-miR-152-3p	IGF1	3479
hsa-miR-152-3p	LRP2	4036
hsa-miR-152-3p	PHAX	51808
hsa-miR-152-3p	DMXL1	1657
hsa-miR-152-3p	GPR116	221395
hsa-miR-152-3p	SLC13A2	9058
hsa-miR-152-3p	UBE2D1	7321
hsa-miR-152-3p	GPATCH8	23131
hsa-miR-152-3p	NRP1	8829
hsa-miR-152-3p	SIK1	150094
hsa-miR-152-3p	MAFB	9935
hsa-miR-152-3p	C1GALT1	56913
hsa-miR-152-3p	USP31	57478
hsa-miR-152-3p	ZNF445	353274
hsa-miR-152-3p	PKD2	5311
hsa-miR-152-3p	COL2A1	1280
hsa-miR-152-3p	GTF2H1	2965
hsa-miR-152-3p	ARFIP1	27236
hsa-miR-152-3p	MMD	23531
hsa-miR-152-3p	CHUK	1147
hsa-miR-152-3p	FXR1	8087
hsa-miR-152-3p	MRAS	22808
hsa-miR-152-3p	RAB34	83871
hsa-miR-152-3p	ROBO1	6091
hsa-miR-152-3p	DNAJC5	80331
hsa-miR-152-3p	MXD1	4084
hsa-miR-152-3p	ATP6AP2	10159
hsa-miR-152-3p	ADAM22	53616
hsa-miR-152-3p	ERRFI1	54206
hsa-miR-152-3p	DNMT1	1786
hsa-miR-152-3p	PAPSS2	9060
hsa-miR-152-3p	USP4	7375
hsa-miR-152-3p	FEZ2	9637
hsa-miR-152-3p	DCUN1D4	23142
hsa-miR-152-3p	CDK5R1	8851
hsa-miR-152-3p	CABP7	164633
hsa-miR-152-3p	UBAP2L	9898
hsa-miR-152-3p	SERBP1	26135
hsa-miR-152-3p	TGOLN2	10618
hsa-miR-152-3p	AK2	204
hsa-miR-152-3p	TMEM132B	114795
hsa-miR-152-3p	SERPINE1	5054
hsa-miR-152-3p	CD177	57126
hsa-miR-152-3p	ARRDC3	57561
hsa-miR-152-3p	KIAA1549	57670
hsa-miR-152-3p	BMP8A	353500
hsa-miR-152-3p	CTSA	5476
hsa-miR-152-3p	COL4A1	1282
hsa-miR-152-3p	HOXC8	3224
hsa-miR-152-3p	DDAH1	23576
hsa-miR-152-3p	C20orf112	140688
hsa-miR-152-3p	USP48	84196
hsa-miR-152-3p	SLC5A7	60482
hsa-miR-152-3p	VMP1	81671
hsa-miR-152-3p	MAFG	4097
hsa-miR-152-3p	PGRMC2	10424
hsa-miR-152-3p	VSIG10	54621
hsa-miR-152-3p	DSC2	1824
hsa-miR-152-3p	RBM24	221662
hsa-miR-152-3p	YWHAB	7529
hsa-miR-152-3p	ST18	9705
hsa-miR-152-3p	PRICKLE2	166336
hsa-miR-152-3p	DGCR2	9993
hsa-miR-152-3p	AKAP11	11215
hsa-miR-152-3p	LYSMD3	116068
hsa-miR-152-3p	LIPA	3988
hsa-miR-152-3p	SLC26A4	5172
hsa-miR-152-3p	WDFY4	57705
hsa-miR-152-3p	C2orf80	389073
hsa-miR-152-3p	ROBO2	6092
hsa-miR-152-3p	IL6ST	3572
hsa-miR-152-3p	AHDC1	27245
hsa-miR-152-3p	PPM1L	151742
hsa-miR-152-3p	FZD6	8323
hsa-miR-152-3p	C5orf30	90355
hsa-miR-152-3p	TRAK2	66008
hsa-miR-152-3p	GNS	2799
hsa-miR-152-3p	IKBKB	3551
hsa-miR-152-3p	MDM4	4194
hsa-miR-152-3p	UBA6	55236
hsa-miR-152-3p	ELF5	2001
hsa-miR-152-3p	SECISBP2L	9728
hsa-miR-152-3p	ARL6IP1	23204
hsa-miR-152-3p	B4GALT5	9334
hsa-miR-152-3p	DCP2	167227
hsa-miR-152-3p	ASPH	444
hsa-miR-152-3p	MRGPRX3	117195
hsa-miR-152-3p	WNT1	7471
hsa-miR-152-3p	PFAS	5198
hsa-miR-152-3p	CNTNAP3B	728577
hsa-miR-152-3p	PRNP	5621
hsa-miR-152-3p	SGCB	6443
hsa-miR-152-3p	IL15	3600
hsa-miR-152-3p	TNRC6A	27327
hsa-miR-152-3p	SZRD1	26099
hsa-miR-152-3p	CNTN4	152330
hsa-miR-152-3p	MMP10	4319
hsa-miR-152-3p	ROCK1	6093
hsa-miR-152-3p	MAGI1	9223
hsa-miR-152-3p	SESTD1	91404
hsa-miR-152-3p	MLF1IP	79682
hsa-miR-152-3p	MEOX2	4223
hsa-miR-152-3p	INO80	54617
hsa-miR-152-3p	SPTLC3	55304
hsa-miR-152-3p	ATP11A	23250
hsa-miR-152-3p	PLAA	9373
hsa-miR-152-3p	AGO4	192670
hsa-miR-152-3p	TRAF3IP1	26146
hsa-miR-152-3p	NIPA1	123606
hsa-miR-152-3p	WNT10B	7480
hsa-miR-152-3p	GLIPR1	11010
hsa-miR-152-3p	EPG5	57724
hsa-miR-152-3p	TMEM178B	100507421
hsa-miR-152-3p	S1PR1	1901
hsa-miR-152-3p	SKP1	6500
hsa-miR-152-3p	INHBB	3625
hsa-miR-152-3p	ITSN2	50618
hsa-miR-152-3p	CLCN6	1185
hsa-miR-152-3p	MMP13	4322
hsa-miR-152-3p	DGKE	8526
hsa-miR-152-3p	SLC2A1	6513
hsa-miR-152-3p	SRSF11	9295
hsa-miR-152-3p	CCDC6	8030
hsa-miR-152-3p	NPEPL1	79716
hsa-miR-152-3p	OTUD4	54726
hsa-miR-152-3p	ZDHHC7	55625
hsa-miR-152-3p	UBN2	254048
hsa-miR-152-3p	ABCB7	22
hsa-miR-152-3p	HOMER1	9456
hsa-miR-152-3p	BTBD3	22903
hsa-miR-152-3p	ATP4B	496
hsa-miR-152-3p	LDB3	11155
hsa-miR-152-3p	XPO4	64328
hsa-miR-152-3p	SNRPD1	6632
hsa-miR-152-3p	ITGA5	3678
hsa-miR-152-3p	MTF1	4520
hsa-miR-152-3p	MPDZ	8777
hsa-miR-152-3p	SSR1	6745
hsa-miR-152-3p	ZBTB1	22890
hsa-miR-152-3p	CUL5	8065
hsa-miR-152-3p	OSBPL11	114885
hsa-miR-152-3p	FBXO33	254170
hsa-miR-152-3p	ZNF594	84622
hsa-miR-152-3p	MAP3K9	4293
hsa-miR-152-3p	HBS1L	10767
hsa-miR-152-3p	DNAJB12	54788
hsa-miR-152-3p	CAND1	55832
hsa-miR-152-3p	SUMF1	285362
hsa-miR-152-3p	OTX2	5015
hsa-miR-152-3p	ATP1A2	477
hsa-miR-152-3p	TRIM2	23321
hsa-miR-152-3p	AGO1	26523
hsa-miR-152-3p	CDK19	23097
hsa-miR-152-3p	BAI3	577
hsa-miR-152-3p	NR2C2AP	126382
hsa-miR-152-3p	PPP1R10	5514
hsa-miR-152-3p	KCTD16	57528
hsa-miR-152-3p	GREM2	64388
hsa-miR-152-3p	SOS2	6655
hsa-miR-152-3p	LBR	3930
hsa-miR-152-3p	SAR1B	51128
hsa-miR-152-3p	TMED7	51014
hsa-miR-152-3p	CTSL	1514
hsa-miR-152-3p	SYT4	6860
hsa-miR-152-3p	B4GALT6	9331
hsa-miR-152-3p	MED12L	116931
hsa-miR-152-3p	SLC25A44	9673
hsa-miR-152-3p	CXorf23	256643
hsa-miR-152-3p	USP32	84669
hsa-miR-152-3p	MMP15	4324
hsa-miR-152-3p	MAGOHB	55110
hsa-miR-152-3p	TMEM9B	56674
hsa-miR-152-3p	EMP1	2012
hsa-miR-152-3p	TMEM50B	757
hsa-miR-152-3p	ZFYVE26	23503
hsa-miR-152-3p	FBXO28	23219
hsa-miR-152-3p	CAST	831
hsa-miR-152-3p	UHMK1	127933
hsa-miR-152-3p	KIAA1430	57587
hsa-miR-152-3p	YTHDC2	64848
hsa-miR-152-3p	ETS1	2113
hsa-miR-152-3p	PSMC2	5701
hsa-miR-152-3p	A4GNT	51146
hsa-miR-152-3p	ST8SIA3	51046
hsa-miR-152-3p	MCMDC2	157777
hsa-miR-152-3p	NPTX2	4885
hsa-miR-152-3p	SLC7A5	8140
hsa-miR-152-3p	TMEM52B	120939
hsa-miR-152-3p	CCDC170	80129
hsa-miR-152-3p	TRIM59	286827
hsa-miR-152-3p	MNT	4335
hsa-miR-152-3p	C12orf4	57102
hsa-miR-152-3p	EMR1	2015
hsa-miR-152-3p	CDK14	5218
hsa-miR-152-3p	PTEN	5728
hsa-miR-152-3p	TBL1XR1	79718
hsa-miR-152-3p	ABCD3	5825
hsa-miR-152-3p	FLT1	2321
hsa-miR-152-3p	TUBE1	51175
hsa-miR-152-3p	NPY1R	4886
hsa-miR-152-3p	TERF2	7014
hsa-miR-152-3p	HLA-G	3135
hsa-miR-152-3p	IRS1	3667
hsa-miR-152-3p	IGF1R	3480
hsa-miR-152-3p	CSF1	1435
hsa-miR-152-3p	KRAS	3845
hsa-miR-152-3p	CD151	977
hsa-miR-152-3p	ADAM17	6868
hsa-miR-152-3p	KLF4	9314
hsa-miR-152-3p	FGF2	2247
hsa-miR-152-3p	FGFR3	2261
hsa-miR-152-3p	TACC3	10460
hsa-miR-152-3p	CCND1	595
hsa-miR-152-3p	XIST	7503
hsa-miR-152-3p	ALCAM	214
hsa-miR-152-3p	CD274	29126
hsa-miR-152-3p	ATG14	22863
hsa-miR-152-3p	DKK1	22943
hsa-miR-152-3p	PIK3R3	8503
hsa-miR-210-3p	CACNA1C	775
hsa-miR-210-3p	ALDH5A1	7915
hsa-miR-210-3p	ACVR1B	91
hsa-miR-210-3p	GEMIN8	54960
hsa-miR-210-3p	ATP11A	23250
hsa-miR-210-3p	SPRED2	200734
hsa-miR-210-3p	CEND1	51286
hsa-miR-210-3p	MSANTD1	345222
hsa-miR-210-3p	IGF2	3481
hsa-miR-210-3p	METTL13	51603
hsa-miR-210-3p	PSAP	5660
hsa-miR-210-3p	FGFRL1	53834
hsa-miR-210-3p	GGNBP2	79893
hsa-miR-210-3p	SDF2	6388
hsa-miR-210-3p	HOXA9	3205
hsa-miR-210-3p	TP53I11	9537
hsa-miR-210-3p	PIM1	5292
hsa-miR-210-3p	HOXA1	3198
hsa-miR-210-3p	RAD52	5893
hsa-miR-210-3p	NPTX1	4884
hsa-miR-210-3p	EFNA3	1944
hsa-miR-210-3p	BDNF	627
hsa-miR-210-3p	PTPN1	5770
hsa-miR-210-3p	P4HB	5034
hsa-miR-210-3p	NCAM1	4684
hsa-miR-210-3p	ISCU	23479
hsa-miR-210-3p	GPD1L	23171
hsa-miR-210-3p	CPEB2	132864
hsa-miR-210-3p	XIST	7503
hsa-miR-210-3p	DDAH1	23576
hsa-miR-210-3p	E2F3	1871
hsa-miR-210-3p	MNT	4335
hsa-miR-210-3p	AIFM3	150209
hsa-miR-210-3p	CASP8AP2	9994
hsa-miR-210-3p	VMP1	81671
hsa-miR-210-3p	TFRC	7037
hsa-miR-210-3p	HSD17B1	3292
hsa-miR-210-3p	NDUFA4	4697
hsa-miR-210-3p	SDHD	6392
hsa-miR-210-3p	STMN1	3925
hsa-miR-210-3p	DIMT1	27292
hsa-miR-210-3p	PTBP3	9991
hsa-miR-210-3p	FOXN3	1112
hsa-miR-210-3p	MCM3	4172
hsa-miR-210-3p	IGFBP3	3486
hsa-miR-210-3p	COL4A2	1284
hsa-miR-210-3p	INPP5A	3632
hsa-miR-210-3p	EHD2	30846
hsa-miR-210-3p	SH3BGRL	6451
hsa-miR-210-3p	PTPN2	5771
hsa-miR-210-3p	LDHA	3939
hsa-miR-210-3p	LDHB	3945
hsa-miR-210-3p	HIF1A	3091
hsa-miR-210-3p	FOXP3	50943
hsa-miR-210-3p	HIF3A	64344
hsa-miR-210-3p	BNIP3	664
hsa-miR-210-3p	KCMF1	56888
hsa-miR-210-3p	BTK	695
hsa-miR-210-3p	Fgfrl1	116701
hsa-miR-210-3p	ATG7	10533
hsa-miR-210-3p	PLK1	5347
hsa-miR-210-3p	TWIST1	7291
hsa-miR-210-3p	THSD7A	221981
hsa-miR-34a-5p	GPR85	54329
hsa-miR-34a-5p	FAM76A	199870
hsa-miR-34a-5p	AGTR1	185
hsa-miR-34a-5p	E2F5	1875
hsa-miR-34a-5p	RAP1GDS1	5910
hsa-miR-34a-5p	PALLD	23022
hsa-miR-34a-5p	RRAS	6237
hsa-miR-34a-5p	TBL1XR1	79718
hsa-miR-34a-5p	POGZ	23126
hsa-miR-34a-5p	C7orf49	78996
hsa-miR-34a-5p	ZNF551	90233
hsa-miR-34a-5p	CACNA1C	775
hsa-miR-34a-5p	NFATC4	4776
hsa-miR-34a-5p	B3GALNT1	8706
hsa-miR-34a-5p	CSF1R	1436
hsa-miR-34a-5p	ZDHHC17	23390
hsa-miR-34a-5p	PGM1	5236
hsa-miR-34a-5p	NOS1AP	9722
hsa-miR-34a-5p	LDHA	3939
hsa-miR-34a-5p	GALNT7	51809
hsa-miR-34a-5p	ERGIC1	57222
hsa-miR-34a-5p	HMGCS1	3157
hsa-miR-34a-5p	SNCA	6622
hsa-miR-34a-5p	FOSL1	8061
hsa-miR-34a-5p	THUMPD3	25917
hsa-miR-34a-5p	ELMSAN1	91748
hsa-miR-34a-5p	AMER1	139285
hsa-miR-34a-5p	CBFA2T3	863
hsa-miR-34a-5p	PPM1A	5494
hsa-miR-34a-5p	TOB2	10766
hsa-miR-34a-5p	PLAG1	5324
hsa-miR-34a-5p	NRIP3	56675
hsa-miR-34a-5p	PLA2G2F	64600
hsa-miR-34a-5p	MDM4	4194
hsa-miR-34a-5p	MYB	4602
hsa-miR-34a-5p	KDM5D	8284
hsa-miR-34a-5p	CACNB3	784
hsa-miR-34a-5p	DDX17	10521
hsa-miR-34a-5p	PDE7B	27115
hsa-miR-34a-5p	PPARGC1B	133522
hsa-miR-34a-5p	MMAB	326625
hsa-miR-34a-5p	CLCN3	1182
hsa-miR-34a-5p	C3orf58	205428
hsa-miR-34a-5p	ALDOA	226
hsa-miR-34a-5p	SATB1	6304
hsa-miR-34a-5p	ZFHX4	79776
hsa-miR-34a-5p	FAM208A	23272
hsa-miR-34a-5p	VPS37B	79720
hsa-miR-34a-5p	CACNA1E	777
hsa-miR-34a-5p	BRINP1	1620
hsa-miR-34a-5p	PPP1R16B	26051
hsa-miR-34a-5p	DNM1L	10059
hsa-miR-34a-5p	TMCC3	57458
hsa-miR-34a-5p	FGF23	8074
hsa-miR-34a-5p	LRRTM2	26045
hsa-miR-34a-5p	TBCK	93627
hsa-miR-34a-5p	SOGA1	140710
hsa-miR-34a-5p	CDH13	1012
hsa-miR-34a-5p	PPP2R3A	5523
hsa-miR-34a-5p	HPSE	10855
hsa-miR-34a-5p	PPP1R10	5514
hsa-miR-34a-5p	SAR1A	56681
hsa-miR-34a-5p	GINS3	64785
hsa-miR-34a-5p	CALB1	793
hsa-miR-34a-5p	DPYSL4	10570
hsa-miR-34a-5p	SEC61A1	29927
hsa-miR-34a-5p	SAMD12	401474
hsa-miR-34a-5p	SWT1	54823
hsa-miR-34a-5p	MBLAC1	255374
hsa-miR-34a-5p	EPHA4	2043
hsa-miR-34a-5p	PEG10	23089
hsa-miR-34a-5p	SCN2B	6327
hsa-miR-34a-5p	CSRNP3	80034
hsa-miR-34a-5p	ALG13	79868
hsa-miR-34a-5p	CCNE2	9134
hsa-miR-34a-5p	DMWD	1762
hsa-miR-34a-5p	FAM127B	26071
hsa-miR-34a-5p	SDK2	54549
hsa-miR-34a-5p	ISY1	57461
hsa-miR-34a-5p	HSPA1B	3304
hsa-miR-34a-5p	SSX5	6758
hsa-miR-34a-5p	PPFIA1	8500
hsa-miR-34a-5p	SPICE1	152185
hsa-miR-34a-5p	CR2	1380
hsa-miR-34a-5p	USP31	57478
hsa-miR-34a-5p	MET	4233
hsa-miR-34a-5p	RECK	8434
hsa-miR-34a-5p	CALCR	799
hsa-miR-34a-5p	STRN3	29966
hsa-miR-34a-5p	COL26A1	136227
hsa-miR-34a-5p	SMIM15	643155
hsa-miR-34a-5p	MTMR10	54893
hsa-miR-34a-5p	ALS2CL	259173
hsa-miR-34a-5p	ACSL4	2182
hsa-miR-34a-5p	RNASEL	6041
hsa-miR-34a-5p	TNRC6B	23112
hsa-miR-34a-5p	CCL22	6367
hsa-miR-34a-5p	LIMD2	80774
hsa-miR-34a-5p	SATB2	23314
hsa-miR-34a-5p	PALM2	114299
hsa-miR-34a-5p	NHS	4810
hsa-miR-34a-5p	ZMYM4	9202
hsa-miR-34a-5p	RCAN1	1827
hsa-miR-34a-5p	RGS17	26575
hsa-miR-34a-5p	MYCN	4613
hsa-miR-34a-5p	IGSF1	3547
hsa-miR-34a-5p	CDS2	8760
hsa-miR-34a-5p	DIEXF	27042
hsa-miR-34a-5p	TMEM167A	153339
hsa-miR-34a-5p	BTBD18	643376
hsa-miR-34a-5p	CRY2	1408
hsa-miR-34a-5p	PPP2R5A	5525
hsa-miR-34a-5p	KIAA1210	57481
hsa-miR-34a-5p	PKP4	8502
hsa-miR-34a-5p	CAPN6	827
hsa-miR-34a-5p	MGAT4A	11320
hsa-miR-34a-5p	SUV420H1	51111
hsa-miR-34a-5p	SLITRK4	139065
hsa-miR-34a-5p	TTC19	54902
hsa-miR-34a-5p	FUCA2	2519
hsa-miR-34a-5p	SYT1	6857
hsa-miR-34a-5p	SGPP1	81537
hsa-miR-34a-5p	FAM167A	83648
hsa-miR-34a-5p	DNAJC24	120526
hsa-miR-34a-5p	CIAO1	9391
hsa-miR-34a-5p	FOXP1	27086
hsa-miR-34a-5p	SERPINF2	5345
hsa-miR-34a-5p	DPP3	10072
hsa-miR-34a-5p	MYO5A	4644
hsa-miR-34a-5p	TMEM255A	55026
hsa-miR-34a-5p	GBA3	57733
hsa-miR-34a-5p	VAMP2	6844
hsa-miR-34a-5p	CDKL2	8999
hsa-miR-34a-5p	MED8	112950
hsa-miR-34a-5p	OLIG3	167826
hsa-miR-34a-5p	MSANTD3-TMEFF1	100526694
hsa-miR-34a-5p	DLG3	1741
hsa-miR-34a-5p	PRKCQ	5588
hsa-miR-34a-5p	CPSF6	11052
hsa-miR-34a-5p	PRKCB	5579
hsa-miR-34a-5p	KIAA1462	57608
hsa-miR-34a-5p	MYH9	4627
hsa-miR-34a-5p	CASP2	835
hsa-miR-34a-5p	ELL2	22936
hsa-miR-34a-5p	LEF1	51176
hsa-miR-34a-5p	ALG6	29929
hsa-miR-34a-5p	STX17	55014
hsa-miR-34a-5p	ANK3	288
hsa-miR-34a-5p	FUT8	2530
hsa-miR-34a-5p	TAF5	6877
hsa-miR-34a-5p	RPS6KL1	83694
hsa-miR-34a-5p	AHCYL2	23382
hsa-miR-34a-5p	PPAPDC1B	84513
hsa-miR-34a-5p	BTBD11	121551
hsa-miR-34a-5p	CNOT4	4850
hsa-miR-34a-5p	SLC25A27	9481
hsa-miR-34a-5p	ENAM	10117
hsa-miR-34a-5p	LGR4	55366
hsa-miR-34a-5p	KIT	3815
hsa-miR-34a-5p	METTL1	4234
hsa-miR-34a-5p	ASIC2	40
hsa-miR-34a-5p	INA	9118
hsa-miR-34a-5p	AGO4	192670
hsa-miR-34a-5p	CHD3	1107
hsa-miR-34a-5p	EME1	146956
hsa-miR-34a-5p	TPPP	11076
hsa-miR-34a-5p	MAP2K1	5604
hsa-miR-34a-5p	HCN3	57657
hsa-miR-34a-5p	TMEFF1	8577
hsa-miR-34a-5p	C9orf47	286223
hsa-miR-34a-5p	SC5D	6309
hsa-miR-34a-5p	CNTN2	6900
hsa-miR-34a-5p	ESYT3	83850
hsa-miR-34a-5p	FAM83A	84985
hsa-miR-34a-5p	IRGQ	126298
hsa-miR-34a-5p	OAZ2	4947
hsa-miR-34a-5p	FLOT2	2319
hsa-miR-34a-5p	SIRPB1	10326
hsa-miR-34a-5p	NOTCH1	4851
hsa-miR-34a-5p	LRRC40	55631
hsa-miR-34a-5p	EPS15L1	58513
hsa-miR-34a-5p	ADRA1D	146
hsa-miR-34a-5p	NUMBL	9253
hsa-miR-34a-5p	SDR9C7	121214
hsa-miR-34a-5p	ACVR2B	93
hsa-miR-34a-5p	PTGIS	5740
hsa-miR-34a-5p	PURB	5814
hsa-miR-34a-5p	TGIF2	60436
hsa-miR-34a-5p	NAIP	4671
hsa-miR-34a-5p	PEA15	8682
hsa-miR-34a-5p	FUT1	2523
hsa-miR-34a-5p	PLIN4	729359
hsa-miR-34a-5p	GABRA3	2556
hsa-miR-34a-5p	PPP1R11	6992
hsa-miR-34a-5p	FBXO30	84085
hsa-miR-34a-5p	RHOQ	23433
hsa-miR-34a-5p	NAV3	89795
hsa-miR-34a-5p	PLEKHH2	130271
hsa-miR-34a-5p	PAFAH1B2	5049
hsa-miR-34a-5p	PLN	5350
hsa-miR-34a-5p	PDGFRA	5156
hsa-miR-34a-5p	PACS1	55690
hsa-miR-34a-5p	TMEM35	59353
hsa-miR-34a-5p	MLLT1	4298
hsa-miR-34a-5p	THPO	7066
hsa-miR-34a-5p	CLDN18	51208
hsa-miR-34a-5p	DPYD	1806
hsa-miR-34a-5p	PEX2	5828
hsa-miR-34a-5p	KLRK1	22914
hsa-miR-34a-5p	PVRL1	5818
hsa-miR-34a-5p	MOAP1	64112
hsa-miR-34a-5p	COL4A4	1286
hsa-miR-34a-5p	RALGPS2	55103
hsa-miR-34a-5p	ARHGEF33	100271715
hsa-miR-34a-5p	GMFB	2764
hsa-miR-34a-5p	ITSN1	6453
hsa-miR-34a-5p	TSN	7247
hsa-miR-34a-5p	LDOC1L	84247
hsa-miR-34a-5p	ZNF281	23528
hsa-miR-34a-5p	NAV1	89796
hsa-miR-34a-5p	PFKM	5213
hsa-miR-34a-5p	SLC4A7	9497
hsa-miR-34a-5p	PLOD1	5351
hsa-miR-34a-5p	SEMA4F	10505
hsa-miR-34a-5p	FGD6	55785
hsa-miR-34a-5p	UBP1	7342
hsa-miR-34a-5p	RIMS3	9783
hsa-miR-34a-5p	ACSM2A	123876
hsa-miR-34a-5p	GK5	256356
hsa-miR-34a-5p	CHM	1121
hsa-miR-34a-5p	ASB4	51666
hsa-miR-34a-5p	XYLT1	64131
hsa-miR-34a-5p	SH3PXD2A	9644
hsa-miR-34a-5p	KCNK3	3777
hsa-miR-34a-5p	MEX3C	51320
hsa-miR-34a-5p	RUFY2	55680
hsa-miR-34a-5p	KLRC4-KLRK1	100528032
hsa-miR-34a-5p	OSGIN2	734
hsa-miR-34a-5p	GNAO1	2775
hsa-miR-34a-5p	TBRG1	84897
hsa-miR-34a-5p	CORO1C	23603
hsa-miR-34a-5p	UBE2QL1	134111
hsa-miR-34a-5p	PNOC	5368
hsa-miR-34a-5p	FOXJ2	55810
hsa-miR-34a-5p	BMP3	651
hsa-miR-34a-5p	UBXN10	127733
hsa-miR-34a-5p	ANKRD52	283373
hsa-miR-34a-5p	LYST	1130
hsa-miR-34a-5p	C16orf58	64755
hsa-miR-34a-5p	ASB1	51665
hsa-miR-34a-5p	GP5	2814
hsa-miR-34a-5p	XBP1	7494
hsa-miR-34a-5p	UCN2	90226
hsa-miR-34a-5p	FUT9	10690
hsa-miR-34a-5p	PKNOX1	5316
hsa-miR-34a-5p	2018-09-03	55964
hsa-miR-34a-5p	LRPAP1	4043
hsa-miR-34a-5p	VAT1	10493
hsa-miR-34a-5p	ZNF831	128611
hsa-miR-34a-5p	GRM7	2917
hsa-miR-34a-5p	JAG1	182
hsa-miR-34a-5p	MYC	4609
hsa-miR-34a-5p	CDK4	1019
hsa-miR-34a-5p	CDK6	1021
hsa-miR-34a-5p	CCND1	595
hsa-miR-34a-5p	WNT1	7471
hsa-miR-34a-5p	AXIN2	8313
hsa-miR-34a-5p	E2F3	1871
hsa-miR-34a-5p	DLL1	28514
hsa-miR-34a-5p	SIRT1	23411
hsa-miR-34a-5p	BCL2	596
hsa-miR-34a-5p	HNF4A	3172
hsa-miR-34a-5p	YY1	7528
hsa-miR-34a-5p	MAGEA12	4111
hsa-miR-34a-5p	MAGEA6	4105
hsa-miR-34a-5p	MAGEA3	4102
hsa-miR-34a-5p	MAGEA2	4101
hsa-miR-34a-5p	IFNB1	3456
hsa-miR-34a-5p	E2F1	1869
hsa-miR-34a-5p	NOTCH2	4853
hsa-miR-34a-5p	CD44	960
hsa-miR-34a-5p	ZAP70	7535
hsa-miR-34a-5p	NANOG	79923
hsa-miR-34a-5p	SOX2	6657
hsa-miR-34a-5p	IMPA1	3612
hsa-miR-34a-5p	IMPDH2	3615
hsa-miR-34a-5p	ULBP2	80328
hsa-miR-34a-5p	STX1A	6804
hsa-miR-34a-5p	EPHA5	2044
hsa-miR-34a-5p	AXL	558
hsa-miR-34a-5p	KLB	152831
hsa-miR-34a-5p	TP53	7157
hsa-miR-34a-5p	BMP7	655
hsa-miR-34a-5p	MTA2	9219
hsa-miR-34a-5p	GAS1	2619
hsa-miR-34a-5p	ACSL1	2180
hsa-miR-34a-5p	IGF2BP3	10643
hsa-miR-34a-5p	HDAC1	3065
hsa-miR-34a-5p	CDKN2C	1031
hsa-miR-34a-5p	SNAI1	6615
hsa-miR-34a-5p	CD24	100133941
hsa-miR-34a-5p	AR	367
hsa-miR-34a-5p	NAMPT	10135
hsa-miR-34a-5p	PDGFRB	5159
hsa-miR-34a-5p	BIRC5	332
hsa-miR-34a-5p	SRC	6714
hsa-miR-34a-5p	PCBP2	5094
hsa-miR-34a-5p	KDM4A	9682
hsa-miR-34a-5p	KCNH1	3756
hsa-miR-34a-5p	KLF4	9314
hsa-miR-34a-5p	INHBB	3625
hsa-miR-34a-5p	RICTOR	253260
hsa-miR-34a-5p	POU5F1	5460
hsa-miR-34a-5p	SMAD4	4089
hsa-miR-34a-5p	L1CAM	3897
hsa-miR-34a-5p	ARHGDIB	397
hsa-miR-34a-5p	CYBB	1536
hsa-miR-34a-5p	HOTAIR	100124700
hsa-miR-34a-5p	DGUOK	1716
hsa-miR-34a-5p	SIRT7	51547
hsa-miR-34a-5p	IL6R	3570
hsa-miR-34a-5p	TCF7	6932
hsa-miR-34a-5p	NUMB	8650
hsa-miR-34a-5p	GFRA3	2676
hsa-miR-34a-5p	KLF12	11278
hsa-miR-34a-5p	BAX	581
hsa-miR-34a-5p	PPARA	5465
hsa-miR-34a-5p	ATP5S	27109
hsa-miR-34a-5p	ATG4A	115201
hsa-miR-34a-5p	ATG4B	23192
hsa-miR-34a-5p	ATG4C	84938
hsa-miR-34a-5p	ATG4D	84971
hsa-miR-34a-5p	ATG5	9474
hsa-miR-34a-5p	ATG7	10533
hsa-miR-34a-5p	BECN1	8678
hsa-miR-34a-5p	ERBB2	2064
hsa-miR-34a-5p	STMN1	3925
hsa-miR-34a-5p	TREM2	54209
hsa-miR-34a-5p	PIK3CG	5294
hsa-miR-34a-5p	AKT1	207
hsa-miR-34a-5p	KCNH2	3757
hsa-miR-34a-5p	HNF4G	3174
hsa-miR-34a-5p	RBP2	5948
hsa-miR-34a-5p	FOS	2353
hsa-miR-34a-5p	NLRC5	84166
hsa-miR-34a-5p	RAD51	5888
hsa-miR-34a-5p	Crtc1	382056
hsa-miR-34a-5p	PAM	5066
hsa-miR-34a-5p	SIRT6	51548
hsa-miR-34a-5p	FKBP1B	2281
hsa-miR-34a-5p	PRKD1	5587
hsa-miR-34a-5p	AIP	9049
hsa-miR-34a-5p	NR4A2	4929
hsa-miR-34a-5p	GDF5	8200
hsa-miR-34a-5p	PPP1CC	5501
hsa-miR-34a-5p	HMGB1	3146
hsa-miR-493-3p	OPA1	4976
hsa-miR-493-3p	KCNK10	54207
hsa-miR-493-3p	TRIM45	80263
hsa-miR-493-3p	MDGA2	161357
hsa-miR-493-3p	MRVI1	10335
hsa-miR-493-3p	CIDEA	1149
hsa-miR-493-3p	RAB1A	5861
hsa-miR-493-3p	NLRP5	126206
hsa-miR-493-3p	CMKLR1	1240
hsa-miR-493-3p	ZNF292	23036
hsa-miR-493-3p	PDX1	3651
hsa-miR-493-3p	UPF2	26019
hsa-miR-493-3p	PEG10	23089
hsa-miR-493-3p	CSRNP3	80034
hsa-miR-493-3p	H2AFY	9555
hsa-miR-493-3p	IL17REL	400935
hsa-miR-493-3p	CMTM6	54918
hsa-miR-493-3p	TXNDC5	81567
hsa-miR-493-3p	DENND1B	163486
hsa-miR-493-3p	RAC1	5879
hsa-miR-493-3p	ANKRD29	147463
hsa-miR-493-3p	CSF2RB	1439
hsa-miR-493-3p	EMC1	23065
hsa-miR-493-3p	MXD1	4084
hsa-miR-493-3p	GIGYF2	26058
hsa-miR-493-3p	TOMM5	401505
hsa-miR-493-3p	PHIP	55023
hsa-miR-493-3p	MAP1LC3B	81631
hsa-miR-493-3p	TPRG1	285386
hsa-miR-493-3p	SLC13A1	6561
hsa-miR-493-3p	RPS23	6228
hsa-miR-493-3p	GAREML	150946
hsa-miR-493-3p	FGF13	2258
hsa-miR-493-3p	KIAA1549L	25758
hsa-miR-493-3p	C1orf21	81563
hsa-miR-493-3p	PCMTD2	55251
hsa-miR-493-3p	LRRC8C	84230
hsa-miR-493-3p	ABCB5	340273
hsa-miR-493-3p	STRN	6801
hsa-miR-493-3p	RYR2	6262
hsa-miR-493-3p	DPY30	84661
hsa-miR-493-3p	TMEM178B	100507421
hsa-miR-493-3p	MAB21L2	10586
hsa-miR-493-3p	SULF1	23213
hsa-miR-493-3p	TSPYL1	7259
hsa-miR-493-3p	WNT8A	7478
hsa-miR-493-3p	AMZ1	155185
hsa-miR-493-3p	MAD2L1	4085
hsa-miR-493-3p	POLDIP2	26073
hsa-miR-493-3p	ANTXR1	84168
hsa-miR-493-3p	NCOR1	9611
hsa-miR-493-3p	SMLR1	100507203
hsa-miR-493-3p	WDR33	55339
hsa-miR-493-3p	MS4A14	84689
hsa-miR-493-3p	DST	667
hsa-miR-493-3p	CPLX1	10815
hsa-miR-493-3p	MBTPS1	8720
hsa-miR-493-3p	ZNF135	7694
hsa-miR-493-3p	AFF1	4299
hsa-miR-493-3p	TLR7	51284
hsa-miR-493-3p	KRTAP4-1	85285
hsa-miR-493-3p	PPP4R1	9989
hsa-miR-493-3p	CELF5	60680
hsa-miR-493-3p	CD36	948
hsa-miR-493-3p	SF3A3	10946
hsa-miR-493-3p	RABEP1	9135
hsa-miR-493-3p	ANKRD1	27063
hsa-miR-493-3p	DCAF5	8816
hsa-miR-493-3p	SPATA13	221178
hsa-miR-493-3p	YTHDF2	51441
hsa-miR-493-3p	NXPE3	91775
hsa-miR-493-3p	SH3TC2	79628
hsa-miR-493-3p	CDC27	996
hsa-miR-493-3p	LIAS	11019
hsa-miR-493-3p	NFATC3	4775
hsa-miR-493-3p	FOXP2	93986
hsa-miR-493-3p	SPEG	10290
hsa-miR-493-3p	PPARA	5465
hsa-miR-493-3p	SOX21	11166
hsa-miR-493-3p	NCKAP1L	3071
hsa-miR-493-3p	SNAPIN	23557
hsa-miR-493-3p	DKK1	22943
hsa-miR-493-3p	MRPS10	55173
hsa-miR-493-3p	SRSF11	9295
hsa-miR-493-3p	MCM9	254394
hsa-miR-493-3p	EIF5AL1	143244
hsa-miR-493-3p	FRAS1	80144
hsa-miR-493-3p	PLA2R1	22925
hsa-miR-493-3p	EID1	23741
hsa-miR-493-3p	GATAD2B	57459
hsa-miR-493-3p	FAM102B	284611
hsa-miR-493-3p	TMEM167A	153339
hsa-miR-493-3p	HNMT	3176
hsa-miR-493-3p	SOSTDC1	25928
hsa-miR-493-3p	XPO4	64328
hsa-miR-493-3p	CIAO1	9391
hsa-miR-493-3p	RHOC	389
hsa-miR-493-3p	MAP2K7	5609
hsa-miR-493-3p	FZD4	8322
hsa-miR-493-3p	MXI1	4601
hsa-miR-532-5p	DDHD1	80821
hsa-miR-532-5p	KCNE1	3753
hsa-miR-532-5p	GCFC2	6936
hsa-miR-532-5p	TXNRD1	7296
hsa-miR-532-5p	CXorf48	54967
hsa-miR-532-5p	DYRK2	8445
hsa-miR-532-5p	DCX	1641
hsa-miR-532-5p	PCDH9	5101
hsa-miR-532-5p	EXOG	9941
hsa-miR-532-5p	ELK4	2005
hsa-miR-532-5p	CPEB3	22849
hsa-miR-532-5p	PAQR8	85315
hsa-miR-532-5p	NDP	4693
hsa-miR-532-5p	EXOC8	149371
hsa-miR-532-5p	CHST6	4166
hsa-miR-532-5p	DEK	7913
hsa-miR-532-5p	NMUR2	56923
hsa-miR-532-5p	MYLK4	340156
hsa-miR-532-5p	FGFR1	2260
hsa-miR-532-5p	PTPRO	5800
hsa-miR-532-5p	GABPA	2551
hsa-miR-532-5p	SCML1	6322
hsa-miR-532-5p	CCDC113	29070
hsa-miR-532-5p	MUC17	140453
hsa-miR-532-5p	SLC5A3	6526
hsa-miR-532-5p	BACH1	571
hsa-miR-532-5p	CDK6	1021
hsa-miR-532-5p	MOG	4340
hsa-miR-532-5p	MTMR3	8897
hsa-miR-532-5p	HPSE2	60495
hsa-miR-532-5p	ENAH	55740
hsa-miR-532-5p	EYA3	2140
hsa-miR-532-5p	RASSF5	83593
hsa-miR-532-5p	LPP	4026
hsa-miR-532-5p	TDGF1	6997
hsa-miR-532-5p	SUMO1	7341
hsa-miR-532-5p	STC2	8614
hsa-miR-532-5p	DDOST	1650
hsa-miR-532-5p	PFKFB2	5208
hsa-miR-532-5p	IPO8	10526
hsa-miR-532-5p	MON2	23041
hsa-miR-532-5p	SSH2	85464
hsa-miR-532-5p	ALDH1L2	160428
hsa-miR-532-5p	MDM4	4194
hsa-miR-532-5p	AVEN	57099
hsa-miR-532-5p	MS4A10	341116
hsa-miR-532-5p	AASS	10157
hsa-miR-532-5p	HOXB3	3213
hsa-miR-532-5p	MIPOL1	145282
hsa-miR-532-5p	SMARCC1	6599
hsa-miR-532-5p	C2orf43	60526
hsa-miR-532-5p	BAHCC1	57597
hsa-miR-532-5p	FGF1	2246
hsa-miR-532-5p	SESTD1	91404
hsa-miR-532-5p	PLEKHB2	55041
hsa-miR-532-5p	LAMTOR3	8649
hsa-miR-532-5p	DHX9	1660
hsa-miR-532-5p	PIK3C2G	5288
[truncated: 168 more rows]

## Sheet:  Magenta
miRNA	Target Gene	EntrezID
hsa-miR-1180-3p	MED13L	23389
hsa-miR-1180-3p	ADAMTS10	81794
hsa-miR-1180-3p	C19orf43	79002
hsa-miR-1180-3p	KANSL1	284058
hsa-miR-1180-3p	UTP15	84135
hsa-miR-1180-3p	CDH6	1004
hsa-miR-1180-3p	CPD	1362
hsa-miR-1180-3p	C9orf47	286223
hsa-miR-1180-3p	ETS1	2113
hsa-miR-1180-3p	NME2	4831
hsa-miR-1180-3p	SLC26A4	5172
hsa-miR-1180-3p	TCEAL1	9338
hsa-miR-1180-3p	TNIP2	79155
hsa-miR-155-5p	ZBTB41	360023
hsa-miR-155-5p	EYA1	2138
hsa-miR-155-5p	PCSK6	5046
hsa-miR-155-5p	KCTD3	51133
hsa-miR-155-5p	GPR126	57211
hsa-miR-155-5p	ZMYM2	7750
hsa-miR-155-5p	PHC3	80012
hsa-miR-155-5p	ZNF714	148206
hsa-miR-155-5p	ZMYM5	9205
hsa-miR-155-5p	ACYP1	97
hsa-miR-155-5p	GYG1	2992
hsa-miR-155-5p	TNFAIP8	25816
hsa-miR-155-5p	SDCBP	6386
hsa-miR-155-5p	ZNF701	55762
hsa-miR-155-5p	GPM6B	2824
hsa-miR-155-5p	TAB2	23118
hsa-miR-155-5p	SLFN11	91607
hsa-miR-155-5p	TDO2	6999
hsa-miR-155-5p	CREBRF	153222
hsa-miR-155-5p	FAM133A	286499
hsa-miR-155-5p	SLC12A6	9990
hsa-miR-155-5p	CSNK1G2	1455
hsa-miR-155-5p	SLC11A2	4891
hsa-miR-155-5p	TIPARP	25976
hsa-miR-155-5p	HCFC2	29915
hsa-miR-155-5p	SSX2IP	117178
hsa-miR-155-5p	ZBTB38	253461
hsa-miR-155-5p	MSL3	10943
hsa-miR-155-5p	LOC729020	729020
hsa-miR-155-5p	GABRA4	2557
hsa-miR-155-5p	MAPK10	5602
hsa-miR-155-5p	BTBD1	53339
hsa-miR-155-5p	KIAA1456	57604
hsa-miR-155-5p	TRIM23	373
hsa-miR-155-5p	KALRN	8997
hsa-miR-155-5p	PUS7L	83448
hsa-miR-155-5p	TCEB1	6921
hsa-miR-155-5p	TTC21B	79809
hsa-miR-155-5p	ZNF626	199777
hsa-miR-155-5p	ENTPD4	9583
hsa-miR-155-5p	LDLRAD4	753
hsa-miR-155-5p	LIG4	3981
hsa-miR-155-5p	LSM14A	26065
hsa-miR-155-5p	SMARCA4	6597
hsa-miR-155-5p	PCDHAC1	56135
hsa-miR-155-5p	NKX3-1	4824
hsa-miR-155-5p	RBMS3	27303
hsa-miR-155-5p	PCDHA3	56145
hsa-miR-155-5p	SP1	6667
hsa-miR-155-5p	FBXL17	64839
hsa-miR-155-5p	RBM47	54502
hsa-miR-155-5p	ANAPC16	119504
hsa-miR-155-5p	PICALM	8301
hsa-miR-155-5p	ATXN1L	342371
hsa-miR-155-5p	SYNRG	11276
hsa-miR-155-5p	GLUL	2752
hsa-miR-155-5p	CLUAP1	23059
hsa-miR-155-5p	RPS6KA3	6197
hsa-miR-155-5p	DET1	55070
hsa-miR-155-5p	DSG2	1829
hsa-miR-155-5p	LPAR6	10161
hsa-miR-155-5p	ZIC5	85416
hsa-miR-155-5p	TCF4	6925
hsa-miR-155-5p	ZNF618	114991
hsa-miR-155-5p	GDPD1	284161
hsa-miR-155-5p	G3BP2	9908
hsa-miR-155-5p	ENTPD1	953
hsa-miR-155-5p	CUX1	1523
hsa-miR-155-5p	PTAR1	375743
hsa-miR-155-5p	F3	2152
hsa-miR-155-5p	PAWR	5074
hsa-miR-155-5p	CCDC41	51134
hsa-miR-155-5p	ZNF236	7776
hsa-miR-155-5p	LRRTM4	80059
hsa-miR-155-5p	AICDA	57379
hsa-miR-155-5p	ZNF681	148213
hsa-miR-155-5p	VAPA	9218
hsa-miR-155-5p	GRIN2A	2903
hsa-miR-155-5p	CEP68	23177
hsa-miR-155-5p	CHURC1	91612
hsa-miR-155-5p	TERF1	7013
hsa-miR-155-5p	FAM91A1	157769
hsa-miR-155-5p	FAM149B1	317662
hsa-miR-155-5p	PCDH9	5101
hsa-miR-155-5p	UPF2	26019
hsa-miR-155-5p	STRN3	29966
hsa-miR-155-5p	FBXO33	254170
hsa-miR-155-5p	SLC15A5	729025
hsa-miR-155-5p	GALC	2581
hsa-miR-155-5p	TWF1	5756
hsa-miR-155-5p	SEMA5A	9037
hsa-miR-155-5p	NDFIP1	80762
hsa-miR-155-5p	PLD5	200150
hsa-miR-155-5p	INTS6	26512
hsa-miR-155-5p	SNX1	6642
hsa-miR-155-5p	PCDHA13	56136
hsa-miR-155-5p	NOVA1	4857
hsa-miR-155-5p	PCDHA2	56146
hsa-miR-155-5p	SP3	6670
hsa-miR-155-5p	SH3TC2	79628
hsa-miR-155-5p	WBP1L	54838
hsa-miR-155-5p	FGD4	121512
hsa-miR-155-5p	IRF2BP2	359948
hsa-miR-155-5p	PEG10	23089
hsa-miR-155-5p	RPS6KB1	6198
hsa-miR-155-5p	ETS1	2113
hsa-miR-155-5p	TLR6	10333
hsa-miR-155-5p	EPT1	85465
hsa-miR-155-5p	ANTXR2	118429
hsa-miR-155-5p	CYB561D1	284613
hsa-miR-155-5p	KBTBD11	9920
hsa-miR-155-5p	CPLX4	339302
hsa-miR-155-5p	MBNL2	10150
hsa-miR-155-5p	C6orf120	387263
hsa-miR-155-5p	FOXO3	2309
hsa-miR-155-5p	SCG2	7857
hsa-miR-155-5p	FBXO11	80204
hsa-miR-155-5p	KLHL42	57542
hsa-miR-155-5p	UPP2	151531
hsa-miR-155-5p	TRIP13	9319
hsa-miR-155-5p	ADD3	120
hsa-miR-155-5p	FBXL2	25827
hsa-miR-155-5p	LRIF1	55791
hsa-miR-155-5p	H3F3A	3020
hsa-miR-155-5p	TMEM194A	23306
hsa-miR-155-5p	LCA5	167691
hsa-miR-155-5p	PIK3CA	5290
hsa-miR-155-5p	LRRTM2	26045
hsa-miR-155-5p	UBQLN1	29979
hsa-miR-155-5p	FAM133B	257415
hsa-miR-155-5p	ZNF737	100129842
hsa-miR-155-5p	PTN	5764
hsa-miR-155-5p	XAF1	54739
hsa-miR-155-5p	ZNF492	57615
hsa-miR-155-5p	CD47	961
hsa-miR-155-5p	KIAA1715	80856
hsa-miR-155-5p	SOCS5	9655
hsa-miR-155-5p	HBP1	26959
hsa-miR-155-5p	PCDHA12	56137
hsa-miR-155-5p	PCDHA1	56147
hsa-miR-155-5p	STYX	6815
hsa-miR-155-5p	DHX40	79665
hsa-miR-155-5p	ELMOD1	55531
hsa-miR-155-5p	TDRD9	122402
hsa-miR-155-5p	PTPRQ	374462
hsa-miR-155-5p	ZNF652	22834
hsa-miR-155-5p	GNAS	2778
hsa-miR-155-5p	RREB1	6239
hsa-miR-155-5p	BSDC1	55108
hsa-miR-155-5p	EXOC5	10640
hsa-miR-155-5p	ZNF468	90333
hsa-miR-155-5p	PSTK	118672
hsa-miR-155-5p	LPGAT1	9926
hsa-miR-155-5p	TTF1	7270
hsa-miR-155-5p	AGO4	192670
hsa-miR-155-5p	ZNF260	339324
hsa-miR-155-5p	POTEC	388468
hsa-miR-155-5p	FMO5	2330
hsa-miR-155-5p	PDE3A	5139
hsa-miR-155-5p	SERPINA10	51156
hsa-miR-155-5p	SLC4A10	57282
hsa-miR-155-5p	FZD3	7976
hsa-miR-155-5p	WDFY1	57590
hsa-miR-155-5p	IGSF11	152404
hsa-miR-155-5p	QKI	9444
hsa-miR-155-5p	HAL	3034
hsa-miR-155-5p	IAPP	3375
hsa-miR-155-5p	DPY19L1	23333
hsa-miR-155-5p	ZNF845	91664
hsa-miR-155-5p	PLS1	5357
hsa-miR-155-5p	RRP15	51018
hsa-miR-155-5p	EPM2A	7957
hsa-miR-155-5p	C12orf40	283461
hsa-miR-155-5p	LECT1	11061
hsa-miR-155-5p	HSPE1-MOB4	100529241
hsa-miR-155-5p	PTPN2	5771
hsa-miR-155-5p	SCUBE2	57758
hsa-miR-155-5p	CDH6	1004
hsa-miR-155-5p	LRAT	9227
hsa-miR-155-5p	SGIP1	84251
hsa-miR-155-5p	CSRNP2	81566
hsa-miR-155-5p	C3orf58	205428
hsa-miR-155-5p	RAPGEF2	9693
hsa-miR-155-5p	CA6	765
hsa-miR-155-5p	LMX1A	4009
hsa-miR-155-5p	PCDHA11	56138
hsa-miR-155-5p	DYNC1I1	1780
hsa-miR-155-5p	NPHS1	4868
hsa-miR-155-5p	SYPL1	6856
hsa-miR-155-5p	SAP30L	79685
hsa-miR-155-5p	G2E3	55632
hsa-miR-155-5p	TYW3	127253
hsa-miR-155-5p	DYRK2	8445
hsa-miR-155-5p	LIN28B	389421
hsa-miR-155-5p	RAB11FIP2	22841
hsa-miR-155-5p	FUT9	10690
hsa-miR-155-5p	ZNF160	90338
hsa-miR-155-5p	IKBIP	121457
hsa-miR-155-5p	DMTF1	9988
hsa-miR-155-5p	ARHGAP18	93663
hsa-miR-155-5p	ARID2	196528
hsa-miR-155-5p	ZNF761	388561
hsa-miR-155-5p	GLRA3	8001
hsa-miR-155-5p	CHD9	80205
hsa-miR-155-5p	TSHZ3	57616
hsa-miR-155-5p	SLC2A12	154091
hsa-miR-155-5p	HIF1A	3091
hsa-miR-155-5p	MOB4	25843
hsa-miR-155-5p	MBNL3	55796
hsa-miR-155-5p	JARID2	3720
hsa-miR-155-5p	LRRC8B	23507
hsa-miR-155-5p	FBXO22	26263
hsa-miR-155-5p	VPS36	51028
hsa-miR-155-5p	C8orf44-SGK3	100533105
hsa-miR-155-5p	GCNT1	2650
hsa-miR-155-5p	BNC2	54796
hsa-miR-155-5p	CDX1	1044
hsa-miR-155-5p	RASAL2	9462
hsa-miR-155-5p	ZNF528	84436
hsa-miR-155-5p	FBXO30	84085
hsa-miR-155-5p	LNX2	222484
hsa-miR-155-5p	PHACTR2	9749
hsa-miR-155-5p	CCNT2	905
hsa-miR-155-5p	SMAD1	4086
hsa-miR-155-5p	ATP2C1	27032
hsa-miR-155-5p	PCDHA10	56139
hsa-miR-155-5p	FEM1C	56929
hsa-miR-155-5p	RUFY2	55680
hsa-miR-155-5p	PRSS12	8492
hsa-miR-155-5p	GDF6	392255
hsa-miR-155-5p	ZNF507	22847
hsa-miR-155-5p	FANCF	2188
hsa-miR-155-5p	MAP3K2	10746
hsa-miR-155-5p	UBXN2B	137886
hsa-miR-155-5p	CLCN3	1182
hsa-miR-155-5p	ACTR8	93973
hsa-miR-155-5p	TYRP1	7306
hsa-miR-155-5p	ZNF470	388566
hsa-miR-155-5p	GABRA1	2554
hsa-miR-155-5p	ENPP1	5167
hsa-miR-155-5p	KRCC1	51315
hsa-miR-155-5p	SSPN	8082
hsa-miR-155-5p	STARD5	80765
hsa-miR-155-5p	RBAK	57786
hsa-miR-155-5p	TMTC2	160335
hsa-miR-155-5p	APAF1	317
hsa-miR-155-5p	HIVEP2	3097
hsa-miR-155-5p	LAMP2	3920
hsa-miR-155-5p	MORC3	23515
hsa-miR-155-5p	PTPRG	5793
hsa-miR-155-5p	KLHL5	51088
hsa-miR-155-5p	PARD3B	117583
hsa-miR-155-5p	TCAIM	285343
hsa-miR-155-5p	PSIP1	11168
hsa-miR-155-5p	MBTD1	54799
hsa-miR-155-5p	RCBTB2	1102
hsa-miR-155-5p	STXBP5L	9515
hsa-miR-155-5p	MCM8	84515
hsa-miR-155-5p	FAR1	84188
hsa-miR-155-5p	ZNF396	252884
hsa-miR-155-5p	DRP2	1821
hsa-miR-155-5p	TMED5	50999
hsa-miR-155-5p	LHX9	56956
hsa-miR-155-5p	MANEA	79694
hsa-miR-155-5p	2018-09-11	55752
hsa-miR-155-5p	ACOT12	134526
hsa-miR-155-5p	PPM1D	8493
hsa-miR-155-5p	SLC25A53	401612
hsa-miR-155-5p	TBC1D30	23329
hsa-miR-155-5p	FOXE1	2304
hsa-miR-155-5p	KDM5B	10765
hsa-miR-155-5p	FAM199X	139231
hsa-miR-155-5p	UNC80	285175
hsa-miR-155-5p	CARHSP1	23589
hsa-miR-155-5p	PAXBP1	94104
hsa-miR-155-5p	USH2A	7399
hsa-miR-155-5p	TAPT1	202018
hsa-miR-155-5p	ZNF680	340252
hsa-miR-155-5p	HBS1L	10767
hsa-miR-155-5p	FAM69A	388650
hsa-miR-155-5p	ANKFY1	51479
hsa-miR-155-5p	SERINC1	57515
hsa-miR-155-5p	FXR1	8087
hsa-miR-155-5p	APOL6	80830
hsa-miR-155-5p	SPAST	6683
hsa-miR-155-5p	RAPH1	65059
hsa-miR-155-5p	ZNF320	162967
hsa-miR-155-5p	ARVCF	421
hsa-miR-155-5p	IGF2	3481
hsa-miR-155-5p	RAB3B	5865
hsa-miR-155-5p	PLEKHA1	59338
hsa-miR-155-5p	SAR1B	51128
hsa-miR-155-5p	C5orf64	285668
hsa-miR-155-5p	RBP2	5948
hsa-miR-155-5p	C15orf41	84529
hsa-miR-155-5p	RICTOR	253260
hsa-miR-155-5p	CD36	948
hsa-miR-155-5p	MEF2A	4205
hsa-miR-155-5p	PCDHA8	56140
hsa-miR-155-5p	TLE4	7091
hsa-miR-155-5p	ZFAND1	79752
hsa-miR-155-5p	PCDHA6	56142
hsa-miR-155-5p	STXBP5	134957
hsa-miR-155-5p	UNC5C	8633
hsa-miR-155-5p	FBXO48	554251
hsa-miR-155-5p	AAK1	22848
hsa-miR-155-5p	RXRA	6256
hsa-miR-155-5p	DCUN1D2	55208
hsa-miR-155-5p	AKAP10	11216
hsa-miR-155-5p	CACUL1	143384
hsa-miR-155-5p	SGK3	23678
hsa-miR-155-5p	TP53INP1	94241
hsa-miR-155-5p	WEE1	7465
hsa-miR-155-5p	ZNF860	344787
hsa-miR-155-5p	C2orf80	389073
hsa-miR-155-5p	LGSN	51557
hsa-miR-155-5p	ARHGAP20	57569
hsa-miR-155-5p	ABAT	18
hsa-miR-155-5p	USP9X	8239
hsa-miR-155-5p	ZNF611	81856
hsa-miR-155-5p	TRPM8	79054
hsa-miR-155-5p	DENND1B	163486
hsa-miR-155-5p	ATP2B3	492
hsa-miR-155-5p	NSL1	25936
hsa-miR-155-5p	RORA	6095
hsa-miR-155-5p	ZDHHC2	51201
hsa-miR-155-5p	2018-03-01	55016
hsa-miR-155-5p	CLCN5	1184
hsa-miR-155-5p	SEC14L5	9717
hsa-miR-155-5p	CCDC126	90693
hsa-miR-155-5p	LCORL	254251
hsa-miR-155-5p	PCDHA9	9752
hsa-miR-155-5p	TAF5L	27097
hsa-miR-155-5p	PCDHA7	56141
hsa-miR-155-5p	TWSG1	57045
hsa-miR-155-5p	TRPS1	7227
hsa-miR-155-5p	RAD18	56852
hsa-miR-155-5p	DDX3Y	8653
hsa-miR-155-5p	TMEM194B	100131211
hsa-miR-155-5p	BTBD3	22903
hsa-miR-155-5p	SATB1	6304
hsa-miR-155-5p	KANSL1L	151050
hsa-miR-155-5p	GPRIN3	285513
hsa-miR-155-5p	MMP16	4325
hsa-miR-155-5p	GABARAPL1	23710
hsa-miR-155-5p	CYP2U1	113612
hsa-miR-155-5p	ZNF28	7576
hsa-miR-155-5p	RTKN2	219790
hsa-miR-155-5p	GATS	352954
hsa-miR-155-5p	CCR9	10803
hsa-miR-155-5p	ZNF880	400713
hsa-miR-155-5p	HMP19	51617
hsa-miR-155-5p	FAM135A	57579
hsa-miR-155-5p	ACTA1	58
hsa-miR-155-5p	STAC	6769
hsa-miR-155-5p	CDC73	79577
hsa-miR-155-5p	ADAMTS1	9510
hsa-miR-155-5p	TMEM202	338949
hsa-miR-155-5p	GJA5	2702
hsa-miR-155-5p	CSF1R	1436
hsa-miR-155-5p	MASTL	84930
hsa-miR-155-5p	SESTD1	91404
hsa-miR-155-5p	WDR72	256764
hsa-miR-155-5p	ZSCAN12	9753
hsa-miR-155-5p	PDCD4	27250
hsa-miR-155-5p	PAK7	57144
hsa-miR-155-5p	ZNF665	79788
hsa-miR-155-5p	TM9SF3	56889
hsa-miR-155-5p	HECTD2	143279
hsa-miR-155-5p	TRIM32	22954
hsa-miR-155-5p	IL17RB	55540
hsa-miR-155-5p	GATM	2628
hsa-miR-155-5p	GCFC2	6936
hsa-miR-155-5p	MYBL1	4603
hsa-miR-155-5p	FMNL2	114793
hsa-miR-155-5p	VEZF1	7716
hsa-miR-155-5p	MPEG1	219972
hsa-miR-155-5p	OOEP	441161
hsa-miR-155-5p	TMEM66	51669
hsa-miR-155-5p	ABCD2	225
hsa-miR-155-5p	ZNF431	170959
hsa-miR-155-5p	SCAMP1	9522
hsa-miR-155-5p	BACH1	571
hsa-miR-155-5p	TNPO1	3842
hsa-miR-155-5p	PCDHA5	56143
hsa-miR-155-5p	MPP5	64398
hsa-miR-155-5p	LRP1B	53353
hsa-miR-155-5p	PLEKHB2	55041
hsa-miR-155-5p	TOMM20	9804
hsa-miR-155-5p	ZIC3	7547
hsa-miR-155-5p	PHF17	79960
hsa-miR-155-5p	ADAMTSL3	57188
hsa-miR-155-5p	ZNF98	148198
hsa-miR-155-5p	MAP3K14	9020
hsa-miR-155-5p	SCN7A	6332
hsa-miR-155-5p	TENM3	55714
hsa-miR-155-5p	KDM2A	22992
hsa-miR-155-5p	COL19A1	1310
hsa-miR-155-5p	NARS	4677
hsa-miR-155-5p	KBTBD2	25948
hsa-miR-155-5p	PALD1	27143
hsa-miR-155-5p	LYSMD3	116068
hsa-miR-155-5p	ZKSCAN8	7745
hsa-miR-155-5p	HNRNPA3	220988
hsa-miR-155-5p	DBF4	10926
hsa-miR-155-5p	ZNF704	619279
hsa-miR-155-5p	NAA38	51691
hsa-miR-155-5p	AMBN	258
hsa-miR-155-5p	ZNF721	170960
hsa-miR-155-5p	ZNF254	9534
hsa-miR-155-5p	KLHL4	56062
hsa-miR-155-5p	PCDHA4	56144
hsa-miR-155-5p	SOX11	6664
hsa-miR-155-5p	S100PBP	64766
hsa-miR-155-5p	POLE3	54107
hsa-miR-155-5p	FREM2	341640
hsa-miR-155-5p	RPE	6120
hsa-miR-155-5p	RGP1	9827
hsa-miR-155-5p	GLCCI1	113263
hsa-miR-155-5p	MEIS1	4211
hsa-miR-155-5p	MECP2	4204
hsa-miR-155-5p	SOCS1	8651
hsa-miR-155-5p	MSH6	2956
hsa-miR-155-5p	MSH2	4436
hsa-miR-155-5p	MLH1	4292
hsa-miR-155-5p	INPP5D	3635
hsa-miR-155-5p	SMAD5	4090
hsa-miR-155-5p	APC	324
hsa-miR-155-5p	PKN2	5586
hsa-miR-155-5p	PHC2	1912
hsa-miR-155-5p	PDLIM5	10611
hsa-miR-155-5p	MYO10	4651
hsa-miR-155-5p	CLDN1	9076
hsa-miR-155-5p	CEBPB	1051
hsa-miR-155-5p	BRPF3	27154
hsa-miR-155-5p	TM6SF1	53346
hsa-miR-155-5p	MATR3	9782
hsa-miR-155-5p	LDOC1	23641
hsa-miR-155-5p	RHOA	387
hsa-miR-155-5p	AGTR1	185
hsa-miR-155-5p	FGF7	2252
hsa-miR-155-5p	IKBKE	9641
hsa-miR-155-5p	SPI1	6688
hsa-miR-155-5p	EDN1	1906
hsa-miR-155-5p	MAFB	9935
hsa-miR-155-5p	RUNX2	860
hsa-miR-155-5p	IFNGR1	3459
hsa-miR-155-5p	CYR61	3491
hsa-miR-155-5p	SMAD2	4087
hsa-miR-155-5p	MYB	4602
hsa-miR-155-5p	SKI	6497
hsa-miR-155-5p	RNF123	63891
hsa-miR-155-5p	SOX6	55553
hsa-miR-155-5p	CKAP5	9793
hsa-miR-155-5p	JUN	3725
hsa-miR-155-5p	PKIA	5569
hsa-miR-155-5p	CSNK1A1	1452
hsa-miR-155-5p	GCSAM	257144
hsa-miR-155-5p	KDM3A	55818
hsa-miR-155-5p	UQCRFS1	7386
hsa-miR-155-5p	IL13RA1	3597
hsa-miR-155-5p	FADD	8772
hsa-miR-155-5p	BCL6	604
hsa-miR-155-5p	MITF	4286
hsa-miR-155-5p	MAP3K10	4294
hsa-miR-155-5p	NOS3	4846
hsa-miR-155-5p	MYLK	4638
hsa-miR-155-5p	MYD88	4615
hsa-miR-155-5p	EXOSC2	23404
hsa-miR-155-5p	CARD11	84433
hsa-miR-155-5p	C16orf62	57020
hsa-miR-155-5p	TSPAN14	81619
hsa-miR-155-5p	PRKAR1A	5573
hsa-miR-155-5p	MRPS27	23107
hsa-miR-155-5p	OLR1	4973
hsa-miR-155-5p	CD68	968
hsa-miR-155-5p	CEP41	95681
hsa-miR-155-5p	CIAPIN1	57019
hsa-miR-155-5p	TRAK1	22906
hsa-miR-155-5p	TBC1D14	57533
hsa-miR-155-5p	MRPL18	29074
hsa-miR-155-5p	ARMC2	84071
hsa-miR-155-5p	ARL15	54622
hsa-miR-155-5p	LRRC59	55379
hsa-miR-155-5p	ANXA2	302
hsa-miR-155-5p	CEP83	51134
hsa-miR-155-5p	MARF1	9665
hsa-miR-155-5p	WWC1	23286
hsa-miR-155-5p	CCND1	595
hsa-miR-155-5p	CXCL8	3576
hsa-miR-155-5p	PHF14	9678
hsa-miR-155-5p	INPP5F	22876
hsa-miR-155-5p	FAM177A1	283635
hsa-miR-155-5p	SECISBP2	79048
hsa-miR-155-5p	PAK2	5062
hsa-miR-155-5p	NFKB1	4790
hsa-miR-155-5p	VPS18	57617
hsa-miR-155-5p	NSD3	54904
hsa-miR-155-5p	E2F2	1870
hsa-miR-155-5p	C3orf18	51161
hsa-miR-155-5p	SHANK2	22941
hsa-miR-155-5p	SH3PXD2A	9644
hsa-miR-155-5p	PIK3R1	5295
hsa-miR-155-5p	VHL	7428
hsa-miR-155-5p	FOS	2353
hsa-miR-155-5p	MAPK14	1432
hsa-miR-155-5p	MYC	4609
hsa-miR-155-5p	SEL1L	6400
hsa-miR-155-5p	DOCK1	1793
hsa-miR-155-5p	RAD51	5888
hsa-miR-155-5p	THRB	7068
hsa-miR-155-5p	MXI1	4601
hsa-miR-155-5p	MAPK13	5603
hsa-miR-155-5p	SOCS6	9306
hsa-miR-155-5p	RPTOR	57521
hsa-miR-155-5p	TFAM	7019
hsa-miR-155-5p	STAT1	6772
hsa-miR-155-5p	CCND2	894
hsa-miR-155-5p	CASP3	836
hsa-miR-155-5p	TBRG1	84897
hsa-miR-155-5p	HOMEZ	57594
hsa-miR-155-5p	NR1H3	10062
hsa-miR-155-5p	PTEN	5728
hsa-miR-155-5p	FBXW7	55294
hsa-miR-155-5p	SAMHD1	25939
hsa-miR-221-3p	GLMN	11146
hsa-miR-221-3p	SCOC	60592
hsa-miR-221-3p	OSBPL3	26031
hsa-miR-221-3p	GRB10	2887
hsa-miR-221-3p	GPR137B	7107
hsa-miR-221-3p	PCDH11X	27328
hsa-miR-221-3p	FAM104B	90736
hsa-miR-221-3p	MDM2	4193
hsa-miR-221-3p	MIA3	375056
hsa-miR-221-3p	PPP6C	5537
hsa-miR-221-3p	KIAA0586	9786
hsa-miR-221-3p	ATXN1	6310
hsa-miR-221-3p	POGZ	23126
hsa-miR-221-3p	ZSCAN31	64288
hsa-miR-221-3p	DMRT3	58524
hsa-miR-221-3p	ITPR2	3709
hsa-miR-221-3p	AP3B2	8120
hsa-miR-221-3p	SYBU	55638
hsa-miR-221-3p	BEAN1	146227
hsa-miR-221-3p	AQP3	360
hsa-miR-221-3p	VGLL4	9686
hsa-miR-221-3p	CNR1	1268
hsa-miR-221-3p	BEND4	389206
hsa-miR-221-3p	EIF5	1983
hsa-miR-221-3p	ADAM17	6868
hsa-miR-221-3p	NIPBL	25836
hsa-miR-221-3p	APOLD1	81575
hsa-miR-221-3p	TRDMT1	1787
hsa-miR-221-3p	ZNF572	137209
hsa-miR-221-3p	KMT2A	4297
hsa-miR-221-3p	MAGI1	9223
hsa-miR-221-3p	COL6A5	256076
hsa-miR-221-3p	PDCD10	11235
hsa-miR-221-3p	DNM3	26052
hsa-miR-221-3p	TPD52L1	7164
hsa-miR-221-3p	TFG	10342
hsa-miR-221-3p	ST8SIA1	6489
hsa-miR-221-3p	MESDC1	59274
hsa-miR-221-3p	JAK3	3718
hsa-miR-221-3p	ARID1A	8289
hsa-miR-221-3p	CCDC50	152137
hsa-miR-221-3p	STYX	6815
hsa-miR-221-3p	BCHE	590
hsa-miR-221-3p	TOX	9760
hsa-miR-221-3p	C18orf32	497661
hsa-miR-221-3p	TAF11	6882
hsa-miR-221-3p	NBPF3	84224
hsa-miR-221-3p	TSC22D3	1831
hsa-miR-221-3p	ASB7	140460
hsa-miR-221-3p	MYBL1	4603
hsa-miR-221-3p	SLC4A7	9497
hsa-miR-221-3p	ENAH	55740
hsa-miR-221-3p	SVIP	258010
hsa-miR-221-3p	IFRD1	3475
hsa-miR-221-3p	MCTS1	28985
hsa-miR-221-3p	PKDCC	91461
hsa-miR-221-3p	C11orf87	399947
hsa-miR-221-3p	PRLR	5618
hsa-miR-221-3p	SLC22A3	6581
hsa-miR-221-3p	AZI2	64343
hsa-miR-221-3p	PANK3	79646
hsa-miR-221-3p	KCNQ3	3786
hsa-miR-221-3p	SNRNP48	154007
hsa-miR-221-3p	TLE3	7090
hsa-miR-221-3p	CACNB4	785
hsa-miR-221-3p	ZFYVE16	9765
hsa-miR-221-3p	COX15	1355
hsa-miR-221-3p	FABP2	2169
hsa-miR-221-3p	TCF12	6938
hsa-miR-221-3p	KIAA1841	84542
hsa-miR-221-3p	ERCC4	2072
hsa-miR-221-3p	NTF3	4908
hsa-miR-221-3p	ZNF615	284370
hsa-miR-221-3p	DDX42	11325
hsa-miR-221-3p	ANKIB1	54467
hsa-miR-221-3p	ARRDC4	91947
hsa-miR-221-3p	NFYB	4801
hsa-miR-221-3p	EML6	400954
hsa-miR-221-3p	SNCA	6622
hsa-miR-221-3p	NXN	64359
hsa-miR-221-3p	SCD5	79966
hsa-miR-221-3p	STMN1	3925
hsa-miR-221-3p	STK24	8428
hsa-miR-221-3p	RBM24	221662
hsa-miR-221-3p	CYLD	1540
hsa-miR-221-3p	RPL17-C18orf32	100526842
hsa-miR-221-3p	GABRA1	2554
hsa-miR-221-3p	TMEM185A	84548
hsa-miR-221-3p	C15orf26	161502
hsa-miR-221-3p	CLDN11	5010
hsa-miR-221-3p	NXT2	55916
hsa-miR-221-3p	ARHGEF38	54848
hsa-miR-221-3p	TRPC3	7222
hsa-miR-221-3p	TFB1M	51106
hsa-miR-221-3p	KCNG4	93107
hsa-miR-221-3p	AADAC	13
hsa-miR-221-3p	RAB1A	5861
hsa-miR-221-3p	SEC24B	10427
hsa-miR-221-3p	NAA25	80018
hsa-miR-221-3p	SNX4	8723
hsa-miR-221-3p	TUB	7275
hsa-miR-221-3p	ADAMTS6	11174
hsa-miR-221-3p	LRRTM2	26045
hsa-miR-221-3p	GNAI3	2773
hsa-miR-221-3p	MIER3	166968
hsa-miR-221-3p	ZNF652	22834
hsa-miR-221-3p	CASZ1	54897
hsa-miR-221-3p	TAF9B	51616
hsa-miR-221-3p	ARAP2	116984
hsa-miR-221-3p	PAFAH1B2	5049
hsa-miR-221-3p	ACADM	34
hsa-miR-221-3p	RIT2	6014
hsa-miR-221-3p	TMSB15B	286527
hsa-miR-221-3p	DCUN1D4	23142
hsa-miR-221-3p	IQCH	64799
hsa-miR-221-3p	ALDH1A1	216
hsa-miR-221-3p	PDGFD	80310
hsa-miR-221-3p	TNFSF10	8743
hsa-miR-221-3p	YWHAG	7532
hsa-miR-221-3p	MS4A1	931
hsa-miR-221-3p	TMEM209	84928
hsa-miR-221-3p	GPD2	2820
hsa-miR-221-3p	KHDRBS2	202559
hsa-miR-221-3p	SERPINB2	5055
hsa-miR-221-3p	RAB18	22931
hsa-miR-221-3p	PIEZO2	63895
hsa-miR-221-3p	GOLPH3L	55204
hsa-miR-221-3p	IL1RAP	3556
hsa-miR-221-3p	NLK	51701
hsa-miR-221-3p	ANTXR2	118429
hsa-miR-221-3p	PHF2	5253
hsa-miR-221-3p	APAF1	317
hsa-miR-221-3p	RORB	6096
hsa-miR-221-3p	SEMA3C	10512
hsa-miR-221-3p	TBC1D26	353149
hsa-miR-221-3p	LRRC19	64922
hsa-miR-221-3p	ZFP36L2	678
hsa-miR-221-3p	PCDH11Y	83259
hsa-miR-221-3p	LBR	3930
hsa-miR-221-3p	SNAP23	8773
hsa-miR-221-3p	FAM185A	222234
hsa-miR-221-3p	SCARB2	950
hsa-miR-221-3p	PAK7	57144
hsa-miR-221-3p	CHORDC1	26973
hsa-miR-221-3p	LRRCC1	85444
hsa-miR-221-3p	CYR61	3491
hsa-miR-221-3p	NRK	203447
hsa-miR-221-3p	SRSF10	10772
hsa-miR-221-3p	SPG20	23111
hsa-miR-221-3p	ZNF91	7644
hsa-miR-221-3p	NSMCE4A	54780
hsa-miR-221-3p	SAMD8	142891
hsa-miR-221-3p	PIK3R1	5295
hsa-miR-221-3p	RPL13	6137
hsa-miR-221-3p	ZBTB41	360023
hsa-miR-221-3p	DBT	1629
hsa-miR-221-3p	SOD2	6648
hsa-miR-221-3p	DDHD2	23259
hsa-miR-221-3p	PCMTD1	115294
hsa-miR-221-3p	SMARCA5	8467
hsa-miR-221-3p	CDK19	23097
hsa-miR-221-3p	THBS2	7058
hsa-miR-221-3p	RSBN1L	222194
hsa-miR-221-3p	EIF5A2	56648
hsa-miR-221-3p	INSIG1	3638
hsa-miR-221-3p	ZKSCAN8	7745
hsa-miR-221-3p	PPP3R1	5534
hsa-miR-221-3p	KRT77	374454
hsa-miR-221-3p	SPTBN1	6711
hsa-miR-221-3p	ITIH5	80760
hsa-miR-221-3p	MED12L	116931
hsa-miR-221-3p	LPP	4026
hsa-miR-221-3p	INPP4B	8821
hsa-miR-221-3p	SLC17A8	246213
hsa-miR-221-3p	ZFPM2	23414
hsa-miR-221-3p	KDR	3791
hsa-miR-221-3p	RALGAPA1	253959
hsa-miR-221-3p	ZNF275	10838
hsa-miR-221-3p	PCDH10	57575
hsa-miR-221-3p	PRDM2	7799
hsa-miR-221-3p	HECTD2	143279
hsa-miR-221-3p	C6orf120	387263
hsa-miR-221-3p	STAC	6769
hsa-miR-221-3p	FAM208A	23272
hsa-miR-221-3p	CYP1B1	1545
hsa-miR-221-3p	IRGQ	126298
hsa-miR-221-3p	MTMR6	9107
hsa-miR-221-3p	MBD2	8932
hsa-miR-221-3p	KIAA1549L	25758
hsa-miR-221-3p	MAT2A	4144
hsa-miR-221-3p	NAP1L5	266812
hsa-miR-221-3p	CREBZF	58487
hsa-miR-221-3p	NSUN4	387338
hsa-miR-221-3p	EFNB2	1948
hsa-miR-221-3p	BRD1	23774
hsa-miR-221-3p	CYP7A1	1581
hsa-miR-221-3p	CLVS2	134829
hsa-miR-221-3p	VAPB	9217
hsa-miR-221-3p	CDKN1B	1027
hsa-miR-221-3p	BCL2L11	10018
hsa-miR-221-3p	BMF	90427
hsa-miR-221-3p	FOXO3	2309
hsa-miR-221-3p	KIT	3815
hsa-miR-221-3p	HOXB5	3215
hsa-miR-221-3p	CDKN1C	1028
hsa-miR-221-3p	TMED7	51014
hsa-miR-221-3p	DDIT4	54541
hsa-miR-221-3p	BNIP3L	665
hsa-miR-221-3p	TBK1	29110
hsa-miR-221-3p	DKK2	27123
hsa-miR-221-3p	BBC3	27113
hsa-miR-221-3p	TIMP3	7078
hsa-miR-221-3p	ICAM1	3383
hsa-miR-221-3p	FOS	2353
hsa-miR-221-3p	BNIP3	664
hsa-miR-221-3p	NAIP	4671
hsa-miR-221-3p	ESR1	2099
hsa-miR-221-3p	TICAM1	148022
hsa-miR-221-3p	PTEN	5728
hsa-miR-221-3p	CORO1A	11151
hsa-miR-221-3p	TCEAL1	9338
hsa-miR-221-3p	DIRAS3	9077
hsa-miR-221-3p	ETS1	2113
hsa-miR-221-3p	DICER1	23405
hsa-miR-221-3p	TRPS1	7227
hsa-miR-221-3p	CERS2	29956
hsa-miR-221-3p	FMR1	2332
hsa-miR-221-3p	DVL2	1856
hsa-miR-221-3p	WEE1	7465
hsa-miR-221-3p	MEOX2	4223
hsa-miR-221-3p	ZEB2	9839
hsa-miR-221-3p	GJA1	2697
hsa-miR-221-3p	SSX2IP	117178
hsa-miR-221-3p	ASZ1	136991
hsa-miR-221-3p	RB1	5925
hsa-miR-221-3p	ANXA1	301
hsa-miR-221-3p	CTCF	10664
hsa-miR-221-3p	RECK	8434
hsa-miR-221-3p	PAK1	5058
hsa-miR-221-3p	RUNX1	861
hsa-miR-221-3p	ARNT	405
hsa-miR-221-3p	MMP2	4313
hsa-miR-221-3p	ADAM1A	8759
hsa-miR-221-3p	STAT5A	6776
hsa-miR-221-3p	MGMT	4255
hsa-miR-221-3p	SOCS3	9021
hsa-miR-221-3p	SOCS1	8651
hsa-miR-221-3p	RAD51	5888
hsa-miR-221-3p	ARF4	378
hsa-miR-221-3p	CXCL12	6387
hsa-miR-221-3p	BECN1	8678
hsa-miR-320a	COPS2	9318
hsa-miR-320a	FAM63B	54629
hsa-miR-320a	TMEM255A	55026
hsa-miR-320a	BLOC1S5	63915
hsa-miR-320a	PPM1B	5495
hsa-miR-320a	TUSC3	7991
hsa-miR-320a	NUS1	116150
hsa-miR-320a	ASPH	444
hsa-miR-320a	BCAT1	586
hsa-miR-320a	PTEN	5728
hsa-miR-320a	PDIK1L	149420
hsa-miR-320a	BVES	11149
hsa-miR-320a	SH3GLB1	51100
hsa-miR-320a	ESRRG	2104
hsa-miR-320a	MLF1	4291
hsa-miR-320a	VSIG4	11326
hsa-miR-320a	PAPD5	64282
hsa-miR-320a	PCDHA6	56142
hsa-miR-320a	KATNAL1	84056
hsa-miR-320a	SSR1	6745
hsa-miR-320a	ZRANB2	9406
hsa-miR-320a	FAM126B	285172
hsa-miR-320a	CPD	1362
hsa-miR-320a	GFPT1	2673
hsa-miR-320a	TANC1	85461
hsa-miR-320a	SGPL1	8879
hsa-miR-320a	MTX3	345778
hsa-miR-320a	MTSS1	9788
hsa-miR-320a	ANGEL1	23357
hsa-miR-320a	DAG1	1605
hsa-miR-320a	GUCY1A3	2982
hsa-miR-320a	ZNF705D	728957
hsa-miR-320a	BCL2L11	10018
hsa-miR-320a	RBFOX2	23543
hsa-miR-320a	DIO2	1734
hsa-miR-320a	IL5RA	3568
hsa-miR-320a	TOX	9760
hsa-miR-320a	C5orf22	55322
hsa-miR-320a	YOD1	55432
hsa-miR-320a	DCAF10	79269
hsa-miR-320a	RAP1A	5906
hsa-miR-320a	MAP7	9053
hsa-miR-320a	C18orf25	147339
hsa-miR-320a	SCN3A	6328
hsa-miR-320a	GIMAP1	170575
hsa-miR-320a	WAC	51322
hsa-miR-320a	ETV1	2115
hsa-miR-320a	MTRR	4552
hsa-miR-320a	KIF26A	26153
hsa-miR-320a	SH3TC2	79628
hsa-miR-320a	C12orf5	57103
hsa-miR-320a	TFPI	7035
hsa-miR-320a	PAIP2B	400961
hsa-miR-320a	LIFR	3977
hsa-miR-320a	MSI2	124540
hsa-miR-320a	PCSK2	5126
hsa-miR-320a	TSC1	7248
hsa-miR-320a	ST6GAL2	84620
hsa-miR-320a	NAT1	9
hsa-miR-320a	MN1	4330
hsa-miR-320a	TMEM139	135932
hsa-miR-320a	PDLIM5	10611
hsa-miR-320a	MRPL22	29093
hsa-miR-320a	GNA13	10672
hsa-miR-320a	NLN	57486
hsa-miR-320a	NXT2	55916
hsa-miR-320a	FBXO11	80204
hsa-miR-320a	STIL	6491
hsa-miR-320a	LRRFIP1	9208
hsa-miR-320a	ZNF449	203523
hsa-miR-320a	CACNB4	785
hsa-miR-320a	EIF2B1	1967
hsa-miR-320a	VHL	7428
hsa-miR-320a	MCOLN2	255231
hsa-miR-320a	LIMCH1	22998
hsa-miR-320a	LZTFL1	54585
hsa-miR-320a	GABRA5	2558
hsa-miR-320a	NPAS2	4862
hsa-miR-320a	MRPL35	51318
hsa-miR-320a	DDHD1	80821
hsa-miR-320a	APTX	54840
hsa-miR-320a	MIER1	57708
hsa-miR-320a	2018-09-15	9403
hsa-miR-320a	TMEM106B	54664
hsa-miR-320a	C17orf80	55028
hsa-miR-320a	SMARCA5	8467
hsa-miR-320a	FAM129A	116496
hsa-miR-320a	BMI1	648
hsa-miR-320a	PTGFRN	5738
hsa-miR-320a	SLC16A14	151473
hsa-miR-320a	IRAK3	11213
hsa-miR-320a	ZNF652	22834
hsa-miR-320a	EBF2	64641
hsa-miR-320a	PCDHA5	56143
hsa-miR-320a	SLC10A7	84068
hsa-miR-320a	STAT4	6775
hsa-miR-320a	PMPCB	9512
hsa-miR-320a	TCAIM	285343
hsa-miR-320a	CUX1	1523
hsa-miR-320a	GOLGA1	2800
hsa-miR-320a	ZC3H12C	85463
hsa-miR-320a	RHOBTB1	9886
hsa-miR-320a	PSD3	23362
hsa-miR-320a	HIVEP2	3097
hsa-miR-320a	CAPRIN1	4076
hsa-miR-320a	CANT1	124583
hsa-miR-320a	LOC100132146	100132146
hsa-miR-320a	GNE	10020
hsa-miR-320a	ARHGEF26	26084
hsa-miR-320a	KIAA0247	9766
hsa-miR-320a	RUFY2	55680
hsa-miR-320a	ENOSF1	55556
hsa-miR-320a	TMEM231	79583
hsa-miR-320a	RASA1	5921
hsa-miR-320a	RC3H1	149041
hsa-miR-320a	CRKL	1399
hsa-miR-320a	SLC5A3	6526
hsa-miR-320a	ADAMTS15	170689
hsa-miR-320a	ZNF107	51427
hsa-miR-320a	FGB	2244
hsa-miR-320a	AP3M1	26985
hsa-miR-320a	VEPH1	79674
hsa-miR-320a	CNOT6	57472
hsa-miR-320a	TGM2	7052
hsa-miR-320a	SNX30	401548
hsa-miR-320a	MASTL	84930
hsa-miR-320a	PAX6	5080
hsa-miR-320a	TGOLN2	10618
hsa-miR-320a	CNOT7	29883
hsa-miR-320a	LPL	4023
hsa-miR-320a	MAP3K2	10746
hsa-miR-320a	PCDH19	57526
hsa-miR-320a	XPR1	9213
hsa-miR-320a	REEP3	221035
hsa-miR-320a	EIF4E	1977
hsa-miR-320a	VLDLR	7436
hsa-miR-320a	MFSD8	256471
hsa-miR-320a	GCNT2	2651
hsa-miR-320a	ROR2	4920
hsa-miR-320a	DUSP16	80824
hsa-miR-320a	LPPR1	54886
hsa-miR-320a	HLCS	3141
hsa-miR-320a	MRPS25	64432
hsa-miR-320a	CGGBP1	8545
hsa-miR-320a	TSHZ2	128553
hsa-miR-320a	KLF5	688
hsa-miR-320a	TWF1	5756
hsa-miR-320a	TTC14	151613
hsa-miR-320a	SYNRG	11276
hsa-miR-320a	DCTN4	51164
hsa-miR-320a	ATG14	22863
hsa-miR-320a	NUCKS1	64710
hsa-miR-320a	PCDHA3	56145
hsa-miR-320a	DOT1L	84444
hsa-miR-320a	BAG5	9529
hsa-miR-320a	PPIL6	285755
hsa-miR-320a	GRIN2A	2903
hsa-miR-320a	HN1L	90861
hsa-miR-320a	MTMR7	9108
hsa-miR-320a	MAST4	375449
hsa-miR-320a	SMG7	9887
hsa-miR-320a	SIRT5	23408
hsa-miR-320a	MXD1	4084
hsa-miR-320a	ZNF605	100289635
hsa-miR-320a	DLX1	1745
hsa-miR-320a	IL6ST	3572
hsa-miR-320a	MRPL19	9801
hsa-miR-320a	ENAH	55740
hsa-miR-320a	PPP1R9A	55607
hsa-miR-320a	RCN2	5955
hsa-miR-320a	FAM117B	150864
hsa-miR-320a	TNFRSF17	608
hsa-miR-320a	CX3CR1	1524
hsa-miR-320a	SLC9A2	6549
hsa-miR-320a	ZSCAN25	221785
hsa-miR-320a	CBX3	11335
hsa-miR-320a	PPP1R12B	4660
hsa-miR-320a	TBL1XR1	79718
hsa-miR-320a	RNF150	57484
hsa-miR-320a	TPD52L2	7165
hsa-miR-320a	RBMXL1	494115
hsa-miR-320a	PDK1	5163
hsa-miR-320a	ABHD13	84945
hsa-miR-320a	ADH5	128
hsa-miR-320a	PBX3	5090
hsa-miR-320a	ZBTB21	49854
hsa-miR-320a	CLPX	10845
hsa-miR-320a	MIB1	57534
hsa-miR-320a	PCDHAC2	56134
hsa-miR-320a	LRRC27	80313
hsa-miR-320a	SLCO1A2	6579
hsa-miR-320a	CCPG1	9236
hsa-miR-320a	SDK1	221935
hsa-miR-320a	CANX	821
hsa-miR-320a	EREG	2069
hsa-miR-320a	XBP1	7494
hsa-miR-320a	BOD1L1	259282
hsa-miR-320a	OGN	4969
hsa-miR-320a	TRIAP1	51499
hsa-miR-320a	ZFP91	80829
hsa-miR-320a	INO80D	54891
hsa-miR-320a	GPR107	57720
hsa-miR-320a	ONECUT2	9480
hsa-miR-320a	ATP5SL	55101
hsa-miR-320a	WNK1	65125
hsa-miR-320a	EMB	133418
hsa-miR-320a	RAB2A	5862
hsa-miR-320a	CCDC50	152137
hsa-miR-320a	CNKSR2	22866
hsa-miR-320a	C16orf58	64755
hsa-miR-320a	PCDHA2	56146
hsa-miR-320a	LCOR	84458
hsa-miR-320a	TCEB1	6921
hsa-miR-320a	YIPF6	286451
hsa-miR-320a	GSPT1	2935
hsa-miR-320a	CCDC149	91050
hsa-miR-320a	INA	9118
hsa-miR-320a	BEND4	389206
hsa-miR-320a	SMAD9	4093
hsa-miR-320a	DTNA	1837
hsa-miR-320a	TDP1	55775
hsa-miR-320a	RHD	6007
hsa-miR-320a	PRDM1	639
hsa-miR-320a	KIAA1324L	222223
hsa-miR-320a	RNF138	51444
hsa-miR-320a	FOXM1	2305
hsa-miR-320a	CD274	29126
hsa-miR-320a	SHCBP1	79801
hsa-miR-320a	RIMKLB	57494
hsa-miR-320a	TPM1	7168
hsa-miR-320a	CCDC152	100129792
hsa-miR-320a	PEX12	5193
hsa-miR-320a	VIM	7431
hsa-miR-320a	PRPF38A	84950
hsa-miR-320a	AK4	205
hsa-miR-320a	FAM69B	138311
hsa-miR-320a	PDE10A	10846
hsa-miR-320a	FAM160B1	57700
hsa-miR-320a	PCDHAC1	56135
hsa-miR-320a	SMARCD2	6603
hsa-miR-320a	GCM2	9247
hsa-miR-320a	CADM2	253559
hsa-miR-320a	RUNX2	860
hsa-miR-320a	XPO1	7514
hsa-miR-320a	PRTG	283659
hsa-miR-320a	PDXDC1	23042
hsa-miR-320a	IL17RD	54756
hsa-miR-320a	LARS	51520
hsa-miR-320a	JHDM1D	80853
hsa-miR-320a	BANP	54971
hsa-miR-320a	HOXA10	3206
hsa-miR-320a	ALKBH5	54890
hsa-miR-320a	PTPN14	5784
hsa-miR-320a	TNKS	8658
hsa-miR-320a	PPARGC1B	133522
hsa-miR-320a	RAC1	5879
hsa-miR-320a	CEP120	153241
hsa-miR-320a	TRAPPC8	22878
hsa-miR-320a	CREB3L2	64764
hsa-miR-320a	PCDHA1	56147
hsa-miR-320a	ENTPD4	9583
hsa-miR-320a	C1orf95	375057
hsa-miR-320a	MOB1B	92597
hsa-miR-320a	EXO1	9156
hsa-miR-320a	MAT2A	4144
hsa-miR-320a	AFF4	27125
hsa-miR-320a	IL12B	3593
hsa-miR-320a	ACOT13	55856
hsa-miR-320a	KLHL36	79786
hsa-miR-320a	DBN1	1627
hsa-miR-320a	HLTF	6596
hsa-miR-320a	USP25	29761
hsa-miR-320a	BAALC	79870
hsa-miR-320a	TPM3	7170
hsa-miR-320a	RBM25	58517
hsa-miR-320a	PHF1	5252
hsa-miR-320a	ANKRD13A	88455
hsa-miR-320a	HDX	139324
hsa-miR-320a	RAD51AP1	10635
hsa-miR-320a	TOMM34	10953
hsa-miR-320a	PCDHA13	56136
hsa-miR-320a	SNTB1	6641
hsa-miR-320a	AIMP1	9255
hsa-miR-320a	MSRB3	253827
hsa-miR-320a	CBLN1	869
hsa-miR-320a	ETFA	2108
hsa-miR-320a	YWHAH	7533
hsa-miR-320a	DPH3	285381
hsa-miR-320a	2018-09-06	23157
hsa-miR-320a	GLI3	2737
hsa-miR-320a	PPHLN1	51535
hsa-miR-320a	AGFG1	3267
hsa-miR-320a	NRP1	8829
hsa-miR-320a	FAM199X	139231
hsa-miR-320a	RAD21	5885
hsa-miR-320a	NIN	51199
hsa-miR-320a	MLLT3	4300
hsa-miR-320a	KIN	22944
hsa-miR-320a	CEP85	64793
hsa-miR-320a	DCTN5	84516
hsa-miR-320a	CREB5	9586
hsa-miR-320a	FAM89A	375061
hsa-miR-320a	HOXA5	3202
hsa-miR-320a	PCSK7	9159
hsa-miR-320a	PRAMEF18	391003
hsa-miR-320a	HEY1	23462
hsa-miR-320a	MCL1	4170
hsa-miR-320a	RBM45	129831
hsa-miR-320a	ACTR2	10097
hsa-miR-320a	DISC1	27185
hsa-miR-320a	IRF6	3664
hsa-miR-320a	ATP9A	10079
hsa-miR-320a	RPGR	6103
hsa-miR-320a	FAM84B	157638
hsa-miR-320a	BNC1	646
hsa-miR-320a	DHX15	1665
hsa-miR-320a	TROVE2	6738
hsa-miR-320a	RAB11FIP2	22841
hsa-miR-320a	TMOD3	29766
hsa-miR-320a	DHDDS	79947
hsa-miR-320a	KIAA1715	80856
hsa-miR-320a	PROK2	60675
hsa-miR-320a	PLEK	5341
hsa-miR-320a	AR	367
hsa-miR-320a	PLS1	5357
hsa-miR-320a	MYEF2	50804
hsa-miR-320a	MBL2	4153
hsa-miR-320a	METAP2	10988
hsa-miR-320a	PCDHA12	56137
hsa-miR-320a	SRP19	6728
hsa-miR-320a	BRWD3	254065
hsa-miR-320a	CD47	961
hsa-miR-320a	ULK1	8408
hsa-miR-320a	ATP11A	23250
hsa-miR-320a	GLUD1	2746
hsa-miR-320a	KLF13	51621
hsa-miR-320a	RAB27A	5873
hsa-miR-320a	ATP6V1A	523
hsa-miR-320a	MCMDC2	157777
hsa-miR-320a	GOLM1	51280
hsa-miR-320a	NR3C2	4306
hsa-miR-320a	NABP1	64859
hsa-miR-320a	C21orf62	56245
hsa-miR-320a	IDE	3416
hsa-miR-320a	SYTL4	94121
hsa-miR-320a	METTL10	399818
hsa-miR-320a	SV2B	9899
hsa-miR-320a	KITLG	4254
hsa-miR-320a	BBS5	129880
hsa-miR-320a	ITGA4	3676
hsa-miR-320a	PLXNC1	10154
hsa-miR-320a	SEC22C	9117
hsa-miR-320a	TOR1AIP2	163590
hsa-miR-320a	BMP6	654
hsa-miR-320a	TAF5	6877
hsa-miR-320a	NAP1L1	4673
hsa-miR-320a	TFCP2L1	29842
hsa-miR-320a	WLS	79971
hsa-miR-320a	KIAA1324	57535
hsa-miR-320a	THAP2	83591
hsa-miR-320a	SMAP1	60682
hsa-miR-320a	ZSCAN26	7741
hsa-miR-320a	MTDH	92140
hsa-miR-320a	ARF1	375
hsa-miR-320a	PNN	5411
hsa-miR-320a	SREK1	140890
hsa-miR-320a	ARPP19	10776
hsa-miR-320a	HP1BP3	50809
hsa-miR-320a	WDR19	57728
hsa-miR-320a	PCDHA11	56138
hsa-miR-320a	CYTH1	9267
hsa-miR-320a	FBXO33	254170
hsa-miR-320a	CDK6	1021
hsa-miR-320a	FUS	2521
hsa-miR-320a	GNAI3	2773
hsa-miR-320a	MST4	51765
hsa-miR-320a	CYTIP	9595
hsa-miR-320a	ATG2B	55102
hsa-miR-320a	TMEM108	66000
hsa-miR-320a	SEMA5A	9037
hsa-miR-320a	ATRX	546
hsa-miR-320a	CDH2	1000
hsa-miR-320a	LDHAL6A	160287
hsa-miR-320a	ALDH6A1	4329
hsa-miR-320a	TRPM8	79054
hsa-miR-320a	LHFPL3	375612
hsa-miR-320a	IGF1R	3480
hsa-miR-320a	C6orf201	404220
hsa-miR-320a	TMEM47	83604
hsa-miR-320a	MKLN1	4289
hsa-miR-320a	SYNCRIP	10492
hsa-miR-320a	EIF2D	1939
hsa-miR-320a	LAMC1	3915
hsa-miR-320a	RNF20	56254
hsa-miR-320a	PRPF40A	55660
hsa-miR-320a	MIER3	166968
hsa-miR-320a	BMPR1A	657
hsa-miR-320a	SLC26A2	1836
hsa-miR-320a	RAB18	22931
hsa-miR-320a	NAA38	51691
hsa-miR-320a	2018-09-02	4735
hsa-miR-320a	HUNK	30811
hsa-miR-320a	DNAJB14	79982
hsa-miR-320a	FNIP2	57600
hsa-miR-320a	PBX1	5087
hsa-miR-320a	DNER	92737
hsa-miR-320a	SUB1	10923
hsa-miR-320a	GOLT1B	51026
hsa-miR-320a	CREBZF	58487
hsa-miR-320a	PCDHA10	56139
hsa-miR-320a	APOL6	80830
hsa-miR-320a	C8orf46	254778
hsa-miR-320a	CHEK1	1111
hsa-miR-320a	KDSR	2531
hsa-miR-320a	CDS2	8760
hsa-miR-320a	CAMSAP2	23271
hsa-miR-320a	CHIC1	53344
hsa-miR-320a	HELZ	9931
hsa-miR-320a	N4BP1	9683
hsa-miR-320a	SMU1	55234
hsa-miR-320a	HECTD2	143279
hsa-miR-320a	RASGRF2	5924
hsa-miR-320a	GCNT4	51301
hsa-miR-320a	MRE11A	4361
hsa-miR-320a	MORC3	23515
hsa-miR-320a	ZNF343	79175
hsa-miR-320a	WTAP	9589
hsa-miR-320a	YPEL2	388403
hsa-miR-320a	JAM3	83700
hsa-miR-320a	EIF4B	1975
hsa-miR-320a	LAMP2	3920
hsa-miR-320a	IPO7	10527
hsa-miR-320a	C5orf15	56951
hsa-miR-320a	SDHA	6389
hsa-miR-320a	QSOX2	169714
hsa-miR-320a	BNIP3	664
hsa-miR-320a	PHC1	1911
hsa-miR-320a	TDG	6996
hsa-miR-320a	MYH15	22989
hsa-miR-320a	DESI2	51029
hsa-miR-320a	WWC2	80014
hsa-miR-320a	ZFP14	57677
hsa-miR-320a	TPR	7175
hsa-miR-320a	RIPPLY3	53820
hsa-miR-320a	MED1	5469
hsa-miR-320a	MAPK1IP1L	93487
hsa-miR-320a	ARL3	403
hsa-miR-320a	PRKCB	5579
hsa-miR-320a	SERINC3	10955
hsa-miR-320a	SEPSECS	51091
hsa-miR-320a	SEC63	11231
hsa-miR-320a	B4GALT6	9331
hsa-miR-320a	NAP1L5	266812
hsa-miR-320a	GABRG1	2565
hsa-miR-320a	RIOK3	8780
hsa-miR-320a	TRIM59	286827
hsa-miR-320a	SASH1	23328
hsa-miR-320a	AKT3	10000
hsa-miR-320a	UTP14C	9724
hsa-miR-320a	TMEM39A	55254
hsa-miR-320a	SLC25A36	55186
hsa-miR-320a	DDX54	79039
hsa-miR-320a	C15orf61	145853
hsa-miR-320a	RBMS2	5939
hsa-miR-320a	ADAL	161823
hsa-miR-320a	DDX42	11325
hsa-miR-320a	ZDHHC3	51304
hsa-miR-320a	SLC7A11	23657
hsa-miR-320a	BHLHE41	79365
hsa-miR-320a	GPCPD1	56261
hsa-miR-320a	RGS9BP	388531
hsa-miR-320a	CEP41	95681
hsa-miR-320a	ZNF704	619279
hsa-miR-320a	PCGF5	84333
hsa-miR-320a	JMY	133746
hsa-miR-320a	MRPS18B	28973
hsa-miR-320a	LEPR	3953
hsa-miR-320a	PCNP	57092
hsa-miR-320a	ST3GAL1	6482
hsa-miR-320a	ZMYM5	9205
hsa-miR-320a	SPTSSA	171546
hsa-miR-320a	MPPED2	744
hsa-miR-320a	TPH1	7166
hsa-miR-320a	NAA15	80155
hsa-miR-320a	NR2C2	7182
hsa-miR-320a	POLE3	54107
hsa-miR-320a	PPM1A	5494
hsa-miR-320a	ZNF223	7766
hsa-miR-320a	TMEM123	114908
hsa-miR-320a	ATP6V1C1	528
hsa-miR-320a	MAPK1	5594
hsa-miR-320a	XPNPEP3	63929
hsa-miR-320a	PCDHA7	56141
hsa-miR-320a	ANKRD52	283373
hsa-miR-320a	COX11	1353
hsa-miR-320a	ZBTB8OS	339487
hsa-miR-320a	VPS39	23339
hsa-miR-320a	GNPDA1	10007
hsa-miR-320a	LAPTM4A	9741
hsa-miR-320a	TMEM144	55314
hsa-miR-320a	CMTM4	146223
hsa-miR-320a	CCR7	1236
hsa-miR-320a	RIT1	6016
hsa-miR-320a	MT2A	4502
hsa-miR-320a	METTL7A	25840
hsa-miR-320a	SPPL2B	56928
hsa-miR-320a	ZNF470	388566
hsa-miR-320a	KAL1	3730
hsa-miR-320a	MTFMT	123263
hsa-miR-320a	PRAMEF19	645414
hsa-miR-320a	MMP16	4325
hsa-miR-320a	ZBTB44	29068
hsa-miR-320a	IGF2BP3	10643
hsa-miR-320a	CYP20A1	57404
hsa-miR-320a	PHC3	80012
hsa-miR-320a	ZNF367	195828
hsa-miR-320a	MEGF9	1955
hsa-miR-320a	TRPC5	7224
hsa-miR-320a	SFTA3	253970
hsa-miR-320a	BRWD1	54014
hsa-miR-320a	KLHL15	80311
hsa-miR-320a	POLR3D	661
hsa-miR-320a	TFRC	7037
hsa-miR-320a	HSPB6	126393
hsa-miR-320a	AQP1	358
hsa-miR-320a	AQP4	361
hsa-miR-320a	NPR1	4881
hsa-miR-320a	VDAC1	7416
hsa-miR-320a	MYC	4609
hsa-miR-320a	ITGB3	3690
hsa-miR-320a	GNAI1	2770
hsa-miR-320a	PDCD4	27250
hsa-miR-320a	NFATC3	4775
hsa-miR-320a	RAB14	51552
hsa-miR-320a	SUZ12	23512
hsa-miR-320a	YWHAZ	7534
hsa-miR-320a	VEGFA	7422
hsa-miR-320a	USP14	9097
hsa-miR-320a	ABCG2	9429
hsa-miR-320a	CTNNB1	1499
hsa-miR-320a	PICSAR	378825
hsa-miR-320a	RAB11A	8766
hsa-miR-320a	NOD2	64127
hsa-miR-320a	FH	2271
hsa-miR-320a	HMGB1	3146
hsa-miR-320a	FAS	355
hsa-miR-320b	PAX6	5080
hsa-miR-320b	RHOBTB1	9886
hsa-miR-320b	MYEF2	50804
hsa-miR-320b	PPP1R9A	55607
hsa-miR-320b	MCL1	4170
hsa-miR-320b	SCN3A	6328
hsa-miR-320b	MIB1	57534
hsa-miR-320b	FAM84B	157638
hsa-miR-320b	CRKL	1399
hsa-miR-320b	DDHD1	80821
hsa-miR-320b	CADM2	253559
hsa-miR-320b	AIMP1	9255
hsa-miR-320b	CNKSR2	22866
hsa-miR-320b	CDK6	1021
hsa-miR-320b	FOXM1	2305
hsa-miR-320b	XBP1	7494
hsa-miR-320b	PRTG	283659
hsa-miR-320b	CD274	29126
hsa-miR-320b	ATP11A	23250
hsa-miR-320b	APTX	54840
hsa-miR-320b	GNAI3	2773
hsa-miR-320b	PBX1	5087
hsa-miR-320b	TRIAP1	51499
hsa-miR-320b	ZFP91	80829
hsa-miR-320b	PROK2	60675
hsa-miR-320b	RBM45	129831
hsa-miR-320b	ACTR2	10097
hsa-miR-320b	ARF1	375
hsa-miR-320b	EIF2D	1939
hsa-miR-320b	WNK1	65125
hsa-miR-320b	HDX	139324
hsa-miR-320b	NRP1	8829
hsa-miR-320b	ARPP19	10776
hsa-miR-320b	ATRX	546
hsa-miR-320b	ESRRG	2104
hsa-miR-320b	TWF1	5756
hsa-miR-320b	PDE10A	10846
hsa-miR-320b	GOLM1	51280
hsa-miR-320b	PCDHA11	56138
hsa-miR-320b	ALDH6A1	4329
hsa-miR-320b	SRP19	6728
hsa-miR-320b	C16orf58	64755
hsa-miR-320b	FBXO33	254170
hsa-miR-320b	EREG	2069
hsa-miR-320b	DCTN5	84516
hsa-miR-320b	CREB5	9586
hsa-miR-320b	DAG1	1605
hsa-miR-320b	INA	9118
hsa-miR-320b	BEND4	389206
hsa-miR-320b	RBFOX2	23543
hsa-miR-320b	BANP	54971
hsa-miR-320b	AGFG1	3267
hsa-miR-320b	PLS1	5357
hsa-miR-320b	LPPR1	54886
hsa-miR-320b	ANKRD13A	88455
hsa-miR-320b	LAMC1	3915
hsa-miR-320b	RAB27A	5873
hsa-miR-320b	TDP1	55775
hsa-miR-320b	FAM199X	139231
hsa-miR-320b	KLF5	688
hsa-miR-320b	DHDDS	79947
hsa-miR-320b	CEP120	153241
hsa-miR-320b	SEC22C	9117
hsa-miR-320b	SYNRG	11276
hsa-miR-320b	BMPR1A	657
hsa-miR-320b	ETV1	2115
hsa-miR-320b	SLCO1A2	6579
hsa-miR-320b	TRAPPC8	22878
hsa-miR-320b	PPHLN1	51535
hsa-miR-320b	C21orf62	56245
hsa-miR-320b	2018-09-02	4735
hsa-miR-320b	TCEB1	6921
hsa-miR-320b	SHCBP1	79801
hsa-miR-320b	YPEL2	388403
hsa-miR-320b	KIAA1324	57535
hsa-miR-320b	GSPT1	2935
hsa-miR-320b	SYTL4	94121
hsa-miR-320b	TPM3	7170
hsa-miR-320b	SV2B	9899
hsa-miR-320b	NAT1	9
hsa-miR-320b	DBN1	1627
hsa-miR-320b	MXD1	4084
hsa-miR-320b	BAG5	9529
hsa-miR-320b	DISC1	27185
hsa-miR-320b	ATP5SL	55101
hsa-miR-320b	EIF4B	1975
hsa-miR-320b	PBX3	5090
hsa-miR-320b	GNE	10020
hsa-miR-320b	HP1BP3	50809
hsa-miR-320b	PRPF40A	55660
hsa-miR-320b	FAM160B1	57700
hsa-miR-320b	MIER3	166968
hsa-miR-320b	CX3CR1	1524
hsa-miR-320b	CYTH1	9267
hsa-miR-320b	RAB18	22931
hsa-miR-320b	CHEK1	1111
hsa-miR-320b	XPO1	7514
hsa-miR-320b	DPH3	285381
hsa-miR-320b	USP25	29761
hsa-miR-320b	GRIN2A	2903
hsa-miR-320b	LARS	51520
hsa-miR-320b	JHDM1D	80853
hsa-miR-320b	SMAP1	60682
hsa-miR-320b	BBS5	129880
hsa-miR-320b	ZSCAN26	7741
hsa-miR-320b	SYNCRIP	10492
hsa-miR-320b	TMEM108	66000
hsa-miR-320b	SREK1	140890
hsa-miR-320b	SEMA5A	9037
hsa-miR-320b	SUB1	10923
hsa-miR-320b	RAB2A	5862
hsa-miR-320b	TOMM34	10953
hsa-miR-320b	PCDHA10	56139
hsa-miR-320b	MRE11A	4361
hsa-miR-320b	CREB3L2	64764
hsa-miR-320b	NAP1L5	266812
hsa-miR-320b	ST6GAL2	84620
hsa-miR-320b	EXO1	9156
hsa-miR-320b	PRAMEF18	391003
hsa-miR-320b	MED1	5469
hsa-miR-320b	ALKBH5	54890
hsa-miR-320b	CCDC149	91050
hsa-miR-320b	LAMP2	3920
hsa-miR-320b	ACOT13	55856
hsa-miR-320b	CACNB4	785
hsa-miR-320b	MCMDC2	157777
hsa-miR-320b	BNIP3	664
hsa-miR-320b	HLTF	6596
hsa-miR-320b	KIN	22944
hsa-miR-320b	NAA38	51691
hsa-miR-320b	BAALC	79870
hsa-miR-320b	RGS9BP	388531
hsa-miR-320b	FNIP2	57600
hsa-miR-320b	HLCS	3141
hsa-miR-320b	HELZ	9931
hsa-miR-320b	DIO2	1734
hsa-miR-320b	SMAD9	4093
hsa-miR-320b	ENTPD4	9583
hsa-miR-320b	EIF4E	1977
hsa-miR-320b	PCSK2	5126
hsa-miR-320b	ATP9A	10079
hsa-miR-320b	GOLT1B	51026
hsa-miR-320b	ENAH	55740
hsa-miR-320b	KITLG	4254
hsa-miR-320b	SDHA	6389
hsa-miR-320b	MIER1	57708
hsa-miR-320b	QSOX2	169714
hsa-miR-320b	APOL6	80830
hsa-miR-320b	MSRB3	253827
hsa-miR-320b	COPS2	9318
hsa-miR-320b	MYH15	22989
hsa-miR-320b	FUS	2521
hsa-miR-320b	YWHAH	7533
hsa-miR-320b	TMOD3	29766
hsa-miR-320b	CAMSAP2	23271
hsa-miR-320b	KIAA1715	80856
hsa-miR-320b	PPARGC1B	133522
hsa-miR-320b	C18orf25	147339
hsa-miR-320b	MAP7	9053
hsa-miR-320b	SERINC3	10955
hsa-miR-320b	BCAT1	586
hsa-miR-320b	RAC1	5879
hsa-miR-320b	METAP2	10988
hsa-miR-320b	GCNT4	51301
hsa-miR-320b	CEP85	64793
hsa-miR-320b	ANKRD52	283373
hsa-miR-320b	ETFA	2108
hsa-miR-320b	MASTL	84930
hsa-miR-320b	WTAP	9589
hsa-miR-320b	PCSK7	9159
hsa-miR-320b	METTL10	399818
hsa-miR-320b	IDE	3416
hsa-miR-320b	PPM1A	5494
hsa-miR-320b	MTDH	92140
hsa-miR-320b	SLC25A36	55186
hsa-miR-320b	LEPR	3953
hsa-miR-320b	NXT2	55916
hsa-miR-320b	CANX	821
hsa-miR-320b	LDHAL6A	160287
hsa-miR-320b	DDX42	11325
hsa-miR-320b	MPPED2	744
hsa-miR-320b	TROVE2	6738
hsa-miR-320b	PSD3	23362
hsa-miR-320b	MST4	51765
hsa-miR-320b	GPCPD1	56261
hsa-miR-320b	ZNF470	388566
hsa-miR-320b	ZFP14	57677
hsa-miR-320b	HOXA5	3202
hsa-miR-320b	TPR	7175
hsa-miR-320b	AKT3	10000
hsa-miR-320b	MAT2A	4144
hsa-miR-320b	ASPH	444
hsa-miR-320b	PHF1	5252
hsa-miR-320b	PLXNC1	10154
hsa-miR-320b	SEPSECS	51091
hsa-miR-320b	MKLN1	4289
hsa-miR-320b	ST3GAL1	6482
hsa-miR-320b	GPR107	57720
hsa-miR-320b	SPTSSA	171546
hsa-miR-320b	JAM3	83700
hsa-miR-320b	B4GALT6	9331
hsa-miR-320b	LIMCH1	22998
hsa-miR-320b	COX11	1353
hsa-miR-320b	ULK1	8408
hsa-miR-320b	PPIL6	285755
hsa-miR-320b	TFCP2L1	29842
hsa-miR-320b	SASH1	23328
hsa-miR-320b	KLF13	51621
hsa-miR-320b	THAP2	83591
hsa-miR-320b	BLOC1S5	63915
hsa-miR-320b	DDX54	79039
hsa-miR-320b	BVES	11149
hsa-miR-320b	RAD21	5885
hsa-miR-320b	ZDHHC3	51304
hsa-miR-320b	PCDHA7	56141
hsa-miR-320b	MT2A	4502
hsa-miR-320b	NABP1	64859
hsa-miR-320b	FAM126B	285172
hsa-miR-320b	XPR1	9213
hsa-miR-320b	C6orf201	404220
hsa-miR-320b	TMEM255A	55026
hsa-miR-320b	IL5RA	3568
hsa-miR-320b	PPM1B	5495
hsa-miR-320b	DNER	92737
hsa-miR-320b	MRPS18B	28973
hsa-miR-320b	RAP1A	5906
hsa-miR-320b	PCDHA6	56142
hsa-miR-320b	HECTD2	143279
hsa-miR-320b	RUNX2	860
hsa-miR-320b	WLS	79971
hsa-miR-320b	ZMYM5	9205
hsa-miR-320b	VSIG4	11326
hsa-miR-320b	TAF5	6877
hsa-miR-320b	HEY1	23462
hsa-miR-320b	SPPL2B	56928
hsa-miR-320b	PAIP2B	400961
hsa-miR-320b	CEP41	95681
hsa-miR-320b	NR2C2	7182
hsa-miR-320b	GNPDA1	10007
hsa-miR-320b	CYTIP	9595
hsa-miR-320b	SH3GLB1	51100
hsa-miR-320b	MLF1	4291
hsa-miR-320b	WDR19	57728
hsa-miR-320b	ZNF367	195828
hsa-miR-320b	DHX15	1665
hsa-miR-320b	KATNAL1	84056
hsa-miR-320b	2018-09-15	9403
hsa-miR-320b	CPD	1362
hsa-miR-320b	GABRA5	2558
hsa-miR-320b	CGGBP1	8545
hsa-miR-320b	YIPF6	286451
hsa-miR-320b	HUNK	30811
hsa-miR-320b	VPS39	23339
hsa-miR-320b	GUCY1A3	2982
hsa-miR-320b	TMEM47	83604
hsa-miR-320b	JMY	133746
hsa-miR-320b	ZNF223	7766
hsa-miR-320b	PDLIM5	10611
hsa-miR-320b	MAPK1IP1L	93487
hsa-miR-320b	AK4	205
hsa-miR-320b	PDIK1L	149420
hsa-miR-320b	IRAK3	11213
hsa-miR-320b	MRPL35	51318
hsa-miR-320b	MTRR	4552
hsa-miR-320b	SSR1	6745
hsa-miR-320b	TRPM8	79054
hsa-miR-320b	TCAIM	285343
hsa-miR-320b	PRPF38A	84950
hsa-miR-320b	MTSS1	9788
hsa-miR-320b	CCPG1	9236
hsa-miR-320b	RBMXL1	494115
hsa-miR-320b	ATG2B	55102
hsa-miR-320b	ZBTB44	29068
hsa-miR-320b	YOD1	55432
hsa-miR-320b	LIFR	3977
hsa-miR-320b	RASA1	5921
hsa-miR-320b	RNF20	56254
hsa-miR-320b	C15orf61	145853
hsa-miR-320b	CD47	961
hsa-miR-320b	PHC3	80012
hsa-miR-320b	ADAL	161823
hsa-miR-320b	LRRFIP1	9208
hsa-miR-320b	MORC3	23515
hsa-miR-320b	BRWD1	54014
hsa-miR-320b	NPAS2	4862
hsa-miR-320b	DNAJB14	79982
hsa-miR-320b	MTFMT	123263
hsa-miR-320b	TSC1	7248
hsa-miR-320b	BCL2L11	10018
hsa-miR-320b	N4BP1	9683
hsa-miR-320b	PNN	5411
hsa-miR-320b	IPO7	10527
hsa-miR-320b	STIL	6491
hsa-miR-320b	CREBZF	58487
hsa-miR-320b	ZNF449	203523
hsa-miR-320b	SFTA3	253970
hsa-miR-320b	ZRANB2	9406
hsa-miR-320b	CUX1	1523
hsa-miR-320b	CDS2	8760
hsa-miR-320b	TRIM59	286827
hsa-miR-320b	DESI2	51029
hsa-miR-320b	ANGEL1	23357
hsa-miR-320b	HIVEP2	3097
hsa-miR-320b	CHIC1	53344
hsa-miR-320b	TMEM139	135932
hsa-miR-320b	TUSC3	7991
hsa-miR-320b	SMU1	55234
hsa-miR-320b	TMEM123	114908
hsa-miR-320b	AR	367
hsa-miR-320b	DCAF10	79269
hsa-miR-320b	SEC63	11231
hsa-miR-320b	WAC	51322
hsa-miR-320b	PCDHA5	56143
hsa-miR-320b	STAT4	6775
hsa-miR-320b	ZNF343	79175
hsa-miR-320b	C12orf5	57103
hsa-miR-320b	KDSR	2531
hsa-miR-320b	TANC1	85461
hsa-miR-320b	TFPI	7035
hsa-miR-320b	SNX30	401548
hsa-miR-320b	IGF1R	3480
hsa-miR-320b	ZNF704	619279
hsa-miR-320b	C17orf80	55028
hsa-miR-320b	MRPL22	29093
hsa-miR-320b	ENOSF1	55556
hsa-miR-320b	LPL	4023
hsa-miR-320b	RCN2	5955
hsa-miR-320b	C5orf15	56951
hsa-miR-320b	CMTM4	146223
hsa-miR-320b	CDH2	1000
hsa-miR-320b	FBXO11	80204
hsa-miR-320b	GIMAP1	170575
hsa-miR-320b	FGB	2244
hsa-miR-320b	TDG	6996
hsa-miR-320b	SLC7A11	23657
hsa-miR-320b	LZTFL1	54585
hsa-miR-320b	ROR2	4920
hsa-miR-320b	WWC2	80014
hsa-miR-320b	MSI2	124540
hsa-miR-320b	DLX1	1745
hsa-miR-320b	UTP14C	9724
hsa-miR-320b	TGOLN2	10618
hsa-miR-320b	REEP3	221035
hsa-miR-320b	SLC26A2	1836
hsa-miR-320b	SLC10A7	84068
hsa-miR-320b	C8orf46	254778
hsa-miR-320b	PMPCB	9512
hsa-miR-320b	GCNT2	2651
hsa-miR-320b	RIOK3	8780
hsa-miR-320b	ZBTB8OS	339487
hsa-miR-320b	PDK1	5163
hsa-miR-320b	RIPPLY3	53820
hsa-miR-320b	PCGF5	84333
hsa-miR-320b	PAPD5	64282
hsa-miR-320b	SMARCA5	8467
hsa-miR-320b	TMEM39A	55254
hsa-miR-320b	NUS1	116150
hsa-miR-320b	TMEM231	79583
hsa-miR-320b	TNFRSF17	608
hsa-miR-320b	RASGRF2	5924
hsa-miR-320b	ZNF107	51427
hsa-miR-320b	PCDHA3	56145
hsa-miR-320b	PPP1R12B	4660
hsa-miR-320b	BHLHE41	79365
hsa-miR-320b	CNOT6	57472
hsa-miR-320b	GABRG1	2565
hsa-miR-320b	ZC3H12C	85463
hsa-miR-320b	TGM2	7052
hsa-miR-320b	SMG7	9887
hsa-miR-320b	IL6ST	3572
hsa-miR-320b	PRAMEF19	645414
hsa-miR-320b	ARHGEF26	26084
hsa-miR-320b	CNOT7	29883
hsa-miR-320b	RHD	6007
hsa-miR-320b	PCNP	57092
hsa-miR-320b	RC3H1	149041
hsa-miR-320b	ADAMTS15	170689
hsa-miR-320b	CBX3	11335
hsa-miR-320b	TPH1	7166
hsa-miR-320b	METTL7A	25840
hsa-miR-320b	FAM63B	54629
hsa-miR-320b	OGN	4969
hsa-miR-320b	NAA15	80155
hsa-miR-320b	CANT1	124583
hsa-miR-320b	ADH5	128
hsa-miR-320b	DTNA	1837
hsa-miR-320b	LAPTM4A	9741
hsa-miR-320b	PRKCB	5579
hsa-miR-320b	IGF2BP3	10643
hsa-miR-320b	DCTN4	51164
hsa-miR-320b	PCDHAC2	56134
hsa-miR-320b	XPNPEP3	63929
hsa-miR-320b	SDK1	221935
hsa-miR-320b	PHC1	1911
hsa-miR-320b	DOT1L	84444
hsa-miR-320b	MCOLN2	255231
hsa-miR-320b	MTX3	345778
hsa-miR-320b	SIRT5	23408
hsa-miR-320b	INO80D	54891
hsa-miR-320b	PEX12	5193
hsa-miR-320b	POLE3	54107
hsa-miR-320b	LCOR	84458
hsa-miR-320b	MRPS25	64432
hsa-miR-320b	TMEM144	55314
hsa-miR-320b	FAM129A	116496
hsa-miR-320b	ARL3	403
hsa-miR-320b	VEPH1	79674
hsa-miR-320b	SLC16A14	151473
hsa-miR-320b	PRDM1	639
hsa-miR-320b	RBMS2	5939
hsa-miR-320b	PCDHA2	56146
hsa-miR-320b	C1orf95	375057
hsa-miR-320b	RNF150	57484
hsa-miR-320b	HN1L	90861
hsa-miR-320b	TPD52L2	7165
hsa-miR-320b	CCDC152	100129792
hsa-miR-320b	IRF6	3664
hsa-miR-320b	ZNF705D	728957
hsa-miR-320b	PTPN14	5784
hsa-miR-320b	TOX	9760
hsa-miR-320b	ZBTB21	49854
hsa-miR-320b	CYP20A1	57404
hsa-miR-320b	FAM117B	150864
hsa-miR-320b	LRRC27	80313
hsa-miR-320b	ZSCAN25	221785
hsa-miR-320b	TRPC5	7224
hsa-miR-320b	KIF26A	26153
hsa-miR-320b	TMEM106B	54664
hsa-miR-320b	KLHL15	80311
hsa-miR-320b	VHL	7428
hsa-miR-320b	NR3C2	4306
hsa-miR-320b	MAPK1	5594
hsa-miR-320b	GNA13	10672
hsa-miR-320b	PCDHAC1	56135
hsa-miR-320b	SMARCD2	6603
hsa-miR-320b	MFSD8	256471
hsa-miR-320b	PDXDC1	23042
hsa-miR-320b	GFPT1	2673
hsa-miR-320b	SGPL1	8879
hsa-miR-320b	HOXA10	3206
hsa-miR-320b	C5orf22	55322
hsa-miR-320b	TSHZ2	128553
hsa-miR-320b	ATP6V1C1	528
hsa-miR-320b	TTC14	151613
hsa-miR-320b	RIT1	6016
hsa-miR-320b	ZNF652	22834
hsa-miR-320b	RNF138	51444
hsa-miR-320b	PCDHA1	56147
hsa-miR-320b	SH3TC2	79628
hsa-miR-320b	FAM89A	375061
hsa-miR-320b	RIMKLB	57494
hsa-miR-320b	TPM1	7168
hsa-miR-320b	KAL1	3730
hsa-miR-320b	LOC100132146	100132146
hsa-miR-320b	AP3M1	26985
hsa-miR-320b	IL12B	3593
hsa-miR-320b	MMP16	4325
hsa-miR-320b	KIAA0247	9766
hsa-miR-320b	RPGR	6103
hsa-miR-320b	NLN	57486
hsa-miR-320b	CCR7	1236
hsa-miR-320b	KIAA1324L	222223
hsa-miR-320b	GCM2	9247
hsa-miR-320b	CBLN1	869
hsa-miR-320b	IL17RD	54756
hsa-miR-320b	VIM	7431
hsa-miR-320b	FAM69B	138311
hsa-miR-320b	TNKS	8658
hsa-miR-320b	RAD51AP1	10635
hsa-miR-320b	PTEN	5728
hsa-miR-320b	MAP3K2	10746
hsa-miR-320b	PCDHA13	56136
hsa-miR-320b	MLLT3	4300
hsa-miR-320b	SNTB1	6641
hsa-miR-320b	EBF2	64641
hsa-miR-320b	MEGF9	1955
hsa-miR-320b	BOD1L1	259282
hsa-miR-320b	2018-09-06	23157
hsa-miR-320b	GLUD1	2746
hsa-miR-320b	MAST4	375449
hsa-miR-320b	PLEK	5341
hsa-miR-320b	RUFY2	55680
hsa-miR-320b	EMB	133418
hsa-miR-320b	KLHL36	79786
hsa-miR-320b	CCDC50	152137
hsa-miR-320b	BNC1	646
hsa-miR-320b	SLC5A3	6526
hsa-miR-320b	ATG14	22863
hsa-miR-320b	PCDH19	57526
hsa-miR-320b	GOLGA1	2800
hsa-miR-320b	MOB1B	92597
hsa-miR-320b	ZNF605	100289635
hsa-miR-320b	AFF4	27125
hsa-miR-320b	MN1	4330
hsa-miR-320b	MRPL19	9801
hsa-miR-320b	MBL2	4153
hsa-miR-320b	RAB11FIP2	22841
hsa-miR-320b	VLDLR	7436
hsa-miR-320b	DUSP16	80824
hsa-miR-320b	RBM25	58517
hsa-miR-320b	ATP6V1A	523
hsa-miR-320b	PTGFRN	5738
hsa-miR-320b	CLPX	10845
hsa-miR-320b	NIN	51199
hsa-miR-320b	PCDHA12	56137
hsa-miR-320b	NUCKS1	64710
hsa-miR-320b	BRWD3	254065
hsa-miR-320b	EIF2B1	1967
hsa-miR-320b	MTMR7	9108
hsa-miR-320b	ABHD13	84945
hsa-miR-320b	ITGA4	3676
hsa-miR-320b	BMI1	648
hsa-miR-320b	BMP6	654
hsa-miR-320b	SLC9A2	6549
hsa-miR-320b	NAP1L1	4673
hsa-miR-320b	TBL1XR1	79718
hsa-miR-320b	LHFPL3	375612
hsa-miR-320b	CAPRIN1	4076
hsa-miR-320b	ONECUT2	9480
hsa-miR-320b	MYC	4609
hsa-miR-320b	DLX5	1749
hsa-miR-320b	NOD2	64127
hsa-miR-320c	HELZ	9931
hsa-miR-320c	BCAT1	586
hsa-miR-320c	SIRT5	23408
hsa-miR-320c	RUNX2	860
hsa-miR-320c	RAD21	5885
hsa-miR-320c	ESRRG	2104
hsa-miR-320c	ATP5SL	55101
hsa-miR-320c	MCL1	4170
hsa-miR-320c	WNK1	65125
hsa-miR-320c	TRAPPC8	22878
hsa-miR-320c	CEP85	64793
hsa-miR-320c	ALDH6A1	4329
hsa-miR-320c	SRP19	6728
hsa-miR-320c	TTC14	151613
hsa-miR-320c	BAALC	79870
hsa-miR-320c	SNX30	401548
hsa-miR-320c	SYNRG	11276
hsa-miR-320c	HOXA5	3202
hsa-miR-320c	CX3CR1	1524
hsa-miR-320c	ZNF107	51427
hsa-miR-320c	GLUD1	2746
hsa-miR-320c	PCDHA1	56147
hsa-miR-320c	ENTPD4	9583
hsa-miR-320c	ALKBH5	54890
hsa-miR-320c	MED1	5469
hsa-miR-320c	CCDC149	91050
hsa-miR-320c	ZSCAN26	7741
hsa-miR-320c	MTX3	345778
hsa-miR-320c	HDX	139324
hsa-miR-320c	RAB27A	5873
hsa-miR-320c	CANT1	124583
hsa-miR-320c	NRP1	8829
hsa-miR-320c	ZNF704	619279
hsa-miR-320c	QSOX2	169714
hsa-miR-320c	SYNCRIP	10492
hsa-miR-320c	CACNB4	785
hsa-miR-320c	ARHGEF26	26084
hsa-miR-320c	DAG1	1605
hsa-miR-320c	TAF5	6877
hsa-miR-320c	ETV1	2115
hsa-miR-320c	PPP1R9A	55607
hsa-miR-320c	USP25	29761
hsa-miR-320c	2018-09-02	4735
hsa-miR-320c	DDHD1	80821
hsa-miR-320c	TCEB1	6921
hsa-miR-320c	ADAMTS15	170689
hsa-miR-320c	THAP2	83591
hsa-miR-320c	CYTH1	9267
hsa-miR-320c	NAT1	9
hsa-miR-320c	CBX3	11335
hsa-miR-320c	MAT2A	4144
hsa-miR-320c	APTX	54840
hsa-miR-320c	AGFG1	3267
hsa-miR-320c	PCDH19	57526
hsa-miR-320c	ATP9A	10079
hsa-miR-320c	ACOT13	55856
hsa-miR-320c	DTNA	1837
hsa-miR-320c	BANP	54971
hsa-miR-320c	LAMP2	3920
hsa-miR-320c	SMAP1	60682
hsa-miR-320c	TOMM34	10953
hsa-miR-320c	MIER1	57708
hsa-miR-320c	SH3GL1	6455
hsa-miR-320c	FAM69B	138311
hsa-miR-320c	SEC22C	9117
hsa-miR-320c	ANKRD52	283373
hsa-miR-320c	ZNF268	10795
hsa-miR-320c	RUNX1T1	862
hsa-miR-320c	ZBTB21	49854
hsa-miR-320c	ULK1	8408
hsa-miR-320c	CDK6	1021
hsa-miR-320c	DCTN4	51164
hsa-miR-320c	FOXM1	2305
hsa-miR-320c	PCDHA12	56137
hsa-miR-320c	PCSK7	9159
hsa-miR-320c	PPHLN1	51535
hsa-miR-320c	PBX1	5087
hsa-miR-320c	LCOR	84458
hsa-miR-320c	TPM3	7170
hsa-miR-320c	MFSD8	256471
hsa-miR-320c	MTDH	92140
hsa-miR-320c	WTAP	9589
hsa-miR-320c	ASPH	444
hsa-miR-320c	LIMCH1	22998
hsa-miR-320c	AK4	205
hsa-miR-320c	PHF1	5252
hsa-miR-320c	SREK1	140890
hsa-miR-320c	AKT3	10000
hsa-miR-320c	RAP1A	5906
hsa-miR-320c	KITLG	4254
hsa-miR-320c	KIN	22944
hsa-miR-320c	NABP1	64859
hsa-miR-320c	MRE11A	4361
hsa-miR-320c	CCDC50	152137
hsa-miR-320c	DHDDS	79947
hsa-miR-320c	RBMXL1	494115
hsa-miR-320c	IDE	3416
hsa-miR-320c	GNAI3	2773
hsa-miR-320c	C21orf62	56245
hsa-miR-320c	CREB5	9586
hsa-miR-320c	PPM1A	5494
hsa-miR-320c	MOB1B	92597
hsa-miR-320c	RAC1	5879
hsa-miR-320c	TSHZ2	128553
hsa-miR-320c	SEMA5A	9037
hsa-miR-320c	PRAMEF19	645414
hsa-miR-320c	SPTSSA	171546
hsa-miR-320c	AP3M1	26985
hsa-miR-320c	DBN1	1627
hsa-miR-320c	TMOD3	29766
hsa-miR-320c	KIAA1324L	222223
hsa-miR-320c	TMEM47	83604
hsa-miR-320c	COPS2	9318
hsa-miR-320c	ADH5	128
hsa-miR-320c	KIAA1324	57535
hsa-miR-320c	PLXNC1	10154
hsa-miR-320c	NXT2	55916
hsa-miR-320c	EIF4B	1975
hsa-miR-320c	LEPR	3953
hsa-miR-320c	METAP2	10988
hsa-miR-320c	GPR107	57720
hsa-miR-320c	EXO1	9156
hsa-miR-320c	PPIL6	285755
hsa-miR-320c	FUS	2521
hsa-miR-320c	CGGBP1	8545
hsa-miR-320c	CTSC	1075
hsa-miR-320c	PCDHA11	56138
hsa-miR-320c	XPR1	9213
hsa-miR-320c	KLF13	51621
hsa-miR-320c	DCTN5	84516
hsa-miR-320c	TPR	7175
hsa-miR-320c	BOD1L1	259282
hsa-miR-320c	DNER	92737
hsa-miR-320c	PDXDC1	23042
hsa-miR-320c	AR	367
hsa-miR-320c	PLS1	5357
hsa-miR-320c	MAST4	375449
hsa-miR-320c	HECTD2	143279
hsa-miR-320c	GNPDA1	10007
hsa-miR-320c	CD47	961
hsa-miR-320c	RASA1	5921
hsa-miR-320c	MKLN1	4289
[truncated: 1,335 more rows]

## Sheet:  Purple
miRNA	Target Gene	EntrezID
hsa-miR-129-2-3p	MYO1B	4430
hsa-miR-129-2-3p	GFRA1	2674
hsa-miR-129-2-3p	POP1	10940
hsa-miR-129-2-3p	PIK3IP1	113791
hsa-miR-129-2-3p	NUCKS1	64710
hsa-miR-129-2-3p	RAP1B	5908
hsa-miR-129-2-3p	HHAT	55733
hsa-miR-129-2-3p	C14orf28	122525
hsa-miR-129-2-3p	TCF7	6932
hsa-miR-129-2-3p	LARGE	9215
hsa-miR-129-2-3p	SCD5	79966
hsa-miR-129-2-3p	RNF8	9025
hsa-miR-129-2-3p	MEF2A	4205
hsa-miR-129-2-3p	CBX6	23466
hsa-miR-129-2-3p	TMEM136	219902
hsa-miR-129-2-3p	ACADM	34
hsa-miR-129-2-3p	BNIP3L	665
hsa-miR-129-2-3p	CAMKK2	10645
hsa-miR-129-2-3p	C2orf88	84281
hsa-miR-129-2-3p	RRM2B	50484
hsa-miR-129-2-3p	PPP6C	5537
hsa-miR-129-2-3p	C18orf42	642597
hsa-miR-129-2-3p	PFKFB2	5208
hsa-miR-129-2-3p	GJA5	2702
hsa-miR-129-2-3p	SH3TC2	79628
hsa-miR-129-2-3p	DYNLL2	140735
hsa-miR-129-2-3p	CCP110	9738
hsa-miR-129-2-3p	CEP63	80254
hsa-miR-129-2-3p	TOMM20	9804
hsa-miR-129-2-3p	SLC24A2	25769
hsa-miR-129-2-3p	AK4	205
hsa-miR-129-2-3p	CDS1	1040
hsa-miR-129-2-3p	JPH4	84502
hsa-miR-129-2-3p	RAB8B	51762
hsa-miR-129-2-3p	GOLT1B	51026
hsa-miR-129-2-3p	PLN	5350
hsa-miR-129-2-3p	OSBPL10	114884
hsa-miR-129-2-3p	BAALC	79870
hsa-miR-129-2-3p	VSIG10L	147645
hsa-miR-129-2-3p	STX6	10228
hsa-miR-129-2-3p	ATP5G3	518
hsa-miR-129-2-3p	CHML	1122
hsa-miR-129-2-3p	ZCRB1	85437
hsa-miR-129-2-3p	CPSF2	53981
hsa-miR-129-2-3p	PKIA	5569
hsa-miR-129-2-3p	ZNF639	51193
hsa-miR-129-2-3p	MED1	5469
hsa-miR-129-2-3p	GNRHR	2798
hsa-miR-129-2-3p	ZNF507	22847
hsa-miR-129-2-3p	TIAM1	7074
hsa-miR-129-2-3p	SUPT7L	9913
hsa-miR-129-2-3p	ZNF436	80818
hsa-miR-129-2-3p	PAIP1	10605
hsa-miR-129-2-3p	AFF1	4299
hsa-miR-129-2-3p	HECTD1	25831
hsa-miR-129-2-3p	GABRA1	2554
hsa-miR-129-2-3p	CHRNA2	1135
hsa-miR-129-2-3p	GNA13	10672
hsa-miR-129-2-3p	DIXDC1	85458
hsa-miR-129-2-3p	FAM206A	54942
hsa-miR-129-2-3p	PRKCE	5581
hsa-miR-129-2-3p	UCHL5	51377
hsa-miR-129-2-3p	PASK	23178
hsa-miR-129-2-3p	COX20	116228
hsa-miR-129-2-3p	PROSER2	254427
hsa-miR-129-2-3p	SCARF1	8578
hsa-miR-129-2-3p	RTN3	10313
hsa-miR-129-2-3p	FCRL5	83416
hsa-miR-129-2-3p	PNISR	25957
hsa-miR-129-2-3p	HNRNPA3	220988
hsa-miR-129-2-3p	F5	2153
hsa-miR-129-2-3p	NFAT5	10725
hsa-miR-129-2-3p	GOLPH3L	55204
hsa-miR-129-2-3p	PTPN3	5774
hsa-miR-129-2-3p	FADS1	3992
hsa-miR-129-2-3p	FOPNL	123811
hsa-miR-129-2-3p	AIF1L	83543
hsa-miR-129-2-3p	RFX3	5991
hsa-miR-129-2-3p	THEMIS	387357
hsa-miR-129-2-3p	PDE10A	10846
hsa-miR-129-2-3p	MLLT6	4302
hsa-miR-129-2-3p	C17orf58	284018
hsa-miR-129-2-3p	GRIN2D	2906
hsa-miR-129-2-3p	MCU	90550
hsa-miR-129-2-3p	VPS53	55275
hsa-miR-129-2-3p	GFOD1	54438
hsa-miR-129-2-3p	CXCL6	6372
hsa-miR-129-2-3p	SCN3B	55800
hsa-miR-129-2-3p	PKN2	5586
hsa-miR-129-2-3p	SMAD3	4088
hsa-miR-129-2-3p	STARD4	134429
hsa-miR-129-2-3p	RAB31	11031
hsa-miR-129-2-3p	NPTN	27020
hsa-miR-129-2-3p	IL17A	3605
hsa-miR-129-2-3p	SYTL5	94122
hsa-miR-129-2-3p	VEZT	55591
hsa-miR-129-2-3p	C10orf118	55088
hsa-miR-129-2-3p	UNK	85451
hsa-miR-129-2-3p	MAP2K4	6416
hsa-miR-129-2-3p	CAMK1G	57172
hsa-miR-129-2-3p	PTGER4	5734
hsa-miR-129-2-3p	GCOM1	145781
hsa-miR-129-2-3p	HCN1	348980
hsa-miR-129-2-3p	KPNA4	3840
hsa-miR-129-2-3p	ENOSF1	55556
hsa-miR-129-2-3p	C9orf69	90120
hsa-miR-129-2-3p	SNRPE	6635
hsa-miR-129-2-3p	RFX7	64864
hsa-miR-129-2-3p	RDH10	157506
hsa-miR-129-2-3p	GPD1L	23171
hsa-miR-129-2-3p	MTF1	4520
hsa-miR-129-2-3p	PTAR1	375743
hsa-miR-129-2-3p	KIDINS220	57498
hsa-miR-129-2-3p	XKR4	114786
hsa-miR-129-2-3p	STRN	6801
hsa-miR-129-2-3p	CCDC102B	79839
hsa-miR-129-2-3p	GSE1	23199
hsa-miR-129-2-3p	AMFR	267
hsa-miR-129-2-3p	NPTXR	23467
hsa-miR-129-2-3p	PDCD2	5134
hsa-miR-129-2-3p	MAP3K1	4214
hsa-miR-129-2-3p	HSPH1	10808
hsa-miR-129-2-3p	EGLN3	112399
hsa-miR-129-2-3p	ARHGAP31	57514
hsa-miR-129-2-3p	FAM210B	116151
hsa-miR-129-2-3p	TMF1	7110
hsa-miR-129-2-3p	BDKRB2	624
hsa-miR-129-2-3p	LPAR3	23566
hsa-miR-129-2-3p	SOX4	6659
hsa-miR-129-2-3p	CDK6	1021
hsa-miR-129-2-3p	BCL2L2	599
hsa-miR-129-2-3p	MYC	4609
hsa-miR-193b-3p	ST8SIA4	7903
hsa-miR-193b-3p	NEDD9	4739
hsa-miR-193b-3p	RUNX1T1	862
hsa-miR-193b-3p	YWHAZ	7534
hsa-miR-193b-3p	ARMC1	55156
hsa-miR-193b-3p	PCSK2	5126
hsa-miR-193b-3p	THNSL1	79896
hsa-miR-193b-3p	FAM178A	55719
hsa-miR-193b-3p	PLAU	5328
hsa-miR-193b-3p	ARPC5	10092
hsa-miR-193b-3p	LUZP1	7798
hsa-miR-193b-3p	GRB7	2886
hsa-miR-193b-3p	SYTL5	94122
hsa-miR-193b-3p	C9orf96	169436
hsa-miR-193b-3p	SNX1	6642
hsa-miR-193b-3p	CADM1	23705
hsa-miR-193b-3p	PIGA	5277
hsa-miR-193b-3p	DYRK2	8445
hsa-miR-193b-3p	NT5E	4907
hsa-miR-193b-3p	ADAP2	55803
hsa-miR-193b-3p	ATF7IP2	80063
hsa-miR-193b-3p	H2AFJ	55766
hsa-miR-193b-3p	PRNP	5621
hsa-miR-193b-3p	ABI2	10152
hsa-miR-193b-3p	DOK6	220164
hsa-miR-193b-3p	SS18L1	26039
hsa-miR-193b-3p	STX16	8675
hsa-miR-193b-3p	OAS2	4939
hsa-miR-193b-3p	SCYL3	57147
hsa-miR-193b-3p	DCAF17	80067
hsa-miR-193b-3p	AGPAT1	10554
hsa-miR-193b-3p	ING1	3621
hsa-miR-193b-3p	CEP41	95681
hsa-miR-193b-3p	SLC39A5	283375
hsa-miR-193b-3p	SON	6651
hsa-miR-193b-3p	AFF4	27125
hsa-miR-193b-3p	CRKL	1399
hsa-miR-193b-3p	CREBZF	58487
hsa-miR-193b-3p	OSMR	9180
hsa-miR-193b-3p	OPHN1	4983
hsa-miR-193b-3p	DCTN5	84516
hsa-miR-193b-3p	RAB22A	57403
hsa-miR-193b-3p	CSTF1	1477
hsa-miR-193b-3p	PLXNA2	5362
hsa-miR-193b-3p	FAM109B	150368
hsa-miR-193b-3p	C17orf58	284018
hsa-miR-193b-3p	SOS2	6655
hsa-miR-193b-3p	ZBTB44	29068
hsa-miR-193b-3p	EN2	2020
hsa-miR-193b-3p	TTPAL	79183
hsa-miR-193b-3p	GDF11	10220
hsa-miR-193b-3p	P2RX5	5026
hsa-miR-193b-3p	PSRC1	84722
hsa-miR-193b-3p	CARF	79800
hsa-miR-193b-3p	NUP50	10762
hsa-miR-193b-3p	C3orf70	285382
hsa-miR-193b-3p	TNFAIP1	7126
hsa-miR-193b-3p	CAB39	51719
hsa-miR-193b-3p	DCAF7	10238
hsa-miR-193b-3p	PSMA5	5686
hsa-miR-193b-3p	RHAG	6005
hsa-miR-193b-3p	KCNJ2	3759
hsa-miR-193b-3p	RGAG4	340526
hsa-miR-193b-3p	UBP1	7342
hsa-miR-193b-3p	ZYG11B	79699
hsa-miR-193b-3p	SEPT6	23157
hsa-miR-193b-3p	RAPGEF5	9771
hsa-miR-193b-3p	CNBP	7555
hsa-miR-193b-3p	KLHL15	80311
hsa-miR-193b-3p	DMXL2	23312
hsa-miR-193b-3p	ERBB4	2066
hsa-miR-193b-3p	SRSF2	6427
hsa-miR-193b-3p	LPP	4026
hsa-miR-193b-3p	PTAR1	375743
hsa-miR-193b-3p	SLC10A6	345274
hsa-miR-193b-3p	IL17RD	54756
hsa-miR-193b-3p	MKLN1	4289
hsa-miR-193b-3p	MORC4	79710
hsa-miR-193b-3p	ABCB10	23456
hsa-miR-193b-3p	AREL1	9870
hsa-miR-193b-3p	FHDC1	85462
hsa-miR-193b-3p	CACNA1E	777
hsa-miR-193b-3p	USF1	7391
hsa-miR-193b-3p	INO80D	54891
hsa-miR-193b-3p	MMP19	4327
hsa-miR-193b-3p	TVP23B	51030
hsa-miR-193b-3p	ZBTB40	9923
hsa-miR-193b-3p	ACPL2	92370
hsa-miR-193b-3p	FLI1	2313
hsa-miR-193b-3p	XPNPEP1	7511
hsa-miR-193b-3p	PARP16	54956
hsa-miR-193b-3p	KATNBL1	79768
hsa-miR-193b-3p	NT5DC3	51559
hsa-miR-193b-3p	FAM168B	130074
hsa-miR-193b-3p	RAB27B	5874
hsa-miR-193b-3p	ZNF346	23567
hsa-miR-193b-3p	PDPR	55066
hsa-miR-193b-3p	ZBTB5	9925
hsa-miR-193b-3p	MGME1	92667
hsa-miR-193b-3p	FAM84A	151354
hsa-miR-193b-3p	CCND1	595
hsa-miR-193b-3p	ESR1	2099
hsa-miR-193b-3p	PRAP1	118471
hsa-miR-193b-3p	MCL1	4170
hsa-miR-193b-3p	ETS1	2113
hsa-miR-193b-3p	SHMT2	6472
hsa-miR-193b-3p	AKR1C2	1646
hsa-miR-193b-3p	MAX	4149
hsa-miR-193b-3p	KRAS	3845
hsa-miR-193b-3p	RAD51	5888
hsa-miR-193b-3p	MYB	4602
hsa-miR-193b-3p	NF1	4763
hsa-miR-193b-3p	SMAD3	4088
hsa-miR-193b-3p	KIT	3815
hsa-miR-365a-3p	SGK1	6446
hsa-miR-365a-3p	OXR1	55074
hsa-miR-365a-3p	ACVR1C	130399
hsa-miR-365a-3p	DTNA	1837
hsa-miR-365a-3p	ZNF268	10795
hsa-miR-365a-3p	MYCBP	26292
hsa-miR-365a-3p	ARRDC3	57561
hsa-miR-365a-3p	TAC3	6866
hsa-miR-365a-3p	OGFOD3	79701
hsa-miR-365a-3p	ZNF92	168374
hsa-miR-365a-3p	PAX6	5080
hsa-miR-365a-3p	MYLK	4638
hsa-miR-365a-3p	PHF15	23338
hsa-miR-365a-3p	IP6K2	51447
hsa-miR-365a-3p	C14orf142	84520
hsa-miR-365a-3p	ADD3	120
hsa-miR-365a-3p	CSTF1	1477
hsa-miR-365a-3p	CREB5	9586
hsa-miR-365a-3p	SYNJ1	8867
hsa-miR-365a-3p	ARRDC2	27106
hsa-miR-365a-3p	AFAP1L1	134265
hsa-miR-365a-3p	E2F2	1870
hsa-miR-365a-3p	NABP1	64859
hsa-miR-365a-3p	TMPO	7112
hsa-miR-365a-3p	ZNF644	84146
hsa-miR-365a-3p	ZNF493	284443
hsa-miR-365a-3p	MAPK1	5594
hsa-miR-365a-3p	NSL1	25936
hsa-miR-365a-3p	PGC	5225
hsa-miR-365a-3p	SDR42E1	93517
hsa-miR-365a-3p	HDAC9	9734
hsa-miR-365a-3p	TRHDE	29953
hsa-miR-365a-3p	UNC5D	137970
hsa-miR-365a-3p	EPAS1	2034
hsa-miR-365a-3p	HTR1F	3355
hsa-miR-365a-3p	TMEM106C	79022
hsa-miR-365a-3p	ZNF708	7562
hsa-miR-365a-3p	RIT1	6016
hsa-miR-365a-3p	ANKRD17	26057
hsa-miR-365a-3p	RAB27A	5873
hsa-miR-365a-3p	RAB3IP	117177
hsa-miR-365a-3p	NR1D2	9975
hsa-miR-365a-3p	ZDHHC3	51304
hsa-miR-365a-3p	FOXR2	139628
hsa-miR-365a-3p	HOXA9	3205
hsa-miR-365a-3p	IL1RAP	3556
hsa-miR-365a-3p	USP48	84196
hsa-miR-365a-3p	ZNF90	7643
hsa-miR-365a-3p	ZNF619	285267
hsa-miR-365a-3p	RORA	6095
hsa-miR-365a-3p	ARRB2	409
hsa-miR-365a-3p	CYP24A1	1591
hsa-miR-365a-3p	LPGAT1	9926
hsa-miR-365a-3p	GDF11	10220
hsa-miR-365a-3p	SHC1	6464
hsa-miR-365a-3p	ATG2B	55102
hsa-miR-365a-3p	ALG10B	144245
hsa-miR-365a-3p	DCUN1D5	84259
hsa-miR-365a-3p	ZNF99	7652
hsa-miR-365a-3p	POLDIP3	84271
hsa-miR-365a-3p	EHF	26298
hsa-miR-365a-3p	DCDC2	51473
hsa-miR-365a-3p	FAM3C	10447
hsa-miR-365a-3p	CHIC1	53344
hsa-miR-365a-3p	PRPF40A	55660
hsa-miR-365a-3p	ZNF714	148206
hsa-miR-365a-3p	KCNA7	3743
hsa-miR-365a-3p	KCNN3	3782
hsa-miR-365a-3p	SESTD1	91404
hsa-miR-365a-3p	PIK3R3	8503
hsa-miR-365a-3p	ZNF680	340252
hsa-miR-365a-3p	SLC16A2	6567
hsa-miR-365a-3p	NEK2	4751
hsa-miR-365a-3p	PRDM1	639
hsa-miR-365a-3p	RAPGEF4	11069
hsa-miR-365a-3p	SGTB	54557
hsa-miR-365a-3p	LPAR5	57121
hsa-miR-365a-3p	KLB	152831
hsa-miR-365a-3p	NR3C2	4306
hsa-miR-365a-3p	C2orf88	84281
hsa-miR-365a-3p	ZBTB41	360023
hsa-miR-365a-3p	SYPL1	6856
hsa-miR-365a-3p	NFIB	4781
hsa-miR-365a-3p	REV3L	5980
hsa-miR-365a-3p	NAA38	51691
hsa-miR-365a-3p	CELF1	10658
hsa-miR-365a-3p	USP33	23032
hsa-miR-365a-3p	ENTPD7	57089
hsa-miR-365a-3p	KCTD7	154881
hsa-miR-365a-3p	MTR	4548
hsa-miR-365a-3p	WDR37	22884
hsa-miR-365a-3p	FAM91A1	157769
hsa-miR-365a-3p	NCR3LG1	374383
hsa-miR-365a-3p	RBM11	54033
hsa-miR-365a-3p	ACVR1	90
hsa-miR-365a-3p	OSGIN2	734
hsa-miR-365a-3p	USP22	23326
hsa-miR-365a-3p	SRPK1	6732
hsa-miR-365a-3p	LAMP2	3920
hsa-miR-365a-3p	CXorf23	256643
hsa-miR-365a-3p	VGLL3	389136
hsa-miR-365a-3p	TBK1	29110
hsa-miR-365a-3p	CPT1A	1374
hsa-miR-365a-3p	ASF1A	25842
hsa-miR-365a-3p	KIAA1147	57189
hsa-miR-365a-3p	SSTR2	6752
hsa-miR-365a-3p	PRUNE2	158471
hsa-miR-365a-3p	NUBP1	4682
hsa-miR-365a-3p	KIF21B	23046
hsa-miR-365a-3p	FAM227A	646851
hsa-miR-365a-3p	C8orf22	492307
hsa-miR-365a-3p	ZNF148	7707
hsa-miR-365a-3p	P2RY1	5028
hsa-miR-365a-3p	DLAT	1737
hsa-miR-365a-3p	CS	1431
hsa-miR-365a-3p	NUFIP2	57532
hsa-miR-365a-3p	OAZ2	4947
hsa-miR-365a-3p	MTM1	4534
hsa-miR-365a-3p	MEGF10	84466
hsa-miR-365a-3p	CCND1	595
hsa-miR-365a-3p	BCL2	596
hsa-miR-365a-3p	IL6	3569
hsa-miR-365a-3p	BAX	581
hsa-miR-365a-3p	CDC25A	993
hsa-miR-365a-3p	KRAS	3845
hsa-miR-365b-3p	LAMP2	3920
hsa-miR-365b-3p	USP33	23032
hsa-miR-365b-3p	NCR3LG1	374383
hsa-miR-365b-3p	LPAR5	57121
hsa-miR-365b-3p	SRPK1	6732
hsa-miR-365b-3p	TMEM106C	79022
hsa-miR-365b-3p	MYLK	4638
hsa-miR-365b-3p	DTNA	1837
hsa-miR-365b-3p	TMPO	7112
hsa-miR-365b-3p	NFIB	4781
hsa-miR-365b-3p	TBK1	29110
hsa-miR-365b-3p	CXorf23	256643
hsa-miR-365b-3p	SYNJ1	8867
hsa-miR-365b-3p	C2orf88	84281
hsa-miR-365b-3p	ZNF268	10795
hsa-miR-365b-3p	ACVR1C	130399
hsa-miR-365b-3p	KCTD7	154881
hsa-miR-365b-3p	ASF1A	25842
hsa-miR-365b-3p	RORA	6095
hsa-miR-365b-3p	OXR1	55074
hsa-miR-365b-3p	CPT1A	1374
hsa-miR-365b-3p	OSGIN2	734
hsa-miR-365b-3p	NR3C2	4306
hsa-miR-365b-3p	KIF21B	23046
hsa-miR-365b-3p	VGLL3	389136
hsa-miR-365b-3p	KIAA1147	57189
hsa-miR-365b-3p	SSTR2	6752
hsa-miR-365b-3p	NUBP1	4682
hsa-miR-365b-3p	ZNF148	7707
hsa-miR-365b-3p	P2RY1	5028
hsa-miR-365b-3p	ZDHHC3	51304
hsa-miR-365b-3p	FAM227A	646851
hsa-miR-365b-3p	CREB5	9586
hsa-miR-365b-3p	PRUNE2	158471
hsa-miR-365b-3p	NSL1	25936
hsa-miR-365b-3p	DLAT	1737
hsa-miR-365b-3p	CS	1431
hsa-miR-365b-3p	MTM1	4534
hsa-miR-365b-3p	C8orf22	492307
hsa-miR-365b-3p	NUFIP2	57532
hsa-miR-365b-3p	SYPL1	6856
hsa-miR-365b-3p	OGFOD3	79701
hsa-miR-365b-3p	OAZ2	4947
hsa-miR-365b-3p	PIK3R3	8503
hsa-miR-365b-3p	PAX6	5080
hsa-miR-365b-3p	IP6K2	51447
hsa-miR-365b-3p	ACVR1	90
hsa-miR-365b-3p	MEGF10	84466
hsa-miR-365b-3p	ZNF92	168374
hsa-miR-365b-3p	MYCBP	26292
hsa-miR-365b-3p	SGK1	6446
hsa-miR-365b-3p	CSTF1	1477
hsa-miR-365b-3p	PHF15	23338
hsa-miR-365b-3p	ARRDC3	57561
hsa-miR-365b-3p	TAC3	6866
hsa-miR-365b-3p	ADD3	120
hsa-miR-365b-3p	C14orf142	84520
hsa-miR-365b-3p	AFAP1L1	134265
hsa-miR-365b-3p	ARRDC2	27106
hsa-miR-365b-3p	E2F2	1870
hsa-miR-365b-3p	MAPK1	5594
hsa-miR-365b-3p	HTR1F	3355
hsa-miR-365b-3p	NABP1	64859
hsa-miR-365b-3p	ZNF644	84146
hsa-miR-365b-3p	PGC	5225
hsa-miR-365b-3p	HDAC9	9734
hsa-miR-365b-3p	SDR42E1	93517
hsa-miR-365b-3p	ZNF493	284443
hsa-miR-365b-3p	TRHDE	29953
hsa-miR-365b-3p	EPAS1	2034
hsa-miR-365b-3p	RIT1	6016
hsa-miR-365b-3p	IL1RAP	3556
hsa-miR-365b-3p	ANKRD17	26057
hsa-miR-365b-3p	ZNF708	7562
hsa-miR-365b-3p	UNC5D	137970
hsa-miR-365b-3p	NR1D2	9975
hsa-miR-365b-3p	RAB27A	5873
hsa-miR-365b-3p	RAB3IP	117177
hsa-miR-365b-3p	HOXA9	3205
hsa-miR-365b-3p	CYP24A1	1591
hsa-miR-365b-3p	USP48	84196
hsa-miR-365b-3p	ZNF90	7643
hsa-miR-365b-3p	FOXR2	139628
hsa-miR-365b-3p	GDF11	10220
hsa-miR-365b-3p	ARRB2	409
hsa-miR-365b-3p	LPGAT1	9926
hsa-miR-365b-3p	ZNF619	285267
hsa-miR-365b-3p	SHC1	6464
hsa-miR-365b-3p	ATG2B	55102
hsa-miR-365b-3p	KCNN3	3782
hsa-miR-365b-3p	EHF	26298
hsa-miR-365b-3p	DCUN1D5	84259
hsa-miR-365b-3p	ZNF99	7652
hsa-miR-365b-3p	POLDIP3	84271
hsa-miR-365b-3p	ALG10B	144245
hsa-miR-365b-3p	FAM3C	10447
hsa-miR-365b-3p	DCDC2	51473
hsa-miR-365b-3p	CHIC1	53344
hsa-miR-365b-3p	PRPF40A	55660
hsa-miR-365b-3p	KCNA7	3743
hsa-miR-365b-3p	SLC16A2	6567
hsa-miR-365b-3p	NEK2	4751
hsa-miR-365b-3p	SESTD1	91404
hsa-miR-365b-3p	ZNF714	148206
hsa-miR-365b-3p	RAPGEF4	11069
hsa-miR-365b-3p	PRDM1	639
hsa-miR-365b-3p	ZNF680	340252
hsa-miR-365b-3p	SGTB	54557
hsa-miR-365b-3p	KLB	152831
hsa-miR-365b-3p	REV3L	5980
hsa-miR-365b-3p	NAA38	51691
hsa-miR-365b-3p	CELF1	10658
hsa-miR-365b-3p	WDR37	22884
hsa-miR-365b-3p	ZBTB41	360023
hsa-miR-365b-3p	ENTPD7	57089
hsa-miR-365b-3p	MTR	4548
hsa-miR-365b-3p	FAM91A1	157769
hsa-miR-365b-3p	USP22	23326
hsa-miR-365b-3p	RBM11	54033
hsa-miR-376c-3p	DDHD1	80821
hsa-miR-376c-3p	CEACAM1	634
hsa-miR-376c-3p	INPP4A	3631
hsa-miR-376c-3p	ZNF33A	7581
hsa-miR-376c-3p	CNTN5	53942
hsa-miR-376c-3p	PDGFC	56034
hsa-miR-376c-3p	TMTC2	160335
hsa-miR-376c-3p	CREM	1390
hsa-miR-376c-3p	PPP2R2A	5520
hsa-miR-376c-3p	NFAT5	10725
hsa-miR-376c-3p	SUV39H2	79723
hsa-miR-376c-3p	SLC7A2	6542
hsa-miR-376c-3p	ACYP2	98
hsa-miR-376c-3p	ZMYM2	7750
hsa-miR-376c-3p	OMA1	115209
hsa-miR-376c-3p	ENTPD1	953
hsa-miR-376c-3p	MEIS2	4212
hsa-miR-376c-3p	RNF103	7844
hsa-miR-376c-3p	SOX6	55553
hsa-miR-376c-3p	EIF4E	1977
hsa-miR-376c-3p	TMEM132C	92293
hsa-miR-376c-3p	FAM102B	284611
hsa-miR-376c-3p	DSC3	1825
hsa-miR-376c-3p	RNF4	6047
hsa-miR-376c-3p	SYNM	23336
hsa-miR-376c-3p	PHLDA2	7262
hsa-miR-376c-3p	TFCP2L1	29842
hsa-miR-376c-3p	KIF26A	26153
hsa-miR-376c-3p	PPARGC1B	133522
hsa-miR-376c-3p	OPCML	4978
hsa-miR-376c-3p	HDAC9	9734
hsa-miR-376c-3p	PCDHB16	57717
hsa-miR-376c-3p	PGM2L1	283209
hsa-miR-376c-3p	PTGES3L	100885848
hsa-miR-376c-3p	GRIN2A	2903
hsa-miR-376c-3p	TEK	7010
hsa-miR-376c-3p	OR2C3	81472
hsa-miR-376c-3p	ZNF146	7705
hsa-miR-376c-3p	GNG2	54331
hsa-miR-376c-3p	CXCL16	58191
hsa-miR-376c-3p	IFNLR1	163702
hsa-miR-376c-3p	CSF2RA	1438
hsa-miR-376c-3p	PRNP	5621
hsa-miR-376c-3p	SLC13A1	6561
hsa-miR-376c-3p	ADRBK2	157
hsa-miR-376c-3p	LRRC8B	23507
hsa-miR-376c-3p	CGGBP1	8545
hsa-miR-376c-3p	DDIT4L	115265
hsa-miR-376c-3p	ENPEP	2028
hsa-miR-376c-3p	DACH2	117154
hsa-miR-376c-3p	FAM200B	285550
hsa-miR-376c-3p	UGT2B15	7366
hsa-miR-376c-3p	PHF20L1	51105
hsa-miR-376c-3p	PHF20	51230
hsa-miR-376c-3p	JMY	133746
hsa-miR-376c-3p	PDCL	5082
hsa-miR-376c-3p	MFAP3L	9848
hsa-miR-376c-3p	PAPD5	64282
hsa-miR-376c-3p	PAFAH1B1	5048
hsa-miR-376c-3p	XKR6	286046
hsa-miR-376c-3p	TEP1	7011
[truncated: 2,456 more rows]

## Sheet:  Green Yellow
miRNA	Target Gene	EntrezID
[truncated: 1,879 more rows]

[truncated: 3 more sheets:  Salmon,  Midnight Blue,  Light Cyan]
