# Supplementary material for: Network-based analysis implies critical roles of microRNAs in the long-term cellular responses to gold nanoparticles
Source: Royal Society of Chemistry journal article supplement (doi:10.1039/d0nr04701e), 2020-01-01
Supplement: d0nr04701e4.xlsx [file d0nr04701e4.xlsx]

## Sheet: miRNA-mRNA inversely correlated
Turquoise		Blue			Yellow			Green			Red			Pink			Magenta			Purple			Green Yellow		Salmon			Midnight Blue		Light Cyan
miRNA ID	matched mRNA	miRNA ID	matched miRNA target (mRNA)	Comparison	miRNA ID	matched miRNA target (mRNA)	Comparison	miRNA ID	matched miRNA target (mRNA)	Comparison	miRNA ID	matched miRNA target (mRNA)	Comparison	miRNA ID	matched miRNA target (mRNA)	Comparison	miRNA ID	matched miRNA target (mRNA)	Comparison	miRNA ID	matched miRNA target (mRNA)	Comparison	miRNA ID	matched miRNA target (mRNA)	miRNA ID	matched miRNA target (mRNA)	Comparison	miRNA ID	matched miRNA target (mRNA)	miRNA ID	matched miRNA target (mRNA)	Comparison
_	_	hsa-miR-125a-5p	TP53	CTRL x Citrate Non-Chronic/ CTRL x PAA Rods Chronic	hsa-miR-10b-5p	TP53	CTRL x PAA Rods Non-Chronic	hsa-miR-126-3p	VEGFA	PEG Chronic x Non-Chronic	hsa-let-7a-5p	EDN1	CTRL x PAA Spheres Chronic	hsa-miR-1185-2-3p	ATG12	PEG Rods Chronic x Non-Chronic	hsa-miR-155-5p	EDN1	CTRL x PAA Spheres Chronic/ PEG Rods Chronic x Non-Chronic	hsa-miR-129-2-3p	BNIP3L	CTRL x PAA Rods Chronic	_	_	hsa-miR-30b-5p	NFAT5	CTRL x PAA Spheres Chronic	_	_	hsa-miR-146a-5p	TLR4	CTRL x Citrate Non-Chronic
		hsa-miR-125b-5p	TP53	CTRL x Citrate Non-Chronic/ CTRL x PAA Rods Chronic	hsa-miR-146b-5p	TLR4	PEG Chronic x Non-Chronic	hsa-miR-16-5p	VEGFA	PEG Chronic x Non-Chronic	hsa-let-7a-5p	CDKN1A	CTRL x Citrate Non-Chronic	hsa-miR-1185-2-3p	TLR4	PEG Rods Chronic x Non-Chronic	hsa-miR-320a	AQP1	PAA Spheres Chronic x Non-Chronic/ PEG Rods Chronic x Non-Chronic	hsa-miR-129-2-3p	NFAT5	CTRL x Citrate Non-Chronic/CTRL x PAA Rods Chronic			hsa-miR-30b-5p	ATG5	PAA Spheres Chronic x Non-Chronic			hsa-miR-146a-5p	NFAT5	CTRL x Citrate Non-Chronic
		hsa-miR-1260a	DNAJC3	CTRL x PAA Rods Chronic	hsa-miR-181a-5p	MCL1	CTRL x PAA Rods Chronic	hsa-miR-22-3p	SLC2A1	PEG Chronic x Non-Chronic	hsa-let-7d-5p	EDN1	CTRL x PAA Spheres Chronic	hsa-miR-148b-3p	HSP90AA1	PEG Rods Chronic x Non-Chronic				hsa-miR-376c-3p	NFAT5	CTRL x Citrate Non-Chronic/CTRL x PAA Rods Chronic								hsa-miR-146a-5p	IL6	PEG Rods Chronic x Non-Chronic
		hsa-miR-1260b	DNAJC3	CTRL x PAA Rods Chronic	hsa-miR-181a-5p	TLR4	PEG Chronic x Non-Chronic	hsa-miR-339-3p	MCL1	PEG Chronic x Non-Chronic	hsa-let-7e-5p	EDN1	CTRL x PAA Spheres Chronic	hsa-miR-532-5p	TXNRD1	PEG Rods Chronic x Non-Chronic				hsa-miR-376c-3p	ATG12	PEG Chronic x Non-Chronic
		hsa-miR-151a-5p	TP53	CTRL x Citrate Non-Chronic/ CTRL x PAA Rods Chronic	hsa-miR-181b-5p	MCL1	CTRL x PAA Rods Chronic	hsa-miR-345-5p	DNAJC3	PEG Chronic x Non-Chronic	hsa-let-7f-5p	EDN1	CTRL x PAA Spheres Chronic							hsa-miR-495-3p	TLR4	CTRL x Citrate Non-Chronic/CTRL x PEG Rods Non-Chronic/ PEG Rods Chronic x Non-Chronic
		hsa-miR-16-2-3p	DNAJC3	CTRL x PAA Rods Chronic	hsa-miR-181b-5p	TLR4	PEG Chronic x Non-Chronic				hsa-miR-132-3p	CDKN1A	CTRL x Citrate Non-Chronic							hsa-miR-495-3p	CHEK1	CTRL x PAA Rods Non-Chronic
		hsa-miR-16-2-3p	MRE11A	CTRL x PAA Rods Chronic	hsa-miR-224-5p	CHEK1	CTRL x PAA Rods Non-Chronic				hsa-miR-196a-5p	CDKN1A	CTRL x Citrate Non-Chronic							hsa-miR-495-3p	NFAT5	CTRL x Citrate Non-Chronic/CTRL x PAA Rods Chronic
		hsa-miR-23b-3p	SLC2A1	CTRL x PAA Rods Chronic	hsa-miR-26b-5p	TLR4	PEG Chronic x Non-Chronic													hsa-miR-495-3p	MRE11A	CTRL x PAA Rods Chronic/ CTRL x PEG Rods Non-Chronic
		hsa-miR-23b-3p	TXNRD1	CTRL x Citrate Non-Chronic/ CTRL x PAA Rods Chronic	hsa-miR-30d-5p	TP53	CTRL x PAA Rods Non-Chronic													hsa-miR-495-3p	EDN1	PEG Rods Chronic x Non-Chronic
		hsa-miR-30c-5p	NFAT5	CTRL x Citrate Non-Chronic/ CTRL x PAA Rods Chronic	hsa-miR-30d-5p	TNFRSF10B	PEG Chronic x Non-Chronic													hsa-miR-495-3p	CCL2	CTRL x PAA Rods Chronic
		hsa-miR-30c-5p	TP53	CTRL x Citrate Non-Chronic/ CTRL x PAA Rods Chronic	hsa-miR-369-3p	TLR4	PEG Chronic x Non-Chronic													hsa-miR-495-3p	DNAJC3	CTRL x PAA Rods Chronic
		hsa-miR-30c-5p	BNIP3L	CTRL x PAA Rods Chronic	hsa-miR-452-5p	VEGFA	CTRL x PAA Rods Chronic													hsa-miR-495-3p	EDN1	PEG Rods Chronic x Non-Chronic
		hsa-miR-328-3p	SLC2A1	CTRL x PAA Rods Chronic	hsa-miR-452-5p	ATF6	PEG Chronic x Non-Chronic													hsa-miR-655-3p	ATG12	PEG Rods Chronic x Non-Chronic
		hsa-miR-339-5p	ATG7	CTRL x Citrate Non-Chronic	hsa-miR-98-5p	RAD9A	CTRL x PAA Rods Non-Chronic													hsa-miR-655-3p	NFAT5	CTRL x Citrate Non-Chronic/CTRL x PAA Rods Chronic
		hsa-miR-34b-3p	BNIP3L	CTRL x PAA Rods Chronic	hsa-miR-98-5p	EDN1	PEG Chronic x Non-Chronic													hsa-miR-655-3p	TLR4	CTRL x Citrate Non-Chronic/CTRL x PEG Rods Non-Chronic/ PEG Rods Chronic x Non-Chronic
		hsa-miR-491-5p	TP53	CTRL x Citrate Non-Chronic/ CTRL x PAA Rods Chronic
		hsa-miR-491-5p	SLC2A1	CTRL x PAA Rods Chronic
		hsa-miR-491-5p	TXNRD1	CTRL x Citrate Non-Chronic/ CTRL x PAA Rods Chronic
