# Supplementary material for: Network-based analysis implies critical roles of microRNAs in the long-term cellular responses to gold nanoparticles
Source: Royal Society of Chemistry journal article supplement (doi:10.1039/d0nr04701e), 2020-01-01
Supplement: d0nr04701e5.xlsx [file d0nr04701e5.xlsx]

## Sheet: Turquoise
REACTOME 2016- Biological Pathways (27 enriched pathways)
Term	Overlap	Adjusted P value	Genes
Post-translational protein modification_Homo sapiens_R-HSA-597592	17/521	0.0344493	NDC1;GALNT7;ST6GAL2;TUSC3;ST8SIA1;GFPT1;EIF5A2;ST8SIA3;C1GALT1;MITF;PHC3;NAPG;ADAMTS5;TPR;SP3;ST8SIA4;ALG10B
Biosynthesis of the N-glycan precursor (dolichol lipid-linked oligosaccharide, LLO) and transfer to a nascent protein_Homo sapiens_R-HSA-446193	6/78	0.044607	ST6GAL2;ST8SIA1;GFPT1;ST8SIA3;ST8SIA4;ALG10B
Diseases of signal transduction_Homo sapiens_R-HSA-5663202	11/288	0.044607	SMAD2;KITLG;NRAS;CPSF6;CREB1;NOTCH1;ERBB4;STAT3;GAB1;HDAC9;LRP6
Disease_Homo sapiens_R-HSA-1643685	19/725	0.044607	NDC1;SMAD2;CCNT2;NOTCH1;CPSF6;STAT3;C1GALT1;GAB1;GTF2H1;HDAC9;LRP6;ADAMTS5;NRAS;KITLG;CREB1;ERBB4;TPR;CHMP2B;TLR4
GAB1 signalosome_Homo sapiens_R-HSA-180292	7/125	0.044607	KITLG;CREB1;ERBB4;GAB1;PTEN;PAG1;TNRC6B
Sialic acid metabolism_Homo sapiens_R-HSA-4085001	4/33	0.044607	ST6GAL2;ST8SIA1;ST8SIA3;ST8SIA4
Synthesis of substrates in N-glycan biosythesis_Homo sapiens_R-HSA-446219	5/63	0.0535187	ST6GAL2;ST8SIA1;GFPT1;ST8SIA3;ST8SIA4
Signaling by FGFR1 in disease_Homo sapiens_R-HSA-5655302	4/38	0.0578582	NRAS;CPSF6;STAT3;GAB1
Transcriptional activity of SMAD2/SMAD3:SMAD4 heterotrimer_Homo sapiens_R-HSA-2173793	4/44	0.0780459	SMAD2;PPM1A;CCNT2;UBE2D1
Generic Transcription Pathway_Homo sapiens_R-HSA-212436	19/812	0.0780459	SMAD2;PRKAA1;PRKAA2;CCNT2;NOTCH1;PTEN;UBE2D1;RORA;GTF2H1;NR3C1;NR2C2;NR4A2;PPM1A;ZNF704;JMY;ZNF678;TEAD1;E2F7;TNRC6B
Downregulation of SMAD2/3:SMAD4 transcriptional activity_Homo sapiens_R-HSA-2173795	3/23	0.0780459	SMAD2;PPM1A;UBE2D1
PI-3K cascade:FGFR1_Homo sapiens_R-HSA-5654689	6/122	0.0780459	KITLG;CREB1;ERBB4;GAB1;PTEN;TNRC6B
PI-3K cascade:FGFR2_Homo sapiens_R-HSA-5654695	6/122	0.0780459	KITLG;CREB1;ERBB4;GAB1;PTEN;TNRC6B
PI-3K cascade:FGFR3_Homo sapiens_R-HSA-5654710	6/122	0.0780459	KITLG;CREB1;ERBB4;GAB1;PTEN;TNRC6B
PI-3K cascade:FGFR4_Homo sapiens_R-HSA-5654720	6/122	0.0780459	KITLG;CREB1;ERBB4;GAB1;PTEN;TNRC6B
PI3K events in ERBB4 signaling_Homo sapiens_R-HSA-1250342	6/122	0.0780459	KITLG;CREB1;ERBB4;GAB1;PTEN;TNRC6B
PIP3 activates AKT signaling_Homo sapiens_R-HSA-1257604	6/122	0.0780459	KITLG;CREB1;ERBB4;GAB1;PTEN;TNRC6B
Nuclear Receptor transcription pathway_Homo sapiens_R-HSA-383280	4/51	0.0780459	NR4A2;RORA;NR2C2;NR3C1
PI3K/AKT activation_Homo sapiens_R-HSA-198203	6/125	0.0795624	KITLG;CREB1;ERBB4;GAB1;PTEN;TNRC6B
Downregulation of ERBB4 signaling_Homo sapiens_R-HSA-1253288	2/8	0.0957999	ERBB4;NEDD4
Signaling by ERBB4_Homo sapiens_R-HSA-1236394	10/330	0.0957999	KITLG;NRAS;CREB1;SHC3;ERBB4;NEDD4;GAB1;PTEN;PRLR;TNRC6B
Energy dependent regulation of mTOR by LKB1-AMPK_Homo sapiens_R-HSA-380972	3/28	0.0957999	PPM1A;PRKAA1;PRKAA2
SUMO E3 ligases SUMOylate target proteins_Homo sapiens_R-HSA-3108232	5/96	0.098502	NDC1;SP3;TPR;MITF;PHC3
SHC-related events triggered by IGF1R_Homo sapiens_R-HSA-2428933	2/9	0.098502	NRAS;IGF1
IGF1R signaling cascade_Homo sapiens_R-HSA-2428924	9/288	0.098502	PPM1A;PRKAA1;KITLG;NRAS;PRKAA2;SHC3;ERBB4;GAB1;IGF1
IRS-related events triggered by IGF1R_Homo sapiens_R-HSA-2428928	9/288	0.098502	PPM1A;PRKAA1;KITLG;NRAS;PRKAA2;SHC3;ERBB4;GAB1;IGF1
Signaling by Type 1 Insulin-like Growth Factor 1 Receptor (IGF1R)_Homo sapiens_R-HSA-2404192	9/288	0.098502	PPM1A;PRKAA1;KITLG;NRAS;PRKAA2;SHC3;ERBB4;GAB1;IGF1

## Sheet:  Blue
REACTOME 2016- Biological Pathways (54 enriched pathways)
Term	Overlap	Adjusted P value	Genes
Activation of BH3-only proteins_Homo sapiens_R-HSA-114452	5/29	8.72491e-05	BCL2;BMF;YWHAZ;TP53;YWHAG
Intrinsic Pathway for Apoptosis_Homo sapiens_R-HSA-109606	5/42	0.000297783	BCL2;BMF;YWHAZ;TP53;YWHAG
Oncogene Induced Senescence_Homo sapiens_R-HSA-2559585	4/32	0.00193381	CDK6;TP53;ETS1;TNRC6B
Activation of BAD and translocation to mitochondria_Homo sapiens_R-HSA-111447	3/15	0.00428145	BCL2;YWHAZ;YWHAG
Cellular Senescence_Homo sapiens_R-HSA-2559583	6/161	0.00741296	MAPK9;CDK6;UBN1;TP53;ETS1;TNRC6B
Apoptosis_Homo sapiens_R-HSA-109581	6/163	0.00741296	BCL2;BMF;CFLAR;TP53;YWHAZ;YWHAG
Programmed Cell Death_Homo sapiens_R-HSA-5357801	6/166	0.00741296	BCL2;BMF;CFLAR;TP53;YWHAZ;YWHAG
BH3-only proteins associate with and inactivate anti-apoptotic BCL-2 members_Homo sapiens_R-HSA-111453	2/8	0.0287044	BCL2;BMF
TP53 Regulates Metabolic Genes_Homo sapiens_R-HSA-5628897	4/84	0.0287044	TP53;YWHAZ;YWHAG;TNRC6B
Oxidative Stress Induced Senescence_Homo sapiens_R-HSA-2559580	4/91	0.034025	MAPK9;CDK6;TP53;TNRC6B
GP1b-IX-V activation signalling_Homo sapiens_R-HSA-430116	2/10	0.034025	PIK3R1;YWHAZ
RHO GTPase Effectors_Homo sapiens_R-HSA-195258	6/255	0.0386592	PPP1CB;YWHAZ;NSL1;SCAI;YWHAG;PAFAH1B1
Cell Cycle_Homo sapiens_R-HSA-1640170	9/566	0.0386592	PPP1CB;CDK6;CCND2;TK2;TP53;YWHAZ;NSL1;YWHAG;PAFAH1B1
Chk1/Chk2(Cds1) mediated inactivation of Cyclin B:Cdk1 complex_Homo sapiens_R-HSA-75035	2/12	0.0386592	YWHAZ;YWHAG
Cell Cycle, Mitotic_Homo sapiens_R-HSA-69278	8/462	0.0386592	PPP1CB;CDK6;CCND2;TK2;TP53;NSL1;YWHAG;PAFAH1B1
Cellular responses to stress_Homo sapiens_R-HSA-2262752	7/367	0.0386592	MAPK9;CDK6;UBN1;CUL2;TP53;ETS1;TNRC6B
Constitutive Signaling by EGFRvIII_Homo sapiens_R-HSA-5637810	2/15	0.0386592	PIK3R1;EGFR
Signaling by EGFRvIII in Cancer_Homo sapiens_R-HSA-5637812	2/15	0.0386592	PIK3R1;EGFR
PI3K events in ERBB2 signaling_Homo sapiens_R-HSA-1963642	2/16	0.0386592	PIK3R1;EGFR
PI-3K cascade:FGFR1_Homo sapiens_R-HSA-5654689	4/122	0.0386592	PIK3R1;FOXO3;EGFR;TNRC6B
PI-3K cascade:FGFR2_Homo sapiens_R-HSA-5654695	4/122	0.0386592	PIK3R1;FOXO3;EGFR;TNRC6B
PI-3K cascade:FGFR3_Homo sapiens_R-HSA-5654710	4/122	0.0386592	PIK3R1;FOXO3;EGFR;TNRC6B
PI-3K cascade:FGFR4_Homo sapiens_R-HSA-5654720	4/122	0.0386592	PIK3R1;FOXO3;EGFR;TNRC6B
PI3K events in ERBB4 signaling_Homo sapiens_R-HSA-1250342	4/122	0.0386592	PIK3R1;FOXO3;EGFR;TNRC6B
PIP3 activates AKT signaling_Homo sapiens_R-HSA-1257604	4/122	0.0386592	PIK3R1;FOXO3;EGFR;TNRC6B
RHO GTPases activate PKNs_Homo sapiens_R-HSA-5625740	3/60	0.0386592	PPP1CB;YWHAZ;YWHAG
Formation of Senescence-Associated Heterochromatin Foci (SAHF)_Homo sapiens_R-HSA-2559584	2/17	0.0386592	UBN1;TP53
GAB1 signalosome_Homo sapiens_R-HSA-180292	4/125	0.0386592	PIK3R1;FOXO3;EGFR;TNRC6B
PI3K/AKT activation_Homo sapiens_R-HSA-198203	4/125	0.0386592	PIK3R1;FOXO3;EGFR;TNRC6B
Constitutive Signaling by Ligand-Responsive EGFR Cancer Variants_Homo sapiens_R-HSA-1236382	2/19	0.041928	PIK3R1;EGFR
Signaling by EGFR in Cancer_Homo sapiens_R-HSA-1643713	2/19	0.041928	PIK3R1;EGFR
Signaling by Ligand-Responsive EGFR Variants in Cancer_Homo sapiens_R-HSA-5637815	2/19	0.041928	PIK3R1;EGFR
Signaling by NODAL_Homo sapiens_R-HSA-1181150	2/19	0.041928	SMAD4;FOXO3
Membrane Trafficking_Homo sapiens_R-HSA-199991	7/420	0.0419754	ARRB1;NAA38;TMED7;YWHAZ;PAFAH1B2;YWHAG;PAFAH1B1
Signaling by ERBB4_Homo sapiens_R-HSA-1236394	6/330	0.0518786	ARRB1;PIK3R1;FOXO3;PRLR;EGFR;TNRC6B
Generic Transcription Pathway_Homo sapiens_R-HSA-212436	10/812	0.0520212	SMAD4;ZNF704;ZNF208;RORA;PRDM1;TP53;YWHAZ;YWHAG;HIPK2;TNRC6B
G2/M DNA damage checkpoint_Homo sapiens_R-HSA-69473	3/78	0.0616059	TP53;YWHAZ;YWHAG
Transcriptional Regulation by TP53_Homo sapiens_R-HSA-3700989	6/348	0.0616059	PRDM1;TP53;YWHAZ;YWHAG;HIPK2;TNRC6B
Role of LAT2/NTAL/LAB on calcium mobilization_Homo sapiens_R-HSA-2730905	4/162	0.0719195	PIK3R1;FOXO3;EGFR;TNRC6B
Signaling by Rho GTPases_Homo sapiens_R-HSA-194315	6/367	0.0738662	PPP1CB;YWHAZ;NSL1;SCAI;YWHAG;PAFAH1B1
PI3K/AKT Signaling in Cancer_Homo sapiens_R-HSA-2219528	3/86	0.0738662	PIK3R1;FOXO3;EGFR
Regulation of PLK1 Activity at G2/M Transition_Homo sapiens_R-HSA-2565942	3/87	0.0741038	PPP1CB;YWHAG;PAFAH1B1
COPI-independent Golgi-to-ER retrograde traffic_Homo sapiens_R-HSA-6811436	2/29	0.0741038	PAFAH1B2;PAFAH1B1
Vesicle-mediated transport_Homo sapiens_R-HSA-5653656	7/492	0.0754259	ARRB1;NAA38;TMED7;YWHAZ;PAFAH1B2;YWHAG;PAFAH1B1
Gene Expression_Homo sapiens_R-HSA-74160	15/1631	0.076458	SMAD4;POU2F1;SSR3;RORA;PRDM1;YWHAZ;A1CF;HIPK2;ZNF704;TRMT5;ZNF208;TAF8;TP53;YWHAG;TNRC6B
G2/M Transition_Homo sapiens_R-HSA-69275	4/173	0.076458	PPP1CB;TP53;YWHAG;PAFAH1B1
Mitotic G2-G2/M phases_Homo sapiens_R-HSA-453274	4/175	0.0778318	PPP1CB;TP53;YWHAG;PAFAH1B1
TGF-beta receptor signaling activates SMADs_Homo sapiens_R-HSA-2173789	2/32	0.0803638	PPP1CB;SMAD4
Intra-Golgi and retrograde Golgi-to-ER traffic_Homo sapiens_R-HSA-6811442	4/179	0.0806346	NAA38;TMED7;PAFAH1B2;PAFAH1B1
Fc epsilon receptor (FCERI) signaling_Homo sapiens_R-HSA-2454202	6/395	0.0845347	MAPK9;ARRB1;PIK3R1;FOXO3;EGFR;TNRC6B
Regulation of TP53 Expression and Degradation_Homo sapiens_R-HSA-6806003	2/36	0.0949103	PRDM1;TP53
Downstream signaling events of B Cell Receptor (BCR)_Homo sapiens_R-HSA-1168372	4/192	0.0962924	PIK3R1;FOXO3;EGFR;TNRC6B
Cyclin D associated events in G1_Homo sapiens_R-HSA-69231	2/38	0.0994189	CDK6;CCND2
G1 Phase_Homo sapiens_R-HSA-69236	2/38	0.0994189	CDK6;CCND2

## Sheet:  Yellow
REACTOME 2016- Biological Pathways (147 enriched pathways)
Term	Overlap	Adjusted P value	Genes
Signaling by ERBB4_Homo sapiens_R-HSA-1236394	13/330	0.000541092	PDGFRA;CAMK2D;PTEN;PRLR;EREG;GRIN2A;NRAS;CREB1;ERBB4;MDM2;KRAS;SKP1;TNRC6B
Downstream signaling events of B Cell Receptor (BCR)_Homo sapiens_R-HSA-1168372	10/192	0.000541092	PDGFRA;NRAS;CREB1;ERBB4;MDM2;PTEN;KRAS;EREG;SKP1;TNRC6B
GAB1 signalosome_Homo sapiens_R-HSA-180292	8/125	0.00070163	PDGFRA;CREB1;ERBB4;MDM2;PTEN;PAG1;EREG;TNRC6B
GRB2 events in ERBB2 signaling_Homo sapiens_R-HSA-1963640	4/16	0.00070163	NRAS;ERBB4;KRAS;EREG
Signaling by SCF-KIT_Homo sapiens_R-HSA-1433557	12/325	0.000725108	PDGFRA;GRIN2A;NRAS;CAMK2D;CREB1;ERBB4;GRB10;MDM2;PTEN;KRAS;EREG;TNRC6B
SHC1 events in ERBB2 signaling_Homo sapiens_R-HSA-1250196	4/18	0.000725108	NRAS;ERBB4;KRAS;EREG
Fc epsilon receptor (FCERI) signaling_Homo sapiens_R-HSA-2454202	13/395	0.000725108	PDGFRA;CAMK2D;PTEN;EREG;PPP3R1;GRIN2A;NRAS;CREB1;ERBB4;MDM2;KRAS;TNRC6B;SKP1
Signaling by the B Cell Receptor (BCR)_Homo sapiens_R-HSA-983705	10/233	0.000725108	PDGFRA;NRAS;CREB1;ERBB4;MDM2;PTEN;KRAS;EREG;SKP1;TNRC6B
Diseases of signal transduction_Homo sapiens_R-HSA-5663202	11/288	0.000725108	PDGFRA;NRAS;SMAD4;BAG4;CREB1;ERBB4;SEL1L;MDM2;KRAS;EREG;SKP1
Signaling by EGFR_Homo sapiens_R-HSA-177929	12/355	0.000885411	PDGFRA;GRIN2A;NRAS;CAMK2D;CREB1;ERBB4;MDM2;PTEN;KRAS;PAG1;EREG;TNRC6B
SHC-related events triggered by IGF1R_Homo sapiens_R-HSA-2428933	3/9	0.00103241	NRAS;KRAS;IGF1R
PI-3K cascade:FGFR1_Homo sapiens_R-HSA-5654689	7/122	0.00103241	PDGFRA;CREB1;ERBB4;MDM2;PTEN;EREG;TNRC6B
PI-3K cascade:FGFR2_Homo sapiens_R-HSA-5654695	7/122	0.00103241	PDGFRA;CREB1;ERBB4;MDM2;PTEN;EREG;TNRC6B
PI-3K cascade:FGFR3_Homo sapiens_R-HSA-5654710	7/122	0.00103241	PDGFRA;CREB1;ERBB4;MDM2;PTEN;EREG;TNRC6B
PI-3K cascade:FGFR4_Homo sapiens_R-HSA-5654720	7/122	0.00103241	PDGFRA;CREB1;ERBB4;MDM2;PTEN;EREG;TNRC6B
PI3K events in ERBB4 signaling_Homo sapiens_R-HSA-1250342	7/122	0.00103241	PDGFRA;CREB1;ERBB4;MDM2;PTEN;EREG;TNRC6B
PIP3 activates AKT signaling_Homo sapiens_R-HSA-1257604	7/122	0.00103241	PDGFRA;CREB1;ERBB4;MDM2;PTEN;EREG;TNRC6B
Downstream signaling of activated FGFR2_Homo sapiens_R-HSA-5654696	11/329	0.00103241	PDGFRA;GRIN2A;NRAS;CAMK2D;CREB1;ERBB4;MDM2;PTEN;KRAS;EREG;TNRC6B
Downstream signaling of activated FGFR3_Homo sapiens_R-HSA-5654708	11/329	0.00103241	PDGFRA;GRIN2A;NRAS;CAMK2D;CREB1;ERBB4;MDM2;PTEN;KRAS;EREG;TNRC6B
Downstream signaling of activated FGFR4_Homo sapiens_R-HSA-5654716	11/329	0.00103241	PDGFRA;GRIN2A;NRAS;CAMK2D;CREB1;ERBB4;MDM2;PTEN;KRAS;EREG;TNRC6B
Downstream signaling of activated FGFR1_Homo sapiens_R-HSA-5654687	11/332	0.00103241	PDGFRA;GRIN2A;NRAS;CAMK2D;CREB1;ERBB4;MDM2;PTEN;KRAS;EREG;TNRC6B
Signaling by FGFR4_Homo sapiens_R-HSA-5654743	11/332	0.00103241	PDGFRA;GRIN2A;NRAS;CAMK2D;CREB1;ERBB4;MDM2;PTEN;KRAS;EREG;TNRC6B
PI3K/AKT activation_Homo sapiens_R-HSA-198203	7/125	0.00103241	PDGFRA;CREB1;ERBB4;MDM2;PTEN;EREG;TNRC6B
Signaling by FGFR3_Homo sapiens_R-HSA-5654741	11/333	0.00103241	PDGFRA;GRIN2A;NRAS;CAMK2D;CREB1;ERBB4;MDM2;PTEN;KRAS;EREG;TNRC6B
Signaling by FGFR1_Homo sapiens_R-HSA-5654736	11/336	0.00107461	PDGFRA;GRIN2A;NRAS;CAMK2D;CREB1;ERBB4;MDM2;PTEN;KRAS;EREG;TNRC6B
Downstream signal transduction_Homo sapiens_R-HSA-186763	11/341	0.00118004	PDGFRA;GRIN2A;NRAS;CAMK2D;CREB1;ERBB4;MDM2;PTEN;KRAS;EREG;TNRC6B
DAP12 signaling_Homo sapiens_R-HSA-2424491	11/344	0.00121184	PDGFRA;GRIN2A;NRAS;CAMK2D;CREB1;ERBB4;MDM2;PTEN;KRAS;EREG;TNRC6B
Activation of BH3-only proteins_Homo sapiens_R-HSA-114452	4/29	0.00121184	PPP3R1;BCL2;PMAIP1;TP63
DAP12 interactions_Homo sapiens_R-HSA-2172127	11/359	0.00164421	PDGFRA;GRIN2A;NRAS;CAMK2D;CREB1;ERBB4;MDM2;PTEN;KRAS;EREG;TNRC6B
Developmental Biology_Homo sapiens_R-HSA-1266738	17/786	0.00164421	EPHA5;PDGFRA;SMAD4;CAMK2D;ADAM22;PAX6;EREG;GRIN2A;NRAS;CREB1;ACVR1C;ERBB4;DPYSL2;SCN9A;ST8SIA4;KRAS;EZH2
Signaling by FGFR2_Homo sapiens_R-HSA-5654738	11/361	0.00164421	PDGFRA;GRIN2A;NRAS;CAMK2D;CREB1;ERBB4;MDM2;PTEN;KRAS;EREG;TNRC6B
Signaling by PDGF_Homo sapiens_R-HSA-186797	11/364	0.00171353	PDGFRA;GRIN2A;NRAS;CAMK2D;CREB1;ERBB4;MDM2;PTEN;KRAS;EREG;TNRC6B
Signaling by FGFR_Homo sapiens_R-HSA-190236	11/366	0.00174379	PDGFRA;GRIN2A;NRAS;CAMK2D;CREB1;ERBB4;MDM2;PTEN;KRAS;EREG;TNRC6B
Circadian Clock_Homo sapiens_R-HSA-400253	5/63	0.00176784	CREB1;FBXL3;RORA;NR3C1;SKP1
Innate Immune System_Homo sapiens_R-HSA-168249	17/807	0.00193248	PDGFRA;CAMK2D;PTEN;EREG;GRIN2A;NRAS;PPP3R1;CREB1;ERBB4;MDM2;BCL2;POLR3G;KRAS;MASP1;TLR4;TNRC6B;SKP1
NGF signalling via TRKA from the plasma membrane_Homo sapiens_R-HSA-187037	11/374	0.00193248	PDGFRA;GRIN2A;NRAS;CAMK2D;CREB1;ERBB4;MDM2;PTEN;KRAS;EREG;TNRC6B
Signaling by PTK6_Homo sapiens_R-HSA-8848021	5/67	0.00217868	NRAS;ERBB4;KRAS;NR3C1;EREG
CREB phosphorylation through the activation of CaMKII_Homo sapiens_R-HSA-442729	3/15	0.00250483	CAMK2D;GRIN2A;CREB1
NCAM signaling for neurite out-growth_Homo sapiens_R-HSA-375165	9/266	0.0026384	PDGFRA;GRIN2A;NRAS;CAMK2D;CREB1;ERBB4;ST8SIA4;KRAS;EREG
Nuclear signaling by ERBB4_Homo sapiens_R-HSA-1251985	4/39	0.00277041	ERBB4;PRLR;EREG;SKP1
Role of LAT2/NTAL/LAB on calcium mobilization_Homo sapiens_R-HSA-2730905	7/162	0.00301926	PDGFRA;CREB1;ERBB4;MDM2;PTEN;EREG;TNRC6B
Intrinsic Pathway for Apoptosis_Homo sapiens_R-HSA-109606	4/42	0.00352803	PPP3R1;BCL2;PMAIP1;TP63
Signaling by ERBB2_Homo sapiens_R-HSA-1227986	4/45	0.00450731	NRAS;ERBB4;KRAS;EREG
PI3K/AKT Signaling in Cancer_Homo sapiens_R-HSA-2219528	5/86	0.00589008	PDGFRA;CREB1;ERBB4;MDM2;EREG
Axon guidance_Homo sapiens_R-HSA-422475	12/515	0.00642782	EPHA5;PDGFRA;GRIN2A;NRAS;CAMK2D;CREB1;ERBB4;DPYSL2;SCN9A;ST8SIA4;KRAS;EREG
Activation of RAS in B cells_Homo sapiens_R-HSA-1169092	2/5	0.00642782	NRAS;KRAS
Signalling by NGF_Homo sapiens_R-HSA-166520	11/450	0.00713348	PDGFRA;GRIN2A;NRAS;CAMK2D;CREB1;ERBB4;MDM2;PTEN;KRAS;TNRC6B;EREG
CREB phosphorylation through the activation of Ras_Homo sapiens_R-HSA-442742	3/27	0.0119288	CAMK2D;GRIN2A;CREB1
Transmission across Chemical Synapses_Homo sapiens_R-HSA-112315	7/211	0.0122005	GRIN2A;CAMK2D;CREB1;GABRA4;MDM2;CASK;SLC38A2
Disease_Homo sapiens_R-HSA-1643685	14/725	0.012835	PDGFRA;SMAD4;SEL1L;GTF2H5;EREG;NRAS;BAG4;CREB1;PPP1R3C;ERBB4;MDM2;KRAS;TLR4;SKP1
MAPK family signaling cascades_Homo sapiens_R-HSA-5683057	8/284	0.01495	PDGFRA;GRIN2A;NRAS;CAMK2D;ERBB4;KRAS;EREG;TNRC6B
BH3-only proteins associate with and inactivate anti-apoptotic BCL-2 members_Homo sapiens_R-HSA-111453	2/8	0.01495	BCL2;PMAIP1
Insulin receptor signalling cascade_Homo sapiens_R-HSA-74751	8/287	0.01495	PDGFRA;GRIN2A;NRAS;CAMK2D;ERBB4;GRB10;KRAS;EREG
IGF1R signaling cascade_Homo sapiens_R-HSA-2428924	8/288	0.01495	PDGFRA;GRIN2A;NRAS;CAMK2D;ERBB4;KRAS;EREG;IGF1R
IRS-related events triggered by IGF1R_Homo sapiens_R-HSA-2428928	8/288	0.01495	PDGFRA;GRIN2A;NRAS;CAMK2D;ERBB4;KRAS;EREG;IGF1R
Signaling by Type 1 Insulin-like Growth Factor 1 Receptor (IGF1R)_Homo sapiens_R-HSA-2404192	8/288	0.01495	PDGFRA;GRIN2A;NRAS;CAMK2D;ERBB4;KRAS;EREG;IGF1R
Amino acid transport across the plasma membrane_Homo sapiens_R-HSA-352230	3/31	0.0151002	SLC7A11;SLC38A2;SLC7A2
EGFR Transactivation by Gastrin_Homo sapiens_R-HSA-2179392	2/9	0.0169043	NRAS;KRAS
GRB2 events in EGFR signaling_Homo sapiens_R-HSA-179812	7/235	0.0169043	PDGFRA;GRIN2A;NRAS;CAMK2D;ERBB4;KRAS;EREG
RAF/MAP kinase cascade_Homo sapiens_R-HSA-5673001	7/235	0.0169043	PDGFRA;GRIN2A;NRAS;CAMK2D;ERBB4;KRAS;EREG
SHC1 events in EGFR signaling_Homo sapiens_R-HSA-180336	7/235	0.0169043	PDGFRA;GRIN2A;NRAS;CAMK2D;ERBB4;KRAS;EREG
SHC1 events in ERBB4 signaling_Homo sapiens_R-HSA-1250347	7/235	0.0169043	PDGFRA;GRIN2A;NRAS;CAMK2D;ERBB4;KRAS;EREG
SOS-mediated signalling_Homo sapiens_R-HSA-112412	7/235	0.0169043	PDGFRA;GRIN2A;NRAS;CAMK2D;ERBB4;KRAS;EREG
FRS-mediated FGFR1 signaling_Homo sapiens_R-HSA-5654693	7/236	0.0169043	PDGFRA;GRIN2A;NRAS;CAMK2D;ERBB4;KRAS;EREG
FRS-mediated FGFR2 signaling_Homo sapiens_R-HSA-5654700	7/236	0.0169043	PDGFRA;GRIN2A;NRAS;CAMK2D;ERBB4;KRAS;EREG
FRS-mediated FGFR3 signaling_Homo sapiens_R-HSA-5654706	7/236	0.0169043	PDGFRA;GRIN2A;NRAS;CAMK2D;ERBB4;KRAS;EREG
FRS-mediated FGFR4 signaling_Homo sapiens_R-HSA-5654712	7/236	0.0169043	PDGFRA;GRIN2A;NRAS;CAMK2D;ERBB4;KRAS;EREG
ARMS-mediated activation_Homo sapiens_R-HSA-170984	7/239	0.0175132	PDGFRA;GRIN2A;NRAS;CAMK2D;ERBB4;KRAS;EREG
Signalling to p38 via RIT and RIN_Homo sapiens_R-HSA-187706	7/239	0.0175132	PDGFRA;GRIN2A;NRAS;CAMK2D;ERBB4;KRAS;EREG
Post NMDA receptor activation events_Homo sapiens_R-HSA-438064	3/35	0.0175132	CAMK2D;GRIN2A;CREB1
Frs2-mediated activation_Homo sapiens_R-HSA-170968	7/240	0.0175294	PDGFRA;GRIN2A;NRAS;CAMK2D;ERBB4;KRAS;EREG
MAPK1/MAPK3 signaling_Homo sapiens_R-HSA-5684996	7/241	0.0176175	PDGFRA;GRIN2A;NRAS;CAMK2D;ERBB4;KRAS;EREG
Signaling by FGFR3 fusions in cancer_Homo sapiens_R-HSA-8853334	2/10	0.0176175	NRAS;KRAS
Prolonged ERK activation events_Homo sapiens_R-HSA-169893	7/242	0.0176175	PDGFRA;GRIN2A;NRAS;CAMK2D;ERBB4;KRAS;EREG
Signaling by Leptin_Homo sapiens_R-HSA-2586552	7/243	0.0177572	PDGFRA;GRIN2A;NRAS;CAMK2D;ERBB4;KRAS;EREG
Signaling by Insulin receptor_Homo sapiens_R-HSA-74752	8/311	0.0177572	PDGFRA;GRIN2A;NRAS;CAMK2D;ERBB4;GRB10;KRAS;EREG
Interleukin receptor SHC signaling_Homo sapiens_R-HSA-912526	7/245	0.018135	PDGFRA;GRIN2A;NRAS;CAMK2D;ERBB4;KRAS;EREG
Signalling to RAS_Homo sapiens_R-HSA-167044	7/246	0.0183127	PDGFRA;GRIN2A;NRAS;CAMK2D;ERBB4;KRAS;EREG
VEGFR2 mediated cell proliferation_Homo sapiens_R-HSA-5218921	7/248	0.0189124	PDGFRA;GRIN2A;NRAS;CAMK2D;ERBB4;KRAS;EREG
Signaling by FGFR1 in disease_Homo sapiens_R-HSA-5655302	3/38	0.0193322	NRAS;BAG4;KRAS
Signaling by FGFR4 in disease_Homo sapiens_R-HSA-5655291	2/11	0.0193322	NRAS;KRAS
Signaling by Interleukins_Homo sapiens_R-HSA-449147	9/392	0.0193322	PDGFRA;GRIN2A;NRAS;CAMK2D;ERBB4;LIFR;KRAS;EREG;SKP1
Interleukin-2 signaling_Homo sapiens_R-HSA-451927	7/252	0.0196673	PDGFRA;GRIN2A;NRAS;CAMK2D;ERBB4;KRAS;EREG
Signalling to ERKs_Homo sapiens_R-HSA-187687	7/253	0.0197004	PDGFRA;GRIN2A;NRAS;CAMK2D;ERBB4;KRAS;EREG
Activation of NMDA receptor upon glutamate binding and postsynaptic events_Homo sapiens_R-HSA-442755	3/39	0.0197004	CAMK2D;GRIN2A;CREB1
RNA Polymerase III Abortive And Retractive Initiation_Homo sapiens_R-HSA-749476	3/41	0.0222054	POU2F1;NFIB;POLR3G
RNA Polymerase III Transcription_Homo sapiens_R-HSA-74158	3/41	0.0222054	POU2F1;NFIB;POLR3G
Interleukin-3, 5 and GM-CSF signaling_Homo sapiens_R-HSA-512988	7/261	0.0224731	PDGFRA;GRIN2A;NRAS;CAMK2D;ERBB4;KRAS;EREG
TP53 Regulates Metabolic Genes_Homo sapiens_R-HSA-5628897	4/84	0.0224731	NDUFA4;PTEN;TP63;TNRC6B
BMAL1:CLOCK,NPAS2 activates circadian gene expression_Homo sapiens_R-HSA-1368108	3/42	0.0229898	CREB1;RORA;NR3C1
ERBB2 Activates PTK6 Signaling_Homo sapiens_R-HSA-8847993	2/13	0.0238341	ERBB4;EREG
p38MAPK events_Homo sapiens_R-HSA-171007	2/13	0.0238341	NRAS;KRAS
Signaling by Activin_Homo sapiens_R-HSA-1502540	2/13	0.0238341	SMAD4;ACVR1C
Inositol phosphate metabolism_Homo sapiens_R-HSA-1483249	3/44	0.0250737	INPP4A;IPMK;PTEN
Neurotransmitter Receptor Binding And Downstream Transmission In The Postsynaptic Cell_Homo sapiens_R-HSA-112314	5/142	0.0250737	GRIN2A;CAMK2D;CREB1;GABRA4;MDM2
Negative regulation of the PI3K/AKT network_Homo sapiens_R-HSA-199418	4/90	0.0266483	PDGFRA;ERBB4;PTEN;EREG
Transcriptional Regulation by TP53_Homo sapiens_R-HSA-3700989	8/348	0.0273807	NDUFA4;MDM2;PTEN;PMAIP1;E2F7;TP63;GTF2H5;TNRC6B
Constitutive Signaling by EGFRvIII_Homo sapiens_R-HSA-5637810	2/15	0.0289655	NRAS;KRAS
Signaling by EGFRvIII in Cancer_Homo sapiens_R-HSA-5637812	2/15	0.0289655	NRAS;KRAS
Activation of BAD and translocation to mitochondria_Homo sapiens_R-HSA-111447	2/15	0.0289655	PPP3R1;BCL2
Prolactin receptor signaling_Homo sapiens_R-HSA-1170546	2/15	0.0289655	PRLR;SKP1
ERBB2 Regulates Cell Motility_Homo sapiens_R-HSA-6785631	2/15	0.0289655	ERBB4;EREG
IRS-mediated signalling_Homo sapiens_R-HSA-112399	7/284	0.0302985	PDGFRA;GRIN2A;NRAS;CAMK2D;ERBB4;KRAS;EREG
Amino acid and oligopeptide SLC transporters_Homo sapiens_R-HSA-425374	3/49	0.0307262	SLC7A11;SLC38A2;SLC7A2
Immune System_Homo sapiens_R-HSA-168256	21/1547	0.0315771	PDGFRA;CAMK2D;PTEN;LIFR;PRLR;EREG;NRAS;GRIN2A;PPP3R1;CREB1;ERBB4;TRIM2;BCL2;MDM2;POLR3G;KRAS;MASP1;TLR4;PAG1;TNRC6B;SKP1
PI3K events in ERBB2 signaling_Homo sapiens_R-HSA-1963642	2/16	0.0316972	ERBB4;EREG
FCERI mediated MAPK activation_Homo sapiens_R-HSA-2871796	7/289	0.0319935	PDGFRA;GRIN2A;NRAS;CAMK2D;ERBB4;KRAS;EREG
Ras activation uopn Ca2+ infux through NMDA receptor_Homo sapiens_R-HSA-442982	2/17	0.0347627	CAMK2D;GRIN2A
Unblocking of NMDA receptor, glutamate binding and activation_Homo sapiens_R-HSA-438066	2/17	0.0347627	CAMK2D;GRIN2A
Cytokine Signaling in Immune system_Homo sapiens_R-HSA-1280215	11/620	0.0361215	PDGFRA;GRIN2A;NRAS;CAMK2D;ERBB4;TRIM2;LIFR;KRAS;PRLR;EREG;SKP1
Apoptosis_Homo sapiens_R-HSA-109581	5/163	0.0372087	PPP3R1;BCL2;PMAIP1;TLR4;TP63
Neuronal System_Homo sapiens_R-HSA-112316	7/301	0.0372087	GRIN2A;CAMK2D;CREB1;GABRA4;MDM2;CASK;SLC38A2
SHC-mediated cascade:FGFR3_Homo sapiens_R-HSA-5654704	2/18	0.0372087	NRAS;KRAS
Tie2 Signaling_Homo sapiens_R-HSA-210993	2/18	0.0372087	NRAS;KRAS
Programmed Cell Death_Homo sapiens_R-HSA-5357801	5/166	0.0393125	PPP3R1;BCL2;PMAIP1;TLR4;TP63
Constitutive Signaling by Ligand-Responsive EGFR Cancer Variants_Homo sapiens_R-HSA-1236382	2/19	0.0393125	NRAS;KRAS
Signaling by EGFR in Cancer_Homo sapiens_R-HSA-1643713	2/19	0.0393125	NRAS;KRAS
Signaling by Ligand-Responsive EGFR Variants in Cancer_Homo sapiens_R-HSA-5637815	2/19	0.0393125	NRAS;KRAS
TP53 Regulates Transcription of Genes Involved in Cytochrome C Release_Homo sapiens_R-HSA-6803204	2/19	0.0393125	PMAIP1;TP63
Signaling by NODAL_Homo sapiens_R-HSA-1181150	2/19	0.0393125	SMAD4;ACVR1C
SHC-mediated cascade:FGFR1_Homo sapiens_R-HSA-5654688	2/21	0.0467669	NRAS;KRAS
CD209 (DC-SIGN) signaling_Homo sapiens_R-HSA-5621575	2/21	0.0467669	NRAS;KRAS
VEGFA-VEGFR2 Pathway_Homo sapiens_R-HSA-4420097	7/320	0.0467669	PDGFRA;GRIN2A;NRAS;CAMK2D;ERBB4;KRAS;EREG
Ca2+ pathway_Homo sapiens_R-HSA-4086398	3/61	0.0467669	FZD3;PPP3R1;TNRC6B
Constitutive Signaling by Aberrant PI3K in Cancer_Homo sapiens_R-HSA-2219530	3/61	0.0467669	PDGFRA;ERBB4;EREG
RNA Polymerase I, RNA Polymerase III, and Mitochondrial Transcription_Homo sapiens_R-HSA-504046	4/116	0.0489709	POU2F1;NFIB;POLR3G;GTF2H5
Signaling by FGFR3 in disease_Homo sapiens_R-HSA-5655332	2/22	0.0490568	NRAS;KRAS
Signaling by FGFR3 point mutants in cancer_Homo sapiens_R-HSA-8853338	2/22	0.0490568	NRAS;KRAS
Signaling by FGFR in disease_Homo sapiens_R-HSA-1226099	3/63	0.0490792	NRAS;BAG4;KRAS
Synthesis of substrates in N-glycan biosythesis_Homo sapiens_R-HSA-446219	3/63	0.0490792	NUS1;GFPT1;ST8SIA4
Signaling by VEGF_Homo sapiens_R-HSA-194138	7/328	0.0502657	PDGFRA;GRIN2A;NRAS;CAMK2D;ERBB4;KRAS;EREG
SHC-mediated cascade:FGFR4_Homo sapiens_R-HSA-5654719	2/23	0.0514552	NRAS;KRAS
RNA Polymerase III Transcription Termination_Homo sapiens_R-HSA-73980	2/23	0.0514552	NFIB;POLR3G
Signaling by NOTCH_Homo sapiens_R-HSA-157118	4/122	0.0545716	CREB1;SEL1L;SKP1;TNRC6B
C-type lectin receptors (CLRs)_Homo sapiens_R-HSA-5621481	4/123	0.0556677	NRAS;PPP3R1;KRAS;SKP1
Constitutive Signaling by AKT1 E17K in Cancer_Homo sapiens_R-HSA-5674400	2/25	0.0586532	CREB1;MDM2
RAF activation_Homo sapiens_R-HSA-5673000	2/25	0.0586532	NRAS;KRAS
SHC-mediated cascade:FGFR2_Homo sapiens_R-HSA-5654699	2/26	0.0623199	NRAS;KRAS
PTK6 Regulates RHO GTPases, RAS GTPase and MAP kinases_Homo sapiens_R-HSA-8849471	2/26	0.0623199	NRAS;KRAS
Gastrin-CREB signalling pathway via PKC and MAPK_Homo sapiens_R-HSA-881907	8/432	0.0643588	PDGFRA;GRIN2A;NRAS;CAMK2D;CREB1;ERBB4;KRAS;EREG
RNA Polymerase III Transcription Initiation From Type 3 Promoter_Homo sapiens_R-HSA-76071	2/28	0.0707569	POU2F1;POLR3G
Biosynthesis of the N-glycan precursor (dolichol lipid-linked oligosaccharide, LLO) and transfer to a nascent protein_Homo sapiens_R-HSA-446193	3/78	0.079338	NUS1;GFPT1;ST8SIA4
Glutamate Binding, Activation of AMPA Receptors and Synaptic Plasticity_Homo sapiens_R-HSA-399721	2/31	0.0839853	CAMK2D;MDM2
Trafficking of AMPA receptors_Homo sapiens_R-HSA-399719	2/31	0.0839853	CAMK2D;MDM2
Oncogene Induced Senescence_Homo sapiens_R-HSA-2559585	2/32	0.0885322	MDM2;TNRC6B
PI5P, PP2A and IER3 Regulate PI3K/AKT Signaling_Homo sapiens_R-HSA-6811558	3/83	0.0907061	PDGFRA;ERBB4;EREG
Synthesis of PIPs at the plasma membrane_Homo sapiens_R-HSA-1660499	2/34	0.0978109	INPP4A;PTEN

## Sheet:  Green
REACTOME 2016- Biological Pathways (194 enriched pathways)
Term	Overlap	Adjusted P value	Genes
Signaling by SCF-KIT_Homo sapiens_R-HSA-1433557	16/325	0.000127592	CDKN1A;CUL3;PTEN;IQGAP1;KSR2;FOXO3;CBL;SPRED1;ERBB3;RASA1;CHEK1;AKT1;RICTOR;KRAS;FGFR3;TNRC6B
Signaling by PTK6_Homo sapiens_R-HSA-8848021	8/67	0.000127592	SPRED1;CCND1;ERBB3;RASA1;AKT1;KRAS;CBL;NR3C1
Signaling by ERBB4_Homo sapiens_R-HSA-1236394	16/330	0.000127592	CDKN1A;CUL3;PTEN;IQGAP1;KSR2;FOXO3;NCSTN;SPRED1;ERBB3;RASA1;AKT1;RICTOR;PGR;KRAS;FGFR3;TNRC6B
Signaling by EGFR_Homo sapiens_R-HSA-177929	16/355	0.000249629	CDKN1A;CUL3;PTEN;IQGAP1;KSR2;FOXO3;CBL;SPRED1;ERBB3;RASA1;AKT1;RICTOR;KRAS;FGFR3;PAG1;TNRC6B
Signaling by FGFR4_Homo sapiens_R-HSA-5654743	15/332	0.000340131	CDKN1A;CUL3;PTEN;IQGAP1;KSR2;FOXO3;CBL;SPRED1;ERBB3;RASA1;AKT1;RICTOR;KRAS;FGFR3;TNRC6B
Signaling by FGFR3_Homo sapiens_R-HSA-5654741	15/333	0.000340131	CDKN1A;CUL3;PTEN;IQGAP1;KSR2;FOXO3;CBL;SPRED1;ERBB3;RASA1;AKT1;RICTOR;KRAS;FGFR3;TNRC6B
Signaling by FGFR1_Homo sapiens_R-HSA-5654736	15/336	0.000340131	CDKN1A;CUL3;PTEN;IQGAP1;KSR2;FOXO3;CBL;SPRED1;ERBB3;RASA1;AKT1;RICTOR;KRAS;FGFR3;TNRC6B
Developmental Biology_Homo sapiens_R-HSA-1266738	24/786	0.000340131	CUL3;IQGAP1;KSR2;ANK3;LAMC1;FOXO3;ACVR2B;PBX1;VEGFA;SOX2;TIAM1;NCSTN;SPRED1;ACVR1C;MAFB;ERBB3;RASA1;ST8SIA4;AKT1;TCF4;KRAS;MET;FGFR3;PLXNA4
GAB1 signalosome_Homo sapiens_R-HSA-180292	9/125	0.000507122	CDKN1A;ERBB3;PTEN;AKT1;RICTOR;FOXO3;FGFR3;PAG1;TNRC6B
Signaling by FGFR2_Homo sapiens_R-HSA-5654738	15/361	0.000507122	CDKN1A;CUL3;PTEN;IQGAP1;KSR2;FOXO3;CBL;SPRED1;ERBB3;RASA1;AKT1;RICTOR;KRAS;FGFR3;TNRC6B
Signaling by FGFR_Homo sapiens_R-HSA-190236	15/366	0.000507122	CDKN1A;CUL3;PTEN;IQGAP1;KSR2;FOXO3;CBL;SPRED1;ERBB3;RASA1;AKT1;RICTOR;KRAS;FGFR3;TNRC6B
Signal Transduction_Homo sapiens_R-HSA-162582	49/2465	0.000507122	CDKN1A;PTEN;NR3C1;IGF1R;RGS4;SOX2;SPRED1;RGS2;CCND1;CHEK1;AKT1;PDK3;CASR;FBXW7;PRKCB;STRADB;KSR2;TIAM1;PPM1A;RASA1;PGR;TP53;PAFAH1B1;CUL3;OPRL1;IQGAP1;CBL;FOXO3;PTHLH;LRP6;NCSTN;CALCR;ACVR1C;ERBB3;RICTOR;PAG1;WNT4;FZD3;CFLAR;ACVR2B;VEGFA;RPS6KB1;SP1;CDK1;TCF4;KRAS;FGFR3;TNRC6B;TJP2
Downstream signaling of activated FGFR2_Homo sapiens_R-HSA-5654696	14/329	0.000507122	CDKN1A;CUL3;PTEN;IQGAP1;KSR2;FOXO3;SPRED1;ERBB3;RASA1;AKT1;RICTOR;KRAS;FGFR3;TNRC6B
Downstream signaling of activated FGFR3_Homo sapiens_R-HSA-5654708	14/329	0.000507122	CDKN1A;CUL3;PTEN;IQGAP1;KSR2;FOXO3;SPRED1;ERBB3;RASA1;AKT1;RICTOR;KRAS;FGFR3;TNRC6B
Downstream signaling of activated FGFR4_Homo sapiens_R-HSA-5654716	14/329	0.000507122	CDKN1A;CUL3;PTEN;IQGAP1;KSR2;FOXO3;SPRED1;ERBB3;RASA1;AKT1;RICTOR;KRAS;FGFR3;TNRC6B
IGF1R signaling cascade_Homo sapiens_R-HSA-2428924	13/288	0.000507122	STRADB;CUL3;IQGAP1;KSR2;IGF1R;PPM1A;SPRED1;ERBB3;RPS6KB1;RASA1;AKT1;KRAS;FGFR3
IRS-related events triggered by IGF1R_Homo sapiens_R-HSA-2428928	13/288	0.000507122	STRADB;CUL3;IQGAP1;KSR2;IGF1R;PPM1A;SPRED1;ERBB3;RPS6KB1;RASA1;AKT1;KRAS;FGFR3
Signaling by Type 1 Insulin-like Growth Factor 1 Receptor (IGF1R)_Homo sapiens_R-HSA-2404192	13/288	0.000507122	STRADB;CUL3;IQGAP1;KSR2;IGF1R;PPM1A;SPRED1;ERBB3;RPS6KB1;RASA1;AKT1;KRAS;FGFR3
Downstream signaling of activated FGFR1_Homo sapiens_R-HSA-5654687	14/332	0.000507122	CDKN1A;CUL3;PTEN;IQGAP1;KSR2;FOXO3;SPRED1;ERBB3;RASA1;AKT1;RICTOR;KRAS;FGFR3;TNRC6B
Downstream signal transduction_Homo sapiens_R-HSA-186763	14/341	0.000648474	CDKN1A;CUL3;PTEN;IQGAP1;KSR2;FOXO3;SPRED1;ERBB3;RASA1;AKT1;RICTOR;KRAS;FGFR3;TNRC6B
Oncogene Induced Senescence_Homo sapiens_R-HSA-2559585	5/32	0.000649425	CDK6;SP1;E2F2;TP53;TNRC6B
DAP12 signaling_Homo sapiens_R-HSA-2424491	14/344	0.000649425	CDKN1A;CUL3;PTEN;IQGAP1;KSR2;FOXO3;SPRED1;ERBB3;RASA1;AKT1;RICTOR;KRAS;FGFR3;TNRC6B
Signalling by NGF_Homo sapiens_R-HSA-166520	16/450	0.000846829	CDKN1A;CUL3;PTEN;IQGAP1;KSR2;FOXO3;TIAM1;NCSTN;SPRED1;ERBB3;RASA1;AKT1;RICTOR;KRAS;FGFR3;TNRC6B
Regulation of TP53 Degradation_Homo sapiens_R-HSA-6804757	5/35	0.000893695	CCNA2;CDK1;AKT1;RICTOR;TP53
DAP12 interactions_Homo sapiens_R-HSA-2172127	14/359	0.000894455	CDKN1A;CUL3;PTEN;IQGAP1;KSR2;FOXO3;SPRED1;ERBB3;RASA1;AKT1;RICTOR;KRAS;FGFR3;TNRC6B
Regulation of TP53 Expression and Degradation_Homo sapiens_R-HSA-6806003	5/36	0.000894455	CCNA2;CDK1;AKT1;RICTOR;TP53
Signaling by PDGF_Homo sapiens_R-HSA-186797	14/364	0.000894455	CDKN1A;CUL3;PTEN;IQGAP1;KSR2;FOXO3;SPRED1;ERBB3;RASA1;AKT1;RICTOR;KRAS;FGFR3;TNRC6B
Downstream signaling events of B Cell Receptor (BCR)_Homo sapiens_R-HSA-1168372	10/192	0.000894455	CDKN1A;ERBB3;PRKCB;PTEN;AKT1;KRAS;RICTOR;FOXO3;FGFR3;TNRC6B
Signaling by the B Cell Receptor (BCR)_Homo sapiens_R-HSA-983705	11/233	0.000894455	CDKN1A;ERBB3;PRKCB;PTEN;AKT1;RICTOR;KRAS;FOXO3;CBL;FGFR3;TNRC6B
Cyclin D associated events in G1_Homo sapiens_R-HSA-69231	5/38	0.000894455	CDKN1A;CDK6;CCND1;E2F2;PPP2R2A
G1 Phase_Homo sapiens_R-HSA-69236	5/38	0.000894455	CDKN1A;CDK6;CCND1;E2F2;PPP2R2A
PI-3K cascade:FGFR1_Homo sapiens_R-HSA-5654689	8/122	0.000894455	CDKN1A;ERBB3;PTEN;AKT1;RICTOR;FOXO3;FGFR3;TNRC6B
PI-3K cascade:FGFR2_Homo sapiens_R-HSA-5654695	8/122	0.000894455	CDKN1A;ERBB3;PTEN;AKT1;RICTOR;FOXO3;FGFR3;TNRC6B
PI-3K cascade:FGFR3_Homo sapiens_R-HSA-5654710	8/122	0.000894455	CDKN1A;ERBB3;PTEN;AKT1;RICTOR;FOXO3;FGFR3;TNRC6B
PI-3K cascade:FGFR4_Homo sapiens_R-HSA-5654720	8/122	0.000894455	CDKN1A;ERBB3;PTEN;AKT1;RICTOR;FOXO3;FGFR3;TNRC6B
PI3K events in ERBB4 signaling_Homo sapiens_R-HSA-1250342	8/122	0.000894455	CDKN1A;ERBB3;PTEN;AKT1;RICTOR;FOXO3;FGFR3;TNRC6B
PIP3 activates AKT signaling_Homo sapiens_R-HSA-1257604	8/122	0.000894455	CDKN1A;ERBB3;PTEN;AKT1;RICTOR;FOXO3;FGFR3;TNRC6B
NGF signalling via TRKA from the plasma membrane_Homo sapiens_R-HSA-187037	14/374	0.000934089	CDKN1A;CUL3;PTEN;IQGAP1;KSR2;FOXO3;SPRED1;ERBB3;RASA1;AKT1;RICTOR;KRAS;FGFR3;TNRC6B
IRS-mediated signalling_Homo sapiens_R-HSA-112399	12/284	0.00098325	PPM1A;SPRED1;ERBB3;RPS6KB1;STRADB;CUL3;RASA1;AKT1;KRAS;IQGAP1;KSR2;FGFR3
PI3K/AKT activation_Homo sapiens_R-HSA-198203	8/125	0.00098325	CDKN1A;ERBB3;PTEN;AKT1;RICTOR;FOXO3;FGFR3;TNRC6B
Insulin receptor signalling cascade_Homo sapiens_R-HSA-74751	12/287	0.00104202	PPM1A;SPRED1;ERBB3;RPS6KB1;STRADB;CUL3;RASA1;AKT1;KRAS;IQGAP1;KSR2;FGFR3
Fc epsilon receptor (FCERI) signaling_Homo sapiens_R-HSA-2454202	14/395	0.00151023	CDKN1A;CUL3;PTEN;IQGAP1;KSR2;FOXO3;SPRED1;ERBB3;RASA1;AKT1;RICTOR;KRAS;FGFR3;TNRC6B
Transcriptional Regulation by TP53_Homo sapiens_R-HSA-3700989	13/348	0.00155335	CDKN1A;PTEN;BRCA1;HIPK2;CCNA2;SESN1;CHEK1;CDK1;AKT1;PMAIP1;RICTOR;TP53;TNRC6B
Constitutive Signaling by AKT1 E17K in Cancer_Homo sapiens_R-HSA-5674400	4/25	0.00196071	CDKN1A;AKT1;RICTOR;FOXO3
Signaling by Insulin receptor_Homo sapiens_R-HSA-74752	12/311	0.00202472	PPM1A;SPRED1;ERBB3;RPS6KB1;STRADB;CUL3;RASA1;AKT1;KRAS;IQGAP1;KSR2;FGFR3
Axon guidance_Homo sapiens_R-HSA-422475	16/515	0.00205557	CUL3;IQGAP1;KSR2;ANK3;LAMC1;VEGFA;TIAM1;NCSTN;SPRED1;ERBB3;RASA1;ST8SIA4;KRAS;MET;FGFR3;PLXNA4
DNA Double-Strand Break Repair_Homo sapiens_R-HSA-5693532	8/145	0.00235928	CCNA2;EYA1;CHEK1;WHSC1;CLSPN;BRCA1;TP53;POLH
VEGFA-VEGFR2 Pathway_Homo sapiens_R-HSA-4420097	12/320	0.00247239	SPRED1;ERBB3;PRKCB;CUL3;RASA1;AKT1;RICTOR;KRAS;IQGAP1;KSR2;FGFR3;VEGFA
Regulation of TP53 Activity_Homo sapiens_R-HSA-5633007	8/151	0.00297737	CCNA2;CHEK1;CDK1;AKT1;RICTOR;BRCA1;TP53;HIPK2
Signaling by VEGF_Homo sapiens_R-HSA-194138	12/328	0.00297737	SPRED1;ERBB3;PRKCB;CUL3;RASA1;AKT1;RICTOR;KRAS;IQGAP1;KSR2;FGFR3;VEGFA
Activation of BH3-only proteins_Homo sapiens_R-HSA-114452	4/29	0.00307091	BCL2;AKT1;PMAIP1;TP53
MAPK family signaling cascades_Homo sapiens_R-HSA-5683057	11/284	0.00320096	SPRED1;ERBB3;CUL3;RASA1;CDK1;KRAS;IQGAP1;KSR2;FOXO3;FGFR3;TNRC6B
Diseases of signal transduction_Homo sapiens_R-HSA-5663202	11/288	0.00353876	NCSTN;CDKN1A;ERBB3;FBXW7;AKT1;RICTOR;KRAS;FOXO3;CBL;FGFR3;LRP6
TP53 Regulates Transcription of Genes Involved in G1 Cell Cycle Arrest_Homo sapiens_R-HSA-6804116	3/13	0.00375712	CCNA2;CDKN1A;TP53
PI3K/AKT Signaling in Cancer_Homo sapiens_R-HSA-2219528	6/86	0.00377203	CDKN1A;ERBB3;AKT1;RICTOR;FOXO3;FGFR3
VEGFR2 mediated cell proliferation_Homo sapiens_R-HSA-5218921	10/248	0.00410771	SPRED1;ERBB3;PRKCB;CUL3;RASA1;KRAS;IQGAP1;KSR2;FGFR3;VEGFA
Role of LAT2/NTAL/LAB on calcium mobilization_Homo sapiens_R-HSA-2730905	8/162	0.00412927	CDKN1A;ERBB3;PTEN;AKT1;RICTOR;FOXO3;FGFR3;TNRC6B
Generic Transcription Pathway_Homo sapiens_R-HSA-212436	20/812	0.00543542	CDKN1A;THRB;PTEN;BRCA1;TBX5;NR3C1;HIPK2;CCNA2;PPM1A;SP1;SESN1;ZNF704;CHEK1;CDK1;AKT1;PMAIP1;RICTOR;PGR;TP53;TNRC6B
Adaptive Immune System_Homo sapiens_R-HSA-1280218	19/762	0.00637735	DCTN5;CDKN1A;PRKCB;FBXW7;CUL3;PTEN;FOXO3;CBL;CTSS;RNF144B;ERBB3;RNF138;AKT1;RICTOR;KRAS;UBE2K;FGFR3;PAG1;TNRC6B
Membrane Trafficking_Homo sapiens_R-HSA-199991	13/420	0.00679657	NSF;DCTN5;TFRC;SORT1;MYO5A;ANK3;NAPG;PPP6C;VPS53;STX6;AKT1;PAFAH1B2;PAFAH1B1
Mitotic G1-G1/S phases_Homo sapiens_R-HSA-453279	7/136	0.0069981	CCNA2;CDKN1A;CDK6;CCND1;CDK1;E2F2;PPP2R2A
mTOR signalling_Homo sapiens_R-HSA-165159	4/39	0.00804342	PPM1A;RPS6KB1;STRADB;AKT1
Cell Cycle Checkpoints_Homo sapiens_R-HSA-69620	8/182	0.00805778	CCNA2;CDKN1A;CHEK1;CDK1;WHSC1;CLSPN;BRCA1;TP53
PKB-mediated events_Homo sapiens_R-HSA-109703	4/40	0.00858559	PPM1A;RPS6KB1;STRADB;AKT1
Signaling by NODAL_Homo sapiens_R-HSA-1181150	3/19	0.0100272	ACVR1C;FOXO3;ACVR2B
Intrinsic Pathway for Apoptosis_Homo sapiens_R-HSA-109606	4/42	0.0100272	BCL2;AKT1;PMAIP1;TP53
MAPK1/MAPK3 signaling_Homo sapiens_R-HSA-5684996	9/241	0.0114765	SPRED1;ERBB3;CUL3;RASA1;CDK1;KRAS;IQGAP1;KSR2;FGFR3
Cell Cycle_Homo sapiens_R-HSA-1640170	15/566	0.0114765	CDKN1A;PRKCB;PPP2R2A;BRCA1;CCNA2;PCM1;CDK6;CCND1;CHEK1;CDK1;E2F2;WHSC1;CLSPN;TP53;PAFAH1B1
HDR through Homologous Recombination (HR) or Single Strand Annealing (SSA)_Homo sapiens_R-HSA-5693567	6/112	0.0121502	CCNA2;CHEK1;WHSC1;CLSPN;BRCA1;POLH
G2/M DNA damage checkpoint_Homo sapiens_R-HSA-69473	5/78	0.0137131	CHEK1;CDK1;BRCA1;WHSC1;TP53
PI3K Cascade_Homo sapiens_R-HSA-109704	5/79	0.0141282	PPM1A;RPS6KB1;STRADB;AKT1;FGFR3
Cyclin A/B1 associated events during G2/M transition_Homo sapiens_R-HSA-69273	3/22	0.0141282	CCNA2;CDK1;PPP2R2A
TP53 Regulates Transcription of Cell Cycle Genes_Homo sapiens_R-HSA-6791312	4/48	0.0147983	CCNA2;CDKN1A;CDK1;TP53
Homology Directed Repair_Homo sapiens_R-HSA-5693538	6/118	0.0147983	CCNA2;CHEK1;WHSC1;CLSPN;BRCA1;POLH
Processing of DNA double-strand break ends_Homo sapiens_R-HSA-5693607	5/81	0.0149849	CCNA2;CHEK1;BRCA1;WHSC1;CLSPN
Cellular Senescence_Homo sapiens_R-HSA-2559583	7/161	0.0149849	CCNA2;CDKN1A;CDK6;SP1;E2F2;TP53;TNRC6B
Transport to the Golgi and subsequent modification_Homo sapiens_R-HSA-948021	7/162	0.0151474	NSF;PPP6C;DCTN5;MGAT4A;ST8SIA3;ANK3;NAPG
Retrograde transport at the Trans-Golgi-Network_Homo sapiens_R-HSA-6811440	4/49	0.0151474	NSF;VPS53;STX6;NAPG
Apoptosis_Homo sapiens_R-HSA-109581	7/163	0.015463	BCL2;AKT1;PMAIP1;CLSPN;CFLAR;TP53;TJP2
TP53 Regulates Metabolic Genes_Homo sapiens_R-HSA-5628897	5/84	0.0164585	SESN1;PTEN;AKT1;TP53;TNRC6B
Interleukin-3, 5 and GM-CSF signaling_Homo sapiens_R-HSA-512988	9/261	0.0164585	SPRED1;ERBB3;CUL3;RASA1;KRAS;IQGAP1;KSR2;CBL;FGFR3
Programmed Cell Death_Homo sapiens_R-HSA-5357801	7/166	0.0165161	BCL2;AKT1;PMAIP1;CLSPN;CFLAR;TP53;TJP2
NCAM signaling for neurite out-growth_Homo sapiens_R-HSA-375165	9/266	0.0182496	SPRED1;ERBB3;CUL3;RASA1;ST8SIA4;KRAS;IQGAP1;KSR2;FGFR3
PTK6 Regulates RHO GTPases, RAS GTPase and MAP kinases_Homo sapiens_R-HSA-8849471	3/26	0.0196828	SPRED1;RASA1;KRAS
Vesicle-mediated transport_Homo sapiens_R-HSA-5653656	13/492	0.0196828	NSF;DCTN5;TFRC;SORT1;MYO5A;ANK3;NAPG;PPP6C;VPS53;STX6;AKT1;PAFAH1B2;PAFAH1B1
G2/M Transition_Homo sapiens_R-HSA-69275	7/173	0.0197283	CCNA2;CDKN1A;PCM1;CDK1;PPP2R2A;TP53;PAFAH1B1
Regulation of TP53 Activity through Phosphorylation_Homo sapiens_R-HSA-6804756	5/89	0.0197283	CCNA2;CHEK1;BRCA1;TP53;HIPK2
Innate Immune System_Homo sapiens_R-HSA-168249	18/807	0.0202788	CDKN1A;CUL3;PTEN;MYO5A;IQGAP1;KSR2;FOXO3;CTSS;SPRED1;ERBB3;RASA1;BCL2;AKT1;RICTOR;KRAS;UBE2K;FGFR3;TNRC6B
Mitotic G2-G2/M phases_Homo sapiens_R-HSA-453274	7/175	0.0204516	CCNA2;CDKN1A;PCM1;CDK1;PPP2R2A;TP53;PAFAH1B1
Pyruvate metabolism_Homo sapiens_R-HSA-70268	3/27	0.0206364	SLC16A1;PDP2;PDK3
BH3-only proteins associate with and inactivate anti-apoptotic BCL-2 members_Homo sapiens_R-HSA-111453	2/8	0.0212652	BCL2;PMAIP1
Intra-Golgi and retrograde Golgi-to-ER traffic_Homo sapiens_R-HSA-6811442	7/179	0.0224224	NSF;DCTN5;VPS53;STX6;NAPG;PAFAH1B2;PAFAH1B1
Recruitment and ATM-mediated phosphorylation of repair and signaling proteins at DNA double strand breaks_Homo sapiens_R-HSA-5693565	4/58	0.0236001	EYA1;BRCA1;WHSC1;TP53
COPI-independent Golgi-to-ER retrograde traffic_Homo sapiens_R-HSA-6811436	3/29	0.0238418	DCTN5;PAFAH1B2;PAFAH1B1
DNA Double Strand Break Response_Homo sapiens_R-HSA-5693606	4/59	0.0238418	EYA1;BRCA1;WHSC1;TP53
DNA Repair_Homo sapiens_R-HSA-73894	9/285	0.0238418	CCNA2;EYA1;CHEK1;BRCA1;WHSC1;CLSPN;TP53;POLH;UNG
SHC-related events triggered by IGF1R_Homo sapiens_R-HSA-2428933	2/9	0.0238418	KRAS;IGF1R
PTK6 Regulates RTKs and Their Effectors AKT1 and DOK1_Homo sapiens_R-HSA-8849469	2/9	0.0238418	AKT1;CBL
AKT phosphorylates targets in the nucleus_Homo sapiens_R-HSA-198693	2/9	0.0238418	AKT1;FOXO3
GRB2 events in EGFR signaling_Homo sapiens_R-HSA-179812	8/235	0.0238418	SPRED1;ERBB3;CUL3;RASA1;KRAS;IQGAP1;KSR2;FGFR3
RAF/MAP kinase cascade_Homo sapiens_R-HSA-5673001	8/235	0.0238418	SPRED1;ERBB3;CUL3;RASA1;KRAS;IQGAP1;KSR2;FGFR3
SHC1 events in EGFR signaling_Homo sapiens_R-HSA-180336	8/235	0.0238418	SPRED1;ERBB3;CUL3;RASA1;KRAS;IQGAP1;KSR2;FGFR3
SHC1 events in ERBB4 signaling_Homo sapiens_R-HSA-1250347	8/235	0.0238418	SPRED1;ERBB3;CUL3;RASA1;KRAS;IQGAP1;KSR2;FGFR3
SOS-mediated signalling_Homo sapiens_R-HSA-112412	8/235	0.0238418	SPRED1;ERBB3;CUL3;RASA1;KRAS;IQGAP1;KSR2;FGFR3
FRS-mediated FGFR1 signaling_Homo sapiens_R-HSA-5654693	8/236	0.0238418	SPRED1;ERBB3;CUL3;RASA1;KRAS;IQGAP1;KSR2;FGFR3
FRS-mediated FGFR2 signaling_Homo sapiens_R-HSA-5654700	8/236	0.0238418	SPRED1;ERBB3;CUL3;RASA1;KRAS;IQGAP1;KSR2;FGFR3
FRS-mediated FGFR3 signaling_Homo sapiens_R-HSA-5654706	8/236	0.0238418	SPRED1;ERBB3;CUL3;RASA1;KRAS;IQGAP1;KSR2;FGFR3
FRS-mediated FGFR4 signaling_Homo sapiens_R-HSA-5654712	8/236	0.0238418	SPRED1;ERBB3;CUL3;RASA1;KRAS;IQGAP1;KSR2;FGFR3
Metabolism of water-soluble vitamins and cofactors_Homo sapiens_R-HSA-196849	5/98	0.0238418	MMAB;MTHFR;ENPP1;MOCS1;SLC19A2
Transport of inorganic cations/anions and amino acids/oligopeptides_Homo sapiens_R-HSA-425393	5/99	0.0246687	SLC24A4;SLC9A8;SLC1A2;SRI;SLC7A2
ARMS-mediated activation_Homo sapiens_R-HSA-170984	8/239	0.0248166	SPRED1;ERBB3;CUL3;RASA1;KRAS;IQGAP1;KSR2;FGFR3
Signalling to p38 via RIT and RIN_Homo sapiens_R-HSA-187706	8/239	0.0248166	SPRED1;ERBB3;CUL3;RASA1;KRAS;IQGAP1;KSR2;FGFR3
Frs2-mediated activation_Homo sapiens_R-HSA-170968	8/240	0.0252162	SPRED1;ERBB3;CUL3;RASA1;KRAS;IQGAP1;KSR2;FGFR3
Signaling by Wnt_Homo sapiens_R-HSA-195721	9/295	0.0257774	SOX2;FZD3;PRKCB;CUL3;AKT1;TCF4;LRP6;TNRC6B;WNT4
Prolonged ERK activation events_Homo sapiens_R-HSA-169893	8/242	0.0257774	SPRED1;ERBB3;CUL3;RASA1;KRAS;IQGAP1;KSR2;FGFR3
Signaling by FGFR3 fusions in cancer_Homo sapiens_R-HSA-8853334	2/10	0.0257774	KRAS;FGFR3
eNOS activation_Homo sapiens_R-HSA-203615	2/10	0.0257774	AKT1;ZDHHC21
Regulation of signaling by NODAL_Homo sapiens_R-HSA-1433617	2/10	0.0257774	ACVR1C;ACVR2B
Signaling by Leptin_Homo sapiens_R-HSA-2586552	8/243	0.0257774	SPRED1;ERBB3;CUL3;RASA1;KRAS;IQGAP1;KSR2;FGFR3
Interleukin receptor SHC signaling_Homo sapiens_R-HSA-912526	8/245	0.0268321	SPRED1;ERBB3;CUL3;RASA1;KRAS;IQGAP1;KSR2;FGFR3
Signalling to RAS_Homo sapiens_R-HSA-167044	8/246	0.0270851	SPRED1;ERBB3;CUL3;RASA1;KRAS;IQGAP1;KSR2;FGFR3
G1/S DNA Damage Checkpoints_Homo sapiens_R-HSA-69615	4/65	0.0270851	CCNA2;CDKN1A;CHEK1;TP53
G2/M Checkpoints_Homo sapiens_R-HSA-69481	6/150	0.0291431	CHEK1;CDK1;WHSC1;CLSPN;BRCA1;TP53
Degradation of the extracellular matrix_Homo sapiens_R-HSA-1474228	5/106	0.0291972	NCSTN;MMP14;MMP16;LAMC1;CTSS
Regulation of RAS by GAPs_Homo sapiens_R-HSA-5658442	4/67	0.0294344	SPRED1;RASA1;CUL3;KRAS
Sodium/Calcium exchangers_Homo sapiens_R-HSA-425561	2/11	0.0295336	SLC24A4;SRI
Interleukin-2 signaling_Homo sapiens_R-HSA-451927	8/252	0.0299138	SPRED1;ERBB3;CUL3;RASA1;KRAS;IQGAP1;KSR2;FGFR3
Signalling to ERKs_Homo sapiens_R-HSA-187687	8/253	0.030374	SPRED1;ERBB3;CUL3;RASA1;KRAS;IQGAP1;KSR2;FGFR3
Cellular responses to stress_Homo sapiens_R-HSA-2262752	10/367	0.0318547	CCNA2;CDKN1A;CDK6;SP1;E2F2;HIF1AN;TP53;SIRT1;VEGFA;TNRC6B
Golgi-to-ER retrograde transport_Homo sapiens_R-HSA-8856688	5/110	0.0325003	NSF;DCTN5;NAPG;PAFAH1B2;PAFAH1B1
Chk1/Chk2(Cds1) mediated inactivation of Cyclin B:Cdk1 complex_Homo sapiens_R-HSA-75035	2/12	0.0334912	CHEK1;CDK1
Physiological factors_Homo sapiens_R-HSA-5578768	2/12	0.0334912	TBX5;HIPK2
Asparagine N-linked glycosylation_Homo sapiens_R-HSA-446203	8/259	0.0334912	NSF;PPP6C;DCTN5;MGAT4A;ST8SIA3;ST8SIA4;ANK3;NAPG
MAP2K and MAPK activation_Homo sapiens_R-HSA-5674135	3/38	0.0366615	KRAS;KSR2;IQGAP1
Downregulation of ERBB2:ERBB3 signaling_Homo sapiens_R-HSA-1358803	2/13	0.0379804	ERBB3;AKT1
AKT phosphorylates targets in the cytosol_Homo sapiens_R-HSA-198323	2/13	0.0379804	CDKN1A;AKT1
Signaling by Activin_Homo sapiens_R-HSA-1502540	2/13	0.0379804	ACVR1C;ACVR2B
Immune System_Homo sapiens_R-HSA-168256	27/1547	0.0390992	DCTN5;CDKN1A;CUL3;PTEN;IQGAP1;CBL;FOXO3;CTSS;SPRED1;ERBB3;RNF138;AKT1;RICTOR;NOS1;PAG1;FBXW7;PRKCB;MYO5A;KSR2;RNF144B;IFNG;RASA1;BCL2;KRAS;UBE2K;FGFR3;TNRC6B
Regulation of TP53 Activity through Association with Co-factors_Homo sapiens_R-HSA-6804759	2/14	0.043004	AKT1;TP53
Regulation of pyruvate dehydrogenase (PDH) complex_Homo sapiens_R-HSA-204174	2/14	0.043004	PDP2;PDK3
Pre-NOTCH Transcription and Translation_Homo sapiens_R-HSA-1912408	3/41	0.043004	CCND1;TP53;TNRC6B
COPI-mediated anterograde transport_Homo sapiens_R-HSA-6807878	4/78	0.044021	NSF;DCTN5;ANK3;NAPG
Signaling by NOTCH_Homo sapiens_R-HSA-157118	5/122	0.0451561	NCSTN;CCND1;FBXW7;TP53;TNRC6B
Constitutive Signaling by EGFRvIII_Homo sapiens_R-HSA-5637810	2/15	0.0463512	KRAS;CBL
Signaling by EGFRvIII in Cancer_Homo sapiens_R-HSA-5637812	2/15	0.0463512	KRAS;CBL
Activation of BAD and translocation to mitochondria_Homo sapiens_R-HSA-111447	2/15	0.0463512	BCL2;AKT1
N-Glycan antennae elongation_Homo sapiens_R-HSA-975577	2/15	0.0463512	MGAT4A;ST8SIA3
Depolymerisation of the Nuclear Lamina_Homo sapiens_R-HSA-4419969	2/15	0.0463512	PRKCB;CDK1
Negative regulation of TCF-dependent signaling by WNT ligand antagonists_Homo sapiens_R-HSA-3772470	2/15	0.0463512	LRP6;WNT4
Cell Cycle, Mitotic_Homo sapiens_R-HSA-69278	11/462	0.0486627	CCNA2;CDKN1A;PCM1;CDK6;CCND1;PRKCB;CDK1;E2F2;PPP2R2A;TP53;PAFAH1B1
Intra-Golgi traffic_Homo sapiens_R-HSA-6811438	3/44	0.0487328	NSF;STX6;NAPG
Signaling by ERBB2_Homo sapiens_R-HSA-1227986	3/45	0.0514665	ERBB3;AKT1;KRAS
Class B/2 (Secretin family receptors)_Homo sapiens_R-HSA-373080	4/84	0.0525947	FZD3;CALCR;PTHLH;WNT4
FCERI mediated MAPK activation_Homo sapiens_R-HSA-2871796	8/289	0.0536801	SPRED1;ERBB3;CUL3;RASA1;KRAS;IQGAP1;KSR2;FGFR3
ER to Golgi Anterograde Transport_Homo sapiens_R-HSA-199977	5/131	0.0553899	NSF;PPP6C;DCTN5;ANK3;NAPG
Trafficking of GluR2-containing AMPA receptors_Homo sapiens_R-HSA-416993	2/17	0.0558242	NSF;PRKCB
Formation of Senescence-Associated Heterochromatin Foci (SAHF)_Homo sapiens_R-HSA-2559584	2/17	0.0558242	CDKN1A;TP53
Butyrate Response Factor 1 (BRF1) binds and destabilizes mRNA_Homo sapiens_R-HSA-450385	2/17	0.0558242	AKT1;DCP1A
Pyruvate metabolism and Citric Acid (TCA) cycle_Homo sapiens_R-HSA-71406	3/48	0.0585822	SLC16A1;PDP2;PDK3
Cardiac conduction_Homo sapiens_R-HSA-5576891	5/135	0.0604177	KCNK10;SRI;NOS1;TBX5;HIPK2
SHC-mediated cascade:FGFR3_Homo sapiens_R-HSA-5654704	2/18	0.0604492	KRAS;FGFR3
SHC1 events in ERBB2 signaling_Homo sapiens_R-HSA-1250196	2/18	0.0604492	ERBB3;KRAS
TP53 Regulates Transcription of Genes Involved in G2 Cell Cycle Arrest_Homo sapiens_R-HSA-6804114	2/18	0.0604492	CDK1;TP53
Negative regulation of the PI3K/AKT network_Homo sapiens_R-HSA-199418	4/90	0.0618451	ERBB3;PTEN;AKT1;FGFR3
Gene Expression_Homo sapiens_R-HSA-74160	27/1631	0.0622284	CDKN1A;THRB;SF3B3;PTEN;PPP2R2A;BRCA1;NR3C1;SRP72;SESN1;ZNF704;CHEK1;AKT1;PMAIP1;SSR1;RICTOR;POU2F1;TBX5;SIRT1;HIPK2;CCNA2;PPM1A;SP1;CDK1;PGR;DCP1A;TP53;TNRC6B
Oxidative Stress Induced Senescence_Homo sapiens_R-HSA-2559580	4/91	0.0633857	CDK6;E2F2;TP53;TNRC6B
Constitutive Signaling by Ligand-Responsive EGFR Cancer Variants_Homo sapiens_R-HSA-1236382	2/19	0.0640699	KRAS;CBL
Signaling by EGFR in Cancer_Homo sapiens_R-HSA-1643713	2/19	0.0640699	KRAS;CBL
Signaling by Ligand-Responsive EGFR Variants in Cancer_Homo sapiens_R-HSA-5637815	2/19	0.0640699	KRAS;CBL
TP53 Regulates Transcription of Genes Involved in Cytochrome C Release_Homo sapiens_R-HSA-6803204	2/19	0.0640699	PMAIP1;TP53
Nuclear Receptor transcription pathway_Homo sapiens_R-HSA-383280	3/51	0.0640699	THRB;PGR;NR3C1
Gastrin-CREB signalling pathway via PKC and MAPK_Homo sapiens_R-HSA-881907	10/432	0.0686331	CASR;RGS2;SPRED1;ERBB3;CUL3;RASA1;KRAS;IQGAP1;KSR2;FGFR3
eNOS activation and regulation_Homo sapiens_R-HSA-203765	2/20	0.0693031	AKT1;ZDHHC21
Metabolism of nitric oxide_Homo sapiens_R-HSA-202131	2/20	0.0693031	AKT1;ZDHHC21
EPH-Ephrin signaling_Homo sapiens_R-HSA-2682334	4/95	0.0693031	TIAM1;NCSTN;RASA1;VEGFA
Muscle contraction_Homo sapiens_R-HSA-397014	6/196	0.0694807	KCNK10;TPM3;SRI;NOS1;TBX5;HIPK2
TCF dependent signaling in response to WNT_Homo sapiens_R-HSA-201681	6/199	0.073821	SOX2;CUL3;AKT1;TCF4;LRP6;WNT4
Metabolism of vitamins and cofactors_Homo sapiens_R-HSA-196854	5/148	0.0775221	MMAB;MTHFR;ENPP1;MOCS1;SLC19A2
Signaling by FGFR3 in disease_Homo sapiens_R-HSA-5655332	2/22	0.0799152	KRAS;FGFR3
Signaling by FGFR3 point mutants in cancer_Homo sapiens_R-HSA-8853338	2/22	0.0799152	KRAS;FGFR3
CD28 dependent PI3K/Akt signaling_Homo sapiens_R-HSA-389357	2/22	0.0799152	AKT1;RICTOR
Pre-NOTCH Expression and Processing_Homo sapiens_R-HSA-1912422	3/57	0.0807264	CCND1;TP53;TNRC6B
Cell surface interactions at the vascular wall_Homo sapiens_R-HSA-202733	4/101	0.0809152	CD84;SLC16A1;CEACAM6;KRAS
Regulation of TP53 Activity through Acetylation_Homo sapiens_R-HSA-6804758	2/23	0.0854984	AKT1;TP53
The role of GTSE1 in G2/M progression after G2 checkpoint_Homo sapiens_R-HSA-8852276	3/59	0.0859428	CDKN1A;CDK1;TP53
SCF(Skp2)-mediated degradation of p27/p21_Homo sapiens_R-HSA-187577	3/59	0.0859428	CCNA2;CDKN1A;CCND1
DNA Damage/Telomere Stress Induced Senescence_Homo sapiens_R-HSA-2559586	3/59	0.0859428	CCNA2;CDKN1A;TP53
Post-translational protein modification_Homo sapiens_R-HSA-597592	11/521	0.0859428	NSF;PPP6C;DCTN5;MGAT4A;ST8SIA3;ST8SIA4;GCNT4;ANK3;BRCA1;TP53;NAPG
SLC-mediated transmembrane transport_Homo sapiens_R-HSA-425407	7/268	0.0869072	SLC24A4;SLC16A1;SLC9A8;SLC1A2;SRI;SLC6A1;SLC7A2
Signaling by Interleukins_Homo sapiens_R-HSA-449147	9/392	0.0869995	SPRED1;ERBB3;CUL3;RASA1;KRAS;IQGAP1;KSR2;CBL;FGFR3
TP53 Regulates Transcription of DNA Repair Genes_Homo sapiens_R-HSA-6796648	3/61	0.091727	CHEK1;BRCA1;TP53
G0 and Early G1_Homo sapiens_R-HSA-1538133	2/25	0.095808	CCNA2;CDK1
p53-Dependent G1 DNA Damage Response_Homo sapiens_R-HSA-69563	3/63	0.0981155	CCNA2;CDKN1A;TP53
p53-Dependent G1/S DNA damage checkpoint_Homo sapiens_R-HSA-69580	3/63	0.0981155	CCNA2;CDKN1A;TP53

## Sheet:  Red
REACTOME 2016- Biological Pathways (2 enriched pathways)
Term	Overlap	Adjusted P value	Genes
Insulin-like Growth Factor-2 mRNA Binding Proteins (IGF2BPs/IMPs/VICKZs) bind RNA_Homo sapiens_R-HSA-428359	3/8	0.0157735	IGF2BP1;IGF2BP3;IGF2BP2
Formation of Senescence-Associated Heterochromatin Foci (SAHF)_Homo sapiens_R-HSA-2559584	3/17	0.0905812	CDKN1A;HMGA1;HMGA2

## Sheet:  Pink
REACTOME 2016- Biological Pathways ( 102 enriched pathways)
Term	Overlap	Adjusted P value	Genes
Oncogene Induced Senescence_Homo sapiens_R-HSA-2559585	8/32	7.5428e-05	CDK6;AGO4;AGO1;MAPK1;E2F3;ETS1;TNRC6A;TNRC6B
Developmental Biology_Homo sapiens_R-HSA-1266738	36/786	0.000288414	ROBO2;NRP1;ROCK1;YWHAB;IRS1;ADAM22;HNF4G;CACNA1C;ROBO1;SPRED2;ALCAM;ERBB3;CHL1;MAPK1;WNT1;EPHA5;PRNP;WNT10B;CDK19;ANK3;KLF4;ACVR2B;DKK1;MAFB;KLF5;COL4A1;TBL1XR1;PSMC2;KIT;CNTN2;TCF4;ITGA5;PPARA;CD24;SOS2;CDK5R1
Post-transcriptional silencing by small RNAs_Homo sapiens_R-HSA-426496	4/7	0.0010273	AGO4;AGO1;TNRC6A;TNRC6B
Cellular Senescence_Homo sapiens_R-HSA-2559583	13/161	0.00129094	UBE2C;UBE2D1;TERF2;ETS1;CDK6;CCNE2;AGO4;AGO1;CDC27;MAPK1;E2F3;TNRC6A;TNRC6B
Downstream signaling events of B Cell Receptor (BCR)_Homo sapiens_R-HSA-1168372	14/192	0.00129094	CHUK;IRS1;PTEN;PIK3R3;IKBKB;ERBB3;AGO4;AGO1;PSMC2;KIT;MAPK1;TNRC6A;SKP1;TNRC6B
PI-3K cascade:FGFR1_Homo sapiens_R-HSA-5654689	11/122	0.00129094	ERBB3;CHUK;IRS1;AGO4;AGO1;KIT;PTEN;PIK3R3;MAPK1;TNRC6A;TNRC6B
PI-3K cascade:FGFR2_Homo sapiens_R-HSA-5654695	11/122	0.00129094	ERBB3;CHUK;IRS1;AGO4;AGO1;KIT;PTEN;PIK3R3;MAPK1;TNRC6A;TNRC6B
PI-3K cascade:FGFR3_Homo sapiens_R-HSA-5654710	11/122	0.00129094	ERBB3;CHUK;IRS1;AGO4;AGO1;KIT;PTEN;PIK3R3;MAPK1;TNRC6A;TNRC6B
PI-3K cascade:FGFR4_Homo sapiens_R-HSA-5654720	11/122	0.00129094	ERBB3;CHUK;IRS1;AGO4;AGO1;KIT;PTEN;PIK3R3;MAPK1;TNRC6A;TNRC6B
PI3K events in ERBB4 signaling_Homo sapiens_R-HSA-1250342	11/122	0.00129094	ERBB3;CHUK;IRS1;AGO4;AGO1;KIT;PTEN;PIK3R3;MAPK1;TNRC6A;TNRC6B
PIP3 activates AKT signaling_Homo sapiens_R-HSA-1257604	11/122	0.00129094	ERBB3;CHUK;IRS1;AGO4;AGO1;KIT;PTEN;PIK3R3;MAPK1;TNRC6A;TNRC6B
GAB1 signalosome_Homo sapiens_R-HSA-180292	11/125	0.00137322	ERBB3;CHUK;IRS1;AGO4;AGO1;KIT;PTEN;PIK3R3;MAPK1;TNRC6A;TNRC6B
PI3K/AKT activation_Homo sapiens_R-HSA-198203	11/125	0.00137322	ERBB3;CHUK;IRS1;AGO4;AGO1;KIT;PTEN;PIK3R3;MAPK1;TNRC6A;TNRC6B
N-glycan antennae elongation in the medial/trans-Golgi_Homo sapiens_R-HSA-975576	5/26	0.00541805	FUT8;MGAT4A;ST8SIA3;B4GALT6;B4GALT5
Pre-NOTCH Transcription and Translation_Homo sapiens_R-HSA-1912408	6/41	0.00541805	CCND1;AGO4;AGO1;E2F3;TNRC6A;TNRC6B
Axon guidance_Homo sapiens_R-HSA-422475	23/515	0.00553672	EPHA5;ROBO2;NRP1;PRNP;ROCK1;IRS1;YWHAB;ANK3;CACNA1C;ROBO1;SPRED2;ALCAM;ERBB3;CHL1;COL4A1;PSMC2;KIT;CNTN2;MAPK1;ITGA5;CD24;SOS2;CDK5R1
Signaling by the B Cell Receptor (BCR)_Homo sapiens_R-HSA-983705	14/233	0.00592919	CHUK;IRS1;PTEN;PIK3R3;IKBKB;ERBB3;AGO4;AGO1;PSMC2;KIT;MAPK1;TNRC6A;SKP1;TNRC6B
N-Glycan antennae elongation_Homo sapiens_R-HSA-975577	4/15	0.00592919	MGAT4A;ST8SIA3;B4GALT6;B4GALT5
Cellular responses to stress_Homo sapiens_R-HSA-2262752	18/367	0.0083158	MTMR3;NUP133;UBE2C;UBE2D1;CYBB;TERF2;ETS1;MAP1LC3B;CDK6;CCNE2;AGO4;AGO1;CDC27;MAPK1;E2F3;ATG7;TNRC6A;TNRC6B
Role of LAT2/NTAL/LAB on calcium mobilization_Homo sapiens_R-HSA-2730905	11/162	0.00913576	ERBB3;CHUK;IRS1;AGO4;AGO1;KIT;PTEN;PIK3R3;MAPK1;TNRC6A;TNRC6B
Adaptive Immune System_Homo sapiens_R-HSA-1280218	29/762	0.00913576	CD274;CUL5;IRS1;SAR1B;YWHAB;UBA6;PTEN;UBE2D1;PIK3R3;IKBKB;ERBB3;CTSL;CDC27;MAPK1;ATG7;SKP1;CTSA;CHUK;UBE2C;CYBB;MEX3C;HLA-G;AGO4;AGO1;PSMC2;KIT;ULBP1;TNRC6A;TNRC6B
Conversion from APC/C:Cdc20 to APC/C:Cdh1 in late anaphase_Homo sapiens_R-HSA-176407	4/19	0.0129833	UBE2C;CDC27;UBE2D1;CDC14A
Synthesis of PIPs at the plasma membrane_Homo sapiens_R-HSA-1660499	5/34	0.0131856	MTMR3;SYNJ1;PTEN;PIK3R3;PIK3C2A
L1CAM interactions_Homo sapiens_R-HSA-373760	8/96	0.0140123	NRP1;ALCAM;CHL1;CNTN2;MAPK1;ITGA5;ANK3;CD24
Assembly of collagen fibrils and other multimeric structures_Homo sapiens_R-HSA-2022090	6/54	0.015226	MMP13;COL2A1;DST;CTSL;COL4A1;ITGA6
Pre-NOTCH Expression and Processing_Homo sapiens_R-HSA-1912422	6/57	0.0195546	CCND1;AGO4;AGO1;E2F3;TNRC6A;TNRC6B
Transcriptional regulation of white adipocyte differentiation_Homo sapiens_R-HSA-381340	7/79	0.0195546	WNT10B;CDK19;KLF5;TBL1XR1;WNT1;PPARA;KLF4
PI Metabolism_Homo sapiens_R-HSA-1483255	6/60	0.0239911	MTMR3;SYNJ1;PTEN;PIK3R3;PNPLA6;PIK3C2A
Ca2+ pathway_Homo sapiens_R-HSA-4086398	6/61	0.0241092	FZD3;AGO4;AGO1;FZD6;TNRC6A;TNRC6B
Transport to the Golgi and subsequent modification_Homo sapiens_R-HSA-948021	10/162	0.0241092	LMAN1;FUT8;SAR1B;MGAT4A;ST8SIA3;TGFA;ANK3;TMED7;B4GALT6;B4GALT5
MAPK family signaling cascades_Homo sapiens_R-HSA-5683057	14/284	0.0241092	IRS1;YWHAB;MMP10;CDC14A;SPRED2;ERBB3;AGO4;AGO1;PSMC2;KIT;MAPK1;IL6ST;TNRC6A;TNRC6B
BMAL1:CLOCK,NPAS2 activates circadian gene expression_Homo sapiens_R-HSA-1368108	5/42	0.0256389	TBL1XR1;SERPINE1;NRIP1;SIK1;PPARA
Circadian Clock_Homo sapiens_R-HSA-400253	6/63	0.0263622	TBL1XR1;SERPINE1;NRIP1;SIK1;PPARA;SKP1
Fc epsilon receptor (FCERI) signaling_Homo sapiens_R-HSA-2454202	17/395	0.0297365	CHUK;IRS1;YWHAB;PTEN;UBE2D1;PIK3R3;IKBKB;SPRED2;ERBB3;AGO4;AGO1;PSMC2;KIT;MAPK1;TNRC6A;TNRC6B;SKP1
Signaling by ERBB4_Homo sapiens_R-HSA-1236394	15/330	0.032149	CHUK;IRS1;YWHAB;PTEN;PIK3R3;SPRED2;ERBB3;AGO4;AGO1;PSMC2;KIT;MAPK1;TNRC6A;SKP1;TNRC6B
Oxidative Stress Induced Senescence_Homo sapiens_R-HSA-2559580	7/91	0.0338458	CDK6;AGO4;AGO1;MAPK1;E2F3;TNRC6A;TNRC6B
MAPK6/MAPK4 signaling_Homo sapiens_R-HSA-5687128	7/92	0.0350826	AGO4;AGO1;PSMC2;MMP10;TNRC6A;CDC14A;TNRC6B
Signaling by NOTCH_Homo sapiens_R-HSA-157118	8/122	0.0423017	CCND1;TBL1XR1;AGO4;AGO1;E2F3;TNRC6A;SKP1;TNRC6B
Signalling by NGF_Homo sapiens_R-HSA-166520	18/450	0.0424331	CHUK;IRS1;YWHAB;PTEN;PIK3R3;RTN4;IKBKB;SPRED2;BCL2L11;ERBB3;AGO4;AGO1;PSMC2;KIT;MAPK1;SOS2;TNRC6A;TNRC6B
Keratan sulfate/keratin metabolism_Homo sapiens_R-HSA-1638074	4/32	0.0547096	CHST6;B4GALT6;GNS;B4GALT5
MAP3K8 (TPL2)-dependent MAPK1/3 activation_Homo sapiens_R-HSA-5684264	3/16	0.0565574	IKBKB;CHUK;SKP1
Signaling by SCF-KIT_Homo sapiens_R-HSA-1433557	14/325	0.0616377	CHUK;IRS1;YWHAB;PTEN;PIK3R3;SPRED2;ERBB3;AGO4;AGO1;PSMC2;KIT;MAPK1;TNRC6A;TNRC6B
Regulation of cholesterol biosynthesis by SREBP (SREBF)_Homo sapiens_R-HSA-1655829	5/55	0.0616377	HMGCS1;TBL1XR1;SAR1B;MTF1;PPARA
Signaling by PDGF_Homo sapiens_R-HSA-186797	15/364	0.0616377	CHUK;IRS1;YWHAB;PTEN;PIK3R3;SPRED2;ERBB3;AGO4;COL4A1;AGO1;PSMC2;KIT;MAPK1;TNRC6A;TNRC6B
Downstream signaling of activated FGFR2_Homo sapiens_R-HSA-5654696	14/329	0.0616377	CHUK;IRS1;YWHAB;PTEN;PIK3R3;SPRED2;ERBB3;AGO4;AGO1;PSMC2;KIT;MAPK1;TNRC6A;TNRC6B
Downstream signaling of activated FGFR3_Homo sapiens_R-HSA-5654708	14/329	0.0616377	CHUK;IRS1;YWHAB;PTEN;PIK3R3;SPRED2;ERBB3;AGO4;AGO1;PSMC2;KIT;MAPK1;TNRC6A;TNRC6B
Downstream signaling of activated FGFR4_Homo sapiens_R-HSA-5654716	14/329	0.0616377	CHUK;IRS1;YWHAB;PTEN;PIK3R3;SPRED2;ERBB3;AGO4;AGO1;PSMC2;KIT;MAPK1;TNRC6A;TNRC6B
Downstream signaling of activated FGFR1_Homo sapiens_R-HSA-5654687	14/332	0.0628068	CHUK;IRS1;YWHAB;PTEN;PIK3R3;SPRED2;ERBB3;AGO4;AGO1;PSMC2;KIT;MAPK1;TNRC6A;TNRC6B
Signaling by FGFR4_Homo sapiens_R-HSA-5654743	14/332	0.0628068	CHUK;IRS1;YWHAB;PTEN;PIK3R3;SPRED2;ERBB3;AGO4;AGO1;PSMC2;KIT;MAPK1;TNRC6A;TNRC6B
Peptide hormone metabolism_Homo sapiens_R-HSA-2980736	6/81	0.0628068	ATP6AP2;MYO5A;INHBB;IGF1;KLF4;VAMP2
Signaling by FGFR3_Homo sapiens_R-HSA-5654741	14/333	0.0631648	CHUK;IRS1;YWHAB;PTEN;PIK3R3;SPRED2;ERBB3;AGO4;AGO1;PSMC2;KIT;MAPK1;TNRC6A;TNRC6B
Signaling by FGFR1_Homo sapiens_R-HSA-5654736	14/336	0.0662942	CHUK;IRS1;YWHAB;PTEN;PIK3R3;SPRED2;ERBB3;AGO4;AGO1;PSMC2;KIT;MAPK1;TNRC6A;TNRC6B
NCAM1 interactions_Homo sapiens_R-HSA-419037	4/37	0.0662942	PRNP;COL4A1;CNTN2;CACNA1C
TP53 Regulates Metabolic Genes_Homo sapiens_R-HSA-5628897	6/84	0.0662942	AGO4;YWHAB;AGO1;PTEN;TNRC6A;TNRC6B
Phosphorylation of the APC/C_Homo sapiens_R-HSA-176412	3/19	0.0662942	UBE2C;CDC27;UBE2D1
Class I MHC mediated antigen processing & presentation_Homo sapiens_R-HSA-983169	13/305	0.0662942	CUL5;UBE2C;SAR1B;UBA6;UBE2D1;CYBB;MEX3C;HLA-G;CTSL;PSMC2;CDC27;ATG7;SKP1
Downstream signal transduction_Homo sapiens_R-HSA-186763	14/341	0.0662942	CHUK;IRS1;YWHAB;PTEN;PIK3R3;SPRED2;ERBB3;AGO4;AGO1;PSMC2;KIT;MAPK1;TNRC6A;TNRC6B
APC/C-mediated degradation of cell cycle proteins_Homo sapiens_R-HSA-174143	6/85	0.0662942	UBE2C;PSMC2;CDC27;UBE2D1;CDC14A;SKP1
Regulation of mitotic cell cycle_Homo sapiens_R-HSA-453276	6/85	0.0662942	UBE2C;PSMC2;CDC27;UBE2D1;CDC14A;SKP1
Collagen formation_Homo sapiens_R-HSA-1474290	6/85	0.0662942	MMP13;COL2A1;DST;CTSL;COL4A1;ITGA6
Cyclin D associated events in G1_Homo sapiens_R-HSA-69231	4/38	0.0663639	CDK6;CCND1;E2F3;SKP1
G1 Phase_Homo sapiens_R-HSA-69236	4/38	0.0663639	CDK6;CCND1;E2F3;SKP1
DAP12 signaling_Homo sapiens_R-HSA-2424491	14/344	0.0674382	CHUK;IRS1;YWHAB;PTEN;PIK3R3;SPRED2;ERBB3;AGO4;AGO1;PSMC2;KIT;MAPK1;TNRC6A;TNRC6B
Beta-catenin independent WNT signaling_Homo sapiens_R-HSA-3858494	8/144	0.0674382	FZD3;AGO4;AGO1;PSMC2;FZD6;WNT1;TNRC6A;TNRC6B
Inactivation of APC/C via direct inhibition of the APC/C complex_Homo sapiens_R-HSA-141430	3/20	0.0674382	UBE2C;CDC27;UBE2D1
Inhibition of the proteolytic activity of APC/C required for the onset of anaphase by mitotic spindle checkpoint components_Homo sapiens_R-HSA-141405	3/20	0.0674382	UBE2C;CDC27;UBE2D1
Collagen degradation_Homo sapiens_R-HSA-1442490	4/39	0.0674382	MMP13;MMP15;CTSL;MMP10
Mitotic Spindle Checkpoint_Homo sapiens_R-HSA-69618	3/21	0.0731268	UBE2C;CDC27;UBE2D1
RIP-mediated NFkB activation via ZBP1_Homo sapiens_R-HSA-1810476	3/21	0.0731268	IKBKB;CHUK;HMGB1
Signal transduction by L1_Homo sapiens_R-HSA-445144	3/21	0.0731268	NRP1;MAPK1;ITGA5
Negative regulation of the PI3K/AKT network_Homo sapiens_R-HSA-199418	6/90	0.0731268	ERBB3;IRS1;KIT;PTEN;PIK3R3;MAPK1
IkBA variant leads to EDA-ID_Homo sapiens_R-HSA-5603029	2/7	0.0731268	IKBKB;CHUK
Extracellular matrix organization_Homo sapiens_R-HSA-1474244	12/283	0.0753107	COL2A1;MMP13;DST;MMP15;CTSL;COL4A1;SERPINE1;ITGA11;ITGA6;ITGA5;BMP7;MMP10
Signaling by EGFR_Homo sapiens_R-HSA-177929	14/355	0.0753107	CHUK;IRS1;YWHAB;PTEN;PIK3R3;SPRED2;ERBB3;AGO4;AGO1;PSMC2;KIT;MAPK1;TNRC6A;TNRC6B
Activation of gene expression by SREBF (SREBP)_Homo sapiens_R-HSA-2426168	4/42	0.0784753	HMGCS1;TBL1XR1;MTF1;PPARA
DAP12 interactions_Homo sapiens_R-HSA-2172127	14/359	0.0805195	CHUK;IRS1;YWHAB;PTEN;PIK3R3;SPRED2;ERBB3;AGO4;AGO1;PSMC2;KIT;MAPK1;TNRC6A;TNRC6B
Signaling by FGFR2_Homo sapiens_R-HSA-5654738	14/361	0.0832237	CHUK;IRS1;YWHAB;PTEN;PIK3R3;SPRED2;ERBB3;AGO4;AGO1;PSMC2;KIT;MAPK1;TNRC6A;TNRC6B
APC/C:Cdc20 mediated degradation of Cyclin B_Homo sapiens_R-HSA-174048	3/23	0.0842777	UBE2C;CDC27;UBE2D1
Signaling by BMP_Homo sapiens_R-HSA-201451	3/23	0.0842777	GREM2;UBE2D1;ACVR2B
IKBKG deficiency causes anhidrotic ectodermal dysplasia with immunodeficiency (EDA-ID) (via TLR)_Homo sapiens_R-HSA-5603027	2/8	0.0844448	IKBKB;CHUK
BH3-only proteins associate with and inactivate anti-apoptotic BCL-2 members_Homo sapiens_R-HSA-111453	2/8	0.0844448	BCL2L11;BCL2
Signaling by FGFR_Homo sapiens_R-HSA-190236	14/366	0.0844448	CHUK;IRS1;YWHAB;PTEN;PIK3R3;SPRED2;ERBB3;AGO4;AGO1;PSMC2;KIT;MAPK1;TNRC6A;TNRC6B
MyD88-independent TLR3/TLR4 cascade_Homo sapiens_R-HSA-166166	6/97	0.0844448	IKBKB;CHUK;UBE2D1;MAPK1;HMGB1;SKP1
Toll Like Receptor 3 (TLR3) Cascade_Homo sapiens_R-HSA-168164	6/97	0.0844448	IKBKB;CHUK;UBE2D1;MAPK1;HMGB1;SKP1
TRIF-mediated TLR3/TLR4 signaling_Homo sapiens_R-HSA-937061	6/97	0.0844448	IKBKB;CHUK;UBE2D1;MAPK1;HMGB1;SKP1
IKK complex recruitment mediated by RIP1_Homo sapiens_R-HSA-937041	3/24	0.0844448	IKBKB;CHUK;UBE2D1
Growth hormone receptor signaling_Homo sapiens_R-HSA-982772	3/24	0.0844448	PTPN1;IRS1;MAPK1
TRAF6 mediated NF-kB activation_Homo sapiens_R-HSA-933542	3/24	0.0844448	IKBKB;CHUK;HMGB1
Asparagine N-linked glycosylation_Homo sapiens_R-HSA-446203	11/259	0.0844448	CTSA;LMAN1;FUT8;SAR1B;MGAT4A;ST8SIA3;TGFA;ANK3;TMED7;B4GALT6;B4GALT5
Signaling by Wnt_Homo sapiens_R-HSA-195721	12/295	0.0844448	WNT10B;FZD3;AGO4;AGO1;PSMC2;FZD6;TCF4;WNT1;DKK1;TNRC6A;SKP1;TNRC6B
Downstream TCR signaling_Homo sapiens_R-HSA-202424	6/99	0.0898504	IKBKB;CHUK;PSMC2;PTEN;UBE2D1;SKP1
APC-Cdc20 mediated degradation of Nek2A_Homo sapiens_R-HSA-179409	3/25	0.0898504	UBE2C;CDC27;UBE2D1
NGF signalling via TRKA from the plasma membrane_Homo sapiens_R-HSA-187037	14/374	0.0898504	CHUK;IRS1;YWHAB;PTEN;PIK3R3;SPRED2;ERBB3;AGO4;AGO1;PSMC2;KIT;MAPK1;TNRC6A;TNRC6B
TRAF6 Mediated Induction of proinflammatory cytokines_Homo sapiens_R-HSA-168180	5/72	0.0898504	IKBKB;CHUK;MAPK1;HMGB1;SKP1
MAPK1 (ERK2) activation_Homo sapiens_R-HSA-112411	2/9	0.0898504	MAPK1;IL6ST
Type I hemidesmosome assembly_Homo sapiens_R-HSA-446107	2/9	0.0898504	DST;ITGA6
CHL1 interactions_Homo sapiens_R-HSA-447041	2/9	0.0898504	NRP1;CHL1
Small interfering RNA (siRNA) biogenesis_Homo sapiens_R-HSA-426486	2/9	0.0898504	AGO4;AGO1
NCAM signaling for neurite out-growth_Homo sapiens_R-HSA-375165	11/266	0.0915517	PRNP;SPRED2;ERBB3;COL4A1;IRS1;YWHAB;PSMC2;KIT;CNTN2;MAPK1;CACNA1C
TAK1 activates NFkB by phosphorylation and activation of IKKs complex_Homo sapiens_R-HSA-445989	3/26	0.0919598	IKBKB;CHUK;HMGB1
ZBP1(DAI) mediated induction of type I IFNs_Homo sapiens_R-HSA-1606322	3/26	0.0919598	IKBKB;CHUK;HMGB1
TNFR1-induced NFkappaB signaling pathway_Homo sapiens_R-HSA-5357956	3/26	0.0919598	IKBKB;CHUK;USP4

## Sheet:  Purple
REACTOME 2016- Biological Pathways (22 enriched pathways)
Term	Overlap	Adjusted P value	Genes
Developmental Biology_Homo sapiens_R-HSA-1266738	37/786	0.0076087	KLB;SEMA5A;GSK3B;SHC1;EPAS1;PDGFA;ARRB2;FGF2;NEUROD1;GRIN2A;ACVR1C;PLXNA2;BNIP2;MAPK1;ITGAV;SCN3B;EPHA5;PRNP;MED1;SMAD4;SMAD3;SIAH1;RANBP9;UNC5C;PAX6;NR2F2;ARPC5;UNC5D;IL17RD;DNM3;KLF5;COL4A1;COL4A3;NF1;TCF4;KRAS;ARHGEF7
Axon guidance_Homo sapiens_R-HSA-422475	26/515	0.0270764	SEMA5A;KLB;GSK3B;SHC1;PDGFA;ARRB2;FGF2;GRIN2A;PLXNA2;MAPK1;ITGAV;SCN3B;EPHA5;PRNP;SIAH1;RANBP9;UNC5C;ARPC5;UNC5D;IL17RD;DNM3;COL4A1;COL4A3;NF1;KRAS;ARHGEF7
Downregulation of SMAD2/3:SMAD4 transcriptional activity_Homo sapiens_R-HSA-2173795	5/23	0.0316928	PPM1A;SMAD4;SMAD3;SKIL;TRIM33
Diseases of signal transduction_Homo sapiens_R-HSA-5663202	17/288	0.0341507	KLB;GSK3B;SMAD4;SMAD3;FZD4;SHC1;SEL1L;PDGFA;PIK3R3;PIK3R1;CBL;FGF2;HDAC9;ZMYM2;APC;CUX1;KRAS
Constitutive Signaling by EGFRvIII_Homo sapiens_R-HSA-5637810	4/15	0.0341507	SHC1;KRAS;PIK3R1;CBL
Signaling by EGFRvIII in Cancer_Homo sapiens_R-HSA-5637812	4/15	0.0341507	SHC1;KRAS;PIK3R1;CBL
Signal Transduction_Homo sapiens_R-HSA-162582	78/2465	0.0417812	KLB;GSK3B;DGKE;ARRB2;ARHGAP5;FGF2;CXCL5;CRKL;MYLK;PPP1CB;CCND1;GNRHR;ITGAV;DLAT;SOX6;CPT1A;RBFOX2;PPP1R12A;SSTR1;SSTR2;IL17RD;DNM3;PPM1A;SFPQ;COL4A1;COL4A3;GAS1;PGR;ARHGEF7;RHOQ;PAFAH1B1;RAPGEF4;KHDRBS2;CAB39;SHC1;EPAS1;SEL1L;PDGFA;PIK3R3;PIK3R1;CBL;HDAC9;NSL1;RHOBTB1;GNA13;FGD4;MC2R;PDE11A;GRIN2A;ACVR1C;CNR1;ADRBK2;RDH10;PDGFC;P2RY1;MAPK1;TAC3;SKIL;SCAI;FZD3;SMAD4;SMAD3;HTR1F;FZD4;ARHGAP28;ARPC5…
Regulation of signaling by CBL_Homo sapiens_R-HSA-912631	4/18	0.0417812	PIK3R3;PIK3R1;CBL;CRKL
Oncogene Induced Senescence_Homo sapiens_R-HSA-2559585	5/32	0.0417812	CDK6;E2F2;MAPK1;ETS1;TNRC6B
Signaling by PTK6_Homo sapiens_R-HSA-8848021	7/67	0.0417812	SFPQ;KHDRBS2;CCND1;EPAS1;NF1;KRAS;CBL
Constitutive Signaling by Ligand-Responsive EGFR Cancer Variants_Homo sapiens_R-HSA-1236382	4/19	0.0417812	SHC1;KRAS;PIK3R1;CBL
Signaling by EGFR in Cancer_Homo sapiens_R-HSA-1643713	4/19	0.0417812	SHC1;KRAS;PIK3R1;CBL
Signaling by Ligand-Responsive EGFR Variants in Cancer_Homo sapiens_R-HSA-5637815	4/19	0.0417812	SHC1;KRAS;PIK3R1;CBL
Nuclear Receptor transcription pathway_Homo sapiens_R-HSA-383280	6/51	0.0471512	MED1;NR1D2;PGR;RORA;RORB;NR3C2
Signaling by TGF-beta Receptor Complex_Homo sapiens_R-HSA-170834	7/73	0.0558436	PPP1CB;PPM1A;SMAD4;SMAD3;CBL;SKIL;TRIM33
Signaling by PDGF_Homo sapiens_R-HSA-186797	18/364	0.0558436	KLB;GSK3B;SHC1;PDGFA;PIK3R3;PIK3R1;ARRB2;IL17RD;FGF2;CRKL;GRIN2A;COL4A1;PDGFC;COL4A3;NF1;MAPK1;KRAS;TNRC6B
Signaling by FGFR1 in disease_Homo sapiens_R-HSA-5655302	5/38	0.063867	ZMYM2;CUX1;KRAS;PIK3R1;FGF2
SHC-mediated cascade:FGFR4_Homo sapiens_R-HSA-5654719	4/23	0.0643676	KLB;SHC1;KRAS;FGF2
Interleukin-3, 5 and GM-CSF signaling_Homo sapiens_R-HSA-512988	14/261	0.0778274	KLB;SHC1;PDGFA;PIK3R3;PIK3R1;ARRB2;IL17RD;CBL;FGF2;CRKL;GRIN2A;NF1;MAPK1;KRAS
Signaling by ERBB4_Homo sapiens_R-HSA-1236394	16/330	0.0960141	KLB;GSK3B;SHC1;PDGFA;PIK3R3;PIK3R1;ARRB2;IL17RD;FGF2;GRIN2A;NEDD4;NF1;MAPK1;PGR;KRAS;TNRC6B
Signaling by Activin_Homo sapiens_R-HSA-1502540	3/13	0.0960141	SMAD4;SMAD3;ACVR1C
Transcriptional activity of SMAD2/SMAD3:SMAD4 heterotrimer_Homo sapiens_R-HSA-2173793	5/44	0.0960141	PPM1A;SMAD4;SMAD3;SKIL;TRIM33

## Sheet:  Green Yellow
REACTOME 2016- Biological Pathways (66 enriched pathways)
Term	Overlap	Adjusted P value	Genes
Adaptive Immune System_Homo sapiens_R-HSA-1280218	19/762	0.00483459	CHUK;UBA6;ITPR1;CYBB;FRS2;PTPRJ;KIF23;PIK3R1;YWHAZ;FYB;UBE2J1;NRG4;ERBB4;AP1S3;ATG7;PRKG1;CD200;PAG1;TNRC6B
GAB1 signalosome_Homo sapiens_R-HSA-180292	7/125	0.0155167	CHUK;NRG4;ERBB4;FRS2;PIK3R1;PAG1;TNRC6B
Immune System_Homo sapiens_R-HSA-168256	26/1547	0.0176869	UBA6;ITPR1;PTPRJ;ADCY1;PIK3R1;FYB;UBE2J1;MAPK9;ERBB4;AP1S3;ATG7;PRKG1;PAG1;MYO10;CHUK;CYBB;FRS2;KIF23;KSR2;PRLR;YWHAZ;NRG4;MYH9;TRIM38;CD200;TNRC6B
Nuclear signaling by ERBB4_Homo sapiens_R-HSA-1251985	4/39	0.0176869	NRG4;ERBB4;PRLR;GFAP
PI3K events in ERBB2 signaling_Homo sapiens_R-HSA-1963642	3/16	0.0176869	NRG4;ERBB4;PIK3R1
cGMP effects_Homo sapiens_R-HSA-418457	3/18	0.0176869	ITPR1;PDE3A;PRKG1
PI-3K cascade:FGFR1_Homo sapiens_R-HSA-5654689	6/122	0.0176869	CHUK;NRG4;ERBB4;FRS2;PIK3R1;TNRC6B
PI-3K cascade:FGFR2_Homo sapiens_R-HSA-5654695	6/122	0.0176869	CHUK;NRG4;ERBB4;FRS2;PIK3R1;TNRC6B
PI-3K cascade:FGFR3_Homo sapiens_R-HSA-5654710	6/122	0.0176869	CHUK;NRG4;ERBB4;FRS2;PIK3R1;TNRC6B
PI-3K cascade:FGFR4_Homo sapiens_R-HSA-5654720	6/122	0.0176869	CHUK;NRG4;ERBB4;FRS2;PIK3R1;TNRC6B
PI3K events in ERBB4 signaling_Homo sapiens_R-HSA-1250342	6/122	0.0176869	CHUK;NRG4;ERBB4;FRS2;PIK3R1;TNRC6B
PIP3 activates AKT signaling_Homo sapiens_R-HSA-1257604	6/122	0.0176869	CHUK;NRG4;ERBB4;FRS2;PIK3R1;TNRC6B
PI3K/AKT activation_Homo sapiens_R-HSA-198203	6/125	0.0185822	CHUK;NRG4;ERBB4;FRS2;PIK3R1;TNRC6B
Signaling by EGFR_Homo sapiens_R-HSA-177929	10/355	0.019344	CHUK;NRG4;ERBB4;ITPR1;FRS2;ADCY1;PIK3R1;KSR2;PAG1;TNRC6B
PI3K/AKT Signaling in Cancer_Homo sapiens_R-HSA-2219528	5/86	0.0202307	CHUK;NRG4;ERBB4;FRS2;PIK3R1
Signaling by PDGF_Homo sapiens_R-HSA-186797	10/364	0.0205349	CHUK;NRG4;ERBB4;ITPR1;FRS2;PLG;ADCY1;PIK3R1;KSR2;TNRC6B
NGF signalling via TRKA from the plasma membrane_Homo sapiens_R-HSA-187037	10/374	0.0237821	NTRK2;CHUK;NRG4;ERBB4;ITPR1;FRS2;ADCY1;PIK3R1;KSR2;TNRC6B
Nitric oxide stimulates guanylate cyclase_Homo sapiens_R-HSA-392154	3/25	0.0267832	PDE3A;ITPR1;PRKG1
Downstream signaling of activated FGFR2_Homo sapiens_R-HSA-5654696	9/329	0.0267832	CHUK;NRG4;ERBB4;ITPR1;FRS2;ADCY1;PIK3R1;KSR2;TNRC6B
Downstream signaling of activated FGFR3_Homo sapiens_R-HSA-5654708	9/329	0.0267832	CHUK;NRG4;ERBB4;ITPR1;FRS2;ADCY1;PIK3R1;KSR2;TNRC6B
Downstream signaling of activated FGFR4_Homo sapiens_R-HSA-5654716	9/329	0.0267832	CHUK;NRG4;ERBB4;ITPR1;FRS2;ADCY1;PIK3R1;KSR2;TNRC6B
Signaling by ERBB4_Homo sapiens_R-HSA-1236394	9/330	0.0267832	CHUK;NRG4;ERBB4;FRS2;PIK3R1;KSR2;PRLR;GFAP;TNRC6B
Downstream signaling of activated FGFR1_Homo sapiens_R-HSA-5654687	9/332	0.0267832	CHUK;NRG4;ERBB4;ITPR1;FRS2;ADCY1;PIK3R1;KSR2;TNRC6B
Signaling by FGFR4_Homo sapiens_R-HSA-5654743	9/332	0.0267832	CHUK;NRG4;ERBB4;ITPR1;FRS2;ADCY1;PIK3R1;KSR2;TNRC6B
Signaling by FGFR3_Homo sapiens_R-HSA-5654741	9/333	0.0267832	CHUK;NRG4;ERBB4;ITPR1;FRS2;ADCY1;PIK3R1;KSR2;TNRC6B
Constitutive Signaling by Aberrant PI3K in Cancer_Homo sapiens_R-HSA-2219530	4/61	0.0267832	NRG4;ERBB4;FRS2;PIK3R1
Signaling by FGFR1_Homo sapiens_R-HSA-5654736	9/336	0.0269277	CHUK;NRG4;ERBB4;ITPR1;FRS2;ADCY1;PIK3R1;KSR2;TNRC6B
Downstream signal transduction_Homo sapiens_R-HSA-186763	9/341	0.0287346	CHUK;NRG4;ERBB4;ITPR1;FRS2;ADCY1;PIK3R1;KSR2;TNRC6B
DAP12 signaling_Homo sapiens_R-HSA-2424491	9/344	0.0294545	CHUK;NRG4;ERBB4;ITPR1;FRS2;ADCY1;PIK3R1;KSR2;TNRC6B
Role of LAT2/NTAL/LAB on calcium mobilization_Homo sapiens_R-HSA-2730905	6/162	0.0309218	CHUK;NRG4;ERBB4;FRS2;PIK3R1;TNRC6B
DAP12 interactions_Homo sapiens_R-HSA-2172127	9/359	0.036538	CHUK;NRG4;ERBB4;ITPR1;FRS2;ADCY1;PIK3R1;KSR2;TNRC6B
Signaling by FGFR2_Homo sapiens_R-HSA-5654738	9/361	0.036538	CHUK;NRG4;ERBB4;ITPR1;FRS2;ADCY1;PIK3R1;KSR2;TNRC6B
TCR signaling_Homo sapiens_R-HSA-202403	5/118	0.036538	CHUK;PTPRJ;PIK3R1;PAG1;FYB
Signaling by the B Cell Receptor (BCR)_Homo sapiens_R-HSA-983705	7/233	0.036538	CHUK;NRG4;ERBB4;ITPR1;FRS2;PIK3R1;TNRC6B
Signaling by FGFR_Homo sapiens_R-HSA-190236	9/366	0.036538	CHUK;NRG4;ERBB4;ITPR1;FRS2;ADCY1;PIK3R1;KSR2;TNRC6B
Signaling by FGFR3 fusions in cancer_Homo sapiens_R-HSA-8853334	2/10	0.036538	FRS2;PIK3R1
GP1b-IX-V activation signalling_Homo sapiens_R-HSA-430116	2/10	0.036538	PIK3R1;YWHAZ
Signalling by NGF_Homo sapiens_R-HSA-166520	10/450	0.0415643	NTRK2;CHUK;NRG4;ERBB4;ITPR1;FRS2;ADCY1;KSR2;PIK3R1;TNRC6B
Signaling by FGFR4 in disease_Homo sapiens_R-HSA-5655291	2/11	0.0420668	FRS2;PIK3R1
Signaling by FGFR1 in disease_Homo sapiens_R-HSA-5655302	3/38	0.0420668	ZMYM2;FRS2;PIK3R1
Fc epsilon receptor (FCERI) signaling_Homo sapiens_R-HSA-2454202	9/395	0.0500599	MAPK9;CHUK;NRG4;ERBB4;ITPR1;FRS2;KSR2;PIK3R1;TNRC6B
PI5P, PP2A and IER3 Regulate PI3K/AKT Signaling_Homo sapiens_R-HSA-6811558	4/83	0.0500599	NRG4;ERBB4;FRS2;PIK3R1
Downstream signaling events of B Cell Receptor (BCR)_Homo sapiens_R-HSA-1168372	6/192	0.0500599	CHUK;NRG4;ERBB4;FRS2;PIK3R1;TNRC6B
TP53 Regulates Metabolic Genes_Homo sapiens_R-HSA-5628897	4/84	0.0508762	RHEB;YWHAZ;TP63;TNRC6B
ERBB2 Activates PTK6 Signaling_Homo sapiens_R-HSA-8847993	2/13	0.0512696	NRG4;ERBB4
Platelet homeostasis_Homo sapiens_R-HSA-418346	4/87	0.0551276	PDE3A;ITPR1;ATP2B1;PRKG1
Signaling by ERBB2_Homo sapiens_R-HSA-1227986	3/45	0.0578451	NRG4;ERBB4;PIK3R1
Negative regulation of the PI3K/AKT network_Homo sapiens_R-HSA-199418	4/90	0.058461	NRG4;ERBB4;FRS2;PIK3R1
Signal Transduction_Homo sapiens_R-HSA-162582	31/2465	0.058461	NOTCH2;ITPR1;PLG;GPR83;ADCY1;LRP2;PIK3R1;NR3C1;NSL1;ERBB4;GNRHR;PDE4B;RSPO3;PRKG1;PAG1;NTRK2;CHUK;CYBB;FRS2;KSR2;PRLR;YWHAZ;GFAP;MOB1B;NRG4;RHEB;PDE3A;MYH9;TCF4;PPP1R12B;TNRC6B
ERBB2 Regulates Cell Motility_Homo sapiens_R-HSA-6785631	2/15	0.0614753	NRG4;ERBB4
Transcriptional Regulation by TP53_Homo sapiens_R-HSA-3700989	8/348	0.0648297	RHEB;PLAGL1;MDM4;NBN;CDK13;YWHAZ;TP63;TNRC6B
GRB2 events in ERBB2 signaling_Homo sapiens_R-HSA-1963640	2/16	0.0659388	NRG4;ERBB4
Rap1 signalling_Homo sapiens_R-HSA-392517	2/16	0.0659388	YWHAZ;PRKG1
RHO GTPases Activate ROCKs_Homo sapiens_R-HSA-5627117	2/17	0.0729686	MYH9;PPP1R12B
SHC1 events in ERBB2 signaling_Homo sapiens_R-HSA-1250196	2/18	0.0786968	NRG4;ERBB4
Signaling by cytosolic FGFR1 fusion mutants_Homo sapiens_R-HSA-1839117	2/18	0.0786968	ZMYM2;PIK3R1
Cellular responses to stress_Homo sapiens_R-HSA-2262752	8/367	0.0786968	MAPK9;CDK6;RHEB;CYBB;NBN;ATP7A;ATG7;TNRC6B
RHO GTPases activate PAKs_Homo sapiens_R-HSA-5627123	2/21	0.0996095	MYH9;PPP1R12B
RHO GTPases activate PKNs_Homo sapiens_R-HSA-5625740	3/60	0.0996095	MYH9;PPP1R12B;YWHAZ
Generic Transcription Pathway_Homo sapiens_R-HSA-212436	13/812	0.0996095	NOTCH2;ZNF140;NR3C1;NR2C2;YWHAZ;RUNX2;RHEB;PLAGL1;MDM4;NBN;CDK13;TP63;TNRC6B
Ca2+ pathway_Homo sapiens_R-HSA-4086398	3/61	0.0996095	ITPR1;PRKG1;TNRC6B
Hemostasis_Homo sapiens_R-HSA-109582	10/552	0.0996095	MAFG;ITPR1;PDE3A;MFN2;PLG;KIF23;PIK3R1;ATP2B1;YWHAZ;PRKG1
Signaling by FGFR3 in disease_Homo sapiens_R-HSA-5655332	2/22	0.0996095	FRS2;PIK3R1
Signaling by FGFR3 point mutants in cancer_Homo sapiens_R-HSA-8853338	2/22	0.0996095	FRS2;PIK3R1
Nephrin interactions_Homo sapiens_R-HSA-373753	2/22	0.0996095	CASK;PIK3R1
Diseases associated with O-glycosylation of proteins_Homo sapiens_R-HSA-3906995	3/62	0.0996095	SEMA5A;NOTCH2;THSD7A

## Sheet:  Salmon
REACTOME 2016- Biological Pathways (46 enriched pathways)
Term	Overlap	Adjusted P value	Genes
Signaling by ERBB4_Homo sapiens_R-HSA-1236394	14/330	0.0414179	PAQR3;FN1;MTOR;SPRED1;CXCL12;PPP2R5E;ERBB4;NEDD4;RASA1;MDM2;NF1;PIP5K1B;TAB2;TNRC6B
Transport of inorganic cations/anions and amino acids/oligopeptides_Homo sapiens_R-HSA-425393	7/99	0.068803	SLC9A2;SLC24A2;SLC6A6;SLC38A1;SLC20A2;SLC1A2;SLC7A11
Response to elevated platelet cytosolic Ca2+_Homo sapiens_R-HSA-76005	7/110	0.069954	PRKCB;APLP2;HGF;PCDH7;FN1;PHACTR2;IGF1
Signalling by NGF_Homo sapiens_R-HSA-166520	15/450	0.069954	YWHAE;KIDINS220;PAQR3;FN1;MTOR;NET1;SPRED1;PPP2R5E;ERBB4;RASA1;MDM2;NF1;ARHGEF3;PIP5K1B;TNRC6B
Signaling by SCF-KIT_Homo sapiens_R-HSA-1433557	12/325	0.069954	SPRED1;YES1;PPP2R5E;ERBB4;RASA1;PAQR3;FN1;MDM2;NF1;PIP5K1B;MTOR;TNRC6B
Developmental Biology_Homo sapiens_R-HSA-1266738	21/786	0.069954	YES1;KMT2C;SDC2;PAQR3;FN1;ADAM22;UNC5C;HNF1B;SEMA3E;ACVR2B;ACVR2A;SPRED1;PPP2R5E;ERBB4;RASA1;NF1;PLIN1;MET;PAK4;CLASP2;KDM6A
Fc epsilon receptor (FCERI) signaling_Homo sapiens_R-HSA-2454202	13/395	0.069954	PAQR3;FN1;FOS;MTOR;SPRED1;PPP2R5E;ERBB4;RASA1;MDM2;NF1;PIP5K1B;TAB2;TNRC6B
Signaling by PTK6_Homo sapiens_R-HSA-8848021	5/67	0.069954	SPRED1;ERBB4;RASA1;LRRK2;NF1
Signaling by Insulin receptor_Homo sapiens_R-HSA-74752	11/311	0.069954	ATP6V1A;SPRED1;PRKAA2;PPP2R5E;ERBB4;RASA1;PAQR3;ATP6V1B2;FN1;NF1;MTOR
Platelet degranulation_Homo sapiens_R-HSA-114608	6/105	0.069954	APLP2;HGF;PCDH7;FN1;PHACTR2;IGF1
SLC-mediated transmembrane transport_Homo sapiens_R-HSA-425407	10/268	0.069954	SLC9A2;SLC24A2;SLC5A7;SLC6A6;SLC38A1;SLC22A15;SLC20A2;SLC33A1;SLC1A2;SLC7A11
NGF signalling via TRKA from the plasma membrane_Homo sapiens_R-HSA-187037	12/374	0.069954	SPRED1;KIDINS220;PPP2R5E;ERBB4;RASA1;PAQR3;FN1;MDM2;NF1;PIP5K1B;MTOR;TNRC6B
Downstream signaling of activated FGFR2_Homo sapiens_R-HSA-5654696	11/329	0.069954	SPRED1;PPP2R5E;ERBB4;RASA1;PAQR3;FN1;MDM2;NF1;PIP5K1B;MTOR;TNRC6B
Downstream signaling of activated FGFR3_Homo sapiens_R-HSA-5654708	11/329	0.069954	SPRED1;PPP2R5E;ERBB4;RASA1;PAQR3;FN1;MDM2;NF1;PIP5K1B;MTOR;TNRC6B
Downstream signaling of activated FGFR4_Homo sapiens_R-HSA-5654716	11/329	0.069954	SPRED1;PPP2R5E;ERBB4;RASA1;PAQR3;FN1;MDM2;NF1;PIP5K1B;MTOR;TNRC6B
Downstream signaling of activated FGFR1_Homo sapiens_R-HSA-5654687	11/332	0.069954	SPRED1;PPP2R5E;ERBB4;RASA1;PAQR3;FN1;MDM2;NF1;PIP5K1B;MTOR;TNRC6B
Signaling by FGFR4_Homo sapiens_R-HSA-5654743	11/332	0.069954	SPRED1;PPP2R5E;ERBB4;RASA1;PAQR3;FN1;MDM2;NF1;PIP5K1B;MTOR;TNRC6B
Nectin/Necl trans heterodimerization_Homo sapiens_R-HSA-420597	2/7	0.069954	PVRL3;PVRL2
Signaling by FGFR3_Homo sapiens_R-HSA-5654741	11/333	0.069954	SPRED1;PPP2R5E;ERBB4;RASA1;PAQR3;FN1;MDM2;NF1;PIP5K1B;MTOR;TNRC6B
Amino acid and oligopeptide SLC transporters_Homo sapiens_R-HSA-425374	4/49	0.069954	SLC6A6;SLC38A1;SLC1A2;SLC7A11
Retrograde transport at the Trans-Golgi-Network_Homo sapiens_R-HSA-6811440	4/49	0.069954	GOLGA4;GCC1;RAB6A;VAMP3
Signaling by FGFR1_Homo sapiens_R-HSA-5654736	11/336	0.069954	SPRED1;PPP2R5E;ERBB4;RASA1;PAQR3;FN1;MDM2;NF1;PIP5K1B;MTOR;TNRC6B
IGF1R signaling cascade_Homo sapiens_R-HSA-2428924	10/288	0.069954	SPRED1;PRKAA2;PPP2R5E;ERBB4;RASA1;PAQR3;FN1;NF1;IGF1;MTOR
IRS-related events triggered by IGF1R_Homo sapiens_R-HSA-2428928	10/288	0.069954	SPRED1;PRKAA2;PPP2R5E;ERBB4;RASA1;PAQR3;FN1;NF1;IGF1;MTOR
Signaling by Type 1 Insulin-like Growth Factor 1 Receptor (IGF1R)_Homo sapiens_R-HSA-2404192	10/288	0.069954	SPRED1;PRKAA2;PPP2R5E;ERBB4;RASA1;PAQR3;FN1;NF1;IGF1;MTOR
Downstream signal transduction_Homo sapiens_R-HSA-186763	11/341	0.069954	SPRED1;PPP2R5E;ERBB4;RASA1;PAQR3;FN1;MDM2;NF1;PIP5K1B;MTOR;TNRC6B
PTK6 Regulates RHO GTPases, RAS GTPase and MAP kinases_Homo sapiens_R-HSA-8849471	3/26	0.069954	SPRED1;RASA1;NF1
DAP12 signaling_Homo sapiens_R-HSA-2424491	11/344	0.069954	SPRED1;PPP2R5E;ERBB4;RASA1;PAQR3;FN1;MDM2;NF1;PIP5K1B;MTOR;TNRC6B
Downregulation of ERBB4 signaling_Homo sapiens_R-HSA-1253288	2/8	0.069954	ERBB4;NEDD4
PI-3K cascade:FGFR1_Homo sapiens_R-HSA-5654689	6/122	0.069954	PPP2R5E;ERBB4;MDM2;PIP5K1B;MTOR;TNRC6B
PI-3K cascade:FGFR2_Homo sapiens_R-HSA-5654695	6/122	0.069954	PPP2R5E;ERBB4;MDM2;PIP5K1B;MTOR;TNRC6B
PI-3K cascade:FGFR3_Homo sapiens_R-HSA-5654710	6/122	0.069954	PPP2R5E;ERBB4;MDM2;PIP5K1B;MTOR;TNRC6B
PI-3K cascade:FGFR4_Homo sapiens_R-HSA-5654720	6/122	0.069954	PPP2R5E;ERBB4;MDM2;PIP5K1B;MTOR;TNRC6B
PI3K events in ERBB4 signaling_Homo sapiens_R-HSA-1250342	6/122	0.069954	PPP2R5E;ERBB4;MDM2;PIP5K1B;MTOR;TNRC6B
PIP3 activates AKT signaling_Homo sapiens_R-HSA-1257604	6/122	0.069954	PPP2R5E;ERBB4;MDM2;PIP5K1B;MTOR;TNRC6B
GAB1 signalosome_Homo sapiens_R-HSA-180292	6/125	0.0744709	PPP2R5E;ERBB4;MDM2;PIP5K1B;MTOR;TNRC6B
PI3K/AKT activation_Homo sapiens_R-HSA-198203	6/125	0.0744709	PPP2R5E;ERBB4;MDM2;PIP5K1B;MTOR;TNRC6B
Signaling by EGFR_Homo sapiens_R-HSA-177929	11/355	0.0771572	SPRED1;PPP2R5E;ERBB4;RASA1;PAQR3;FN1;MDM2;NF1;PIP5K1B;MTOR;TNRC6B
Axon guidance_Homo sapiens_R-HSA-422475	14/515	0.0789667	YES1;SDC2;PAQR3;FN1;UNC5C;SEMA3E;SPRED1;PPP2R5E;ERBB4;RASA1;NF1;MET;PAK4;CLASP2
DAP12 interactions_Homo sapiens_R-HSA-2172127	11/359	0.0795639	SPRED1;PPP2R5E;ERBB4;RASA1;PAQR3;FN1;MDM2;NF1;PIP5K1B;MTOR;TNRC6B
Signaling by FGFR2_Homo sapiens_R-HSA-5654738	11/361	0.0808301	SPRED1;PPP2R5E;ERBB4;RASA1;PAQR3;FN1;MDM2;NF1;PIP5K1B;MTOR;TNRC6B
Signaling by PDGF_Homo sapiens_R-HSA-186797	11/364	0.0837916	SPRED1;PPP2R5E;ERBB4;RASA1;PAQR3;FN1;MDM2;NF1;PIP5K1B;MTOR;TNRC6B
Signaling by FGFR_Homo sapiens_R-HSA-190236	11/366	0.0845168	SPRED1;PPP2R5E;ERBB4;RASA1;PAQR3;FN1;MDM2;NF1;PIP5K1B;MTOR;TNRC6B
Regulation of signaling by NODAL_Homo sapiens_R-HSA-1433617	2/10	0.0845168	ACVR2B;ACVR2A
Amino acid transport across the plasma membrane_Homo sapiens_R-HSA-352230	3/31	0.0845168	SLC6A6;SLC38A1;SLC7A11
RHO GTPases activate KTN1_Homo sapiens_R-HSA-5625970	2/11	0.098388	KIF5B;KTN1

## Sheet:  Midnight Blue
REACTOME 2016- Biological Pathways (3 enriched pathways)
Term	Overlap	Adjusted P value	Genes
NF-kB activation through FADD/RIP-1 pathway mediated by caspase-8 and -10_Homo sapiens_R-HSA-933543	2/12	0.010511	MAVS;CASP10
TP53 Regulates Transcription of Caspase Activators and Caspases_Homo sapiens_R-HSA-6803207	2/12	0.010511	CASP10;ATM
TP53 Regulates Transcription of Cell Death Genes_Homo sapiens_R-HSA-5633008	2/43	0.0934309	CASP10;ATM

[truncated: 1 more sheets:  Light Cyan]
